# Supplementary material for: Quantitative proteomics of rat livers shows that unrestricted feeding is stressful for proteostasis with implications on life span
Source: PubMed Central journal article supplement (PMC5032693; doi:10.18632/aging.101009), 2016-08-09
Supplement: aging-08-1735-s001.pdf [file aging-08-1735-s001.pdf]

SUPPLEMENRATY DATA

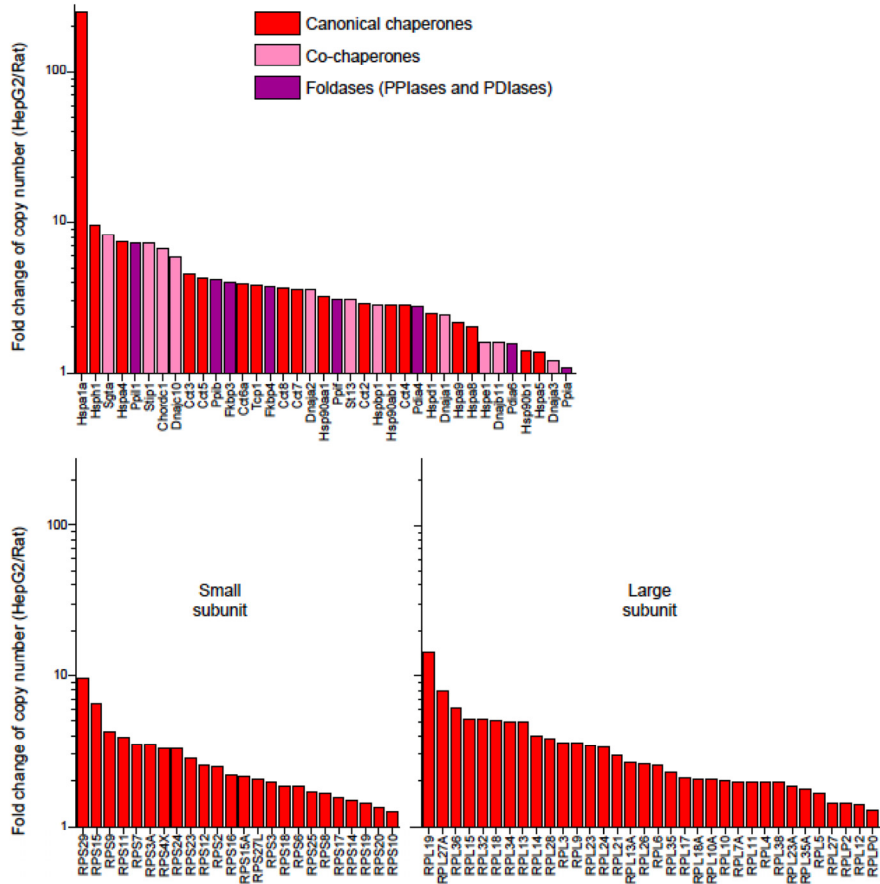

**Supplementary Figure 1.** Fold difference comparison (in log scale) between human HepG2 cells and rat liver cells of chaperone, co-chaperones and foldases (upper panel) and of ribosomal protein copy numbers (lower panel) per micron cube of cell.

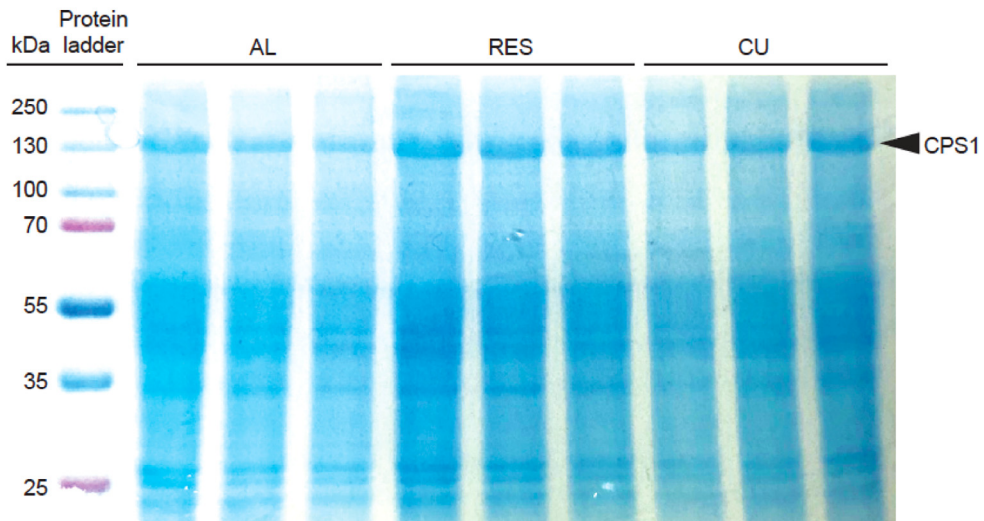

**Supplementary Figure 2.** Coomassie stained SDS-PAGE of total liver proteins from the AL, RES and CU tissues. Arrow indicates the 165 kDa CPS1.

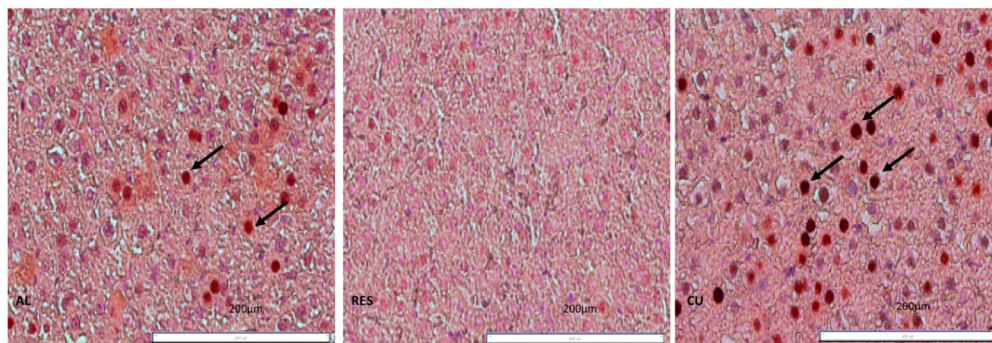

**Supplementary Figure 3.** Immuno-histochemical staining with peroxidase of AL, RES and CU liver thin sections labeled with specific antibodies against the Proliferating Cell Nuclear Protein (PCNA).

**Supplementary Table 1.** List of 5138 detected polypeptides in AL, RES and CU rat livers. **Sheet 1:** Raw iBAQs from 18 samples: 6 AL, 6 RES and 6 CU biological repeats. Proteins were sorted alphabetically. **Sheet 2:** Relative mass fractions, expressed in % of total protein mass in each of the 18 samples. Proteins were sorted alphabetically. **Sheet 3:** Relative copy number per micron cube cell in the 18 samples. Proteins were sorted alphabetically. **Sheet 4:** Mean mass fractions of

three AL, RES and CU means and their p-values expressed in % of total proteins. Proteins were sorted from the highest to lowest concentrations in RES. Bold numbers are significant means with P values < 0.05. **Sheet 5:** Mean copy numbers per cubic micrometers cell of AL, RES and CU and their SD. Proteins were sorted from the highest to lowest number in RES. Please browse Full text version of this manuscript to see this table in Excel format.

**Supplementary Table 2A.** Significantly quantified proteins from AL-rat liver cells (this study) and human HepG2 cell [33] were sorted according to gene ontology (GO) categories and analyzed for their statistically significant representation in the sample ( $p < 0.05$ ). 21 GO categories were retained for containing each at least 2% of the total cellular protein mass.

| PANTHER GO-Slim Biological Process             | SUM mass-rat liver (%) | SUM mass-HepG2 (%) |
|------------------------------------------------|------------------------|--------------------|
| Metabolic process                              | 69.5                   | 63.7               |
| Primary metabolic process                      | 55.6                   | 56.4               |
| Cellular amino acid metabolic process          | 18.0                   | 5.2                |
| Protein metabolic process                      | 16.7                   | 32.1               |
| Nitrogen compound metabolic process            | 14.5                   | 6.3                |
| Lipid metabolic process                        | 13.4                   | 5.9                |
| Generation of precursor metabolites and energy | 12.9                   | 6.0                |
| Transport                                      | 12.4                   | 12.6               |
| Carbohydrate metabolic process                 | 10.6                   | 7.7                |
| Respiratory electron transport chain           | 8.5                    | 2.5                |
| Fatty acid metabolic process                   | 7.9                    | 2.7                |
| Biological regulation                          | 5.8                    | 11.1               |
| Translation                                    | 5.8                    | 12.2               |
| Monosaccharide metabolic process               | 5.2                    | 3.8                |
| Cellular component organization or biogenesis  | 4.5                    | 9.8                |
| Regulation of biological process               | 4.2                    | 8.4                |
| Protein transport                              | 3.7                    | 7.3                |
| Intracellular protein transport                | 3.6                    | 7.2                |
| System process                                 | 3.0                    | 3.8                |
| Multicellular organismal process               | 2.8                    | 4.1                |
| Proteolysis                                    | 2.3                    | 3.6                |

**Supplementary Table 2B.** Compared mass fractions of the MS quantified ribosomal proteins from AL-rat liver cells and human HepG2 cell.

| <b>Ribosome</b> | <b>Mass-rat liver (%)</b> | <b>Mass-HepG2 (%)</b> |
|-----------------|---------------------------|-----------------------|
| Rps10           | 0.03                      | 0.04                  |
| Rps11           | 0.03                      | 0.12                  |
| Rps12           | 0.04                      | 0.11                  |
| Rps13           | 0.05                      | 0.06                  |
| Rps14           | 0.06                      | 0.09                  |
| Rps15           | 0.00                      | 0.02                  |
| Rps15a          | 0.03                      | 0.06                  |
| Rps16           | 0.05                      | 0.11                  |
| Rps17           | 0.03                      | 0.05                  |
| Rps18           | 0.06                      | 0.11                  |
| Rps19           | 0.04                      | 0.06                  |
| Rps2            | 0.03                      | 0.10                  |
| Rps20           | 0.07                      | 0.10                  |
| Rps21           | 0.02                      | 0.02                  |
| Rps23           | 0.01                      | 0.04                  |
| Rps24           | 0.01                      | 0.04                  |
| Rps25           | 0.06                      | 0.10                  |
| Rps26           | 0.03                      | 0.03                  |
| Rps27           | 0.01                      | 0.00                  |
| Rps271          | 0.01                      | 0.01                  |
| Rps28           | 0.01                      | 0.04                  |
| Rps29           | 0.00                      | 0.01                  |
| Rps3            | 0.07                      | 0.14                  |
| Rps30           | 0.01                      | 0.03                  |
| Rps3a           | 0.05                      | 0.17                  |
| Rps4x           | 0.05                      | 0.15                  |
| Rps5            | 0.04                      | 0.09                  |
| Rps6            | 0.06                      | 0.11                  |
| Rps7            | 0.03                      | 0.09                  |
| Rps8            | 0.11                      | 0.19                  |
| Rps9            | 0.04                      | 0.16                  |
| RpsA            | 0.15                      | 0.15                  |
| Rpl10           | 0.02                      | 0.04                  |
| Rpl10A          | 0.06                      | 0.11                  |
| Rpl11           | 0.04                      | 0.08                  |
| Rpl12           | 0.05                      | 0.08                  |
| Rpl13           | 0.03                      | 0.15                  |
| Rpl13A          | 0.03                      | 0.09                  |
| Rpl14           | 0.03                      | 0.10                  |
| Rpl15           | 0.02                      | 0.08                  |
| Rpl17           | 0.02                      | 0.05                  |
| Rpl18           | 0.03                      | 0.15                  |

**Supplementary Table 2B.** continue

|        |      |      |
|--------|------|------|
| Rpl18A | 0.02 | 0.05 |
| Rpl19  | 0.01 | 0.11 |
| Rpl21  | 0.01 | 0.04 |
| Rpl22  | 0.03 | 0.10 |
| Rpl23  | 0.02 | 0.07 |
| Rpl23A | 0.05 | 0.10 |
| Rpl24  | 0.02 | 0.07 |
| Rpl26  | 0.02 | 0.05 |
| Rpl27  | 0.07 | 0.10 |
| Rpl27A | 0.02 | 0.13 |
| Rpl28  | 0.01 | 0.03 |
| Rpl29  | 0.00 | 0.03 |
| Rpl3   | 0.05 | 0.19 |
| Rpl30  | 0.05 | 0.08 |
| Rpl31  | 0.02 | 0.05 |
| Rpl32  | 0.01 | 0.07 |
| Rpl34  | 0.01 | 0.05 |
| Rpl35  | 0.04 | 0.09 |
| Rpl35A | 0.01 | 0.01 |
| Rpl36  | 0.01 | 0.07 |
| Rpl36A | 0.00 | 0.01 |
| Rpl37A | 0.01 | 0.02 |
| Rpl38  | 0.02 | 0.04 |
| Rpl39  | 0.01 | 0.01 |
| Rpl4   | 0.11 | 0.22 |
| Rpl5   | 0.07 | 0.11 |
| Rpl6   | 0.06 | 0.16 |
| Rpl7   | 0.09 | 0.15 |
| Rpl7A  | 0.10 | 0.19 |
| Rpl8   | 0.03 | 0.10 |
| Rpl9   | 0.02 | 0.09 |

**Supplementary Table 2C.** Compared mass fractions of the MS quantified chaperone proteins from AL-rat liver cells and human HepG2 cell.

| <b>Chaperome</b> | <b>Mass-rat liver (%)</b> | <b>Mass-HepG2 (%)</b> |
|------------------|---------------------------|-----------------------|
| Hsp90ab1         | 0.61                      | 1.73                  |
| Hspa5            | 0.60                      | 0.83                  |
| Hspd1            | 0.48                      | 1.20                  |
| Hsp90b1          | 0.44                      | 0.61                  |
| Hspa8            | 0.39                      | 0.77                  |
| Hspa9            | 0.18                      | 0.38                  |
| Hsp90aa1         | 0.15                      | 0.57                  |
| Hspe1            | 0.12                      | 0.19                  |
| Cct2             | 0.05                      | 0.14                  |
| Cct4             | 0.04                      | 0.12                  |
| Cct3             | 0.04                      | 0.20                  |
| Cct8             | 0.04                      | 0.14                  |
| Cct6a            | 0.04                      | 0.15                  |
| Cct5             | 0.04                      | 0.16                  |
| Cct1             | 0.03                      | 0.13                  |
| Cct7             | 0.03                      | 0.12                  |
| St13             | 0.03                      | 0.10                  |
| Dnajc3           | 0.03                      | 0.02                  |
| Hspa4            | 0.02                      | 0.19                  |
| Stip1            | 0.02                      | 0.17                  |
| Hsph1            | 0.01                      | 0.13                  |

**Supplementary Table 2D.** Calculations to establish the volume of a single hepatocyte cell according to Sohlenius-Sternbeck AK; Toxicol In Vitro. 2006; 20:1582-6.

| <b>Rat</b>                                     | <b>Value</b>                   |
|------------------------------------------------|--------------------------------|
| Net protein mass per gram of liver tissue      | 112 mg                         |
| Liver density                                  | 1.05 ± 0.05 g/ml               |
| Volume of 1 g of liver tissue                  | 0.95238 ml                     |
| Protein concentration in the liver             | 117.6 mg/ml                    |
| Protein concentration in hepatocyte suspension | 0.985 ± 0.211 mg/million cells |
| Protein mass per hepatocyte in suspension      | 985 pg/ cell                   |
| Mass protein in 100 million cells              | 98.5 micograms                 |
| Number of cells in a microgram of liver        | 114                            |
| Mass of a single hepatocyte cell               | 8.79464 ng                     |
| <b>Volume of a single hepatocyte cell</b>      | <b>8354 micrometer cube</b>    |

**Supplementary Table 3. Sheet 1:** 618 proteins that change significantly between AL and RES. **Sheet 2:** 513 Proteins that change significantly between CU and RES.

Please browse Full text version of this manuscript to see this table in Excel format.

**Supplementary Table 4.** Members of the HSP-chaperome are hallmarks of cellular stresses. Net increased concentrations of eight members of the HSP chaperome, expressed in copy number per micron cube of cell, in human Jurkat cells following a 4 hours heat-shock (HS) at 41°C (from Finka et al. 2016), or in rat liver cells (constantly at 37°C), following AL or CU feeding, compared to the RES regimen.

| <b>Protein name</b> | <b>DELTA-MEAN HS</b> | <b>DELTA-MEAN AL-RES</b> | <b>DELTA-MEAN CU-RES</b> |
|---------------------|----------------------|--------------------------|--------------------------|
| HSPA8               | 1391                 | 992                      | 2109                     |
| HSP90AB1            | 322                  | 2175                     | 2349                     |
| HSPA5               | 222                  | 2078                     | 1272                     |
| STIP1               | 144                  | 76                       | 135                      |
| FKBP4               | 93                   | 176                      | 226                      |
| CCT4                | 74                   | 246                      | 253                      |
| HSP90B1             | 74                   | 1340                     | 899                      |
| DNAJA1              | 72                   | 85                       | 107                      |

**Reference:**

Sohlenius-Sternbeck AK. Determination of the hepatocellularity number for human, dog, rabbit, rat and mouse livers from protein concentration measurements. *Toxicol In Vitro* 2006; 20:1582-1586.

Finka A, Sood V, Quadroni M, Rios PL, Goloubinoff P. Quantitative proteomics of heat-treated human cells show an across-the-board mild depletion of housekeeping proteins to massively accumulate few HSPs. *Cell Stress Chaperones*. 2015; 20:605–20.
