# Supplementary material for: Quantitative proteomics of rat livers shows that unrestricted feeding is stressful for proteostasis with implications on life span
Source: publisher site journal article supplement (doi:10.18632/aging.101009), 2016-08-09
Supplement: Supplementary file 1 [file aging-v8i8-101009-supplementary-material-SD2.xlsx]

## Sheet: IBAQs
Normalized IBAQ values of the 5138 proteins that were identified at least once in the 18 samples sorted in alphabetical order
							AL						RES						CU
Protein IDs	Majority protein IDs	Protein names	Gene names	Fasta headers	Mol. weight [kDa]	Sequence length	iBAQ 7413-1-AL-1	iBAQ 7414-2-AL-4	iBAQ 7415-3-AL-5	iBAQ 7416-4-AL-14	iBAQ 7417-5-AL-15	iBAQ 7418-6-AL-20	iBAQ 7419-7-RES-1	iBAQ 7420-8-RES-4	iBAQ 7421-9-RES-6	iBAQ 7422-10-RES-10	iBAQ 7423-11-RES-13	iBAQ 7424-12-RES-16	iBAQ 7425-13-CU-1	iBAQ 14-CU-4	iBAQ 7427-15-CU-6	iBAQ 7428-16-CU-3	iBAQ 7429-17-CU-17	iBAQ 7430-18-CU-18
A0FKI7-2;A0FKI7;A0FKI7-3;M0R8D7;M0R9S4	A0FKI7-2;A0FKI7;A0FKI7-3;M0R8D7;M0R9S4	Acyl-CoA-binding domain-containing protein 5	Acbd5;LOC679565;LOC100910957	>sp|A0FKI7-2|ACBD5_RAT Isoform 2 of Acyl-CoA-binding domain-containing protein 5 OS=Rattus norvegicus GN=Acbd5;>sp|A0FKI7|ACBD5_RAT Acyl-CoA-binding domain-containing protein 5 OS=Rattus norvegicus GN=Acbd5 PE=1 SV=1;>sp|A0FKI7-3|ACBD5_RAT Isoform 3 of Acy	52.488	471	132430	495170	5428700	6816100	1756400	3410500	52525	207690	1461100	14445000	2265100	3028200	545830	78053	6055800	7899300	4892400	1151400
A0JN29	A0JN29		Lnp	>tr|A0JN29|A0JN29_RAT Limb and neural patterns OS=Rattus norvegicus GN=Lnp PE=2 SV=1	42.169	376	0	1440100	0	1012300	701670	1287800	0	0	223670	901050	363710	619080	0	0	0	311290	937330	144710
A0JN30	A0JN30		Cnpy2	>tr|A0JN30|A0JN30_RAT Canopy 2 homolog (Zebrafish) OS=Rattus norvegicus GN=Cnpy2 PE=2 SV=1	20.709	182	22640000	20097000	132810000	204970000	122060000	140410000	9233200	15746000	95638000	166240000	78882000	110810000	8843900	8959600	111510000	108450000	148800000	17746000
A0JPJ0	A0JPJ0		Nmnat1	>tr|A0JPJ0|A0JPJ0_RAT Nicotinamide nucleotide adenylyltransferase 1 OS=Rattus norvegicus GN=Nmnat1 PE=2 SV=1	32.534	285	464240	633750	5842000	6705600	424910	6597100	376500	630880	4223300	9293000	2846400	4843300	293550	237180	4684400	5161100	2586000	3698100
A0JPJ7	A0JPJ7	Obg-like ATPase 1	Ola1	>sp|A0JPJ7|OLA1_RAT Obg-like ATPase 1 OS=Rattus norvegicus GN=Ola1 PE=2 SV=1	44.535	396	5116200	9385800	38605000	55494000	37417000	40604000	3804100	7027800	26449000	49164000	23502000	16310000	4461900	5548300	50010000	55420000	30002000	31623000
A0JPM9;F1M0W4	A0JPM9	Eukaryotic translation initiation factor 3 subunit J	Eif3j	>sp|A0JPM9|EIF3J_RAT Eukaryotic translation initiation factor 3 subunit J OS=Rattus norvegicus GN=Eif3j PE=2 SV=1	29.187	259	8012000	11654000	33559000	50605000	25724000	43550000	3260600	6143100	37016000	45519000	26526000	24699000	5241900	7784700	60065000	56488000	67793000	44369000
A0JPN2	A0JPN2	Zinc transporter ZIP4	Slc39a4	>sp|A0JPN2|S39A4_RAT Zinc transporter ZIP4 OS=Rattus norvegicus GN=Slc39a4 PE=2 SV=1	71.121	656	0	21572	127720	7769200	1110100	3749500	183840	606980	1892200	10212000	5172100	3767900	435310	490600	11065000	3640000	14044000	6392200
A0JPQ8	A0JPQ8	Alkylglycerol monooxygenase	Agmo	>sp|A0JPQ8|ALKMO_RAT Alkylglycerol monooxygenase OS=Rattus norvegicus GN=Agmo PE=2 SV=1	51.697	447	1121900	2583500	15838000	17353000	1838400	22457000	1178200	1384900	10134000	20604000	8315900	9851900	1077400	242740	18798000	21574000	21632000	3755000
A0JPQ9;Q7TP14	A0JPQ9;Q7TP14	Chitinase domain-containing protein 1	Chid1	>sp|A0JPQ9|CHID1_RAT Chitinase domain-containing protein 1 OS=Rattus norvegicus GN=Chid1 PE=2 SV=2;>tr|Q7TP14|Q7TP14_RAT Cc1-9 OS=Rattus norvegicus GN=Chid1 PE=2 SV=1	44.874	393	3461400	2403200	28877000	37503000	16012000	25262000	2612200	4062900	13670000	21081000	9456300	5535300	1550500	1366800	16829000	20240000	10283000	17638000
A1A5Q1	A1A5Q1		Parp9	>tr|A1A5Q1|A1A5Q1_RAT Parp9 protein OS=Rattus norvegicus GN=Parp9 PE=2 SV=1	92.214	830	324520	581580	4552500	4015700	2264400	1510700	250220	264230	2477400	4321800	1488900	1030200	435400	156820	6901000	2900800	5145000	3979200
A1A5S1	A1A5S1	Pre-mRNA-processing factor 6	Prpf6	>sp|A1A5S1|PRP6_RAT Pre-mRNA-processing factor 6 OS=Rattus norvegicus GN=Prpf6 PE=2 SV=1	106.76	941	166990	280180	538300	383860	213260	237160	209150	179190	151020	489600	319280	424240	193660	84477	484130	198480	205190	411460
A1A5S4	A1A5S4		Sephs2	>tr|A1A5S4|A1A5S4_RAT Protein Sephs2 OS=Rattus norvegicus GN=Sephs2 PE=2 SV=1	35.61	331	6143600	7523600	51413000	69170000	20673000	40869000	10031000	7985200	46478000	57805000	37809000	29412000	4974500	6524700	85316000	47888000	45363000	31282000
A1EC97;M0R3K8	A1EC97;M0R3K8		Dusp14;Dusp14l1	>tr|A1EC97|A1EC97_RAT Dual specificity phosphatase 14 OS=Rattus norvegicus GN=Dusp14l1 PE=2 SV=1;>tr|M0R3K8|M0R3K8_RAT Protein Dusp14l1 OS=Rattus norvegicus GN=Dusp14l1 PE=4 SV=1	22.267	198	0	0	778860	0	13822	15940	0	0	0	0	7955.5	0	0	0	0	0	21338	0
A1KQY6	A1KQY6		LOC501189	>tr|A1KQY6|A1KQY6_RAT Alpha 2,8-sialyltransferase ST8Sia IV OS=Rattus norvegicus GN=Siat 8D PE=2 SV=1	51.761	454	0	0	420420	0	0	148590	0	0	0	141130	17535	0	0	0	124240	0	38518	0
A1L130	A1L130		Ing4	>tr|A1L130|A1L130_RAT Inhibitor of growth family, member 4 OS=Rattus norvegicus GN=Ing4 PE=2 SV=1	28.087	245	0	0	10547000	2047200	0	1696600	0	0	0	2279900	0	3457000	0	0	0	0	2609400	0
A1L134	A1L134	Ancient ubiquitous protein 1	Aup1	>sp|A1L134|AUP1_RAT Ancient ubiquitous protein 1 OS=Rattus norvegicus GN=Aup1 PE=2 SV=1	46.199	410	941120	1085500	5744300	10084000	8128400	2998700	884060	1080300	1673500	7079700	5627800	2850300	871670	1360300	6366600	8274900	4887000	7369800
A1L1I2;P31392	A1L1I2;P31392	G-protein coupled receptor 182	Gpr182	>tr|A1L1I2|A1L1I2_RAT G protein-coupled receptor 182 OS=Rattus norvegicus GN=Gpr182 PE=2 SV=1;>sp|P31392|GP182_RAT G-protein coupled receptor 182 OS=Rattus norvegicus GN=Gpr182 PE=2 SV=3	45.188	398	251960	489680	5689000	6742000	2837300	8977400	587560	522790	6220200	13075000	6704400	9430600	273500	376180	4212800	6003300	7893200	3918800
A1L1J8	A1L1J8		Rab5b	>tr|A1L1J8|A1L1J8_RAT Protein Rab5b OS=Rattus norvegicus GN=Rab5b PE=2 SV=1	23.674	215	3873800	7838700	36101000	11704000	27881000	24941000	3207200	4593400	27565000	47692000	20431000	24197000	5150100	3883600	36453000	36421000	25950000	4683900
A1L1J9	A1L1J9	Lipase maturation factor 2	Lmf2	>sp|A1L1J9|LMF2_RAT Lipase maturation factor 2 OS=Rattus norvegicus GN=Lmf2 PE=2 SV=1	80.253	702	971700	1678400	10606000	14691000	4851.4	9258800	1101200	966340	9324200	13820000	6268900	5493300	805800	157670	12036000	11323000	7643600	4034800
A1L1L2	A1L1L2	Transmembrane protein 214	Tmem214	>sp|A1L1L2|TM214_RAT Transmembrane protein 214 OS=Rattus norvegicus GN=Tmem214 PE=2 SV=1	76.565	685	1127300	1524600	8191300	7032600	5508700	5858800	1069700	1016600	3007700	3632000	2915800	2098100	1505900	1110700	7180200	7665700	5660900	7035600
A1L1L6	A1L1L6	Mitochondrial Rho GTPase	Rhot1	>tr|A1L1L6|A1L1L6_RAT Mitochondrial Rho GTPase OS=Rattus norvegicus GN=Rhot1 PE=2 SV=1	72.156	631	1667600	2801800	4992600	7565200	6003200	8428900	2195700	1914200	8424800	12030000	7725700	9832400	1276400	946640	8826100	8197100	8951500	8468200
A1L1M0;D4ACM4;P27791;P27791-2	A1L1M0;D4ACM4;P27791;P27791-2	cAMP-dependent protein kinase catalytic subunit alpha	Prkaca	>tr|A1L1M0|A1L1M0_RAT Protein kinase, cAMP-dependent, catalytic, alpha OS=Rattus norvegicus GN=Prkaca PE=2 SV=1;>tr|D4ACM4|D4ACM4_RAT cAMP-dependent protein kinase catalytic subunit alpha OS=Rattus norvegicus GN=Prkaca PE=4 SV=1;>sp|P27791|KAPCA_RAT cAMP-d	40.605	351	6891300	7018700	31218000	48908000	22846000	17767000	5554000	6059800	19909000	34469000	17950000	21219000	2073900	3288000	15194000	33797000	15960000	50415000
A2IBE0	A2IBE0		Car14	>tr|A2IBE0|A2IBE0_RAT Membrane-bound carbonic anhydrase 14 OS=Rattus norvegicus GN=Car14 PE=2 SV=1	37.525	337	3295000	6662000	24100000	38556000	32885000	36846000	4110200	6604700	19665000	31592000	34130000	17146000	4079500	4421500	34027000	23404000	18344000	60813000
A2RRT9	A2RRT9	Cytochrome P450 4V2	Cyp4v2	>sp|A2RRT9|CP4V2_RAT Cytochrome P450 4V2 OS=Rattus norvegicus GN=Cyp4v2 PE=2 SV=1	60.579	525	3506700	2509700	12490000	19040000	13770000	16584000	2450300	2354500	7134300	15830000	14016000	12503000	2500100	1065700	17043000	15808000	13007000	21053000
A2RRU2	A2RRU2		Tmem127	>tr|A2RRU2|A2RRU2_RAT Protein Tmem127 OS=Rattus norvegicus GN=Tmem127 PE=2 SV=1	25.857	238	0	0	0	220130	0	47910	0	0	0	0	0	0	0	0	95852	0	0	0
A2RUW1	A2RUW1	Toll-interacting protein	Tollip	>sp|A2RUW1|TOLIP_RAT Toll-interacting protein OS=Rattus norvegicus GN=Tollip PE=2 SV=1	30.314	274	3382500	4217600	23197000	29707000	16828000	21917000	2613400	4235400	18284000	47043000	17331000	31423000	2306800	2873200	37525000	29685000	27402000	20566000
A2VCV7;Q9JJS8;Q9JJS8-2	A2VCV7;Q9JJS8	Mannan-binding lectin serine protease 2;Mannan-binding lectin serine protease 2 A chain;Mannan-binding lectin serine protease 2 B chain	Masp2	>tr|A2VCV7|A2VCV7_RAT Mannan-binding lectin serine peptidase 2 OS=Rattus norvegicus GN=Masp2 PE=2 SV=1;>sp|Q9JJS8|MASP2_RAT Mannan-binding lectin serine protease 2 OS=Rattus norvegicus GN=Masp2 PE=1 SV=2	75.573	685	790590	230040	477970	1065800	0	1197800	59839	39774	673290	687940	415830	739630	19910	42332	848590	594010	737920	175050
A2VCV8	A2VCV8		Mlx	>tr|A2VCV8|A2VCV8_RAT MAX-like protein X OS=Rattus norvegicus GN=Mlx PE=2 SV=1	33.42	298	0	0	635430	864790	306620	719550	0	0	0	1446000	148700	464910	0	76964	1307000	1222900	532600	0
A2VCW9;D4ACE9	A2VCW9;D4ACE9	Alpha-aminoadipic semialdehyde synthase, mitochondrial;Lysine ketoglutarate reductase;Saccharopine dehydrogenase	Aass	>sp|A2VCW9|AASS_RAT Alpha-aminoadipic semialdehyde synthase, mitochondrial OS=Rattus norvegicus GN=Aass PE=2 SV=1;>tr|D4ACE9|D4ACE9_RAT Alpha-aminoadipic semialdehyde synthase, mitochondrial OS=Rattus norvegicus GN=Aass PE=4 SV=2	102.91	926	9589100	15386000	83808000	98056000	55589000	34781000	33899000	22978000	162310000	210950000	141420000	156840000	22312000	14416000	191400000	161350000	208440000	107660000
A2VCX1	A2VCX1	TIP41-like protein	Tiprl	>sp|A2VCX1|TIPRL_RAT TIP41-like protein OS=Rattus norvegicus GN=Tiprl PE=2 SV=1	31.224	271	920640	1256100	7984000	2903700	2669600	6823300	178680	653980	5192200	8651000	2978000	5996100	49781	653170	3768400	5855300	7946800	5619000
A2VD12	A2VD12	Pre-B-cell leukemia transcription factor-interacting protein 1	Pbxip1	>sp|A2VD12|PBIP1_RAT Pre-B-cell leukemia transcription factor-interacting protein 1 OS=Rattus norvegicus GN=Pbxip1 PE=2 SV=1	80.275	722	0	0	0	387420	437350	328430	0	0	0	659350	290710	106200	0	0	0	58355	470610	0
A3KN98	A3KN98		Bco2	>tr|A3KN98|A3KN98_RAT Bco2 protein OS=Rattus norvegicus GN=Bco2 PE=2 SV=1	60.19	532	889350	486520	17938000	10648000	9171400	6809500	2701200	2186000	22803000	20591000	18168000	16819000	1889900	2544100	21193000	21639000	18025000	26257000
A3KNA0	A3KNA0		Aqr	>tr|A3KNA0|A3KNA0_RAT Aqr protein OS=Rattus norvegicus GN=Aqr PE=2 SV=1	170.76	1484	0	0	332900	382400	650870	238580	0	0	223780	0	206570	398170	0	0	186030	119270	186820	293490
A4L9P7	A4L9P7	Sister chromatid cohesion protein PDS5 homolog A	Pds5a	>sp|A4L9P7|PDS5A_RAT Sister chromatid cohesion protein PDS5 homolog A OS=Rattus norvegicus GN=Pds5a PE=2 SV=1	150.28	1333	50320	107460	488520	788500	150210	283250	88013	37395	742050	1384900	283250	1081100	88740	49378	831540	465010	1588400	471620
A5HKJ3	A5HKJ3		Pomp	>tr|A5HKJ3|A5HKJ3_RAT Proteasome maturation protein OS=Rattus norvegicus GN=Pomp PE=2 SV=1	15.844	141	0	0	2218300	2080100	2215300	3419200	0	0	2452400	2740700	1578200	1779000	0	131610	1864700	2001600	3874000	0
A7VJC2;A7VJC2-4	A7VJC2;A7VJC2-4	Heterogeneous nuclear ribonucleoproteins A2/B1	Hnrnpa2b1	>sp|A7VJC2|ROA2_RAT Heterogeneous nuclear ribonucleoproteins A2/B1 OS=Rattus norvegicus GN=Hnrnpa2b1 PE=1 SV=1;>sp|A7VJC2-4|ROA2_RAT Isoform B0b of Heterogeneous nuclear ribonucleoproteins A2/B1 OS=Rattus norvegicus GN=Hnrnpa2b1	37.477	353	0	0	0	0	0	0	0	0	0	0	0	0	0	0	0	0	0	457430
A8WCF8	A8WCF8	Tumor protein p63-regulated gene 1-like protein	Tprg1l	>sp|A8WCF8|TPRGL_RAT Tumor protein p63-regulated gene 1-like protein OS=Rattus norvegicus GN=Tprg1l PE=1 SV=1	29.844	266	523460	906310	2156900	3600200	0	4554200	188280	258060	1948100	3457300	3398900	3192400	80492	373590	4304200	3879600	3172900	9025000
A9CMB8;Q62724	A9CMB8		Mcm6	>tr|A9CMB8|A9CMB8_RAT DNA replication licensing factor MCM6 OS=Rattus norvegicus GN=Mcm6 PE=2 SV=1	92.814	821	87684	106510	2165100	1168500	418070	436440	0	33027	406390	277380	344540	131600	104300	208200	2529900	1525600	1140200	607670
A9UMV2	A9UMV2		Mrps24	>tr|A9UMV2|A9UMV2_RAT Mitochondrial ribosomal protein S24 OS=Rattus norvegicus GN=Mrps24 PE=2 SV=1	18.742	167	371910	644620	3437500	11199000	1367700	5229100	318780	696580	5478200	12322000	1835200	4912600	408240	445950	6204400	6343300	6167500	155350
A9UMV7	A9UMV7		LOC686442	>tr|A9UMV7|A9UMV7_RAT Protein LOC686442 OS=Rattus norvegicus GN=LOC686442 PE=2 SV=1	6.5386	56	0	2705600	15935000	12330000	21370000	121720000	23559000	2277500	18436000	37978000	9437900	4624400	2695700	41875	7035900	3477700	73704000	0
A9UMV8;Q6I8Q6;Q64598;Q4FZT6;P0C170;P0C169;M0RCL5;G3V9C0;D3ZVK7;M0RDM4;Q00728;D3ZXP3;D3ZWE0;M0R6X5	A9UMV8;Q6I8Q6;Q64598;Q4FZT6;P0C170;P0C169;M0RCL5;G3V9C0;D3ZVK7;M0RDM4;Q00728;D3ZXP3;D3ZWE0	Histone H2A.J;Histone H2A;Histone H2A type 1-F;Histone H2A type 3;Histone H2A type 1-E;Histone H2A type 1-C;Histone H2A type 4	H2afj;Hist1h2af;LOC100910554;Hist1h2ai;Hist1h2ak;LOC680322;H2afx;Hist2h2ab	>sp|A9UMV8|H2AJ_RAT Histone H2A.J OS=Rattus norvegicus GN=H2afj PE=2 SV=1;>tr|Q6I8Q6|Q6I8Q6_RAT Histone H2A OS=Rattus norvegicus GN=Hist1h2af PE=3 SV=1;>sp|Q64598|H2A1F_RAT Histone H2A type 1-F OS=Rattus norvegicus PE=3 SV=3;>sp|Q4FZT6|H2A3_RAT Histone H2A	14.045	129	589140	1325100	0	0	3034100	0	323010	351170	0	0	0	0	801640	131650	0	0	0	0
A9UMV9	A9UMV9		Ndufa7	>tr|A9UMV9|A9UMV9_RAT Ndufa7 protein OS=Rattus norvegicus GN=Ndufa7 PE=2 SV=1	12.5	112	11880000	12153000	29094000	43184000	10072000	16647000	4806600	6535200	10361000	43042000	12685000	12706000	4179400	2828500	17566000	32102000	18378000	50927000
A9UMW0	A9UMW0		Ubl5	>tr|A9UMW0|A9UMW0_RAT Protein Ubl5 OS=Rattus norvegicus GN=Ubl5 PE=2 SV=1	8.5468	73	1012700	2192100	11777000	10669000	1255700	171530	1381000	1516600	6784000	10133000	638730	1256900	1598100	1082100	11533000	12793000	1954900	0
A9UMW3	A9UMW3		Ahsp	>tr|A9UMW3|A9UMW3_RAT Erythroid associated factor OS=Rattus norvegicus GN=Ahsp PE=2 SV=1	11.707	102	0	0	5430700	4287700	1379200	27904000	0	0	0	385400	0	0	0	0	0	196800	268600	0
B0BMS8;Q64122	B0BMS8;Q64122	Myosin regulatory light polypeptide 9	Myl9	>tr|B0BMS8|B0BMS8_RAT Myl9 protein OS=Rattus norvegicus GN=Myl9 PE=2 SV=1;>sp|Q64122|MYL9_RAT Myosin regulatory light polypeptide 9 OS=Rattus norvegicus GN=Myl9 PE=1 SV=2	19.854	172	755950	1461800	6285200	12170000	2103700	10604000	634430	1126800	4453700	7552400	4382400	6576000	406020	864150	5549800	4373500	6551300	322100
B0BMT9	B0BMT9		Sqrdl	>tr|B0BMT9|B0BMT9_RAT Protein Sqrdl OS=Rattus norvegicus GN=Sqrdl PE=2 SV=1	50.201	450	296680	0	1335700	1902800	1647000	903490	77742	321940	1018500	2372500	761100	911850	0	71538	1278100	1142500	906900	1800800
B0BMV4	B0BMV4		Yif1a	>tr|B0BMV4|B0BMV4_RAT Protein Yif1a OS=Rattus norvegicus GN=Yif1a PE=2 SV=1	32.049	293	0	0	677260	749290	0	269710	0	0	199400	0	343880	90669	0	0	2513600	0	2589200	0
B0BMW0;P61107	B0BMW0;P61107	Ras-related protein Rab-14	Rab14	>tr|B0BMW0|B0BMW0_RAT RAB14, member RAS oncogene family OS=Rattus norvegicus GN=Rab14 PE=2 SV=1;>sp|P61107|RAB14_RAT Ras-related protein Rab-14 OS=Rattus norvegicus GN=Rab14 PE=1 SV=3	23.897	215	16227000	28712000	109180000	134610000	107450000	166720000	10664000	17981000	80518000	203980000	96147000	136240000	20993000	12795000	134100000	141120000	208270000	10412000
B0BMW2;O70351	B0BMW2;O70351	3-hydroxyacyl-CoA dehydrogenase type-2	Hsd17b10	>tr|B0BMW2|B0BMW2_RAT 3-hydroxyacyl-CoA dehydrogenase type-2 OS=Rattus norvegicus GN=Hsd17b10 PE=2 SV=1;>sp|O70351|HCD2_RAT 3-hydroxyacyl-CoA dehydrogenase type-2 OS=Rattus norvegicus GN=Hsd17b10 PE=1 SV=3	27.249	261	266800000	426940000	2224700000	1792800000	1075500000	2364500000	430670000	596590000	2349900000	4630100000	2192600000	2720700000	255660000	218140000	3128400000	2662700000	2747100000	441310000
B0BMW8;G3V8J7	B0BMW8;G3V8J7	CAAX prenyl protease 2	Rce1	>sp|B0BMW8|FACE2_RAT CAAX prenyl protease 2 OS=Rattus norvegicus GN=Rce1 PE=2 SV=1;>tr|G3V8J7|G3V8J7_RAT CAAX prenyl protease 2 OS=Rattus norvegicus GN=Rce1 PE=4 SV=1	33.646	308	0	0	0	0	0	582200	0	0	0	0	306050	197670	0	0	251380	0	261160	222760
B0BMX3	B0BMX3		S100a16	>tr|B0BMX3|B0BMX3_RAT Protein S100a16 OS=Rattus norvegicus GN=S100a16 PE=2 SV=1	14.224	123	0	262720	3649800	5698900	129370	4334100	908380	1433000	47373000	9336900	719110	1483800	445180	757410	15657000	5013700	1305100	2641200
B0BMX6	B0BMX6		Rpp25l	>tr|B0BMX6|B0BMX6_RAT Protein Rpp25l OS=Rattus norvegicus GN=Rpp25l PE=2 SV=1	17.688	163	247260	377100	3296900	4788500	1454500	2704900	159080	278520	1785900	4383500	1480500	1300700	245530	0	1900500	2288100	3202600	247950
B0BMY6	B0BMY6		Fam105b	>tr|B0BMY6|B0BMY6_RAT LOC64038 protein OS=Rattus norvegicus GN=Otulin PE=2 SV=1	40.447	353	0	0	450320	286620	881480	797400	0	0	519640	0	479760	559130	0	0	949220	711760	538420	108420
B0BMZ1;M0R549	B0BMZ1;M0R549		RGD1305587;LOC685881	>tr|B0BMZ1|B0BMZ1_RAT Protein RGD1305587 OS=Rattus norvegicus GN=RGD1305587 PE=2 SV=1;>tr|M0R549|M0R549_RAT Protein LOC685881 OS=Rattus norvegicus GN=LOC685881 PE=4 SV=1	13.185	120	6904200	11976000	53761000	46812000	4661000	38934000	6384000	7127100	26319000	6926700	18107000	20482000	11187000	5844000	19389000	5007100	7211500	10807000
B0BN02	B0BN02		Mtx1	>tr|B0BN02|B0BN02_RAT Mtx1 protein OS=Rattus norvegicus GN=Mtx1 PE=2 SV=1	48.443	432	2031200	4114200	18253000	25831000	12641000	18940000	2599100	3958400	13970000	27990000	18064000	13013000	2247400	2646900	20164000	20545000	23143000	29075000
B0BN18	B0BN18	Prefoldin subunit 2	Pfdn2	>sp|B0BN18|PFD2_RAT Prefoldin subunit 2 OS=Rattus norvegicus GN=Pfdn2 PE=2 SV=1	16.58	154	2990300	5141200	27302000	37803000	28169000	32182000	2365900	2502800	22074000	36412000	14757000	24348000	3273000	4264000	24494000	34598000	34864000	1540100
B0BN20	B0BN20		Tspan6	>tr|B0BN20|B0BN20_RAT Protein Tspan6 OS=Rattus norvegicus GN=Tspan6 PE=2 SV=1	27.535	245	0	0	213300	1445500	0	675690	0	0	812620	666710	265020	977360	0	0	827180	437280	305150	152640
B0BN30	B0BN30		Mtch1	>tr|B0BN30|B0BN30_RAT Mtch1 protein OS=Rattus norvegicus GN=Mtch1 PE=2 SV=1	41.592	389	2048100	518510	0	0	32449	94747	0	330700	511820	0	159840	56987	0	191510	319210	0	998750	217060
B0BN46	B0BN46		Grhpr	>tr|B0BN46|B0BN46_RAT Grhpr protein OS=Rattus norvegicus GN=Grhpr PE=2 SV=1	35.937	335	141010000	223660000	857100000	1217100000	484470000	881590000	117240000	147090000	753540000	1155000000	712380000	571000000	58642000	112970000	786890000	737990000	880240000	1032500000
B0BN47	B0BN47		Gstm6	>tr|B0BN47|B0BN47_RAT Glutathione S-transferase, mu 6 OS=Rattus norvegicus GN=Gstm6 PE=2 SV=1	25.626	218	0	0	3345900	2191800	0	112610	0	0	2232200	4043300	0	0	0	0	2948800	2071000	0	0
B0BN52	B0BN52		Mtch2	>tr|B0BN52|B0BN52_RAT Mitochondrial carrier homolog 2 (C. elegans) OS=Rattus norvegicus GN=Mtch2 PE=2 SV=1	33.528	303	119900000	157600000	776820000	706510000	314380000	822500000	133550000	192110000	579670000	1081400000	571680000	721620000	90871000	62722000	955860000	631620000	913090000	885150000
B0BN55;P32362	B0BN55;P32362	Uroporphyrinogen decarboxylase	Urod	>tr|B0BN55|B0BN55_RAT Uroporphyrinogen decarboxylase OS=Rattus norvegicus GN=Urod PE=2 SV=1;>sp|P32362|DCUP_RAT Uroporphyrinogen decarboxylase (Fragment) OS=Rattus norvegicus GN=Urod PE=1 SV=1	40.582	367	10642000	11817000	101380000	144310000	65320000	95445000	8421500	14500000	81435000	146750000	68131000	95690000	5039300	12897000	79849000	122120000	120090000	128110000
B0BN56	B0BN56	28S ribosomal protein S31, mitochondrial	Mrps31	>sp|B0BN56|RT31_RAT 28S ribosomal protein S31, mitochondrial OS=Rattus norvegicus GN=Mrps31 PE=2 SV=1	43.961	387	497440	351470	2860900	2251800	791060	2516800	359630	569340	2042400	3023200	759250	2809900	455050	426200	3018300	1959500	1834400	1729400
B0BN63	B0BN63		LOC681996	>tr|B0BN63|B0BN63_RAT LOC681996 protein OS=Rattus norvegicus GN=Ahsa1 PE=2 SV=1	38.104	338	8291300	15359000	42150000	65427000	30620000	60201000	5727000	8956500	21095000	43889000	31509000	30082000	7612900	9143100	33279000	45131000	56823000	29297000
B0BN65	B0BN65		Fam49a	>tr|B0BN65|B0BN65_RAT Family with sequence similarity 49, member A OS=Rattus norvegicus GN=Fam49a PE=2 SV=1	37.328	323	303160	375970	2137600	892030	222880	2723100	194840	286940	1117200	3124800	2117200	4090100	155950	252360	2126100	1863500	3413700	776160
B0BN68	B0BN68		Mrps9	>tr|B0BN68|B0BN68_RAT Mitochondrial ribosomal protein S9 OS=Rattus norvegicus GN=Mrps9 PE=2 SV=1	45.01	390	528440	1277600	8252600	14310000	6803800	10601000	537620	629000	8614500	16218000	7366400	10061000	468160	486300	10760000	11432000	8744900	10120000
B0BN70	B0BN70	Small integral membrane protein 7	Smim7	>sp|B0BN70|SMIM7_RAT Small integral membrane protein 7 OS=Rattus norvegicus GN=Smim7 PE=3 SV=1	8.5832	75	0	0	319660	1396800	0	1496100	0	0	248340	639940	564550	0	0	0	1278400	372910	1660200	0
B0BN72	B0BN72	Protein FAM195B	Fam195b	>sp|B0BN72|F195B_RAT Protein FAM195B OS=Rattus norvegicus GN=Fam195b PE=3 SV=1	11.101	97	67059	162580	2060500	931250	3374400	2377300	94681	113590	1905800	2424200	740460	1155900	117570	13832	506770	1182500	2239400	403100
B0BN73	B0BN73		Nat9	>tr|B0BN73|B0BN73_RAT N-acetyltransferase 9 (Predicted) OS=Rattus norvegicus GN=Nat9 PE=2 SV=1	27.72	241	0	0	0	565330	0	434710	0	0	0	1009600	348680	475220	0	0	964720	740680	767810	1043500
B0BN81;P24050	B0BN81;P24050	40S ribosomal protein S5;40S ribosomal protein S5, N-terminally processed	Rps5	>tr|B0BN81|B0BN81_RAT 40S ribosomal protein S5 OS=Rattus norvegicus GN=Rps5 PE=2 SV=1;>sp|P24050|RS5_RAT 40S ribosomal protein S5 OS=Rattus norvegicus GN=Rps5 PE=1 SV=3	22.906	204	20672000	67309000	381610000	339750000	479620000	483680000	20804000	34940000	223030000	565320000	231140000	266740000	26891000	24421000	415240000	365480000	579860000	59367000
B0BN85;F1LMY6	B0BN85	Suppressor of G2 allele of SKP1 homolog	Sugt1	>sp|B0BN85|SUGT1_RAT Suppressor of G2 allele of SKP1 homolog OS=Rattus norvegicus GN=Sugt1 PE=2 SV=1	38.09	336	2111600	2415300	18554000	16969000	3214000	12633000	1034700	355180	10611000	17185000	6581900	10205000	1241900	1263100	37504000	18651000	11026000	20330000
B0BN86;D4ABL1	B0BN86;D4ABL1	Transmembrane protein 11, mitochondrial	Tmem11;LOC688724	>sp|B0BN86|TMM11_RAT Transmembrane protein 11, mitochondrial OS=Rattus norvegicus GN=Tmem11 PE=2 SV=1;>tr|D4ABL1|D4ABL1_RAT Protein LOC688724 OS=Rattus norvegicus GN=LOC688724 PE=4 SV=1	21.341	190	4916700	8031900	36707000	61752000	48429000	41278000	5872600	6453100	28899000	82467000	34101000	43675000	6444800	2557700	41605000	45451000	30481000	52870
B0BN89	B0BN89		Dus2l	>tr|B0BN89|B0BN89_RAT Dihydrouridine synthase 2-like, SMM1 homolog (S. cerevisiae) OS=Rattus norvegicus GN=Dus2 PE=2 SV=1	55.41	493	0	99865	0	0	0	0	0	91967	0	0	0	0	0	0	0	148540	0	92653
B0BN93	B0BN93	26S proteasome non-ATPase regulatory subunit 13	Psmd13	>sp|B0BN93|PSD13_RAT 26S proteasome non-ATPase regulatory subunit 13 OS=Rattus norvegicus GN=Psmd13 PE=1 SV=1	42.817	376	9019200	19102000	84896000	81621000	54814000	66881000	10671000	15031000	63555000	59658000	51604000	48815000	10927000	13954000	115280000	86896000	72180000	112990000
B0BN94	B0BN94	Protein FAM136A	Fam136a	>sp|B0BN94|F136A_RAT Protein FAM136A OS=Rattus norvegicus GN=Fam136a PE=1 SV=1	15.625	138	2711900	5499300	2498900	28405000	11997000	5307600	2577300	1012800	13827000	30129000	11088000	6409900	2917000	3278800	12368000	4137500	21838000	9049200
B0BN99	B0BN99		Hmgb3	>tr|B0BN99|B0BN99_RAT Hmgb3 protein OS=Rattus norvegicus GN=Hmgb3 PE=2 SV=1	22.985	200	1346700	2812200	11412000	33097000	862520	532520	1341500	2304400	15982000	29197000	9906400	1655200	1191000	1242400	8904800	8223100	10966000	2300200
B0BNA3	B0BNA3		Rars2	>tr|B0BNA3|B0BNA3_RAT Arginyl-tRNA synthetase 2, mitochondrial OS=Rattus norvegicus GN=Rars2 PE=2 SV=1	65.303	578	21955	414380	316230	837070	745820	2087700	0	229180	1280800	1885400	832980	1594900	16710	79370	2013700	1885900	1175900	1462400
B0BNA5	B0BNA5	Coactosin-like protein	Cotl1	>sp|B0BNA5|COTL1_RAT Coactosin-like protein OS=Rattus norvegicus GN=Cotl1 PE=1 SV=1	15.932	142	4166300	9422500	68960000	66197000	75519000	70495000	8955500	7245500	74657000	78276000	35867000	55815000	5448600	4576000	48299000	40618000	74064000	1070300
B0BNA6	B0BNA6		Cnih	>tr|B0BNA6|B0BNA6_RAT Cornichon homolog (Drosophila) OS=Rattus norvegicus GN=Cnih1 PE=2 SV=1	16.699	144	0	0	6562700	12008000	0	15027000	0	0	1343900	16534000	3295400	3727400	0	0	9461400	5350700	8483800	0
B0BNA7;M0RCH0	B0BNA7;M0RCH0	Eukaryotic translation initiation factor 3 subunit I	Eif3i	>sp|B0BNA7|EIF3I_RAT Eukaryotic translation initiation factor 3 subunit I OS=Rattus norvegicus GN=Eif3i PE=2 SV=1;>tr|M0RCH0|M0RCH0_RAT Eukaryotic translation initiation factor 3 subunit I (Fragment) OS=Rattus norvegicus GN=Eif3i PE=3 SV=1	36.46	325	6374200	12350000	68305000	84654000	41009000	50810000	2425000	5835800	39859000	57583000	28732000	24792000	6270200	5418600	57171000	50797000	60219000	66876000
B0BNB1	B0BNB1		Commd1	>tr|B0BNB1|B0BNB1_RAT Commd1 protein OS=Rattus norvegicus GN=Commd1 PE=2 SV=1	21.037	188	659370	1575200	7811300	14260000	3868200	3953600	761800	946280	4805800	9498600	2329900	2596000	941560	950440	3577400	7308500	6340000	412540
B0BNB9;D3ZKF5	B0BNB9		Htra2	>tr|B0BNB9|B0BNB9_RAT HtrA serine peptidase 2 OS=Rattus norvegicus GN=Htra2 PE=2 SV=1	49.094	458	2603400	2254200	23205000	23270000	13672000	15914000	1853600	2338900	19747000	28769000	13168000	14314000	1390600	1262000	23889000	17948000	12012000	10750000
B0BNC4	B0BNC4		Agxt2l2	>tr|B0BNC4|B0BNC4_RAT Agxt2l2 protein OS=Rattus norvegicus GN=Phykpl PE=2 SV=1	52.296	476	4201200	3496400	21519000	23463000	13652000	20350000	3756100	4126000	13114000	25481000	14847000	16491000	2990100	3301500	16916000	15729000	12897000	21221000
B0BNC9	B0BNC9	Quinone oxidoreductase-like protein 2		>sp|B0BNC9|QORL2_RAT Quinone oxidoreductase-like protein 2 OS=Rattus norvegicus PE=2 SV=1	37.548	350	2492100	3377100	9067700	13117000	1131500	6561100	1436800	3935700	11639000	19968000	12315000	11597000	1704600	1509500	18856000	15447000	8674700	7049600
B0BND9	B0BND9		LOC100910272	>tr|B0BND9|B0BND9_RAT Protein LOC100910272 OS=Rattus norvegicus GN=LOC100910272 PE=2 SV=1	24.609	224	1732300	3792500	11261000	11986000	6080500	10504000	2458900	2281700	11101000	14177000	8473400	8463600	1899600	1778300	8219600	12010000	12102000	4749900
B0BNE2	B0BNE2	DNA-directed RNA polymerases I, II, and III subunit RPABC1	Polr2e	>sp|B0BNE2|RPAB1_RAT DNA-directed RNA polymerases I, II, and III subunit RPABC1 OS=Rattus norvegicus GN=Polr2e PE=2 SV=1	24.57	210	125670	552640	932210	1715800	421650	3263100	195900	281710	2814000	1429700	3142300	3432100	256430	182240	2073700	1868200	799360	0
B0BNE3	B0BNE3		Trappc5	>tr|B0BNE3|B0BNE3_RAT Protein Trappc5 OS=Rattus norvegicus GN=Trappc5 PE=2 SV=1	20.795	188	1578200	2107700	10346000	12257000	5486000	7059300	1109200	1510200	7027800	12329000	5470200	6426500	1550500	1322100	10307000	7150000	11804000	0
B0BNE5	B0BNE5	S-formylglutathione hydrolase	Esd	>sp|B0BNE5|ESTD_RAT S-formylglutathione hydrolase OS=Rattus norvegicus GN=Esd PE=1 SV=1	31.363	282	97395000	102090000	554960000	603120000	227090000	490870000	76698000	117730000	420010000	860230000	419160000	650270000	51286000	77554000	635370000	481070000	519470000	575320000
B0BNE6	B0BNE6		Ndufs8	>tr|B0BNE6|B0BNE6_RAT NADH dehydrogenase (Ubiquinone) Fe-S protein 8 (Predicted), isoform CRA_a OS=Rattus norvegicus GN=Ndufs8 PE=2 SV=1	23.97	212	4038100	19053000	78007000	81987000	50783000	50645000	8610000	12570000	33755000	139550000	80786000	70683000	9717200	4057100	55846000	59020000	135670000	13129000
B0BNF6	B0BNF6		March5	>tr|B0BNF6|B0BNF6_RAT Membrane-associated ring finger (C3HC4) 5 OS=Rattus norvegicus GN=March5 PE=2 SV=1	31.231	278	441760	1334000	6866900	12462000	2617300	13125000	787640	1144200	3660200	14639000	8577400	12069000	902730	422140	12509000	14753000	12898000	1732300
B0BNF8	B0BNF8		Htatip2	>tr|B0BNF8|B0BNF8_RAT HIV-1 tat interactive protein 2, homolog (Human) OS=Rattus norvegicus GN=Htatip2 PE=2 SV=1	26.856	242	2632000	1880200	10560000	9538800	1395100	5685300	491340	2202800	2329200	4934600	7676400	9715000	2214900	3143100	21796000	18205000	18077000	12342000
B0BNF9	B0BNF9		Hao1	>tr|B0BNF9|B0BNF9_RAT Hydroxyacid oxidase 1 OS=Rattus norvegicus GN=Hao1 PE=1 SV=1	40.968	370	140460000	205790000	1020600000	1234800000	853730000	816950000	61431000	122500000	433780000	763020000	524860000	450490000	90571000	86243000	915510000	547940000	608040000	732720000
B0BNG0	B0BNG0	ER membrane protein complex subunit 2	Emc2	>sp|B0BNG0|EMC2_RAT ER membrane protein complex subunit 2 OS=Rattus norvegicus GN=Emc2 PE=2 SV=1	34.869	297	7523400	12186000	44350000	65702000	18643000	52494000	8148500	7564700	35198000	49008000	31467000	32868000	6949200	5350300	70633000	42719000	62381000	45801000
B0BNG2	B0BNG2	Transmembrane 6 superfamily member 2	Tm6sf2	>sp|B0BNG2|TM6S2_RAT Transmembrane 6 superfamily member 2 OS=Rattus norvegicus GN=Tm6sf2 PE=2 SV=1	42.574	378	0	0	2707600	5201400	349520	5617800	0	0	1924400	4886800	5129200	4205200	0	0	2579100	4797600	6890600	5704400
B0BNG3	B0BNG3		Lman2	>tr|B0BNG3|B0BNG3_RAT Lman2 protein OS=Rattus norvegicus GN=Lman2 PE=2 SV=1	40.392	358	33159000	50769000	169370000	214090000	89074000	217410000	15236000	32894000	81738000	191520000	127800000	95204000	20020000	22975000	181960000	184580000	218380000	210730000
B0BNG7	B0BNG7		Nudt16l1	>tr|B0BNG7|B0BNG7_RAT Nudt16l1 protein OS=Rattus norvegicus GN=Nudt16l1 PE=2 SV=1	23.388	211	0	0	870670	1208400	107770	384970	0	0	712870	493860	486910	1015900	0	0	0	187300	1188800	0
B0BNJ1	B0BNJ1		Sri	>tr|B0BNJ1|B0BNJ1_RAT LOC683667 protein OS=Rattus norvegicus GN=Sri PE=2 SV=1	21.624	198	20197000	32617000	130270000	134830000	154120000	115570000	23841000	28566000	129030000	201730000	96103000	176870000	23166000	18221000	120150000	158480000	128050000	9759300
B0BNJ4	B0BNJ4		Ethe1	>tr|B0BNJ4|B0BNJ4_RAT Ethylmalonic encephalopathy 1 OS=Rattus norvegicus GN=Ethe1 PE=2 SV=1	27.676	254	35245000	63970000	382810000	274140000	250220000	344930000	61075000	82625000	394100000	569250000	320950000	435840000	40110000	31388000	480040000	369930000	362040000	45459000
B0BNJ9;M0R701;Q924P2	B0BNJ9;M0R701;Q924P2	Transmembrane protein 14C	Tmem14c;LOC100361993	>tr|B0BNJ9|B0BNJ9_RAT RCG44002, isoform CRA_a OS=Rattus norvegicus GN=Tmem14c PE=2 SV=1;>tr|M0R701|M0R701_RAT Protein LOC100361993 OS=Rattus norvegicus GN=LOC100361993 PE=4 SV=1;>sp|Q924P2|TM14C_RAT Transmembrane protein 14C OS=Rattus norvegicus GN=Tmem14c	11.658	114	1877900	2253500	36483000	71002000	13011000	56152000	3169700	2024500	58411000	130780000	39732000	28668000	6674600	0	61703000	62146000	62950000	5449400
B0BNK1;M0RDE4	B0BNK1		Rab5c	>tr|B0BNK1|B0BNK1_RAT Protein Rab5c OS=Rattus norvegicus GN=Rab5c PE=2 SV=1	23.425	216	10809000	23903000	176480000	162760000	49844000	135460000	11655000	14941000	130120000	241880000	69661000	132990000	10815000	10264000	150960000	182730000	119530000	5923900
B0BNL2	B0BNL2		LOC364561	>tr|B0BNL2|B0BNL2_RAT Peptidylprolyl cis/trans isomerase, NIMA-interacting 1 OS=Rattus norvegicus GN=LOC364561 PE=2 SV=1	18.332	165	1771900	3507600	10426000	29678000	24298000	18009000	967580	2002000	15702000	23031000	13385000	28835000	3251400	2511200	12079000	19966000	25187000	5359200
B0BNM0	B0BNM0		Tmem222	>tr|B0BNM0|B0BNM0_RAT Protein Tmem222 OS=Rattus norvegicus GN=Tmem222 PE=2 SV=1	23.282	208	0	0	0	190450	0	0	0	0	0	0	98826	0	0	0	240810	0	261560	0
B0BNM1	B0BNM1	NAD(P)H-hydrate epimerase	Apoa1bp	>sp|B0BNM1|NNRE_RAT NAD(P)H-hydrate epimerase OS=Rattus norvegicus GN=Apoa1bp PE=2 SV=1	30.89	282	13657000	23102000	100660000	102470000	72827000	120280000	13663000	21166000	83781000	174010000	80977000	117910000	12426000	12259000	100520000	121450000	101630000	12899000
B0BNM4	B0BNM4		RGD1308134	>tr|B0BNM4|B0BNM4_RAT Protein RGD1308134 OS=Rattus norvegicus GN=RGD1308134 PE=2 SV=1	17.954	171	113440	219760	607390	3384000	1292300	1330800	78824	159520	1151800	1577000	501530	235890	0	194340	1522100	1827400	1534500	12446
B0BNM9	B0BNM9	Glycolipid transfer protein	GLTP	>sp|B0BNM9|GLTP_RAT Glycolipid transfer protein OS=Rattus norvegicus GN=GLTP PE=2 SV=1	23.703	209	53863	79401	1568700	631850	613670	2243300	0	49170	885790	1988800	551760	1675600	28726	0	615320	239710	1215500	25305
B0BNN3	B0BNN3	Carbonic anhydrase 1	Ca1	>sp|B0BNN3|CAH1_RAT Carbonic anhydrase 1 OS=Rattus norvegicus GN=Ca1 PE=1 SV=1	28.299	261	49195000	33043000	266520000	302490000	176400000	616260000	105900000	44445000	1019800000	456050000	320840000	499480000	29991000	27706000	253990000	449960000	298230000	234990000
B0BNN4	B0BNN4		Cfp	>tr|B0BNN4|B0BNN4_RAT Complement factor properdin OS=Rattus norvegicus GN=Cfp PE=2 SV=1	50.572	465	0	0	289340	902240	2171800	5327800	0	0	1625600	2423900	3145900	2806700	0	0	761430	386410	3136500	1982000
B0K008;F1LWP8	B0K008		Eif1	>tr|B0K008|B0K008_RAT Eukaryotic translation initiation factor 1 OS=Rattus norvegicus GN=Eif1l1 PE=2 SV=1	12.746	113	6589000	15034000	76170000	59474000	105840000	185300000	7923600	11292000	32640000	98259000	68683000	98858000	19010000	7223300	126730000	68613000	238310000	37422000
B0K010	B0K010		Txndc17	>tr|B0K010|B0K010_RAT Protein Txndc17 OS=Rattus norvegicus GN=Txndc17 PE=2 SV=1	14.092	123	19882000	30354000	182020000	259230000	228200000	219310000	25848000	27723000	184770000	352290000	164040000	219960000	24456000	15661000	236730000	182420000	333210000	95074000
B0K013	B0K013		Coa4	>tr|B0K013|B0K013_RAT Chchd8 protein OS=Rattus norvegicus GN=Coa4 PE=2 SV=1	10.208	87	142410	254750	2888700	3366900	2681500	1452300	239020	252820	1325800	3630100	1094900	1562200	0	138170	1878300	0	2354600	573390
B0K014;D4A9K3	B0K014;D4A9K3	D-tyrosyl-tRNA(Tyr) deacylase	Dtd1	>tr|B0K014|B0K014_RAT D-tyrosyl-tRNA(Tyr) deacylase OS=Rattus norvegicus GN=Dtd1 PE=2 SV=1;>tr|D4A9K3|D4A9K3_RAT D-tyrosyl-tRNA(Tyr) deacylase OS=Rattus norvegicus GN=Dtd1 PE=3 SV=1	23.394	209	1626800	2923600	6870300	7382700	2715400	7643900	2112500	1772800	7783200	10469000	7168300	8338400	1488500	1699300	8583500	9144100	10607000	1222600
B0K015	B0K015		Commd8	>tr|B0K015|B0K015_RAT COMM domain containing 8 OS=Rattus norvegicus GN=Commd8 PE=2 SV=1	20.767	183	0	0	0	0	0	0	0	0	0	685170	562980	727320	0	0	0	494720	0	0
B0K017	B0K017		Adprhl2	>tr|B0K017|B0K017_RAT ADP-ribosylhydrolase like 2 OS=Rattus norvegicus GN=Adprhl2 PE=2 SV=1	39.375	370	2716100	3321300	15920000	23148000	8119400	12479000	2381900	1481600	16066000	13756000	5760200	9717400	2051300	1888200	9130000	18203000	14764000	10397000
B0K020	B0K020	CDGSH iron-sulfur domain-containing protein 1	Cisd1	>sp|B0K020|CISD1_RAT CDGSH iron-sulfur domain-containing protein 1 OS=Rattus norvegicus GN=Cisd1 PE=3 SV=1	12.097	108	64635000	96922000	339990000	970890000	541460000	619890000	85975000	112790000	451500000	1120500000	464380000	444470000	66116000	46799000	655480000	488500000	629660000	191190000
B0K025;M0RBX8	B0K025	Oligosaccharyltransferase complex subunit OSTC	Ostc	>sp|B0K025|OSTC_RAT Oligosaccharyltransferase complex subunit OSTC OS=Rattus norvegicus GN=Ostc PE=2 SV=1	16.815	149	10052000	5765100	60453000	133940000	95765000	165540000	2458800	6967000	66886000	77320000	67351000	102020000	13779000	4851700	105410000	65677000	121940000	46472000
B0K034	B0K034		Dtd2	>tr|B0K034|B0K034_RAT Protein Dtd2 OS=Rattus norvegicus GN=Dtd2 PE=2 SV=1	18.453	168	1885400	3461600	19453000	27031000	11748000	18371000	875510	1884000	14651000	23581000	8062700	10882000	2240300	2103100	7152000	14978000	16289000	1303400
B0K036	B0K036	Succinate dehydrogenase assembly factor 1, mitochondrial	Sdhaf1	>sp|B0K036|SDHF1_RAT Succinate dehydrogenase assembly factor 1, mitochondrial OS=Rattus norvegicus GN=Sdhaf1 PE=3 SV=1	13.312	118	0	0	0	1406600	1718800	1623200	0	0	2403800	6280500	2061800	2575900	0	0	2039400	3596700	2589300	206380
B1H227	B1H227		Rcc1	>tr|B1H227|B1H227_RAT LOC682908 protein OS=Rattus norvegicus GN=Rcc1 PE=2 SV=1	45.111	421	26593	450750	2012500	5710000	1674400	4864000	279290	560020	260380	4817700	2926300	501570	293230	468160	4073900	4362100	3724700	5264200
B1H230	B1H230		LOC100911550	>tr|B1H230|B1H230_RAT Map2k3 protein OS=Rattus norvegicus GN=LOC100911550 PE=2 SV=1	39.31	347	518210	390840	5652900	7725900	2436600	3144100	393160	213250	5675400	6473500	2443400	3069400	383080	228140	8718900	6149300	3297300	8278100
B1H249	B1H249		Gnpnat1	>tr|B1H249|B1H249_RAT Gnpnat1 protein OS=Rattus norvegicus GN=Gnpnat1 PE=2 SV=1	20.821	184	13196000	26418000	141910000	197140000	77195000	122030000	9591700	13226000	104590000	175690000	73933000	97753000	12247000	11940000	82459000	101760000	123420000	497660
B1H250	B1H250		RGD1564894	>tr|B1H250|B1H250_RAT Protein RGD1564894 OS=Rattus norvegicus GN=RGD1564894 PE=2 SV=1	33.986	296	97668000	152100000	544220000	680570000	391990000	523600000	106210000	153800000	650380000	1027000000	644980000	591090000	72384000	76223000	455050000	650550000	716480000	685250000
B1H257	B1H257		Loh12cr1	>tr|B1H257|B1H257_RAT Loss of heterozygosity, 12, chromosomal region 1 homolog (Human) OS=Rattus norvegicus GN=Loh12cr1 PE=2 SV=1	22.176	195	0	0	737270	314610	174040	467650	0	0	0	653300	0	0	0	0	0	744170	0	0
B1H261	B1H261		Tysnd1	>tr|B1H261|B1H261_RAT Protein Tysnd1 OS=Rattus norvegicus GN=Tysnd1 PE=2 SV=1	58.986	567	1261500	821240	2944600	8541300	6108600	6679200	101610	377330	5888300	11341000	5873900	5322200	177990	270280	8297600	6789100	4689400	4385500
B1H264	B1H264		Tbc1d17	>tr|B1H264|B1H264_RAT Protein Tbc1d17 OS=Rattus norvegicus GN=Tbc1d17 PE=2 SV=1	72.795	646	288280	318430	2539900	4970000	3298800	5026200	613880	430560	4172400	994740	3297400	2932100	375090	209240	1334200	626470	7509900	4734900
B1H267;M0RA17;F1M5F8	B1H267;M0RA17	Sorting nexin-5	Snx5	>sp|B1H267|SNX5_RAT Sorting nexin-5 OS=Rattus norvegicus GN=Snx5 PE=1 SV=1;>tr|M0RA17|M0RA17_RAT Sorting nexin 5 (Predicted), isoform CRA_a OS=Rattus norvegicus GN=Snx5 PE=4 SV=1	46.793	404	6494600	7484700	54174000	40115000	24199000	30299000	6748100	6190900	40915000	62112000	25215000	28144000	4524400	4349800	40077000	51405000	30163000	42225000
B1H282	B1H282		Colgalt1	>tr|B1H282|B1H282_RAT Glycosyltransferase 25 domain containing 1 OS=Rattus norvegicus GN=Colgalt1 PE=2 SV=1	71.114	617	461260	473130	3203300	4867400	2830000	5167700	510090	381610	2115900	6384900	3420000	3997700	429310	358670	3916200	3967200	3837500	3040300
B1H285;F8WFZ9	B1H285;F8WFZ9	Kelch repeat and BTB domain-containing protein 8	Kbtbd8	>sp|B1H285|KBTB8_RAT Kelch repeat and BTB domain-containing protein 8 OS=Rattus norvegicus GN=Kbtbd8 PE=2 SV=1;>tr|F8WFZ9|F8WFZ9_RAT Kelch repeat and BTB domain-containing protein 8 OS=Rattus norvegicus GN=Kbtbd8 PE=4 SV=1	66.321	575	0	0	1000300	2204800	0	408930	0	0	1623300	484780	685080	929890	0	0	1344800	910900	249100	150960
B1H2A6	B1H2A6		Fxr2	>tr|B1H2A6|B1H2A6_RAT Fxr2 protein OS=Rattus norvegicus GN=Fxr2 PE=2 SV=1	74.374	675	92464	0	476290	534070	0	213690	0	0	839030	627230	0	206080	123710	0	937180	605600	310930	0
B1WBR1;O35254	B1WBR1;O35254	Golgi reassembly-stacking protein 1	Gorasp1	>tr|B1WBR1|B1WBR1_RAT Golgi reassembly-stacking protein 1 OS=Rattus norvegicus GN=Gorasp1 PE=2 SV=1;>sp|O35254|GORS1_RAT Golgi reassembly-stacking protein 1 OS=Rattus norvegicus GN=Gorasp1 PE=1 SV=4	47.052	446	0	0	0	0	1403600	0	0	0	0	0	1179900	1156100	0	0	0	0	0	0
B1WBR6	B1WBR6		Tmem129	>tr|B1WBR6|B1WBR6_RAT Protein LOC688176 OS=Rattus norvegicus GN=LOC688176 PE=2 SV=1	40.475	362	0	0	227040	812900	0	394820	0	0	0	0	117430	130930	0	0	178160	0	93148	159080
B1WBS4	B1WBS4		Vps26b	>tr|B1WBS4|B1WBS4_RAT Protein Vps26b OS=Rattus norvegicus GN=Vps26b PE=2 SV=1	39.124	336	1994700	3387200	12957000	17627000	3533200	10501000	2040700	1512800	10579000	12968000	6684300	8617700	1543000	1325100	14767000	10470000	7662300	10917000
B1WBS6	B1WBS6		Glb1l	>tr|B1WBS6|B1WBS6_RAT Glb1l protein OS=Rattus norvegicus GN=Glb1l PE=2 SV=1	73.261	646	536970	944610	2674100	3811200	1097800	4146500	612530	859200	3851900	5777600	2222300	2231800	417380	386290	2564600	28823	2871900	1376300
B1WBU7	B1WBU7		Tmem50a	>tr|B1WBU7|B1WBU7_RAT Protein Tmem50a OS=Rattus norvegicus GN=Tmem50a PE=2 SV=1	17.393	157	0	0	2506100	4160500	1305800	385230	0	0	308190	5358400	963960	1524400	0	0	1491800	5517500	4075600	0
B1WBV4	B1WBV4		Plekhf2	>tr|B1WBV4|B1WBV4_RAT Pleckstrin homology domain containing, family F (With FYVE domain) member 2 OS=Rattus norvegicus GN=Plekhf2 PE=2 SV=1	27.74	249	0	0	1292400	1077900	1013800	596170	0	0	1326600	2613600	932530	1290200	0	0	2056400	1348600	2640700	724340
B1WBW4	B1WBW4	Armadillo repeat-containing protein 10	Armc10	>sp|B1WBW4|ARM10_RAT Armadillo repeat-containing protein 10 OS=Rattus norvegicus GN=Armc10 PE=2 SV=1	33.421	306	1416900	4105000	11382000	9279800	2883500	7472500	2389500	2943200	6889800	20784000	10949000	9279100	2158200	1232000	12054000	13594000	13919000	12509000
B1WBX6	B1WBX6		Smap2	>tr|B1WBX6|B1WBX6_RAT Protein Smap2 OS=Rattus norvegicus GN=Smap2 PE=2 SV=1	46.493	428	170090	692710	2273900	3358000	1836300	5920300	305770	374020	3229300	3069000	2007800	1774700	651110	290360	6329500	2975400	6149400	886070
B1WBY1	B1WBY1		Cul1	>tr|B1WBY1|B1WBY1_RAT Cul1 protein OS=Rattus norvegicus GN=Cul1 PE=2 SV=1	89.69	776	611510	1244700	9350700	7889700	1907800	4879300	596930	457270	5313700	7691000	3926800	8263800	678830	727060	6903200	5486500	7913400	5099000
B1WBY3	B1WBY3		Alg12	>tr|B1WBY3|B1WBY3_RAT Alg12 protein OS=Rattus norvegicus GN=Alg12 PE=2 SV=1	54.708	488	0	0	185730	619490	0	77779	0	0	165160	597370	96414	196600	0	0	153420	0	194980	169830
B1WBY5	B1WBY5		Dnajc11	>tr|B1WBY5|B1WBY5_RAT DnaJ (Hsp40) homolog, subfamily C, member 11 OS=Rattus norvegicus GN=Dnajc11 PE=2 SV=1	63.204	559	2991400	5008500	19291000	31858000	14394000	23711000	3913800	5180400	11812000	29559000	23301000	14868000	1878000	1547800	25980000	22041000	23674000	25673000
B1WBY7	B1WBY7		Erlin1	>tr|B1WBY7|B1WBY7_RAT ER lipid raft associated 1 OS=Rattus norvegicus GN=Erlin1 PE=2 SV=1	39.266	348	1936800	1903500	14506000	11996000	9170300	5826200	1540600	2050200	4249300	6018600	7683800	7083500	1346400	659020	7308700	8400500	11511000	4643800
B1WBZ6	B1WBZ6		RGD1565685	>tr|B1WBZ6|B1WBZ6_RAT Protein RGD1565685 OS=Rattus norvegicus GN=RGD1565685 PE=2 SV=1	36.708	320	0	208190	465210	0	32525	293350	0	288880	256250	55254	0	325220	161740	244430	654520	495490	556190	486690
B1WBZ7	B1WBZ7		Gpn1	>tr|B1WBZ7|B1WBZ7_RAT LOC688393 protein OS=Rattus norvegicus GN=Gpn1 PE=2 SV=1	41.47	373	0	0	530200	1195400	2303600	0	0	0	0	0	500930	0	0	0	0	0	0	2383300
B1WC02	B1WC02		Ctps	>tr|B1WC02|B1WC02_RAT CTP synthase OS=Rattus norvegicus GN=Ctps1 PE=2 SV=1	66.64	591	212650	229760	1756000	4159200	2065500	1488200	29567	68860	1073000	497520	1171800	585470	186400	221260	2615000	2151000	3711700	2347900
B1WC24	B1WC24		Ctdsp1	>tr|B1WC24|B1WC24_RAT Ctdsp1 protein OS=Rattus norvegicus GN=Ctdsp1 PE=2 SV=1	29.294	261	190060	0	4505400	4255500	2264800	4330100	302290	0	4877500	8724500	3881800	5406100	175220	0	9078600	2454300	4647600	5280400
B1WC26	B1WC26		Nans	>tr|B1WC26|B1WC26_RAT N-acetylneuraminic acid synthase OS=Rattus norvegicus GN=Nans PE=2 SV=1	40.051	359	14507000	24361000	83262000	139590000	93958000	114150000	15031000	23302000	78004000	131680000	86827000	73879000	9108600	13852000	80678000	93577000	87590000	141270000
B1WC33	B1WC33		Cdc42ep4	>tr|B1WC33|B1WC33_RAT CDC42 effector protein (Rho GTPase binding) 4 (Predicted), isoform CRA_a OS=Rattus norvegicus GN=Cdc42ep4 PE=2 SV=1	37.927	350	0	0	579800	956280	615040	464390	0	0	76514	537750	217760	296600	0	0	156900	231350	388720	0
B1WC34	B1WC34		Prkcsh	>tr|B1WC34|B1WC34_RAT Protein Prkcsh OS=Rattus norvegicus GN=Prkcsh PE=2 SV=1	59.218	525	14412000	18669000	77884000	94477000	51327000	95427000	10633000	10765000	47472000	66893000	49991000	66819000	10035000	9629700	79475000	98513000	84248000	44343000
B1WC35	B1WC35		Tmem161a	>tr|B1WC35|B1WC35_RAT Protein Tmem161a OS=Rattus norvegicus GN=Tmem161a PE=2 SV=1	54.142	479	0	0	329060	581500	190010	454760	0	0	416650	155860	118310	0	0	0	397890	0	259890	5614.7
B1WC40	B1WC40	Nuclear cap-binding protein subunit 2	Ncbp2	>sp|B1WC40|NCBP2_RAT Nuclear cap-binding protein subunit 2 OS=Rattus norvegicus GN=Ncbp2 PE=2 SV=1	18.017	156	699320	1327400	2545800	2087200	4284700	3451500	831890	1277900	1507700	3822200	3778000	5795200	952880	735220	169870	4523600	5215100	504540
B1WC49	B1WC49		Api5	>tr|B1WC49|B1WC49_RAT Api5 protein OS=Rattus norvegicus GN=Api5 PE=2 SV=1	56.784	504	1902900	2755200	14560000	36072000	11502000	30801000	1302200	2849700	14958000	35065000	13127000	16596000	1823900	1344400	23650000	21433000	24288000	14644000
B1WC56;D3ZVC6	B1WC56		LOC100910210	>tr|B1WC56|B1WC56_RAT Nola2 protein OS=Rattus norvegicus GN=LOC100910210 PE=2 SV=1	17.292	153	615790	1646100	3251500	1311000	1318000	2451900	756530	1053600	1626300	2047400	839020	3087000	820580	220060	0	1213900	653640	0
B1WC57	B1WC57		Hspb11	>tr|B1WC57|B1WC57_RAT Hspb11 protein OS=Rattus norvegicus GN=Hspb11 PE=2 SV=1	16.3	143	377750	430090	2340000	5421700	4369500	3700800	0	209580	1269600	6427400	2446800	3709000	339720	219950	0	3972000	3149200	247390
B1WC61	B1WC61		Acad9	>tr|B1WC61|B1WC61_RAT Acad9 protein OS=Rattus norvegicus GN=Acad9 PE=2 SV=1	68.842	625	15801000	28962000	109850000	130170000	109530000	144070000	21854000	28857000	143510000	178050000	154870000	142800000	15587000	14276000	171880000	155580000	160730000	149340000
B1WC84	B1WC84		Cnpy4	>tr|B1WC84|B1WC84_RAT Canopy 4 homolog (Zebrafish) OS=Rattus norvegicus GN=Cnpy4 PE=2 SV=1	28.384	247	412350	1451700	8120300	8451700	10193000	6936400	391640	241180	3307300	8982300	4455300	4708800	211960	693430	7931100	975990	5813300	2631000
B2GUV5;Q8R2H0	B2GUV5		Atp6v1g1	>tr|B2GUV5|B2GUV5_RAT ATPase, H transporting, lysosomal V1 subunit G1 OS=Rattus norvegicus GN=Atp6v1g1 PE=2 SV=1	13.71	118	4265900	7686400	23087000	80993000	65686000	66572000	4962500	5092000	35809000	76716000	26801000	53620000	5306900	1397300	39454000	53962000	32238000	26544000
B2GUV7;M0R7Z0	B2GUV7;M0R7Z0	Eukaryotic translation initiation factor 5B	Eif5b	>sp|B2GUV7|IF2P_RAT Eukaryotic translation initiation factor 5B OS=Rattus norvegicus GN=Eif5b PE=1 SV=1;>tr|M0R7Z0|M0R7Z0_RAT Uncharacterized protein OS=Rattus norvegicus PE=4 SV=1	137.68	1216	316260	618900	5779000	9407700	5604800	6881000	513530	440200	4368800	8457900	3799700	3802100	399480	480820	8234700	9324100	9188600	5930900
B2GUX5	B2GUX5		Nt5c3a	>tr|B2GUX5|B2GUX5_RAT 5-nucleotidase, cytosolic III OS=Rattus norvegicus GN=Nt5c3a PE=2 SV=1	33.81	297	573770	800240	4275600	3410800	1496000	5044100	368160	760310	3481800	5226900	5372000	2777600	374690	421630	4831800	4694000	6450600	5791600
B2GUX7	B2GUX7		Creg1	>tr|B2GUX7|B2GUX7_RAT Cellular repressor of E1A-stimulated genes (Predicted), isoform CRA_b OS=Rattus norvegicus GN=Creg1 PE=2 SV=1	24.387	220	2862300	7312800	34045000	11369000	18071000	40154000	5381200	8570100	41343000	58484000	40043000	43010000	4264600	3169100	29947000	17006000	40892000	2694300
B2GUY0	B2GUY0	Endoplasmic reticulum mannosyl-oligosaccharide 1,2-alpha-mannosidase	Man1b1	>sp|B2GUY0|MA1B1_RAT Endoplasmic reticulum mannosyl-oligosaccharide 1,2-alpha-mannosidase OS=Rattus norvegicus GN=Man1b1 PE=2 SV=2	74.894	657	0	4994.4	0	0	1057500	816760	27859	221360	0	0	700780	517860	150640	74383	817880	1070400	896040	432950
B2GUY2	B2GUY2	Transferrin receptor protein 2	Tfr2	>sp|B2GUY2|TFR2_RAT Transferrin receptor protein 2 OS=Rattus norvegicus GN=Tfr2 PE=2 SV=1	88.327	798	1036000	2177300	6473200	6552800	7225400	6627700	950620	866050	4083300	8338500	3180900	3843300	1110800	553700	6336500	8442900	14613000	5421700
B2GUZ3	B2GUZ3		Mthfd1l	>tr|B2GUZ3|B2GUZ3_RAT Mthfd1l protein OS=Rattus norvegicus GN=Mthfd1l PE=2 SV=1	105.84	977	19073	26546	276250	644910	235320	393990	9491.2	11936	212390	87032	218910	353720	13117	6905.9	12848	125110	428170	145600
B2GUZ4	B2GUZ4		Pex26	>tr|B2GUZ4|B2GUZ4_RAT Peroxisome biogenesis factor 26 OS=Rattus norvegicus GN=Pex26 PE=2 SV=1	33.16	301	138500	241370	1374600	2781800	0	3395400	0	104850	528190	1768700	2711800	3482400	0	79868	1802800	1154000	2806900	4505700
B2GUZ5	B2GUZ5	F-actin-capping protein subunit alpha-1	Capza1	>sp|B2GUZ5|CAZA1_RAT F-actin-capping protein subunit alpha-1 OS=Rattus norvegicus GN=Capza1 PE=1 SV=1	32.909	286	6812100	12776000	35904000	53334000	34263000	38336000	4563500	9438200	32101000	45069000	29210000	25240000	6083300	5392400	25860000	21755000	44376000	32347000
B2GUZ6	B2GUZ6		Rtn4ip1	>tr|B2GUZ6|B2GUZ6_RAT Protein Rtn4ip1 OS=Rattus norvegicus GN=Rtn4ip1 PE=2 SV=1	43.605	396	1484700	2487800	15570000	21789000	12132000	13096000	2885800	2277300	17194000	26200000	13950000	11898000	629210	1069300	21240000	20976000	17993000	16582000
B2GUZ7	B2GUZ7		Tbcc	>tr|B2GUZ7|B2GUZ7_RAT Protein Tbcc OS=Rattus norvegicus GN=Tbcc PE=2 SV=1	38.076	340	222840	343260	4761400	6639400	2095100	4975200	516210	635250	3354600	5358500	3123000	5328100	821270	496780	7386900	6069900	2266800	4892200
B2GUZ9	B2GUZ9		Fam49b	>tr|B2GUZ9|B2GUZ9_RAT Fam49b protein OS=Rattus norvegicus GN=Fam49b PE=2 SV=1	36.776	324	839490	1225400	2634200	2477400	1064600	3379500	1034800	880910	7798700	4179300	2309600	4148800	487300	525350	3156500	1658300	1877100	1006300
B2GV01;D3ZPH3	B2GV01		Mta2	>tr|B2GV01|B2GV01_RAT Metastasis-associated gene family, member 2 OS=Rattus norvegicus GN=Mta2 PE=2 SV=1	74.959	668	323530	410520	638080	2024200	989860	1521700	222020	224980	724990	1776000	952320	1424300	508980	264560	1075600	1216200	1500300	486130
B2GV09	B2GV09		Llgl2	>tr|B2GV09|B2GV09_RAT Llgl2 protein OS=Rattus norvegicus GN=Llgl2 PE=2 SV=1	114.02	1026	386750	597510	3466700	7692100	1506300	5018500	263940	489600	3495000	7619500	3936500	4557400	426220	128820	1627600	4389100	5725000	3148100
B2GV14	B2GV14		Txlna	>tr|B2GV14|B2GV14_RAT Protein Txlna OS=Rattus norvegicus GN=Txlna PE=2 SV=1	62.566	557	0	15830	0	0	768360	0	0	0	0	0	0	0	34467	37921	490410	137650	0	849370
B2GV15	B2GV15		Dbt	>tr|B2GV15|B2GV15_RAT Dihydrolipoamide branched chain transacylase E2 OS=Rattus norvegicus GN=Dbt PE=2 SV=1	53.273	482	25006000	24331000	164580000	247950000	89765000	163990000	32903000	28183000	133210000	322950000	153320000	138120000	16362000	15671000	205050000	204520000	160110000	121290000
B2GV24	B2GV24	E3 UFM1-protein ligase 1	Ufl1	>sp|B2GV24|UFL1_RAT E3 UFM1-protein ligase 1 OS=Rattus norvegicus GN=Ufl1 PE=2 SV=1	89.584	793	1415300	2844500	17154000	21890000	15235000	19931000	1547100	1887700	8749500	23137000	12638000	17453000	1294200	914410	13786000	20590000	16940000	21855000
B2GV35	B2GV35		B3gat3	>tr|B2GV35|B2GV35_RAT B3gat3 protein OS=Rattus norvegicus GN=B3gat3 PE=2 SV=1	37.072	335	64989	58684	1286600	504900	149630	559430	60305	69200	245910	496890	0	203470	61741	42677	347680	397510	0	456020
B2GV37	B2GV37		Zfp593	>tr|B2GV37|B2GV37_RAT Protein Zfp593 OS=Rattus norvegicus GN=Zfp593 PE=2 SV=1	15.293	134	0	0	0	0	0	918350	0	0	0	0	546180	715780	0	0	0	0	0	0
B2GV38	B2GV38	Ubiquitin-like protein 4A	Ubl4a	>sp|B2GV38|UBL4A_RAT Ubiquitin-like protein 4A OS=Rattus norvegicus GN=Ubl4a PE=2 SV=1	17.79	157	974230	2250300	12986000	29045000	18935000	11218000	336570	1463800	13603000	21460000	11061000	12580000	1646600	2341300	13269000	17170000	18999000	223940
B2GV52	B2GV52	Biogenesis of lysosome-related organelles complex 1 subunit 5	Bloc1s5	>sp|B2GV52|BL1S5_RAT Biogenesis of lysosome-related organelles complex 1 subunit 5 OS=Rattus norvegicus GN=Bloc1s5 PE=1 SV=1	21.539	187	0	0	302720	108080	92238	288610	0	0	213240	244790	204660	241280	0	0	0	324230	473520	0
B2GV53	B2GV53		Slc25a32	>tr|B2GV53|B2GV53_RAT Protein Slc25a32 OS=Rattus norvegicus GN=Slc25a32 PE=2 SV=1	35.045	316	888980	717110	3248700	9368500	716780	2522300	365320	1376000	5019900	9150800	4333400	5593500	803620	350310	7624800	4085200	2153800	5237000
B2GV54	B2GV54	Neutral cholesterol ester hydrolase 1	Nceh1	>sp|B2GV54|NCEH1_RAT Neutral cholesterol ester hydrolase 1 OS=Rattus norvegicus GN=Nceh1 PE=2 SV=1	45.821	408	602270	0	4682900	7214500	2369100	6977300	537380	363090	2824600	7286000	5115800	5988700	310870	132770	4411900	4588700	6421800	5587200
B2GV57	B2GV57		Cars2	>tr|B2GV57|B2GV57_RAT Protein Cars2 OS=Rattus norvegicus GN=Cars2 PE=2 SV=1	60.917	550	2134700	2060400	5617800	8473700	7337100	12084000	1793800	2938500	9796700	13531000	11043000	9056900	953760	1196400	12367000	7522200	10902000	8706600
B2GV58	B2GV58		Lsm14a	>tr|B2GV58|B2GV58_RAT Lsm14a protein OS=Rattus norvegicus GN=Lsm14a PE=2 SV=1	51.226	468	0	0	567190	609030	0	1279000	0	0	459570	365150	167190	453480	0	0	556220	178780	694700	0
B2GV62	B2GV62		Mrpl20	>tr|B2GV62|B2GV62_RAT Mitochondrial ribosomal protein L20 OS=Rattus norvegicus GN=Mrpl20 PE=2 SV=1	17.525	149	65484	686480	846450	7009100	5824500	7754500	298540	177230	2005200	5869000	1045700	6480400	477150	153140	394960	3430200	3893900	385780
B2GV65;D3ZU87	B2GV65;D3ZU87		Higd2a;Higd2al1	>tr|B2GV65|B2GV65_RAT HIG1 domain family, member 2A OS=Rattus norvegicus GN=Higd2a PE=2 SV=1;>tr|D3ZU87|D3ZU87_RAT Protein Higd2al1 OS=Rattus norvegicus GN=Higd2al1 PE=4 SV=1	11.43	106	1410000	1998500	11421000	25218000	26277000	17372000	1416400	872960	3586200	38818000	19292000	14393000	1973600	534430	17512000	13820000	47533000	12076000
B2GV71	B2GV71	NADH dehydrogenase [ubiquinone] 1 alpha subcomplex assembly factor 5	Ndufaf5	>sp|B2GV71|NDUF5_RAT NADH dehydrogenase [ubiquinone] 1 alpha subcomplex assembly factor 5 OS=Rattus norvegicus GN=Ndufaf5 PE=2 SV=1	38.229	343	222550	0	2312100	462180	4235300	0	0	0	885790	473850	2669500	2052700	0	0	696750	1136800	0	0
B2GV72	B2GV72		Cbr3	>tr|B2GV72|B2GV72_RAT Carbonyl reductase 3 OS=Rattus norvegicus GN=Cbr3 PE=2 SV=1	30.841	277	0	0	636440	1627000	567990	355970	0	0	1079300	1786800	354370	409270	0	0	1483000	1170200	561830	428300
B2GV73	B2GV73		Arpc3	>tr|B2GV73|B2GV73_RAT Actin-related protein 2/3 complex subunit 3 OS=Rattus norvegicus GN=Arpc3 PE=2 SV=1	20.535	178	13537000	21326000	113930000	138150000	52809000	65241000	11627000	13759000	56417000	156780000	71719000	86038000	12893000	10143000	117020000	97265000	103820000	978200
B2GV74	B2GV74		Klc2	>tr|B2GV74|B2GV74_RAT Kinesin light chain 2 (Predicted), isoform CRA_b OS=Rattus norvegicus GN=Klc2 PE=1 SV=1	68.61	622	0	0	149790	114220	0	567210	0	0	348560	386160	0	0	0	0	37858	69603	45456	68299
B2GV79;M0R416;Q8VD52	B2GV79;M0R416;Q8VD52	Pyridoxal phosphate phosphatase	Pdxp	>tr|B2GV79|B2GV79_RAT Pdxp protein OS=Rattus norvegicus GN=Pdxp PE=2 SV=1;>tr|M0R416|M0R416_RAT Pyridoxal phosphate phosphatase OS=Rattus norvegicus GN=Pdxp PE=4 SV=1;>sp|Q8VD52|PLPP_RAT Pyridoxal phosphate phosphatase OS=Rattus norvegicus GN=Pdxp PE=1 SV=	31.424	292	155900	198090	1952300	2459800	854360	4204000	0	169430	3302500	2924000	1727900	2070700	129330	110520	523260	0	1802300	1065700
B2GV94	B2GV94		Fam134c	>tr|B2GV94|B2GV94_RAT Fam134c protein OS=Rattus norvegicus GN=Fam134c PE=2 SV=1	51.528	466	154670	259570	2592200	2018900	1988700	2065900	201910	177540	1554100	2059300	1292100	1543700	122150	337440	1231400	3070800	1132800	3278800
B2GV96	B2GV96		Ccdc115	>tr|B2GV96|B2GV96_RAT Coiled-coil domain containing 115 OS=Rattus norvegicus GN=Ccdc115 PE=2 SV=1	19.814	180	0	186480	1149000	796720	352510	716940	90382	0	947980	1114300	688420	812360	117420	0	441520	459500	941120	116810
B2GV97	B2GV97		LOC679383	>tr|B2GV97|B2GV97_RAT LOC679383 protein OS=Rattus norvegicus GN=Sepsecs PE=2 SV=1	55.331	504	3815100	5428300	30641000	26332000	22076000	23054000	3968200	5692200	21534000	29283000	10320000	7317100	4522600	4642800	26449000	31190000	24125000	22453000
B2GVB9	B2GVB9		Fermt3	>tr|B2GVB9|B2GVB9_RAT Fermt3 protein OS=Rattus norvegicus GN=Fermt3 PE=2 SV=1	75.622	665	551990	755710	3361300	10477000	9687500	5870300	510950	572190	6344700	7326700	4795900	4356300	353600	187590	3496100	4903500	6874900	3085600
B2RYB1	B2RYB1		Txndc11	>tr|B2RYB1|B2RYB1_RAT Protein Txndc11 OS=Rattus norvegicus GN=Txndc11 PE=2 SV=1	105.91	947	0	0	39398	82453	0	62336	0	0	0	0	28011	0	0	0	0	0	142840	65763
B2RYB2	B2RYB2		RGD1306215	>tr|B2RYB2|B2RYB2_RAT Protein RGD1306215 OS=Rattus norvegicus GN=RGD1306215 PE=2 SV=1	11.448	108	0	0	534330	0	0	325780	0	0	0	0	0	0	0	0	0	4920800	2179600	0
B2RYB3	B2RYB3		Srrm1	>tr|B2RYB3|B2RYB3_RAT Protein Srrm1 OS=Rattus norvegicus GN=Srrm1 PE=2 SV=1	102.43	908	0	0	186500	0	11772	17074	0	0	197860	328770	58856	31557	0	0	113670	0	189800	22445
B2RYC4	B2RYC4		LOC100910831	>tr|B2RYC4|B2RYC4_RAT Protein Syvn1 OS=Rattus norvegicus GN=LOC100910831 PE=2 SV=1	66.872	608	0	0	365920	455850	140490	608400	0	0	197590	791220	182190	523540	0	0	139210	664330	1144500	35242
B2RYC7	B2RYC7		Tec	>tr|B2RYC7|B2RYC7_RAT Protein Tec OS=Rattus norvegicus GN=Tec PE=2 SV=1	73.341	629	0	0	329990	426760	0	193710	0	0	328180	430360	0	119740	0	0	294270	144830	38368	0
B2RYC9	B2RYC9		Gba	>tr|B2RYC9|B2RYC9_RAT Glucosylceramidase OS=Rattus norvegicus GN=Gba PE=2 SV=1	57.491	515	601850	1190000	3443500	7095600	2784500	1135700	370180	510310	8594800	5289100	5775700	7861200	206050	282690	4173200	5886700	38630000	21497000
B2RYD0	B2RYD0		Ube2g2	>tr|B2RYD0|B2RYD0_RAT Protein Ube2g2 OS=Rattus norvegicus GN=Ube2g2 PE=2 SV=1	18.566	165	500520	2196700	4253200	6665500	6810800	6624200	0	811870	4396800	6576900	2197100	9114500	1014700	1230400	4757300	10830000	9119400	140590
B2RYD7	B2RYD7		Stt3b	>tr|B2RYD7|B2RYD7_RAT Protein Stt3b OS=Rattus norvegicus GN=Stt3b PE=2 SV=1	93.435	824	3911700	5946700	38430000	57393000	5977900	44458000	3629000	3960300	33550000	35186000	20918000	22426000	3217400	896250	34562000	33133000	31571000	13354000
B2RYE6	B2RYE6			>tr|B2RYE6|B2RYE6_RAT Uncharacterized protein OS=Rattus norvegicus PE=2 SV=1	20.739	185	0	0	859280	1446800	2201600	2274900	0	0	48537	1174100	524350	1107900	0	0	1469800	1082800	1200300	787150
B2RYF6	B2RYF6		Clptm1	>tr|B2RYF6|B2RYF6_RAT Cleft lip and palate associated transmembrane protein 1 OS=Rattus norvegicus GN=Clptm1 PE=2 SV=1	75.276	664	367360	630860	6663700	11345000	1795300	10707000	344810	429330	4042600	9264000	5657800	9319700	593570	219460	10911000	16381000	14370000	5986600
B2RYF7;F1LSU9	B2RYF7;F1LSU9	WAS protein family homolog 1	Wash1;Wash	>sp|B2RYF7|WASH1_RAT WAS protein family homolog 1 OS=Rattus norvegicus GN=Wash1 PE=2 SV=1;>tr|F1LSU9|F1LSU9_RAT Protein Wash (Fragment) OS=Rattus norvegicus GN=Wash PE=4 SV=2	51.326	475	232480	647970	2707700	2530100	1298500	2989800	403030	330620	388760	1998900	1937500	1527500	290700	92764	3887300	4117500	1904800	1224100
B2RYG6	B2RYG6	Ubiquitin thioesterase OTUB1	Otub1	>sp|B2RYG6|OTUB1_RAT Ubiquitin thioesterase OTUB1 OS=Rattus norvegicus GN=Otub1 PE=1 SV=1	31.27	271	14077000	22818000	86849000	132930000	18846000	88499000	14215000	17885000	87766000	140610000	70424000	100770000	11924000	15158000	123310000	86598000	107120000	109650000
B2RYI0	B2RYI0	WD repeat-containing protein 91	Wdr91	>sp|B2RYI0|WDR91_RAT WD repeat-containing protein 91 OS=Rattus norvegicus GN=Wdr91 PE=2 SV=1	83.145	747	0	49555	381150	710470	407680	277130	0	43224	382220	827840	388140	711930	0	20843	568840	800730	363780	232180
B2RYI2;D3ZVL3	B2RYI2	Signal recognition particle subunit SRP68	Srp68	>tr|B2RYI2|B2RYI2_RAT Signal recognition particle subunit SRP68 OS=Rattus norvegicus GN=Srp68 PE=2 SV=1	70.491	625	2483100	3022800	17647000	21732000	15407000	13758000	1841600	1711000	13622000	16038000	14290000	14342000	1924400	1622400	15283000	10718000	20090000	17186000
B2RYJ1	B2RYJ1		Anapc2	>tr|B2RYJ1|B2RYJ1_RAT Anapc2 protein OS=Rattus norvegicus GN=Anapc2 PE=2 SV=1	95.372	836	127310	0	950660	807090	130750	1416200	212190	158710	838960	928590	354820	567020	201260	169990	654880	799520	2118300	179700
B2RYJ3	B2RYJ3		Cul4a	>tr|B2RYJ3|B2RYJ3_RAT Protein Cul4a OS=Rattus norvegicus GN=Cul4a PE=2 SV=1	87.773	759	1184400	1799200	11997000	14951000	6536700	13601000	1187800	867460	7524700	20814000	10772000	13735000	1057800	1651500	18619000	14662000	18437000	9226000
B2RYJ4	B2RYJ4	L-aminoadipate-semialdehyde dehydrogenase-phosphopantetheinyl transferase	Aasdhppt	>sp|B2RYJ4|ADPPT_RAT L-aminoadipate-semialdehyde dehydrogenase-phosphopantetheinyl transferase OS=Rattus norvegicus GN=Aasdhppt PE=2 SV=1	35.816	309	272690	310470	382440	439790	1926100	0	171320	331380	1674300	447130	2181800	899490	309250	390920	151500000	3974500	4007000	2495700
B2RYJ7	B2RYJ7		Actr1b	>tr|B2RYJ7|B2RYJ7_RAT ARP1 actin-related protein 1 homolog B (Yeast) OS=Rattus norvegicus GN=Actr1b PE=2 SV=1	42.281	376	5594700	9475600	47660000	31645000	43521000	29529000	6643600	9682100	27502000	24920000	30982000	37194000	5570300	6640200	38692000	26829000	47960000	41108000
B2RYJ8;G3V8M2;B2RYD2-2;F1LP81;B2RYD2	B2RYJ8;G3V8M2	Epithelial splicing regulatory protein 2	Esrp2	>sp|B2RYJ8|ESRP2_RAT Epithelial splicing regulatory protein 2 OS=Rattus norvegicus GN=Esrp2 PE=2 SV=1;>tr|G3V8M2|G3V8M2_RAT Epithelial-splicing regulatory protein 2 OS=Rattus norvegicus GN=Esrp2 PE=4 SV=1	77.24	716	499810	792310	5127600	4072900	2644000	1205800	54763	428310	2168300	4047300	1816200	2184400	281750	599780	4346000	3054900	3004900	4355500
B2RYL7	B2RYL7		Dis3	>tr|B2RYL7|B2RYL7_RAT Dis3 protein OS=Rattus norvegicus GN=Dis3 PE=2 SV=1	108.75	957	81351	226210	373930	417620	68161	305280	69517	33919	371600	204060	80560	325840	149270	64794	503560	495300	659430	27713
B2RYM2	B2RYM2		Wipi1	>tr|B2RYM2|B2RYM2_RAT Protein Wipi1 OS=Rattus norvegicus GN=Wipi1 PE=2 SV=1	48.727	446	0	0	242200	338760	0	54269	0	0	146430	379170	172300	103330	0	0	0	0	127580	0
B2RYM3;CON__Q0VCM5	B2RYM3		Itih1	>tr|B2RYM3|B2RYM3_RAT Inter-alpha trypsin inhibitor, heavy chain 1 (Predicted), isoform CRA_a OS=Rattus norvegicus GN=Itih1 PE=2 SV=1	100.59	904	3235300	4825200	29217000	37249000	14535000	27005000	7240200	3708900	32545000	27609000	12558000	14168000	2094200	2288100	21886000	28243000	13884000	8855400
B2RYM5	B2RYM5	Lys-63-specific deubiquitinase BRCC36	Brcc3	>sp|B2RYM5|BRCC3_RAT Lys-63-specific deubiquitinase BRCC36 OS=Rattus norvegicus GN=Brcc3 PE=2 SV=1	33.015	291	2391800	3969200	14605000	20307000	3448300	17387000	2113900	2957900	10036000	41693000	8817700	11432000	2096900	1768000	12663000	27129000	9115800	14592000
B2RYM6	B2RYM6		Zc3hc1	>tr|B2RYM6|B2RYM6_RAT Protein Zc3hc1 OS=Rattus norvegicus GN=Zc3hc1 PE=2 SV=1	55.324	501	0	0	308020	381990	105880	0	0	0	0	428820	0	0	0	0	0	368750	0	153360
B2RYM8	B2RYM8		Fam210b	>tr|B2RYM8|B2RYM8_RAT Protein Fam210b OS=Rattus norvegicus GN=Fam210b PE=2 SV=1	20.157	190	616340	1553500	21518000	27226000	6713200	43763000	1737700	830440	14270000	28109000	11461000	23494000	1135000	0	10699000	32300000	34393000	368000
B2RYN1	B2RYN1		Fn3krp	>tr|B2RYN1|B2RYN1_RAT Fructosamine-3-kinase-related protein OS=Rattus norvegicus GN=Fn3krp PE=2 SV=1	34.169	309	926820	1153900	4355900	4518400	2738500	4775000	101030	1003700	3468600	726810	5638300	5446000	160470	549690	4735500	2135900	11285000	6007200
B2RYN3	B2RYN3		Eef1e1	>tr|B2RYN3|B2RYN3_RAT Eukaryotic translation elongation factor 1 epsilon 1 OS=Rattus norvegicus GN=Eef1e1 PE=2 SV=1	19.842	174	1733300	2512300	10996000	17140000	7213100	11083000	926480	1275800	4222700	11677000	5293500	9074700	1221800	1011300	7289800	10315000	14542000	3342900
B2RYP0	B2RYP0		Rhoc	>tr|B2RYP0|B2RYP0_RAT Protein Rhoc OS=Rattus norvegicus GN=Rhoc PE=2 SV=1	22.036	193	2443300	4141300	7193400	8739200	6518800	5377300	3980300	3746600	5126200	7300900	495840	6902000	718250	651970	0	4914100	5556000	224650
B2RYP3	B2RYP3		Fam91a1	>tr|B2RYP3|B2RYP3_RAT Fam91a1 protein OS=Rattus norvegicus GN=Fam91a1 PE=2 SV=1	93.573	838	100270	190820	3227800	1827000	1022700	1732100	120310	42895	1343500	1553500	601870	1053400	141830	145720	2809000	2119500	1459300	1070700
B2RYP4	B2RYP4		Snx2	>tr|B2RYP4|B2RYP4_RAT Protein Snx2 OS=Rattus norvegicus GN=Snx2 PE=2 SV=1	58.53	519	4523400	5666400	32197000	42081000	19579000	28192000	5193000	5497800	33507000	41183000	18810000	19854000	3337900	3292900	38297000	41730000	18768000	14643000
B2RYP6	B2RYP6		Luc7l2	>tr|B2RYP6|B2RYP6_RAT LUC7-like 2 (S. cerevisiae) OS=Rattus norvegicus GN=Luc7l2 PE=2 SV=1	46.582	392	211430	835310	3059100	2712800	0	822000	108670	512500	3722900	1491100	1131300	501310	189920	367010	2682800	460820	1068400	2164200
B2RYQ2	B2RYQ2		Ppp2r4	>tr|B2RYQ2|B2RYQ2_RAT Protein Ppp2r4 OS=Rattus norvegicus GN=Ppp2r4 PE=2 SV=1	36.617	323	4473500	5731700	22279000	8063500	14913000	34588000	2593700	5337800	7286300	9136300	12283000	12684000	2211900	4697800	48986000	13274000	18941000	16490000
B2RYS2	B2RYS2	Cytochrome b-c1 complex subunit 7	Uqcrb	>tr|B2RYS2|B2RYS2_RAT Cytochrome b-c1 complex subunit 7 OS=Rattus norvegicus GN=Uqcrb PE=2 SV=1	13.558	111	42344000	63311000	314890000	575580000	488170000	449050000	35915000	99339000	245930000	999110000	387580000	390350000	76838000	23881000	604430000	636550000	460120000	129470000
B2RYS8	B2RYS8		Ndufb8	>tr|B2RYS8|B2RYS8_RAT NADH dehydrogenase (Ubiquinone) 1 beta subcomplex 8 OS=Rattus norvegicus GN=Ndufb8 PE=2 SV=1	21.959	186	10344000	15403000	101990000	102270000	134670000	105960000	12812000	17623000	83324000	220880000	111090000	142300000	14424000	9417000	89389000	111810000	166460000	49605000
B2RYS9	B2RYS9		Trmt112	>tr|B2RYS9|B2RYS9_RAT Protein Trmt112 OS=Rattus norvegicus GN=Trmt112 PE=2 SV=1	14.127	125	1122600	1965600	12246000	15846000	9712000	20501000	818610	1355100	10150000	15771000	8298100	2484700	2019100	1446300	26994000	17791000	4871700	9303500
B2RYT0;M0R3S1	B2RYT0;M0R3S1		Mrps21;LOC100911433	>tr|B2RYT0|B2RYT0_RAT Mitochondrial ribosomal protein S21 (Predicted), isoform CRA_a OS=Rattus norvegicus GN=Mrps21 PE=2 SV=1;>tr|M0R3S1|M0R3S1_RAT Protein LOC100911433 OS=Rattus norvegicus GN=LOC100911433 PE=4 SV=1	10.6	87	1823700	1843100	9397600	16001000	25350000	14226000	2180600	1928900	6147400	24802000	6604300	9079000	596560	835940	12135000	10617000	14062000	2136900
B2RYT4	B2RYT4		Mrps14	>tr|B2RYT4|B2RYT4_RAT Mitochondrial ribosomal protein S14 OS=Rattus norvegicus GN=Mrps14 PE=2 SV=1	14.924	128	577670	1048700	3103100	13610000	11826000	9219700	130810	725140	4507300	14193000	5520000	6264400	1038500	589910	8497200	7397300	7276700	865680
B2RYT7	B2RYT7		Hdhd3	>tr|B2RYT7|B2RYT7_RAT Haloacid dehalogenase-like hydrolase domain containing 3 OS=Rattus norvegicus GN=Hdhd3 PE=2 SV=1	27.794	251	32426000	108820000	431790000	465390000	143820000	342370000	54240000	55831000	328520000	635680000	277470000	344770000	28570000	26189000	371470000	304660000	278770000	397060000
B2RYT9;D4A601	B2RYT9	Translational activator of cytochrome c oxidase 1	Taco1	>sp|B2RYT9|TACO1_RAT Translational activator of cytochrome c oxidase 1 OS=Rattus norvegicus GN=Taco1 PE=2 SV=1	32.754	295	638220	2700200	10667000	8646300	586460	6663800	1734600	2263800	12845000	27278000	12493000	16274000	1512100	1475800	11197000	9403000	15492000	6065500
B2RYU0	B2RYU0		Ndufb2	>tr|B2RYU0|B2RYU0_RAT NADH dehydrogenase (Ubiquinone) 1 beta subcomplex, 2 (Predicted), isoform CRA_b OS=Rattus norvegicus GN=Ndufb2 PE=2 SV=1	11.842	105	0	0	0	0	0	9484400	0	0	0	0	3980000	460230	0	0	0	0	16299000	0
B2RYU6	B2RYU6	Trafficking protein particle complex subunit 2-like protein	Trappc2l	>sp|B2RYU6|TPC2L_RAT Trafficking protein particle complex subunit 2-like protein OS=Rattus norvegicus GN=Trappc2l PE=2 SV=1	16.031	139	412260	268100	1055300	5985600	1806600	4343800	427900	210290	1652300	2774700	1761500	2903700	506790	162470	3448700	3011700	4390100	57586
B2RYU7	B2RYU7		Cbx5	>tr|B2RYU7|B2RYU7_RAT Cbx5 protein OS=Rattus norvegicus GN=Cbx5 PE=2 SV=1	22.186	191	0	0	111040	2739600	2568200	2442000	0	0	0	0	1243600	747450	0	0	473640	165030	2773400	41156
B2RYU8;G3V950	B2RYU8;G3V950	LYR motif-containing protein 1	Lyrm1	>sp|B2RYU8|LYRM1_RAT LYR motif-containing protein 1 OS=Rattus norvegicus GN=Lyrm1 PE=2 SV=1;>tr|G3V950|G3V950_RAT LYR motif-containing protein 1 OS=Rattus norvegicus GN=Lyrm1 PE=4 SV=1	14.258	122	79832	245190	0	3165600	1227700	230160	78139	160000	629440	1458900	662840	1179600	304320	0	1031400	691170	1072100	1095400
B2RYV0	B2RYV0		Dnajc30	>tr|B2RYV0|B2RYV0_RAT DnaJ (Hsp40) homolog, subfamily C, member 30 OS=Rattus norvegicus GN=Dnajc30 PE=2 SV=1	24.923	219	0	0	1470100	2160900	2098300	780740	0	0	2506100	4316200	18643000	30354000	0	0	2173400	1671900	24872000	1553800
B2RYW3	B2RYW3		Ndufb9	>tr|B2RYW3|B2RYW3_RAT NADH dehydrogenase (Ubiquinone) 1 beta subcomplex, 9 OS=Rattus norvegicus GN=Ndufb9 PE=2 SV=1	21.892	179	18680000	36487000	146400000	183270000	120730000	158310000	25045000	32773000	138770000	369440000	154410000	207690000	20099000	15534000	182610000	189910000	218470000	7654300
B2RYW4	B2RYW4		Mrpl53	>tr|B2RYW4|B2RYW4_RAT Mitochondrial ribosomal protein L53 OS=Rattus norvegicus GN=Mrpl53 PE=2 SV=1	12.735	119	2699300	4779900	11921000	27225000	15437000	12551000	2865000	2518100	13221000	29584000	12283000	10841000	3057600	2502600	10530000	22957000	14185000	12030000
B2RYW7	B2RYW7		Srp14	>tr|B2RYW7|B2RYW7_RAT Protein Srp14 OS=Rattus norvegicus GN=Srp14 PE=2 SV=1	12.51	110	1668500	6021500	24335000	24015000	38322000	51836000	4249800	4020400	6481500	23424000	21657000	31940000	5527200	404600	33975000	27877000	70242000	14970000
B2RYW8	B2RYW8	Mitochondrial inner membrane organizing system protein 1	Minos1	>sp|B2RYW8|MIC10_RAT MICOS complex subunit Mic10 OS=Rattus norvegicus GN=Minos1 PE=3 SV=1	8.5498	76	0	0	456600	38692000	0	1357500	0	0	348780	473090	2928900	1461100	0	0	2043000	233720	2724200	0
B2RYW9	B2RYW9	Fumarylacetoacetate hydrolase domain-containing protein 2	Fahd2	>sp|B2RYW9|FAHD2_RAT Fumarylacetoacetate hydrolase domain-containing protein 2 OS=Rattus norvegicus GN=Fahd2 PE=1 SV=1	34.581	313	23378000	35778000	158300000	122870000	63434000	107770000	24221000	32556000	173840000	221800000	122320000	139260000	21882000	12181000	165200000	126530000	135800000	148000000
B2RYX0;M0R9L0	B2RYX0;M0R9L0		Naca	>tr|B2RYX0|B2RYX0_RAT Naca protein OS=Rattus norvegicus GN=Naca PE=2 SV=1;>tr|M0R9L0|M0R9L0_RAT Protein Naca OS=Rattus norvegicus GN=Naca PE=4 SV=1	23.384	215	67473000	105780000	501550000	573420000	78332000	590330000	57426000	47306000	311170000	581780000	324650000	380160000	71071000	42981000	567490000	625790000	638410000	541750000
B2RZ27	B2RZ27		Sh3bgrl3	>tr|B2RZ27|B2RZ27_RAT Protein Sh3bgrl3 OS=Rattus norvegicus GN=Sh3bgrl3 PE=2 SV=1	10.477	93	545870	1695800	2299500	10196000	44137000	48540000	532390	566130	20190000	16811000	15632000	14663000	414260	1182600	21082000	17916000	28972000	2550100
B2RZ31	B2RZ31		Sirt3	>tr|B2RZ31|B2RZ31_RAT Protein Sirt3 OS=Rattus norvegicus GN=Sirt3 PE=2 SV=1	28.496	257	2882500	5229800	28415000	24674000	12417000	30550000	2635600	7120000	32139000	55289000	24582000	41513000	4585000	3689500	32589000	27573000	29664000	31920000
B2RZ37	B2RZ37	Receptor expression-enhancing protein 5	Reep5	>sp|B2RZ37|REEP5_RAT Receptor expression-enhancing protein 5 OS=Rattus norvegicus GN=Reep5 PE=1 SV=1	21.431	189	4779700	3263300	42010000	51198000	48767000	28014000	1675200	4592000	19887000	13791000	20459000	26920000	1499500	2048700	11842000	23189000	22202000	11737000
B2RZ44	B2RZ44		Naa20	>tr|B2RZ44|B2RZ44_RAT N-acetyltransferase 5 (ARD1 homolog, S. cerevisiae) OS=Rattus norvegicus GN=Naa20 PE=2 SV=1	21.47	188	0	0	0	3257900	3986200	1571500	0	0	4462900	2188700	1445500	1140700	100840	0	3441300	4018900	1658400	0
B2RZ57	B2RZ57		Mrpl18	>tr|B2RZ57|B2RZ57_RAT Mitochondrial ribosomal protein L18 OS=Rattus norvegicus GN=Mrpl18 PE=2 SV=1	20.65	180	308830	809640	1911600	3596600	1004300	1089000	10747000	531930	3933700	7014500	1397500	1428000	300850	404150	2164100	2463700	1961800	418030
B2RZ66	B2RZ66		Srp19	>tr|B2RZ66|B2RZ66_RAT Protein Srp19 OS=Rattus norvegicus GN=Srp19 PE=2 SV=1	16.138	144	1572500	2585100	29569000	44435000	36432000	23754000	759750	1752600	9963200	36407000	13671000	30442000	783310	806330	14705000	24330000	34746000	3992400
B2RZ68	B2RZ68		LOC100361861	>tr|B2RZ68|B2RZ68_RAT Protein Dcaf7 OS=Rattus norvegicus GN=Dcaf7 PE=2 SV=1	38.926	342	113210	0	955370	0	658280	666560	0	0	1676500	1129900	524080	1021100	0	107020	1243100	812200	76631	0
B2RZ72	B2RZ72		Arpc4	>tr|B2RZ72|B2RZ72_RAT Actin related protein 2/3 complex, subunit 4 (Predicted), isoform CRA_a OS=Rattus norvegicus GN=Arpc4 PE=2 SV=1	19.667	168	37686000	50309000	278470000	368380000	276280000	249940000	27265000	32453000	233840000	286870000	99807000	148580000	22570000	22418000	216170000	159080000	135470000	12289000
B2RZ74;D3Z8H0	B2RZ74;D3Z8H0		Snrnp70	>tr|B2RZ74|B2RZ74_RAT Protein Snrnp70 OS=Rattus norvegicus GN=Snrnp70 PE=2 SV=1;>tr|D3Z8H0|D3Z8H0_RAT Protein Snrnp70 OS=Rattus norvegicus GN=Snrnp70 PE=4 SV=1	52.133	451	119680	0	1059200	1639100	535270	586620	0	0	411340	897010	415530	649620	0	0	1899300	381880	373990	242400
B2RZ78;B2RZ78-2	B2RZ78;B2RZ78-2	Vacuolar protein sorting-associated protein 29	Vps29	>sp|B2RZ78|VPS29_RAT Vacuolar protein sorting-associated protein 29 OS=Rattus norvegicus GN=Vps29 PE=1 SV=2;>sp|B2RZ78-2|VPS29_RAT Isoform 2 of Vacuolar protein sorting-associated protein 29 OS=Rattus norvegicus GN=Vps29	20.468	182	13303000	15343000	63423000	87224000	66435000	51742000	8979900	10989000	50757000	114560000	50165000	61916000	9349200	7684400	57000000	77429000	57133000	160440
B2RZ79	B2RZ79		Iscu	>tr|B2RZ79|B2RZ79_RAT Iron-sulfur cluster scaffold homolog (E. coli) OS=Rattus norvegicus GN=Iscu PE=2 SV=1	17.967	167	1824400	3139900	20079000	23384000	25629000	15350000	2570700	2877500	17398000	35305000	15540000	19497000	2305000	1880400	19196000	15693000	27662000	1030900
B2RZ96;D4A453	B2RZ96		Ube2r2	>tr|B2RZ96|B2RZ96_RAT LOC689226 protein OS=Rattus norvegicus GN=Ube2r2 PE=2 SV=1	27.166	238	536070	495700	2921700	2662700	0	6913800	437800	342490	4957400	1635000	3495800	1865900	308930	406850	4646600	3001800	4759000	5550800
B2RZA0	B2RZA0		RGD1565059	>tr|B2RZA0|B2RZA0_RAT Protein RGD1565059 OS=Rattus norvegicus GN=RGD1565059 PE=2 SV=1	29.165	251	0	0	0	1816700	0	0	0	0	0	3198500	1015200	0	0	0	1146700	523940	0	35864
B2RZA5	B2RZA5		Prorsd1	>tr|B2RZA5|B2RZA5_RAT Protein Prorsd1 OS=Rattus norvegicus GN=Prorsd1 PE=2 SV=1	18.781	169	368900	412480	2857700	7041200	4827300	3716900	351330	266850	3753500	6683700	3582700	6150300	557510	612440	0	6571600	7019100	213720
B2RZA9	B2RZA9		Ube2l3	>tr|B2RZA9|B2RZA9_RAT Protein Ube2l3 OS=Rattus norvegicus GN=Ube2l3 PE=2 SV=1	17.861	154	11561000	25685000	102080000	121170000	94274000	114500000	8394000	14516000	52395000	107310000	57108000	87167000	8368000	5782500	30554000	86045000	123320000	599970
B2RZB3	B2RZB3		Eva1b	>tr|B2RZB3|B2RZB3_RAT Fam176b protein OS=Rattus norvegicus GN=Eva1b PE=2 SV=1	24.577	225	0	0	478920	0	1772400	1003300	0	0	0	575080	766780	602490	0	0	0	0	0	0
B2RZB5	B2RZB5		Chmp2a	>tr|B2RZB5|B2RZB5_RAT Chromatin modifying protein 2A OS=Rattus norvegicus GN=Chmp2a PE=2 SV=1	25.134	222	162390	1058800	2304900	3425600	1934400	1808600	0	595920	6709400	3471900	1615400	1415700	696120	727630	711190	2563400	2546900	3139200
B2RZB6	B2RZB6		Naa38	>tr|B2RZB6|B2RZB6_RAT LSM8 homolog, U6 small nuclear RNA associated (S. cerevisiae) OS=Rattus norvegicus GN=Lsm8 PE=2 SV=1	10.403	96	717430	1306200	7222300	13632000	4216600	9683300	892010	949810	3916300	16398000	3549000	3303000	264310	294710	5989700	3830400	8476000	0
B2RZB7	B2RZB7		Snrpd1	>tr|B2RZB7|B2RZB7_RAT Protein Snrpd1 OS=Rattus norvegicus GN=Snrpd1 PE=2 SV=1	13.281	119	766660	2872900	63652000	82783000	124340000	70237000	13602000	13037000	71254000	97670000	46200000	64535000	8616400	907370	64634000	35004000	57410000	3238200
B2RZB8	B2RZB8		Psmg4	>tr|B2RZB8|B2RZB8_RAT Protein Psmg4 OS=Rattus norvegicus GN=Psmg4 PE=2 SV=1	13.743	121	134830	542100	1559700	2930500	5442200	5759900	118550	282280	2833600	4703400	2294700	3538700	238860	0	4353100	5088600	6791400	514730
B2RZD0	B2RZD0		Mrp63	>tr|B2RZD0|B2RZD0_RAT Mitochondrial ribosomal protein 63 OS=Rattus norvegicus GN=Mrp63 PE=2 SV=1	12.039	102	687650	1066000	1961400	10158000	28392000	9597800	1213700	1192000	0	9773600	5491800	3377600	690320	366220	7943100	7102200	3948000	1865800
B2RZD1	B2RZD1		Sec61b	>tr|B2RZD1|B2RZD1_RAT Protein Sec61b OS=Rattus norvegicus GN=Sec61b PE=2 SV=1	9.9884	96	55676000	114120000	389450000	35868000	100360000	155440000	57569000	73751000	145070000	182060000	98308000	56055000	83858000	23630000	632730000	111050000	157440000	9587400
B2RZD2	B2RZD2	Transmembrane protein 126B	Tmem126b	>sp|B2RZD2|T126B_RAT Complex I assembly factor TMEM126B, mitochondrial OS=Rattus norvegicus GN=Tmem126b PE=1 SV=2	25.213	229	92086	418370	816900	1475800	1534700	4041700	169300	574160	1719300	3137300	2607100	5423500	209570	32758	172150	2721300	2101400	0
B2RZD6	B2RZD6		Ndufa4	>tr|B2RZD6|B2RZD6_RAT Ndufa4 protein OS=Rattus norvegicus GN=Ndufa4 PE=2 SV=1	9.3267	82	26062000	195690000	670820000	1122600000	934280000	1009200000	92132000	198600000	161950000	1918300000	277450000	280910000	115890000	71879000	240070000	786340000	1143800000	59921000
B2RZD7	B2RZD7	LYR motif-containing protein 9	Lyrm9	>sp|B2RZD7|LYRM9_RAT LYR motif-containing protein 9 OS=Rattus norvegicus GN=Lyrm9 PE=3 SV=1	9.3787	78	904490	1279500	4280700	16456000	8390600	17646000	1045000	1551200	7861200	9469600	6700500	9278100	634590	1065900	11020000	10136000	14405000	366070
B3DMA0	B3DMA0	Tumor protein p53-inducible protein 11	Tp53i11	>sp|B3DMA0|P5I11_RAT Tumor protein p53-inducible protein 11 OS=Rattus norvegicus GN=Tp53i11 PE=2 SV=1	20.939	189	399760	516750	6563400	5055800	728170	3871700	501630	363870	3662000	6679500	4394000	4706000	508180	431210	6420100	0	3026700	2503700
B3DMA1	B3DMA1		Atxn2l	>tr|B3DMA1|B3DMA1_RAT Atxn2l protein OS=Rattus norvegicus GN=Atxn2l PE=2 SV=1	112.85	1072	0	92093	425850	1424500	1518600	466910	0	0	199330	929680	589220	291910	102480	0	0	1576300	1007900	889960
B3DMA2	B3DMA2	Acyl-CoA dehydrogenase family member 11	Acad11	>sp|B3DMA2|ACD11_RAT Acyl-CoA dehydrogenase family member 11 OS=Rattus norvegicus GN=Acad11 PE=1 SV=1	87.37	779	15598000	23179000	103130000	159370000	57392000	104600000	10104000	11408000	82470000	166160000	88166000	115860000	8285000	9717500	100110000	124050000	130330000	66766000
B3DMA5	B3DMA5		Cnot7	>tr|B3DMA5|B3DMA5_RAT CCR4-NOT transcription complex, subunit 7 OS=Rattus norvegicus GN=Cnot7 PE=2 SV=1	32.718	285	199950	287640	1616500	2721800	474590	1884800	168390	236750	2158500	2816000	3764900	3432200	118580	155100	3379400	1836700	3167500	3966800
B3GNI6-3;B3GNI6;B3GNI6-2;B5DFG5	B3GNI6-3;B3GNI6;B3GNI6-2	Septin-11	40787	>sp|B3GNI6-3|SEP11_RAT Isoform 3 of Septin-11 OS=Rattus norvegicus GN=Sept11;>sp|B3GNI6|SEP11_RAT Septin-11 OS=Rattus norvegicus GN=Sept11 PE=1 SV=1;>sp|B3GNI6-2|SEP11_RAT Isoform 2 of Septin-11 OS=Rattus norvegicus GN=Sept11	48.964	425	7452500	5603900	52664000	63354000	30691000	35818000	7340500	7427300	43276000	63540000	37287000	34254000	4051600	5405300	43162000	45644000	32649000	40022000
B4F765	B4F765		Ift27	>tr|B4F765|B4F765_RAT Protein Ift27 OS=Rattus norvegicus GN=Ift27 PE=2 SV=1	20.796	186	0	0	959640	932070	760300	646440	0	0	473130	754680	332880	457290	0	0	0	710500	635970	0
B4F772	B4F772		Hspa4l	>tr|B4F772|B4F772_RAT Heat shock 70 kDa protein 4L OS=Rattus norvegicus GN=Hspa4l PE=2 SV=1	94.22	838	0	0	0	0	54914	0	0	0	0	0	0	0	0	0	0	0	0	0
B4F778	B4F778		Rfc4	>tr|B4F778|B4F778_RAT Protein Rfc4 OS=Rattus norvegicus GN=Rfc4 PE=2 SV=1	39.956	364	82958	110670	1311400	812320	4660900	911330	53676	23138	519810	4655900	815900	646650	34924	82271	777430	2676300	751900	984900
B4F779	B4F779		Appl2	>tr|B4F779|B4F779_RAT Adaptor protein, phosphotyrosine interaction, PH domain and leucine zipper containing 2 OS=Rattus norvegicus GN=Appl2 PE=2 SV=1	74.116	662	0	0	266540	80258	21056	138200	0	0	169660	444250	168680	189960	137040	0	166970	307690	261040	35201
B4F7A1;F1M3Z9	B4F7A1	Complex III assembly factor LYRM7	Lyrm7	>sp|B4F7A1|LYRM7_RAT Complex III assembly factor LYRM7 OS=Rattus norvegicus GN=Lyrm7 PE=3 SV=1	12.03	104	1021600	1548300	12138000	19625000	16616000	15153000	504810	935810	313860	28573000	14871000	23280000	2410400	1097800	17592000	18601000	18061000	5345800
B4F7A3	B4F7A3		Lgalsl	>tr|B4F7A3|B4F7A3_RAT Galectin OS=Rattus norvegicus GN=Lgalsl PE=1 SV=1	18.955	172	1126300	2411200	9793800	7153700	9461700	13597000	768270	1453900	13947000	12267000	7851900	7221900	1069700	1056100	3892000	13947000	6013700	695490
B4F7A5	B4F7A5		Cd99	>tr|B4F7A5|B4F7A5_RAT Cd99 protein OS=Rattus norvegicus GN=Cd99 PE=2 SV=1	16.588	165	770920	1805200	17825000	22907000	22858000	13923000	3695900	4202900	20033000	33627000	15320000	14778000	2364500	3142100	11149000	15317000	18862000	4076200
B4F7A9	B4F7A9		Csnk2a2	>tr|B4F7A9|B4F7A9_RAT Casein kinase 2, alpha prime polypeptide OS=Rattus norvegicus GN=Csnk2a2 PE=2 SV=1	41.201	350	1727600	1305800	9181100	11529000	3656700	7929400	1364100	690530	4348600	8264600	5103800	6976400	998080	793380	10753000	7744400	8855000	12722000
B4F7B2	B4F7B2		Taf10	>tr|B4F7B2|B4F7B2_RAT Protein Taf10 OS=Rattus norvegicus GN=Taf10 PE=2 SV=1	21.778	218	0	0	0	0	0	0	0	0	0	0	0	0	0	0	2030200	0	0	0
B4F7C2	B4F7C2		Tubb4a	>tr|B4F7C2|B4F7C2_RAT Protein Tubb4a OS=Rattus norvegicus GN=Tubb4a PE=2 SV=1	49.585	444	0	0	1391800	2880700	254330	0	0	0	978240	2214300	0	0	0	0	1966400	1784000	0	0
B4F7C9	B4F7C9		Stt3a	>tr|B4F7C9|B4F7C9_RAT Protein Stt3a OS=Rattus norvegicus GN=Stt3a PE=2 SV=1	80.597	705	16746000	24499000	134580000	204130000	19950000	123740000	17039000	18058000	87434000	130410000	61727000	77561000	16296000	4334000	120030000	104280000	76197000	46705000
B4F7E8	B4F7E8	Niban-like protein 1	Fam129b	>sp|B4F7E8|NIBL1_RAT Niban-like protein 1 OS=Rattus norvegicus GN=Fam129b PE=2 SV=1	84.73	747	92748	84450	450930	273910	412090	254300	26852	77765	333520	419940	287060	834710	26288	46604	418820	276840	1038300	162250
B4F7F3	B4F7F3		Arvcf	>tr|B4F7F3|B4F7F3_RAT Arvcf protein OS=Rattus norvegicus GN=Arvcf PE=2 SV=1	105.49	973	16807	20940	52148	910900	729380	259940	14026	21299	0	1105400	1198000	1498900	21391	0	1227700	603430	562030	1174100
B5D5N9;F1MAM0;B5D5N9-2	B5D5N9;F1MAM0;B5D5N9-2	Low affinity cationic amino acid transporter 2	Slc7a2	>sp|B5D5N9|CTR2_RAT Low affinity cationic amino acid transporter 2 OS=Rattus norvegicus GN=Slc7a2 PE=2 SV=1;>tr|F1MAM0|F1MAM0_RAT Low affinity cationic amino acid transporter 2 OS=Rattus norvegicus GN=Slc7a2 PE=4 SV=1;>sp|B5D5N9-2|CTR2_RAT Isoform 2 of Low	71.693	657	16060	9773.7	339750	1073400	12996	416010	44959	315260	6322800	1784100	797250	1135400	0	31186	1474400	0	1554400	1245600
B5DEG5	B5DEG5		N6amt2	>tr|B5DEG5|B5DEG5_RAT N6amt2 protein OS=Rattus norvegicus GN=N6amt2 PE=2 SV=1	24.338	214	0	0	858960	986060	638880	838300	0	0	794010	1006100	423570	850680	0	0	960320	823130	965800	0
B5DEG8	B5DEG8		Sec24c	>tr|B5DEG8|B5DEG8_RAT LOC685144 protein OS=Rattus norvegicus GN=Sec24c PE=2 SV=1	118.52	1095	2781300	4815400	26500000	29294000	21524000	25716000	3436500	3542800	18434000	38507000	19154000	27680000	2628800	2189900	28975000	25825000	27667000	21738000
B5DEH2	B5DEH2	Erlin-2	Erlin2	>sp|B5DEH2|ERLN2_RAT Erlin-2 OS=Rattus norvegicus GN=Erlin2 PE=1 SV=1	37.71	339	5799300	12340000	53389000	66570000	28189000	52494000	5093000	10671000	32568000	77398000	50002000	29248000	3021600	4691600	61039000	65748000	44834000	50232000
B5DEH4	B5DEH4		Uap1l1	>tr|B5DEH4|B5DEH4_RAT Protein Uap1l1 OS=Rattus norvegicus GN=Uap1l1 PE=2 SV=1	56.435	507	0	0	0	1094000	238810	2051600	0	0	764900	1125700	679810	941900	0	0	743240	929310	1223700	211260
B5DEJ1;D4A208;F1M287	B5DEJ1;D4A208;F1M287	SLIT-ROBO Rho GTPase-activating protein 2	Srgap2;Srgap1	>tr|B5DEJ1|B5DEJ1_RAT SLIT-ROBO Rho GTPase-activating protein 2 OS=Rattus norvegicus GN=Srgap2 PE=2 SV=1;>sp|D4A208|SRGP2_RAT SLIT-ROBO Rho GTPase-activating protein 2 OS=Rattus norvegicus GN=Srgap2 PE=1 SV=1;>tr|F1M287|F1M287_RAT Protein Srgap1 OS=Rattus	98.367	858	34508	85690	998960	0	0	0	44255	64145	353080	0	105200	168820	0	19208	630730	687990	240490	0
B5DEJ5;D3Z9S4	B5DEJ5;D3Z9S4		Eefsec	>tr|B5DEJ5|B5DEJ5_RAT Eefsec protein OS=Rattus norvegicus GN=Eefsec PE=2 SV=1;>tr|D3Z9S4|D3Z9S4_RAT Protein Eefsec OS=Rattus norvegicus GN=Eefsec PE=4 SV=1	63.659	583	740100	1266200	8382600	8976000	4164500	9405700	1420100	1464900	12466000	14786000	7499800	6122900	1048000	794850	14947000	10039000	10385000	5299000
B5DEJ6	B5DEJ6		Tpk1	>tr|B5DEJ6|B5DEJ6_RAT Protein Tpk1 OS=Rattus norvegicus GN=Tpk1 PE=2 SV=1	27.207	243	1565500	4053300	35746000	21015000	3474000	25517000	1199700	1753800	15139000	27653000	18526000	30220000	1282300	1825800	10989000	25435000	28382000	0
B5DEK0	B5DEK0		Rprd1b	>tr|B5DEK0|B5DEK0_RAT Protein Rprd1b OS=Rattus norvegicus GN=Rprd1b PE=2 SV=1	36.883	326	1148900	2415800	4062600	11640000	3904400	7304500	1039900	1370600	5284500	8498100	3717100	5009800	1352000	943510	15844000	10508000	6097300	6511600
B5DEL7	B5DEL7		Sec61g	>tr|B5DEL7|B5DEL7_RAT Protein LOC100361694 OS=Rattus norvegicus GN=LOC100361694 PE=2 SV=1	7.7412	68	3499000	7851100	48597000	143630000	51124000	53964000	3586700	4579500	90533000	99244000	40372000	36563000	5511600	3164100	99122000	76902000	77364000	17238000
B5DEL8;F7FG98	B5DEL8;F7FG98		Ndufs5	>tr|B5DEL8|B5DEL8_RAT NADH dehydrogenase (Ubiquinone) Fe-S protein 5 OS=Rattus norvegicus GN=LOC100363268 PE=2 SV=1;>tr|F7FG98|F7FG98_RAT Uncharacterized protein OS=Rattus norvegicus GN=Ndufs5 PE=4 SV=1	12.7	106	11557000	25162000	203070000	222680000	183360000	133190000	22162000	28352000	163930000	398020000	180460000	232810000	25725000	9851700	152600000	196590000	267770000	45360000
B5DEM7	B5DEM7		Supt4h1	>tr|B5DEM7|B5DEM7_RAT Transcription elongation factor SPT4 OS=Rattus norvegicus GN=Supt4h1 PE=2 SV=1	13.193	117	947950	1723600	4412400	6128700	3795400	2872900	957510	820130	3243700	5502300	493110	207290	1643600	635320	3311600	3516200	0	0
B5DEN5;F1M0U2;Q7TPK5	B5DEN5		Eef1b2	>tr|B5DEN5|B5DEN5_RAT Eukaryotic translation elongation factor 1 beta 2 OS=Rattus norvegicus GN=Eef1b2 PE=1 SV=1	24.675	225	26133000	45121000	277700000	291300000	101380000	173950000	25448000	47373000	148790000	283440000	143010000	242750000	30909000	25594000	383140000	254640000	398050000	301130000
B5DEN9	B5DEN9	Vacuolar protein sorting-associated protein 28 homolog	Vps28	>sp|B5DEN9|VPS28_RAT Vacuolar protein sorting-associated protein 28 homolog OS=Rattus norvegicus GN=Vps28 PE=2 SV=1	26.11	228	435410	977650	3559400	5448600	2754200	2465500	155210	425090	3229100	5554600	2267700	3361300	399360	647560	5647300	5447600	4653300	125980
B5DEP5	B5DEP5		Trip4	>tr|B5DEP5|B5DEP5_RAT Protein Trip4 OS=Rattus norvegicus GN=Trip4 PE=2 SV=1	65.851	581	0	0	6766800	3444000	0	466280	0	0	3383100	417000	77408	26930	0	0	0	30620	184580	0
B5DEP7	B5DEP7		Snrpg	>tr|B5DEP7|B5DEP7_RAT Protein LOC100911683 OS=Rattus norvegicus GN=LOC100360635 PE=2 SV=1	8.496	76	495070	1614600	4265800	2990400	5155800	10329000	442180	402470	8138100	7563600	1922300	3162300	405020	342580	7373000	426030	257200	0
B5DEQ0	B5DEQ0		Ssr2	>tr|B5DEQ0|B5DEQ0_RAT Translocon-associated protein subunit beta OS=Rattus norvegicus GN=Ssr2 PE=2 SV=1	20.021	183	0	0	0	760870	2252000	0	0	0	0	0	0	0	0	0	0	0	0	11092000
B5DEQ4	B5DEQ4		Snrpb2	>tr|B5DEQ4|B5DEQ4_RAT Protein Snrpb2 OS=Rattus norvegicus GN=Snrpb2 PE=2 SV=1	25.352	225	1973100	3176100	16799000	9736000	4815900	4559200	2644000	3331200	18319000	22165000	7603700	4499300	1097800	759420	10640000	3530700	4694000	587880
B5DER5	B5DER5		Chchd1	>tr|B5DER5|B5DER5_RAT Coiled-coil-helix-coiled-coil-helix domain containing 1 OS=Rattus norvegicus GN=Chchd1 PE=2 SV=1	13.407	118	0	0	1490500	4713200	4041000	5083100	0	0	2508900	7183100	2877500	6169700	0	0	147070	1130200	5315900	324080
B5DES0;M0R8K2	B5DES0		Snrpd2	>tr|B5DES0|B5DES0_RAT Protein Snrpd2 OS=Rattus norvegicus GN=Snrpd2 PE=2 SV=1	13.527	118	4234700	9606100	49908000	65207000	25863000	33311000	8372000	12408000	49833000	81221000	27535000	39392000	7603200	5246700	47566000	25164000	19711000	4562800
B5DEY0	B5DEY0		Pls1	>tr|B5DEY0|B5DEY0_RAT Pls1 protein OS=Rattus norvegicus GN=Pls1 PE=2 SV=1	51.65	463	1181400	1031500	12224000	15283000	13127000	13353000	1360800	1009400	7945400	14532000	9418700	10822000	1166500	943500	21857000	12397000	15873000	7930900
B5DEY8	B5DEY8		Snx6	>tr|B5DEY8|B5DEY8_RAT Protein Snx6 OS=Rattus norvegicus GN=Snx6 PE=2 SV=1	46.636	406	695500	374860	11913000	8211200	4491800	5517700	831190	635520	6672600	8329700	3884000	2417300	320000	619930	4551400	5519500	3067400	2595100
B5DF07	B5DF07	Mitochondrial ribonuclease P protein 3	Mrpp3	>sp|B5DF07|MRRP3_RAT Mitochondrial ribonuclease P protein 3 OS=Rattus norvegicus GN=Mrpp3 PE=2 SV=1	67.007	587	0	0	191530	191440	0	357150	0	0	1203500	3055900	658290	73686	0	0	1975400	738470	597110	240860
B5DF26	B5DF26		Osbpl8	>tr|B5DF26|B5DF26_RAT Similar to oxysterol-binding protein-like protein 8 isoform a OS=Rattus norvegicus GN=Osbpl8 PE=2 SV=1	16.256	144	0	0	446880	695920	368620	498280	0	0	0	753930	689440	672690	0	0	0	0	877900	421080
B5DF29	B5DF29		Rfc5	>tr|B5DF29|B5DF29_RAT Protein Rfc5 OS=Rattus norvegicus GN=Rfc5 PE=2 SV=1	38.098	338	0	0	0	718240	308980	553720	0	0	0	850770	0	0	0	0	1983400	537510	681150	427740
B5DF36	B5DF36		Plac8	>tr|B5DF36|B5DF36_RAT Placenta-specific 8 OS=Rattus norvegicus GN=Plac8 PE=2 SV=1	12.327	112	6516100	11206000	114620000	133250000	62203000	92793000	16915000	18239000	190690000	292000000	85582000	109250000	6551900	6418600	128570000	199850000	148760000	91644000
B5DF46	B5DF46		Pmm2	>tr|B5DF46|B5DF46_RAT Phosphomannomutase OS=Rattus norvegicus GN=Pmm2 PE=2 SV=1	27.708	242	5151700	22837000	77134000	89124000	35589000	89574000	6360400	8991500	77123000	135370000	50253000	78436000	6408200	11267000	150290000	90123000	83045000	51674000
B5DF48	B5DF48		Tyw1	>tr|B5DF48|B5DF48_RAT Protein Tyw1 OS=Rattus norvegicus GN=Tyw1 PE=2 SV=1	82.086	724	0	0	704860	405470	262340	444050	0	0	644530	509430	253730	404570	0	0	708430	486030	254500	254790
B5DF51	B5DF51	Membrane magnesium transporter 1	Mmgt1	>sp|B5DF51|MMGT1_RAT Membrane magnesium transporter 1 OS=Rattus norvegicus GN=Mmgt1 PE=2 SV=1	14.677	131	4345600	9242900	28701000	24631000	38091000	49476000	4273400	5840300	11237000	37917000	20708000	11672000	6954800	2518600	42674000	22325000	41802000	6672100
B5DF55;Q5XHY7	B5DF55		Stam	>tr|B5DF55|B5DF55_RAT Protein Stam OS=Rattus norvegicus GN=Stam PE=2 SV=1	59.591	547	172770	199560	887460	1903200	357820	1799700	234900	125860	792390	0	674140	1835200	155260	127410	1584600	1872200	2296000	3052200
B5DF57	B5DF57		Epb42	>tr|B5DF57|B5DF57_RAT Erythrocyte protein band 4.2 OS=Rattus norvegicus GN=Epb42 PE=2 SV=1	76.5	689	506490	354560	2141500	2171900	5359100	11461000	1480900	350630	12344000	3908800	6572900	7503800	358800	369850	1238700	3480800	3940300	2675200
B5DF60	B5DF60		Eif1ax	>tr|B5DF60|B5DF60_RAT Eukaryotic translation initiation factor 1A, Y-linked OS=Rattus norvegicus GN=Eif1ax PE=2 SV=1	16.46	144	7445200	14886000	39968000	68976000	13189000	22511000	3117800	11992000	20280000	50469000	8474600	11324000	8467300	6646400	22460000	48531000	30865000	18531000
B5DF65	B5DF65		Blvrb	>tr|B5DF65|B5DF65_RAT Biliverdin reductase B (Flavin reductase (NADPH)) OS=Rattus norvegicus GN=Blvrb PE=2 SV=1	22.094	206	123960000	168880000	815620000	413140000	294720000	623900000	124160000	142240000	934600000	781930000	555150000	505240000	93191000	137120000	519810000	786740000	294000000	29401000
B5DF74;F1LWM8	B5DF74	Oxysterol-binding protein	Osbpl11	>tr|B5DF74|B5DF74_RAT Oxysterol-binding protein OS=Rattus norvegicus GN=Osbpl11 PE=2 SV=1	83.964	754	100690	322220	2304200	3272200	2451300	2348500	287770	155690	1695300	2235300	2264300	2081800	266760	177980	4559400	2591900	4946400	4448900
B5DF86	B5DF86		Cog8	>tr|B5DF86|B5DF86_RAT Component of oligomeric golgi complex 8 OS=Rattus norvegicus GN=Cog8 PE=2 SV=1	70.761	634	29066	214830	918230	748510	807450	529950	177500	182060	1956100	572930	878660	1075100	145080	136860	2245300	1531800	2116200	1352200
B5DF89	B5DF89	Cullin-3	Cul3	>sp|B5DF89|CUL3_RAT Cullin-3 OS=Rattus norvegicus GN=Cul3 PE=1 SV=2	88.931	768	671100	474940	6481400	6245000	4160800	3840800	670720	279210	5027900	6778400	2774000	7173200	712460	588130	6187800	4083700	7734900	1974700
B5DF91;D3ZE54	B5DF91		Elavl1	>tr|B5DF91|B5DF91_RAT ELAV (Embryonic lethal, abnormal vision, Drosophila)-like 1 (Hu antigen R) OS=Rattus norvegicus GN=Elavl1 PE=2 SV=1	36.169	326	4662200	6606000	31491000	36662000	18309000	22651000	7427500	7753000	39046000	68973000	23301000	22167000	2688700	4295900	28794000	26867000	14977000	14112000
B5DFB2;D4A250	B5DFB2;D4A250		Rbbp4;RGD1563620	>tr|B5DFB2|B5DFB2_RAT Protein Rbbp4 OS=Rattus norvegicus GN=Rbbp4 PE=2 SV=1;>tr|D4A250|D4A250_RAT Protein RGD1563620 OS=Rattus norvegicus GN=RGD1563620 PE=4 SV=1	47.655	425	4259400	6205400	34657000	54998000	58305000	33525000	4548200	5716200	29686000	67029000	30339000	23504000	3869000	4807100	36650000	47231000	51832000	47183000
B5DFC3	B5DFC3		Sec23a	>tr|B5DFC3|B5DFC3_RAT Protein Sec23a OS=Rattus norvegicus GN=Sec23a PE=2 SV=1	86.161	765	9001200	13723000	87761000	94262000	50504000	74425000	8303400	7149600	74122000	123090000	53750000	66139000	8566500	7043700	68821000	81853000	93300000	60275000
B5DFC8	B5DFC8	Eukaryotic translation initiation factor 3 subunit C	Eif3c	>sp|B5DFC8|EIF3C_RAT Eukaryotic translation initiation factor 3 subunit C OS=Rattus norvegicus GN=Eif3c PE=2 SV=1	105.43	911	3156500	6466600	26572000	30131000	24663000	31318000	3212900	3557300	18857000	26681000	18036000	17849000	4366200	3924900	26089000	35255000	37219000	17306000
B5DFD1	B5DFD1		Nudcd1	>tr|B5DFD1|B5DFD1_RAT NudC domain containing 1 OS=Rattus norvegicus GN=Nudcd1 PE=2 SV=1	66.368	580	138770	190630	872500	870320	77898	1586200	156570	230680	3287400	1443500	558860	1238500	219820	119790	2154600	1268100	1792400	1560300
B5DFD8	B5DFD8	SH3 domain-binding glutamic acid-rich-like protein	Sh3bgrl	>tr|B5DFD8|B5DFD8_RAT SH3 domain-binding glutamic acid-rich-like protein OS=Rattus norvegicus GN=Sh3bgrl PE=2 SV=1	12.8	114	12023000	30816000	181750000	235170000	231770000	178210000	17179000	21239000	121990000	298380000	150690000	198720000	17559000	11203000	171520000	147410000	194430000	9106800
B5DFE0	B5DFE0		Mpp6	>tr|B5DFE0|B5DFE0_RAT Mpp6 protein OS=Rattus norvegicus GN=Mpp6 PE=2 SV=1	60.933	540	2498300	2151900	14556000	19587000	8900400	11720000	2524100	2961700	20437000	26044000	12366000	16863000	2053700	2052300	21295000	22406000	20834000	8043600
B5DFF2	B5DFF2		Rbpms2	>tr|B5DFF2|B5DFF2_RAT Protein Rbpms2 OS=Rattus norvegicus GN=Rbpms2 PE=2 SV=1	22.701	210	214630	740580	6060500	4085800	1080100	5482400	60222	213260	3454300	9582400	3779600	5034300	386330	284880	7728500	4537500	3743400	0
B5DFH4;F1LX70	B5DFH4		Papss2	>tr|B5DFH4|B5DFH4_RAT Papss2 protein OS=Rattus norvegicus GN=Papss2 PE=2 SV=1	69.411	614	10621000	10442000	79681000	85434000	59781000	57353000	5906400	6575100	42239000	62731000	42635000	42699000	7941800	7575300	66275000	51625000	58731000	58267000
B5DFI3;B2GV08;M0RD05	B5DFI3		Ap1s1	>tr|B5DFI3|B5DFI3_RAT Adaptor protein complex AP-1, sigma 1 (Predicted), isoform CRA_b OS=Rattus norvegicus GN=Ap1s1 PE=2 SV=1	18.733	158	1940000	4353700	21351000	44800000	20550000	25869000	1309900	3289600	22274000	37287000	17145000	22808000	3591900	2452500	15487000	23602000	26326000	3781200
B5DFJ2	B5DFJ2		Fam3a	>tr|B5DFJ2|B5DFJ2_RAT Fam3a protein OS=Rattus norvegicus GN=Fam3a PE=2 SV=1	25.15	227	169390	283060	1712600	2134400	1044600	1330300	109430	224580	885980	2631900	788840	1393200	166640	138530	1246900	2314800	847290	72113
B5DFJ4	B5DFJ4		Vps18	>tr|B5DFJ4|B5DFJ4_RAT Protein Vps18 OS=Rattus norvegicus GN=Vps18 PE=2 SV=1	110.18	973	100540	134900	311010	1830100	928840	1040500	99275	132750	503700	1469500	961300	1428700	72098	90392	865770	963490	1173900	810290
B5DFK6	B5DFK6		Ap3d1	>tr|B5DFK6|B5DFK6_RAT AP-3 complex subunit delta OS=Rattus norvegicus GN=Ap3d1 PE=2 SV=1	135.67	1204	0	116330	1128200	4729400	2459500	2464100	0	0	1318800	2167000	1665600	2540000	57571	0	1075600	1004400	3416600	3680300
B5DFL6	B5DFL6		Cmtm3	>tr|B5DFL6|B5DFL6_RAT CKLF-like MARVEL transmembrane domain containing 3 OS=Rattus norvegicus GN=Cmtm3 PE=2 SV=1	20.35	184	0	0	2517100	6819600	2111200	2692800	0	0	0	7261600	4414800	3881200	0	0	0	1561000	2975900	765830
B5DFM8	B5DFM8		Bcas2	>tr|B5DFM8|B5DFM8_RAT Breast carcinoma amplified sequence 2 OS=Rattus norvegicus GN=Bcas2 PE=2 SV=1	26.101	225	638420	990360	3482100	2093100	2450800	2035800	580880	917240	900220	4261400	1371900	2916300	864000	571750	4616900	4359900	3598500	3427100
B5DFN1	B5DFN1		Eif1b	>tr|B5DFN1|B5DFN1_RAT Eukaryotic translation initiation factor 1B OS=Rattus norvegicus GN=Eif1b PE=2 SV=1	12.823	113	147430	447230	1913800	0	6785000	6975400	95460	0	2590300	1195500	2483300	5154900	346890	16649	3066700	2787600	9305800	981260
B5DFN4	B5DFN4		Pfdn5	>tr|B5DFN4|B5DFN4_RAT Prefoldin 5 (Predicted), isoform CRA_a OS=Rattus norvegicus GN=Pfdn5 PE=2 SV=1	17.326	154	1980300	3827700	19014000	38936000	20548000	23828000	889060	2215300	20182000	39843000	10097000	17445000	2377300	2173700	18609000	25938000	26759000	945430
C0JPT7	C0JPT7		Flna	>tr|C0JPT7|C0JPT7_RAT Filamin alpha OS=Rattus norvegicus GN=Flna PE=2 SV=1	280.49	2639	1504400	2727900	28938000	34874000	6916200	22511000	2021300	1951700	26827000	21080000	14466000	17320000	1788000	2549500	25182000	18477000	26472000	14466000
C0KUC5	C0KUC5		Lims1	>tr|C0KUC5|C0KUC5_RAT LIM and senescent cell antigen-like domains 1 isoform D OS=Rattus norvegicus GN=Lims1 PE=2 SV=1	41.609	362	573640	1543200	8637900	9499500	4687000	6043600	932710	1699800	11174000	16701000	8990800	8898400	609270	839500	12885000	4839300	12227000	13595000
D2XV59	D2XV59	GTP-binding protein 1	Gtpbp1	>sp|D2XV59|GTPB1_RAT GTP-binding protein 1 OS=Rattus norvegicus GN=Gtpbp1 PE=1 SV=1	72.488	669	89964	109960	1267400	3527700	1212500	1996700	50902	79125	2191400	1944200	527730	1081300	73429	98875	1353800	865910	773680	1235000
D3Z7Z4	D3Z7Z4		Lipt1	>tr|D3Z7Z4|D3Z7Z4_RAT Protein Lipt1 OS=Rattus norvegicus GN=Lipt1 PE=1 SV=1	41.936	371	0	134460	987130	1105100	0	0	0	0	1291800	2978500	472030	575320	0	0	2017000	757910	427860	1086100
D3Z863	D3Z863		Cwf19l1	>tr|D3Z863|D3Z863_RAT CWF19-like 1, cell cycle control (S. pombe) (Predicted) OS=Rattus norvegicus GN=Cwf19l1 PE=4 SV=1	60.377	537	0	0	460610	871870	0	319240	0	0	0	608150	697960	681530	0	158450	147240	781250	1248300	842670
D3Z865	D3Z865		Mpdu1	>tr|D3Z865|D3Z865_RAT Mannose-P-dolichol utilization defect 1 OS=Rattus norvegicus GN=Mpdu1 PE=4 SV=1	26.547	247	2979400	4310000	20054000	33224000	1600500	42098000	1191600	2555500	13194000	29235000	11034000	28799000	1418800	346150	21654000	19237000	28377000	5414500
D3Z8B0	D3Z8B0		Cox16	>tr|D3Z8B0|D3Z8B0_RAT Protein Cox16 OS=Rattus norvegicus GN=Cox16 PE=4 SV=1	12.252	106	784670	1477100	4415800	11956000	7851100	10895000	654460	899230	4190100	9800800	5995200	3555600	1195700	756830	4576700	48488000	6209400	2006200
D3Z8B2	D3Z8B2		Nup133	>tr|D3Z8B2|D3Z8B2_RAT Protein Nup133 (Fragment) OS=Rattus norvegicus GN=Nup133 PE=4 SV=2	71.72	627	16750	267010	1056900	917060	344260	670180	92765	184770	867220	497810	157830	311460	46098	66597	1364800	557890	0	44399
D3Z8B6	D3Z8B6		Abhd15	>tr|D3Z8B6|D3Z8B6_RAT Protein Abhd15 OS=Rattus norvegicus GN=Abhd15 PE=4 SV=1	51.285	459	0	251850	0	0	0	0	182740	150640	0	0	0	0	0	0	0	0	0	0
D3Z8E1	D3Z8E1			>tr|D3Z8E1|D3Z8E1_RAT Ferritin (Fragment) OS=Rattus norvegicus PE=3 SV=2	18.551	163	0	0	0	0	0	790710	0	0	0	0	0	0	0	0	0	0	0	0
D3Z8F1	D3Z8F1		Vill	>tr|D3Z8F1|D3Z8F1_RAT Protein Vill OS=Rattus norvegicus GN=Vill PE=4 SV=1	96.646	860	174010	55454	1396400	1379600	353750	765350	328810	99568	933070	941450	689040	642050	168550	26843	1757200	2004700	1346200	853730
D3Z8G2	D3Z8G2	Glyceraldehyde-3-phosphate dehydrogenase		>tr|D3Z8G2|D3Z8G2_RAT Glyceraldehyde-3-phosphate dehydrogenase OS=Rattus norvegicus PE=3 SV=1	27.687	263	798240	1099100	6487500	4731100	120450	0	1901600	1074900	5390800	270070	158760	0	462930	20614	8511600	5379000	0	0
D3Z8G7	D3Z8G7		Tjp3	>tr|D3Z8G7|D3Z8G7_RAT Protein Tjp3 OS=Rattus norvegicus GN=Tjp3 PE=1 SV=2	99.687	907	0	26832	0	164850	413710	266650	0	0	57041	176750	52268	108560	0	0	184190	72678	206930	0
D3Z8I7	D3Z8I7		Gstt3	>tr|D3Z8I7|D3Z8I7_RAT Protein Gstt3 OS=Rattus norvegicus GN=Gstt3 PE=4 SV=1	23.381	210	28655000	59453000	395890000	333570000	135430000	282160000	73209000	91362000	661570000	1205000000	584170000	723300000	50907000	94296000	700670000	809040000	736680000	19547000
D3Z8K0	D3Z8K0		Pdzd11	>tr|D3Z8K0|D3Z8K0_RAT PDZ domain containing 11 (Predicted), isoform CRA_a OS=Rattus norvegicus GN=Pdzd11 PE=4 SV=1	16.182	140	0	305620	3541600	3615900	4021900	3500300	0	307520	1448200	6369800	2747600	4486000	246550	0	0	3714800	5043700	0
D3Z8L0	D3Z8L0		Tmem42	>tr|D3Z8L0|D3Z8L0_RAT Protein Tmem42 OS=Rattus norvegicus GN=Tmem42 PE=4 SV=1	16.796	157	0	0	11333000	21994000	9546700	11707000	0	0	2922000	19401000	22654000	10928000	0	0	22955000	6358000	11755000	17149000
D3Z8L7	D3Z8L7	Ras-related protein R-Ras	Rras	>sp|D3Z8L7|RRAS_RAT Ras-related protein R-Ras OS=Rattus norvegicus GN=Rras PE=1 SV=1	23.909	218	1852600	2268000	16233000	20327000	1389700	16343000	1694400	2134900	19819000	33642000	14923000	19703000	1581500	933090	26518000	22999000	20345000	15537
D3Z8M3	D3Z8M3		Khnyn	>tr|D3Z8M3|D3Z8M3_RAT Protein Khnyn OS=Rattus norvegicus GN=Khnyn PE=4 SV=1	74.758	675	0	11025	193990	0	0	254260	0	0	111910	110050	0	0	16212	5197.4	299890	666260	271850	0
D3Z8Q5	D3Z8Q5		RGD1561582	>tr|D3Z8Q5|D3Z8Q5_RAT Protein RGD1561582 OS=Rattus norvegicus GN=RGD1561582 PE=4 SV=1	12.124	110	0	0	837160	3266800	2698800	2157500	0	0	0	5270300	1067500	0	0	0	2066400	3743700	1179300	27058
D3Z8Q7	D3Z8Q7		Fam96b	>tr|D3Z8Q7|D3Z8Q7_RAT Protein Fam96b OS=Rattus norvegicus GN=Fam96b PE=4 SV=1	17.751	165	112990	928350	3869800	5913900	4983700	5829800	158620	852140	1645800	6948000	2911900	5340300	453380	491200	2076200	4924000	7639200	1418900
D3Z8R4	D3Z8R4		RGD1565486	>tr|D3Z8R4|D3Z8R4_RAT Protein RGD1565486 OS=Rattus norvegicus GN=Rbm25l1 PE=4 SV=2	55.594	464	82042	675790	698010	0	63347	0	309640	468740	780010	0	180200	198220	370630	164800	1785200	265470	0	0
D3Z8U8	D3Z8U8			>tr|D3Z8U8|D3Z8U8_RAT Uncharacterized protein OS=Rattus norvegicus PE=3 SV=1	34.003	315	0	0	0	0	517150	0	0	0	0	0	0	0	0	0	0	0	0	0
D3Z8W0	D3Z8W0		Paox	>tr|D3Z8W0|D3Z8W0_RAT Protein Paox OS=Rattus norvegicus GN=Paox PE=4 SV=1	58.839	531	984890	1323400	2693200	2237000	3138700	6587500	752760	1016900	3831800	2310300	9578800	13374000	1132500	1672900	6153700	2917500	12642000	7370800
D3Z8X6	D3Z8X6		Dtx3l	>tr|D3Z8X6|D3Z8X6_RAT Protein Dtx3l OS=Rattus norvegicus GN=Dtx3l PE=4 SV=1	83.102	750	223210	3405100	4793700	3836500	2452700	7687600	148620	244550	2751800	5819900	1992500	2092700	566310	478630	7821700	2413000	6464000	2998200
D3Z916	D3Z916		Fam188a	>tr|D3Z916|D3Z916_RAT Protein Fam188a OS=Rattus norvegicus GN=Fam188a PE=4 SV=1	49.502	444	173320	0	1603100	1683600	1746600	1714000	234580	230030	366630	657510	1447500	1096700	100100	132460	726760	561920	1992100	1445200
D3Z917	D3Z917		Dolpp1	>tr|D3Z917|D3Z917_RAT Dolichyl pyrophosphate phosphatase 1 (Predicted), isoform CRA_c OS=Rattus norvegicus GN=Dolpp1 PE=4 SV=1	22.187	195	0	0	212370	1655300	0	380590	0	0	0	549360	1105200	621240	0	0	483170	1211300	87852	1015600
D3Z941	D3Z941		Mars	>tr|D3Z941|D3Z941_RAT Protein Mars OS=Rattus norvegicus GN=Mars PE=3 SV=1	101.58	902	2755200	5274500	31447000	44463000	24794000	31956000	3136800	2771500	21552000	42073000	24752000	32377000	3546400	2488200	28654000	34019000	48951000	23474000
D3Z946	D3Z946		Tmem70	>tr|D3Z946|D3Z946_RAT Protein Tmem70 OS=Rattus norvegicus GN=Tmem70 PE=4 SV=1	28.399	253	1683000	2717300	8252500	20769000	13224000	11531000	1949900	2712200	9707500	19769000	9830400	14988000	2010000	1286200	17391000	13866000	13307000	0
D3Z949;B5DFN3	D3Z949;B5DFN3	Mitochondrial nucleoid factor 1	RGD1561671;Mnf1	>tr|D3Z949|D3Z949_RAT Protein RGD1561671 OS=Rattus norvegicus GN=RGD1561671 PE=4 SV=2;>sp|B5DFN3|UQCC2_RAT Ubiquinol-cytochrome-c reductase complex assembly factor 2 OS=Rattus norvegicus GN=Uqcc2 PE=2 SV=1	16.503	136	3140200	5075400	22974000	26424000	21271000	16720000	2996500	4865000	14096000	30380000	10910000	13902000	1886700	1943600	18952000	18325000	7476200	3171700
D3Z994	D3Z994		Tbc1d22a	>tr|D3Z994|D3Z994_RAT Protein Tbc1d22a OS=Rattus norvegicus GN=Tbc1d22a PE=4 SV=2	58.546	510	0	0	0	0	396070	0	0	0	0	0	140030	0	0	0	0	0	0	242390
D3Z9A9;F1LV63	D3Z9A9			>tr|D3Z9A9|D3Z9A9_RAT Uncharacterized protein (Fragment) OS=Rattus norvegicus PE=4 SV=2	32.346	297	0	0	3987900	0	0	0	0	0	329810	4034100	0	0	0	0	0	764340	1657000	4561400
D3Z9B0	D3Z9B0		Glod5	>tr|D3Z9B0|D3Z9B0_RAT Protein Glod5 OS=Rattus norvegicus GN=Glod5 PE=4 SV=1	16.604	148	184760	464370	615060	1064600	1492500	1814400	775040	1227300	4004100	4067400	3684100	5239600	689910	797340	2817200	2393100	6618900	1514900
D3Z9C0	D3Z9C0		Mios	>tr|D3Z9C0|D3Z9C0_RAT Protein Mios OS=Rattus norvegicus GN=Mios PE=4 SV=1	98.409	875	45182	44024	275020	527920	76287	85890	42705	29191	196360	562650	72717	89222	15107	16534	438280	343340	416800	145750
D3Z9D2	D3Z9D2		Fyco1	>tr|D3Z9D2|D3Z9D2_RAT FYVE and coiled-coil domain containing 1 (Predicted) OS=Rattus norvegicus GN=Fyco1 PE=4 SV=1	163.55	1451	80625	201210	2354600	2231800	2036200	3341400	38866	58558	993400	2465700	1273100	2358600	131160	116040	3754700	2756000	5122600	2612000
D3Z9D5;M0R5Y9	D3Z9D5;M0R5Y9		Zbtb8os	>tr|D3Z9D5|D3Z9D5_RAT Protein Zbtb8os OS=Rattus norvegicus GN=Zbtb8os PE=4 SV=2;>tr|M0R5Y9|M0R5Y9_RAT Protein Zbtb8os OS=Rattus norvegicus GN=Zbtb8os PE=4 SV=1	17.166	146	3393500	6331800	33036000	25129000	56935000	73686000	2341400	4549800	26081000	35826000	30926000	52103000	6201000	2895300	33608000	30047000	53260000	1828500
D3Z9E6	D3Z9E6		Cpsf2	>tr|D3Z9E6|D3Z9E6_RAT Cleavage and polyadenylation specific factor 2 (Predicted) OS=Rattus norvegicus GN=Cpsf2 PE=4 SV=1	88.35	782	0	0	1332300	1268200	0	231240	0	0	197120	809500	0	244090	0	0	0	0	233150	0
D3Z9G9	D3Z9G9		RGD1560017	>tr|D3Z9G9|D3Z9G9_RAT Protein LOC690772 (Fragment) OS=Rattus norvegicus GN=RGD1560017 PE=3 SV=2	15.36	132	1172100	1826500	12876000	21669000	0	0	105710	947220	834390	24871000	0	0	816060	1651600	26301000	16374000	0	0
D3Z9I1	D3Z9I1		Coa3	>tr|D3Z9I1|D3Z9I1_RAT Protein Coa3 OS=Rattus norvegicus GN=Coa3 PE=4 SV=1	11.928	108	9533400	15681000	39911000	94016000	49815000	50712000	11270000	15024000	45312000	103260000	38041000	36602000	14435000	5450100	62198000	59066000	55035000	48045000
D3Z9I9	D3Z9I9		Stard4	>tr|D3Z9I9|D3Z9I9_RAT Protein Stard4 OS=Rattus norvegicus GN=Stard4 PE=4 SV=1	25.544	224	98723	274860	4388800	3458500	1145000	4573900	126820	149510	2202200	6589900	2731000	2640400	151860	104660	3402900	4837500	3332700	131730
D3Z9J3;M0RBD7;REV__R9PXR9;REV__Q4FZV2	D3Z9J3		Atp11c	>tr|D3Z9J3|D3Z9J3_RAT Protein Atp11c OS=Rattus norvegicus GN=Atp11c PE=4 SV=2	127.76	1116	0	0	107750	36124	0	56063	0	0	128970	194530	23194	97593	0	0	96820	59234	50875	0
D3Z9J8	D3Z9J8		Sat2	>tr|D3Z9J8|D3Z9J8_RAT Sodium-coupled neutral amino acid transporter 2 OS=Rattus norvegicus GN=Sat2 PE=4 SV=1	19.289	170	311660	1231700	2481100	2185200	975930	2898300	373320	1253400	6018100	2632100	2208300	3010700	1079800	1058500	3689100	1715400	3405500	58252
D3Z9J9	D3Z9J9		Pnpla3	>tr|D3Z9J9|D3Z9J9_RAT Protein Pnpla3 OS=Rattus norvegicus GN=Pnpla3 PE=4 SV=1	45.908	414	0	25372	0	0	0	131580	26385	71408	0	0	0	0	66611	22235	0	0	1141700	666880
D3Z9K2	D3Z9K2		Mrpl54	>tr|D3Z9K2|D3Z9K2_RAT Mitochondrial ribosomal protein L54 (Predicted) OS=Rattus norvegicus GN=Mrpl54 PE=4 SV=1	15.286	135	582210	1272600	1396200	3011800	5258400	4562800	690510	833820	577440	4938200	3922900	5018100	345100	441300	2959200	2261500	8703000	152930
D3Z9K4	D3Z9K4		Plekho2	>tr|D3Z9K4|D3Z9K4_RAT Protein Plekho2 OS=Rattus norvegicus GN=Plekho2 PE=4 SV=2	54.007	494	0	0	584920	0	487250	180340	0	0	0	395860	496020	436300	0	0	0	485880	141730	494540
D3Z9L0	D3Z9L0		Agk	>tr|D3Z9L0|D3Z9L0_RAT Protein Agk OS=Rattus norvegicus GN=Agk PE=4 SV=1	46.768	421	1256900	2387300	12533000	21108000	3724300	12916000	2031900	2569300	9805100	30458000	11542000	13437000	1310700	1330800	18307000	13178000	19047000	13284000
D3Z9L5	D3Z9L5		Wdr11	>tr|D3Z9L5|D3Z9L5_RAT Protein Wdr11 OS=Rattus norvegicus GN=Wdr11 PE=4 SV=1	135.77	1224	17559	47357	610940	1262900	404210	1016400	33570	13948	479410	777280	500240	716770	99156	67858	626250	514780	903600	550190
D3Z9N3	D3Z9N3		Lars2	>tr|D3Z9N3|D3Z9N3_RAT Leucyl-tRNA synthetase, mitochondrial (Predicted) OS=Rattus norvegicus GN=Lars2 PE=4 SV=1	79.678	714	401030	545110	3101400	4067500	452820	1361700	195260	205750	2149400	2945400	1168100	1704500	220930	156670	10951000	2544600	2021400	814780
D3Z9P1	D3Z9P1		Kdsr	>tr|D3Z9P1|D3Z9P1_RAT Follicular lymphoma variant translocation 1 (Predicted), isoform CRA_a OS=Rattus norvegicus GN=Kdsr PE=3 SV=1	36.036	332	604710	1697200	4334200	6885300	2162800	6848300	700930	1215000	3797700	9455300	6789300	6131200	845890	153480	7343300	8735400	7182700	9068200
D3Z9R8	D3Z9R8	6.8 kDa mitochondrial proteolipid	Mp68	>sp|D3Z9R8|68MP_RAT 6.8 kDa mitochondrial proteolipid OS=Rattus norvegicus GN=Mp68 PE=1 SV=1	6.9142	60	12342000	39512000	114210000	0	2575700	1035900	18984000	29017000	158250000	4028600	1912900	150950	22601000	12391000	129820000	7189000	204900	44926
D3Z9U2	D3Z9U2		Cd163	>tr|D3Z9U2|D3Z9U2_RAT CD163 antigen (Predicted) OS=Rattus norvegicus GN=Cd163 PE=4 SV=1	120.72	1120	261130	365730	2521100	2720600	2718700	4239200	243200	237790	5130400	7240400	2529600	3604200	121630	187910	2485400	2783200	3204500	2562000
D3Z9X1	D3Z9X1			>tr|D3Z9X1|D3Z9X1_RAT Uncharacterized protein (Fragment) OS=Rattus norvegicus PE=3 SV=2	55.496	521	0	0	0	0	33583	0	0	0	181760	0	0	0	0	0	0	0	0	0
D3Z9Z0	D3Z9Z0		Ank1	>tr|D3Z9Z0|D3Z9Z0_RAT Ankyrin 1, erythroid OS=Rattus norvegicus GN=Ank1 PE=4 SV=1	187.12	1707	577840	235670	3244300	3287600	4315500	9513500	1663100	546110	14051000	3446400	3960000	6963400	433930	260490	1904100	5360500	3631400	657020
D3Z9Z2	D3Z9Z2	Putative lipoyltransferase 2, mitochondrial	Lipt2	>tr|D3Z9Z2|D3Z9Z2_RAT Putative lipoyltransferase 2, mitochondrial OS=Rattus norvegicus GN=Lipt2 PE=3 SV=1	25.197	231	0	0	428120	621540	0	0	0	0	910470	1594500	788930	706830	0	0	409580	428610	419010	0
D3ZA22	D3ZA22		Trim47	>tr|D3ZA22|D3ZA22_RAT Protein Trim47 OS=Rattus norvegicus GN=Trim47 PE=4 SV=1	70.027	642	114940	184190	422090	1941100	1950100	2012000	44784	68530	489370	2391000	874550	982840	73274	57196	1373000	1596700	1323400	1501500
D3ZA31	D3ZA31		Mtmr2	>tr|D3ZA31|D3ZA31_RAT Myotubularin related protein 2 (Predicted), isoform CRA_b OS=Rattus norvegicus GN=Mtmr2 PE=4 SV=1	73.271	643	54681	0	872160	1633600	574720	742410	0	0	809990	1138200	763380	548420	0	0	0	653690	729010	686190
D3ZA32	D3ZA32		Gsdma	>tr|D3ZA32|D3ZA32_RAT Protein Gsdma OS=Rattus norvegicus GN=Gsdma PE=4 SV=1	49.814	446	0	0	686390	180550	0	1437000	101640	5325.6	480060	267380	223160	560050	8925.1	4578.6	467640	383070	182000	392070
D3ZA69	D3ZA69		Nrbp2	>tr|D3ZA69|D3ZA69_RAT Protein Nrbp2 OS=Rattus norvegicus GN=Nrbp2 PE=4 SV=1	56.312	491	0	0	0	0	115750	83678	0	0	103350	531300	784760	46258	0	0	39326	319910	0	0
D3ZA84;D4A3B0;D3ZT58;D3ZE09	D3ZA84;D4A3B0;D3ZT58;D3ZE09		Tln2	>tr|D3ZA84|D3ZA84_RAT Protein Tln2 OS=Rattus norvegicus GN=Tln2 PE=4 SV=2;>tr|D4A3B0|D4A3B0_RAT Protein Tln2 OS=Rattus norvegicus GN=Tln2 PE=4 SV=2;>tr|D3ZT58|D3ZT58_RAT Protein Tln2 OS=Rattus norvegicus GN=Tln2 PE=4 SV=2;>tr|D3ZE09|D3ZE09_RAT Protein Tln2	237.36	2221	92314	326370	2772200	1865500	389180	1590700	107590	230630	1870400	1748100	971710	1513700	80921	176370	2702100	1799600	1972400	957890
D3ZA85	D3ZA85		Nfu1	>tr|D3ZA85|D3ZA85_RAT Histone cell cycle regulation defective interacting protein 5 (Predicted), isoform CRA_a OS=Rattus norvegicus GN=Nfu1 PE=4 SV=1	28.367	253	2606500	1766600	15100000	8894400	9715300	8129700	2852700	4939400	16906000	28325000	11999000	17458000	2763200	1143700	14202000	12304000	5533300	453490
D3ZA93	D3ZA93		Acot13	>tr|D3ZA93|D3ZA93_RAT Protein Acot13 OS=Rattus norvegicus GN=Acot13 PE=4 SV=1	15.27	140	3582400	12247000	76670000	93406000	77714000	71907000	15454000	15135000	113090000	148150000	61399000	72982000	10892000	8705900	92971000	79989000	92866000	6670400
D3ZAA0	D3ZAA0		Praf2	>tr|D3ZAA0|D3ZAA0_RAT PRA1 domain family 2 (Predicted) OS=Rattus norvegicus GN=Praf2 PE=4 SV=2	19.434	178	0	0	2082300	3004400	1381100	887130	0	0	2409800	2667300	1677800	1470600	370100	299680	2019000	1357700	2169400	1698300
D3ZAC0;D3ZXC1	D3ZAC0;D3ZXC1		Itga2b	>tr|D3ZAC0|D3ZAC0_RAT Protein Itga2b OS=Rattus norvegicus GN=Itga2b PE=3 SV=2;>tr|D3ZXC1|D3ZXC1_RAT Protein Itga2b OS=Rattus norvegicus GN=Itga2b PE=4 SV=2	112.64	1034	640570	1154200	9460900	9525500	4817700	11338000	863280	1092300	12365000	16252000	7325500	9580100	519200	346080	5117200	11602000	9980800	5045300
D3ZAF6;D3ZTP1	D3ZAF6	ATP synthase subunit f, mitochondrial	Atp5j2	>sp|D3ZAF6|ATPK_RAT ATP synthase subunit f, mitochondrial OS=Rattus norvegicus GN=Atp5j2 PE=1 SV=1	10.452	88	93726000	109560000	884720000	1612800000	1564300000	870360000	189580000	139010000	920910000	2105500000	743330000	1137400000	155370000	29505000	1110400000	1016100000	1015600000	404820000
D3ZAH3	D3ZAH3		Nedd1	>tr|D3ZAH3|D3ZAH3_RAT Protein Nedd1 OS=Rattus norvegicus GN=Nedd1 PE=1 SV=1	71.244	659	0	0	0	0	61237	0	0	0	0	0	0	0	0	0	0	0	0	0
D3ZAK7;D3ZH46	D3ZAK7;D3ZH46		Ibtk	>tr|D3ZAK7|D3ZAK7_RAT Protein Ibtk OS=Rattus norvegicus GN=Ibtk PE=4 SV=2;>tr|D3ZH46|D3ZH46_RAT Protein Ibtk OS=Rattus norvegicus GN=Ibtk PE=4 SV=2	150.12	1344	0	15835	123130	48272	60080	69245	4246.4	5077.7	154560	227510	0	123950	2242.1	0	0	127650	222050	128670
D3ZAN3	D3ZAN3		Ganab	>tr|D3ZAN3|D3ZAN3_RAT Alpha glucosidase 2 alpha neutral subunit (Predicted) OS=Rattus norvegicus GN=Ganab PE=1 SV=1	90.571	797	20204000	30303000	170580000	234270000	81796000	165720000	17848000	16402000	115920000	195380000	115570000	147610000	15290000	12338000	130820000	174830000	207990000	86513000
D3ZAN4	D3ZAN4		Slc35b4	>tr|D3ZAN4|D3ZAN4_RAT Protein Slc35b4 OS=Rattus norvegicus GN=Slc35b4 PE=4 SV=1	37.438	331	0	0	465460	733170	0	139310	0	0	282190	0	147130	70040	0	0	286240	0	660740	109100
D3ZAP9	D3ZAP9		Gpd1l	>tr|D3ZAP9|D3ZAP9_RAT Protein Gpd1l OS=Rattus norvegicus GN=Gpd1l PE=3 SV=1	38.066	351	3997100	4423600	25548000	18175000	9198200	17164000	2051300	3665100	12694000	26636000	17946000	17974000	2512800	4995500	23575000	16497000	17759000	16586000
D3ZAQ4	D3ZAQ4		Psmg2	>tr|D3ZAQ4|D3ZAQ4_RAT Proteasome assembly chaperone 2 OS=Rattus norvegicus GN=Psmg2 PE=3 SV=1	29.653	264	237730	378010	3129800	4761000	1020300	3559700	0	246490	2761900	5068900	2613000	3959800	160350	194940	7130000	2392800	4050900	5480600
D3ZAR1	D3ZAR1		Ldlrap1	>tr|D3ZAR1|D3ZAR1_RAT Protein Ldlrap1 OS=Rattus norvegicus GN=Ldlrap1 PE=1 SV=2	33.785	306	55190	270470	0	0	0	232910	60935	186240	0	0	0	0	114470	153600	0	0	0	0
D3ZAR3;D3ZDH1	D3ZAR3;D3ZDH1		LOC100361349	>tr|D3ZAR3|D3ZAR3_RAT Uncharacterized protein OS=Rattus norvegicus GN=LOC100361349 PE=4 SV=2;>tr|D3ZDH1|D3ZDH1_RAT Protein Sprr2g OS=Rattus norvegicus GN=Sprr2g PE=4 SV=2	8.8555	81	406360	0	29529000	12917000	1863100	9944400	676550	1607900	14599000	22750000	6032200	7269500	0	235620	22701000	24225000	11681000	8723800
D3ZAR8	D3ZAR8		Otub2	>tr|D3ZAR8|D3ZAR8_RAT OTU domain, ubiquitin aldehyde binding 2 (Predicted), isoform CRA_a OS=Rattus norvegicus GN=Otub2 PE=4 SV=1	27.258	234	564080	1392000	7472400	11601000	4340100	18583000	462100	159770	4839400	3581700	2311700	4945600	1046100	662840	9761300	9191900	12806000	84873
D3ZAS1;F1M5X9	D3ZAS1;F1M5X9		RGD1562399	>tr|D3ZAS1|D3ZAS1_RAT Uncharacterized protein OS=Rattus norvegicus GN=RGD1562399 PE=3 SV=2;>tr|F1M5X9|F1M5X9_RAT Uncharacterized protein OS=Rattus norvegicus GN=RGD1562399 PE=4 SV=2	28.5	265	13746000	9537100	93850000	51846000	0	110130000	8408000	15356000	36492000	84163000	39420000	75463000	7978600	5830600	68509000	42889000	90184000	83635000
D3ZAS7	D3ZAS7		Pabpc1l	>tr|D3ZAS7|D3ZAS7_RAT Protein Pabpc1l OS=Rattus norvegicus GN=Pabpc1l PE=4 SV=2	67.488	607	123820	142180	598440	359910	0	0	173150	127290	563780	628030	0	0	171100	205840	524980	987460	0	0
D3ZAS8	D3ZAS8		Sart3	>tr|D3ZAS8|D3ZAS8_RAT Protein Sart3 OS=Rattus norvegicus GN=Sart3 PE=4 SV=1	109.42	960	52594	337730	1472700	1064100	468460	1350300	130600	254780	1019800	1332400	923910	1313600	108880	131520	935770	1216200	1220800	707920
D3ZAS9	D3ZAS9		Ddrgk1	>tr|D3ZAS9|D3ZAS9_RAT Protein Ddrgk1 OS=Rattus norvegicus GN=Ddrgk1 PE=4 SV=1	38.605	339	1670500	3081300	16437000	22388000	11523000	22647000	384000	2237300	10448000	15787000	15165000	21819000	330360	1416000	29693000	12655000	24207000	35910000
D3ZAW2	D3ZAW2		Pisd	>tr|D3ZAW2|D3ZAW2_RAT Protein Pisd (Fragment) OS=Rattus norvegicus GN=Pisd PE=4 SV=2	43.58	385	1270500	1257800	10843000	11526000	2258600	5931500	630510	1122300	7315800	15733000	6748800	7814400	554820	632470	3542300	4449400	14848000	9230600
D3ZAW4	D3ZAW4		Abhd4	>tr|D3ZAW4|D3ZAW4_RAT Abhydrolase domain containing 4 (Predicted) OS=Rattus norvegicus GN=Abhd4 PE=4 SV=1	40.368	355	135390	170980	644350	1022700	601460	894650	0	157180	602430	1480100	927660	775180	69554	161470	1009100	1313500	2448400	1296100
D3ZAX5	D3ZAX5		Cherp	>tr|D3ZAX5|D3ZAX5_RAT Calcium homeostasis endoplasmic reticulum protein (Predicted) OS=Rattus norvegicus GN=Cherp PE=4 SV=2	105.92	935	95165	64079	77507	214990	59190	120170	81468	83677	119190	115630	84101	155900	38150	88761	123700	133670	0	189690
D3ZAZ0	D3ZAZ0	Eukaryotic translation initiation factor 3 subunit M	Eif3m	>tr|D3ZAZ0|D3ZAZ0_RAT Eukaryotic translation initiation factor 3 subunit M OS=Rattus norvegicus GN=Eif3m PE=3 SV=1	42.516	374	6052300	8394900	54738000	74813000	36015000	70122000	5282800	7292500	41375000	51069000	40174000	40079000	7189700	6660500	86432000	66735000	78882000	100920000
D3ZB55	D3ZB55		Coa5	>tr|D3ZB55|D3ZB55_RAT Protein Coa5 OS=Rattus norvegicus GN=Coa5 PE=4 SV=1	8.3585	74	591070	1067100	1829800	12492000	15252000	21463000	680960	994280	8899800	11347000	7546600	9271100	497160	745760	8515800	1268000	18010000	2428900
D3ZB65	D3ZB65	BRCA2 and CDKN1A-interacting protein	Bccip	>tr|D3ZB65|D3ZB65_RAT BRCA2 and CDKN1A-interacting protein OS=Rattus norvegicus GN=Bccip PE=3 SV=1	35.674	315	338400	0	892290	444340	0	0	142880	207240	0	0	558420	397320	125760	80256	830030	348870	474380	444320
D3ZBC7	D3ZBC7		RGD1305508	>tr|D3ZBC7|D3ZBC7_RAT Protein RGD1305508 (Fragment) OS=Rattus norvegicus GN=RGD1305508 PE=4 SV=2	32.321	294	406580	1074700	1940000	2311300	1109900	4643700	220180	597290	1399600	2817500	3053300	2733300	0	522300	3864700	2132600	4389500	3228800
D3ZBE2;E9PSQ0	D3ZBE2;E9PSQ0		Acacb	>tr|D3ZBE2|D3ZBE2_RAT Protein Acacb OS=Rattus norvegicus GN=Acacb PE=1 SV=2;>tr|E9PSQ0|E9PSQ0_RAT Protein Acacb OS=Rattus norvegicus GN=Acacb PE=1 SV=2	275.93	2458	233110	542360	1889300	2953900	319440	2229600	199980	189890	2005800	3994100	1495100	2678700	731830	284120	5466400	4900000	4434600	2833200
D3ZBE5	D3ZBE5	Serine/threonine-protein kinase Nek7	Nek7	>sp|D3ZBE5|NEK7_RAT Serine/threonine-protein kinase Nek7 OS=Rattus norvegicus GN=Nek7 PE=2 SV=1	34.529	302	0	0	2542100	973040	904150	759110	0	0	1230600	1047800	445830	587890	0	0	1212800	757540	0	639980
D3ZBE6	D3ZBE6		Atp5hl1	>tr|D3ZBE6|D3ZBE6_RAT Protein Atp5hl1 OS=Rattus norvegicus GN=Atp5hl1 PE=4 SV=1	18.678	161	1238600	2925800	6307800	15037000	717100	0	1777700	1449600	6208600	13582000	0	265630	1525400	1172200	11747000	5367000	1344000	0
D3ZBG6	D3ZBG6		Ptrhd1	>tr|D3ZBG6|D3ZBG6_RAT Protein Ptrhd1 OS=Rattus norvegicus GN=Ptrhd1 PE=4 SV=1	16.026	140	381150	593360	2706900	2873900	632380	481700	264150	260470	1033800	0	972930	2209300	277120	94470	0	683920	1588000	271790
D3ZBH7;D3ZAE9	D3ZBH7;D3ZAE9		Abca8	>tr|D3ZBH7|D3ZBH7_RAT Protein Abca8b OS=Rattus norvegicus GN=Abca8 PE=3 SV=2;>tr|D3ZAE9|D3ZAE9_RAT Protein Abca8b OS=Rattus norvegicus GN=Abca8 PE=3 SV=2	175.67	1559	79152	90041	698370	843460	536730	1074600	118760	117060	1174100	2407200	2109000	1863000	236010	61833	1156500	1335900	3189300	954960
D3ZBI1	D3ZBI1		Trim14	>tr|D3ZBI1|D3ZBI1_RAT Protein Trim14 OS=Rattus norvegicus GN=Trim14 PE=4 SV=1	42.846	377	318950	0	3135800	4616100	2535600	1765400	474880	130830	2638700	3382900	2758400	3050500	252770	266820	5590500	2153700	5371900	4514600
D3ZBJ0;D3ZD76	D3ZBJ0		LOC679753	>tr|D3ZBJ0|D3ZBJ0_RAT LSM5 homolog, U6 small nuclear RNA associated (S. cerevisiae) (Predicted), isoform CRA_c OS=Rattus norvegicus GN=LOC679753 PE=4 SV=1	9.9374	91	1294500	2672500	24081000	0	6067100	18191000	1266600	1719500	20085000	20952000	3798400	6481200	0	333630	24877000	14216000	13882000	932110
D3ZBJ3;D4A022	D3ZBJ3;D4A022		Gapvd1	>tr|D3ZBJ3|D3ZBJ3_RAT Protein Gapvd1 OS=Rattus norvegicus GN=Gapvd1 PE=4 SV=2;>tr|D4A022|D4A022_RAT Protein Gapvd1 OS=Rattus norvegicus GN=Gapvd1 PE=4 SV=2	162.36	1457	31979	4169.4	102430	339710	190290	33210	16309	5885	688150	25284	466140	791420	5437	0	286130	253620	517420	334480
D3ZBL6	D3ZBL6		Nup160	>tr|D3ZBL6|D3ZBL6_RAT Protein Nup160 OS=Rattus norvegicus GN=Nup160 PE=4 SV=2	155.52	1379	48007	213420	912250	407910	0	148900	117560	132820	121950	47175	0	111990	77802	10519	587230	83846	0	52150
D3ZBM3	D3ZBM3	Ferrochelatase	Fech	>tr|D3ZBM3|D3ZBM3_RAT Ferrochelatase OS=Rattus norvegicus GN=Fech PE=3 SV=1	47.551	422	2843800	3352100	23403000	27638000	23725000	13676000	3215100	3973700	17321000	25200000	18947000	15573000	1933500	1219700	14971000	18002000	19847000	12071000
D3ZBN0	D3ZBN0	Histone H1.5	Hist1h1b	>sp|D3ZBN0|H15_RAT Histone H1.5 OS=Rattus norvegicus GN=Hist1h1b PE=3 SV=1	22.649	222	1226700	2056000	23359000	6085700	5943400	1072000	1533400	2899700	32916000	2397400	2289400	3877700	3327500	523800	4169100	2323200	3288900	817380
D3ZBN4	D3ZBN4		RGD1310769	>tr|D3ZBN4|D3ZBN4_RAT Protein RGD1310769 OS=Rattus norvegicus GN=RGD1310769 PE=4 SV=1	15.806	140	12877000	26629000	84393000	143180000	98795000	107210000	14224000	17183000	46259000	139170000	70227000	93447000	7428000	5972200	108690000	73093000	98916000	4450100
D3ZBP3	D3ZBP3		Exosc2	>tr|D3ZBP3|D3ZBP3_RAT Exosome component 2 (Predicted) OS=Rattus norvegicus GN=Exosc2 PE=4 SV=1	32.689	293	237700	392200	1004100	1265300	0	0	258520	0	1622300	2583800	1489500	572860	89911	40490	2639100	3053500	948080	787400
D3ZBT7;D4ACR7	D3ZBT7;D4ACR7		Fam8a1	>tr|D3ZBT7|D3ZBT7_RAT Protein Fam8a1 OS=Rattus norvegicus GN=Fam8a1 PE=4 SV=2;>tr|D4ACR7|D4ACR7_RAT Protein Fam8a1 OS=Rattus norvegicus GN=Fam8a1 PE=4 SV=1	37.559	349	0	0	572140	361340	1598.6	372780	0	0	182470	623630	0	51521	0	0	246290	828900	435190	80711
D3ZBW5	D3ZBW5		LOC685203	>tr|D3ZBW5|D3ZBW5_RAT Protein LOC685203 OS=Rattus norvegicus GN=LOC685203 PE=4 SV=1	12.133	107	0	0	0	0	3159100	2903300	0	0	349330	1266600	3932700	6369700	0	0	257460	993850	7754300	0
D3ZBZ9	D3ZBZ9		Ttc33	>tr|D3ZBZ9|D3ZBZ9_RAT Protein Ttc33 OS=Rattus norvegicus GN=Ttc33 PE=4 SV=1	29.318	262	0	0	0	633220	0	651590	0	0	687450	572550	287320	457000	0	0	456450	340810	224390	0
D3ZC28	D3ZC28		Acot3	>tr|D3ZC28|D3ZC28_RAT Protein Acot3 OS=Rattus norvegicus GN=Acot3 PE=4 SV=1	47.271	430	127990	0	1846600	3072300	1763500	1931100	282380	272670	1794900	2789000	2106900	2242200	0	0	2293200	2171600	1667400	1152300
D3ZC50	D3ZC50			>tr|D3ZC50|D3ZC50_RAT Uncharacterized protein OS=Rattus norvegicus PE=4 SV=1	20.122	171	2185900	6967200	28262000	31877000	2434200	57540000	4810200	3475300	30279000	49694000	42288000	51724000	2329700	540670	37556000	54255000	92481000	0
D3ZC56;F1M0Y4;F1M118;F1LU52	D3ZC56;F1M0Y4;F1M118;F1LU52		Dst	>tr|D3ZC56|D3ZC56_RAT Protein Dst (Fragment) OS=Rattus norvegicus GN=Dst PE=1 SV=2;>tr|F1M0Y4|F1M0Y4_RAT Protein Dst (Fragment) OS=Rattus norvegicus GN=Dst PE=1 SV=2;>tr|F1M118|F1M118_RAT Protein Dst (Fragment) OS=Rattus norvegicus GN=Dst PE=1 SV=2;>tr|F1L	828.29	7350	211040	34440	799710	928340	101560	464620	186590	232000	989250	1177200	863050	949080	42455	159420	711050	441110	591870	915790
D3ZC63	D3ZC63		Cmpk2	>tr|D3ZC63|D3ZC63_RAT Protein Cmpk2 OS=Rattus norvegicus GN=Cmpk2 PE=4 SV=2	46.764	417	59852	0	28295000	4996000	2409000	5053100	60978	74257	9879400	6951800	2950700	1432900	0	0	7501300	3788400	4368300	842210
D3ZC81	D3ZC81		Pex10	>tr|D3ZC81|D3ZC81_RAT Protein Pex10 OS=Rattus norvegicus GN=Pex10 PE=4 SV=1	37.112	324	195600	337570	2039600	0	359860	0	205810	169260	0	0	2075400	2912400	181270	165210	0	0	1069700	2248100
D3ZC82;D3ZQG1;M0R4K6	D3ZC82;D3ZQG1;M0R4K6		LOC687994;RGD1564405	>tr|D3ZC82|D3ZC82_RAT Protein Nufip2 OS=Rattus norvegicus GN=LOC687994 PE=4 SV=2;>tr|D3ZQG1|D3ZQG1_RAT Protein Nufip2 OS=Rattus norvegicus GN=LOC687994 PE=4 SV=2;>tr|M0R4K6|M0R4K6_RAT Protein RGD1564405 (Fragment) OS=Rattus norvegicus GN=RGD1564405 PE=4 SV	75.66	691	0	0	806110	648860	280580	598860	0	0	600510	1640300	735640	820280	0	38263	1304600	1568300	1006800	149270
D3ZC84	D3ZC84	Ubiquitin carboxyl-terminal hydrolase	Usp9x	>tr|D3ZC84|D3ZC84_RAT Ubiquitin carboxyl-terminal hydrolase OS=Rattus norvegicus GN=Usp9x PE=3 SV=1	289.44	2547	809100	1260700	8867600	7269800	1781800	7407400	893630	1172900	7866800	8728100	4514800	5764000	691920	688850	7334500	7503900	7046200	2911500
D3ZC89	D3ZC89		Fam114a2	>tr|D3ZC89|D3ZC89_RAT Protein Fam114a2 OS=Rattus norvegicus GN=Fam114a2 PE=4 SV=2	53.836	494	70621	201590	750970	374250	875130	451230	70473	0	783980	952030	672380	1335700	77548	133590	1461000	1238000	0	571220
D3ZC96	D3ZC96	Tetratricopeptide repeat protein 39B	Ttc39b	>sp|D3ZC96|TT39B_RAT Tetratricopeptide repeat protein 39B OS=Rattus norvegicus GN=Ttc39b PE=3 SV=1	70.167	617	93878	222880	1997500	1697300	770510	2324200	63654	75844	2235800	980310	7319000	4599200	127280	0	2137000	2175600	9007400	9608700
D3ZCA0	D3ZCA0		Prosc	>tr|D3ZCA0|D3ZCA0_RAT Proline synthetase co-transcribed (Predicted) OS=Rattus norvegicus GN=Prosc PE=3 SV=1	30.104	275	9383400	13729000	89227000	93702000	23793000	76792000	11609000	11134000	89855000	89599000	55820000	77596000	8379700	6763300	118170000	62672000	74681000	20052000
D3ZCD4;P53812-2;R9PY07;P53812	D3ZCD4;P53812-2;R9PY07;P53812	Phosphatidylinositol transfer protein beta isoform	Pitpnb	>tr|D3ZCD4|D3ZCD4_RAT Phosphatidylinositol transfer protein beta isoform (Fragment) OS=Rattus norvegicus GN=Pitpnb PE=4 SV=2;>sp|P53812-2|PIPNB_RAT Isoform 2 of Phosphatidylinositol transfer protein beta isoform OS=Rattus norvegicus GN=Pitpnb;>tr|R9PY07|R9	31.434	271	3512100	5351500	26658000	25348000	6833700	21596000	1066200	2860300	17656000	35353000	9706000	15599000	2897000	3132200	28563000	21279000	18015000	8159900
D3ZCD7;D3ZL21	D3ZCD7;D3ZL21		Tp53rk;LOC685619	>tr|D3ZCD7|D3ZCD7_RAT Protein Tp53rk OS=Rattus norvegicus GN=Tp53rk PE=4 SV=1;>tr|D3ZL21|D3ZL21_RAT Protein LOC685619 (Fragment) OS=Rattus norvegicus GN=LOC685619 PE=4 SV=2	27.427	244	662830	1551700	9796600	6041100	1028400	4884100	812650	1252000	5588900	10331000	5005300	8203700	781280	816820	7392500	7183000	7407600	5593400
D3ZCF5	D3ZCF5	E3 ubiquitin-protein ligase	Smurf1	>tr|D3ZCF5|D3ZCF5_RAT E3 ubiquitin-protein ligase OS=Rattus norvegicus GN=Smurf1 PE=4 SV=2	83.099	728	0	278090	0	0	875360	0	0	0	0	0	0	0	0	154010	0	754630	0	1339000
D3ZCG3;D3ZKH2;M0RDR3	D3ZCG3;D3ZKH2		Mon2	>tr|D3ZCG3|D3ZCG3_RAT Protein Mon2 (Fragment) OS=Rattus norvegicus GN=Mon2 PE=4 SV=2;>tr|D3ZKH2|D3ZKH2_RAT Protein Mon2 (Fragment) OS=Rattus norvegicus GN=Mon2 PE=4 SV=2	187.57	1701	188340	432870	1621500	1799800	1083600	1712300	223750	286810	1813400	2302700	1268700	1701600	281650	281550	2306800	1571500	2537300	1046300
D3ZCG4	D3ZCG4		Spag7	>tr|D3ZCG4|D3ZCG4_RAT Protein Spag7 OS=Rattus norvegicus GN=Spag7 PE=4 SV=1	26.021	227	0	0	0	908180	0	929060	0	0	520740	1449600	730790	1000000	0	0	579060	1374600	1094800	0
D3ZCH5	D3ZCH5		LOC100359763	>tr|D3ZCH5|D3ZCH5_RAT Protein LOC100359763 OS=Rattus norvegicus GN=LOC100359763 PE=4 SV=1	13.914	126	0	0	0	0	0	0	0	0	0	0	0	0	0	0	0	0	0	655960
D3ZCH7;G3V9D7;Q62847-2;Q62847	D3ZCH7;G3V9D7;Q62847-2;Q62847	Gamma-adducin	Add3	>tr|D3ZCH7|D3ZCH7_RAT Adducin 3 (Gamma), isoform CRA_b OS=Rattus norvegicus GN=Add3 PE=4 SV=2;>tr|G3V9D7|G3V9D7_RAT Adducin 3 (Gamma), isoform CRA_a OS=Rattus norvegicus GN=Add3 PE=4 SV=1;>sp|Q62847-2|ADDG_RAT Isoform 1 of Gamma-adducin OS=Rattus norvegicu	75.375	673	89202	333870	1554800	3762700	949300	4290300	425680	467380	1416100	3018300	1101600	2434500	130050	78083	1011100	1217700	1069600	3001800
D3ZCI0;Q63060;Q68FP7;D3Z8F7	D3ZCI0;Q63060	Glycerol kinase	Gk	>tr|D3ZCI0|D3ZCI0_RAT Glycerol kinase OS=Rattus norvegicus GN=Gk PE=3 SV=2;>sp|Q63060|GLPK_RAT Glycerol kinase OS=Rattus norvegicus GN=Gk PE=2 SV=1	57.462	524	23433000	30551000	158350000	135210000	100250000	124230000	18796000	19761000	94677000	112580000	83047000	75690000	11249000	18136000	83273000	88820000	102240000	83269000
D3ZCI5	D3ZCI5		Stxbp6	>tr|D3ZCI5|D3ZCI5_RAT Protein Stxbp6 OS=Rattus norvegicus GN=Stxbp6 PE=4 SV=2	23.671	210	0	0	0	2087500	0	0	0	0	349800	2160400	419460	756480	0	0	0	1455600	548250	0
D3ZCL3	D3ZCL3	U1 small nuclear ribonucleoprotein C	Snrpc	>sp|D3ZCL3|RU1C_RAT U1 small nuclear ribonucleoprotein C OS=Rattus norvegicus GN=Snrpc PE=3 SV=1	17.364	159	327550	1075800	3353500	2587800	2110500	2529500	519880	1216300	2866500	5722900	990220	2904900	503170	184170	3523300	1661100	227880	624460
D3ZCM4	D3ZCM4		Dnajc15	>tr|D3ZCM4|D3ZCM4_RAT DnaJ (Hsp40) homolog, subfamily C, member 15 (Predicted), isoform CRA_a OS=Rattus norvegicus GN=Dnajc15 PE=4 SV=1	15.991	149	0	0	350990	671770	0	0	0	0	0	1081600	193210	409960	0	0	676040	600240	617920	0
D3ZCQ2	D3ZCQ2		Alg11	>tr|D3ZCQ2|D3ZCQ2_RAT Protein Alg11 OS=Rattus norvegicus GN=Alg11 PE=4 SV=1	55.382	492	127340	259010	275240	2093400	250660	709250	0	218590	0	1337500	741820	732320	0	0	1617700	0	585210	0
D3ZCS9	D3ZCS9		LOC100911028	>tr|D3ZCS9|D3ZCS9_RAT Protein LOC100911028 OS=Rattus norvegicus GN=RGD1309350 PE=3 SV=1	16.01	141	58881000	92331000	400550000	622750000	282970000	247190000	49768000	67485000	288120000	318330000	148510000	168510000	57258000	41584000	362150000	269990000	326230000	166890000
D3ZCT5	D3ZCT5		Pald1	>tr|D3ZCT5|D3ZCT5_RAT Protein Pald1 OS=Rattus norvegicus GN=Pald1 PE=4 SV=1	96.821	857	0	0	450450	0	0	0	0	0	119840	107270	0	0	0	0	295020	0	144290	0
D3ZCT7	D3ZCT7		Sec23b	>tr|D3ZCT7|D3ZCT7_RAT SEC23B (S. cerevisiae) (Predicted), isoform CRA_b OS=Rattus norvegicus GN=Sec23b PE=4 SV=1	50.381	453	2146700	2675900	16403000	37235000	11777000	17861000	1384000	530260	17079000	17818000	6124000	12809000	2206900	2444200	14972000	20056000	26696000	11708000
D3ZCV5	D3ZCV5		Aldh1a7	>tr|D3ZCV5|D3ZCV5_RAT Aldehyde dehydrogenase, cytosolic 1 OS=Rattus norvegicus GN=Aldh1a7 PE=3 SV=2	54.626	495	0	0	853530	1113800	0	246880	0	0	724250	587180	0	0	0	0	1653900	0	0	0
D3ZCW5	D3ZCW5		Alg9	>tr|D3ZCW5|D3ZCW5_RAT Asparagine-linked glycosylation 9 homolog (Yeast, alpha 1,2 mannosyltransferase) (Predicted) OS=Rattus norvegicus GN=Alg9 PE=4 SV=1	47.731	429	0	0	644540	509600	5967.6	664970	0	0	0	0	528660	129250	0	0	0	0	1620000	246290
D3ZCZ9;G3V8B9	D3ZCZ9;G3V8B9		LOC100912599;Ndufs6	>tr|D3ZCZ9|D3ZCZ9_RAT Protein LOC100912599 OS=Rattus norvegicus GN=LOC100912599 PE=4 SV=1;>tr|G3V8B9|G3V8B9_RAT NADH dehydrogenase [ubiquinone] iron-sulfur protein 6, mitochondrial OS=Rattus norvegicus GN=Ndufs6 PE=4 SV=1	13.04	116	24655000	66011000	102810000	564350000	362710000	233940000	80021000	85107000	156490000	489460000	203810000	188210000	59517000	33304000	421490000	420690000	158950000	79708000
D3ZD03	D3ZD03	Tyrosine-protein kinase	Tyk2	>tr|D3ZD03|D3ZD03_RAT Tyrosine-protein kinase OS=Rattus norvegicus GN=Tyk2 PE=3 SV=1	133.29	1186	0	0	59676	0	25250	0	0	0	58487	0	0	0	0	0	83661	0	0	26522
D3ZD09	D3ZD09		Cox6b1	>tr|D3ZD09|D3ZD09_RAT Cytochrome c oxidase subunit 6B1 OS=Rattus norvegicus GN=LOC681754 PE=4 SV=1	10.071	86	62541000	148120000	478140000	1160400000	850810000	875590000	105230000	135210000	562770000	1620000000	620140000	1032500000	96538000	72822000	625470000	788860000	1042500000	263520000
D3ZD11	D3ZD11		Spcs2	>tr|D3ZD11|D3ZD11_RAT Protein Spcs2 OS=Rattus norvegicus GN=Spcs2 PE=4 SV=1	24.973	226	3576400	10078000	31979000	32944000	8952600	29662000	7752900	6279300	35019000	45604000	27739000	27153000	6146300	2634700	31575000	14961000	33285000	749690
D3ZD19	D3ZD19		Lyve1	>tr|D3ZD19|D3ZD19_RAT Extracellular link domain-containing 1 (Predicted) OS=Rattus norvegicus GN=Lyve1 PE=4 SV=1	37.267	343	2906700	5121500	29100000	26893000	27349000	25905000	2487200	7257700	14122000	30464000	23364000	20755000	954940	2713500	25058000	18254000	38568000	20809000
D3ZD23;M0RAG2	D3ZD23		Abce1	>tr|D3ZD23|D3ZD23_RAT ATP-binding cassette, sub-family E (OABP), member 1 OS=Rattus norvegicus GN=Abce1 PE=3 SV=1	67.3	599	4222200	3959600	32340000	44338000	32275000	45560000	4158500	4668000	29299000	40738000	23020000	26451000	2540200	2251500	54003000	41355000	35592000	26278000
D3ZD29	D3ZD29		Ado	>tr|D3ZD29|D3ZD29_RAT Protein Ado (Fragment) OS=Rattus norvegicus GN=Ado PE=4 SV=2	22.226	198	0	0	1094300	1926500	377290	4882500	0	0	993220	0	1173400	806650	0	0	1139900	844010	2365100	972510
D3ZD31	D3ZD31		Mrc1	>tr|D3ZD31|D3ZD31_RAT Mannose receptor, C type 1 (Predicted) OS=Rattus norvegicus GN=Mrc1 PE=4 SV=2	165.86	1463	1773000	3040600	13620000	26623000	7040400	20317000	1780500	3462300	19630000	17495000	13675000	24854000	1921700	1001200	14772000	17785000	16608000	13896000
D3ZD73	D3ZD73		Ddx6	>tr|D3ZD73|D3ZD73_RAT Protein Ddx6 OS=Rattus norvegicus GN=Ddx6 PE=3 SV=1	54.244	483	2911300	3116800	18647000	21533000	7439100	16932000	4168400	3268800	13343000	19308000	11275000	11131000	2571300	2049600	11926000	11567000	11576000	16286000
D3ZD83	D3ZD83		Mfsd10	>tr|D3ZD83|D3ZD83_RAT Protein Mfsd10 OS=Rattus norvegicus GN=Mfsd10 PE=4 SV=1	49.405	456	0	0	337080	770190	0	255930	0	0	500360	99234	207470	530730	0	0	0	0	203760	207810
D3ZD89	D3ZD89		Naa15	>tr|D3ZD89|D3ZD89_RAT NMDA receptor-regulated gene 1 (Predicted), isoform CRA_b OS=Rattus norvegicus GN=Naa15 PE=4 SV=2	101.01	865	996660	1854300	7857600	11093000	5632000	5216600	772030	952900	4285900	7004700	5181000	4214800	968610	1165100	10164000	9120400	13135000	7086900
D3ZD97	D3ZD97		Dhx15	>tr|D3ZD97|D3ZD97_RAT DEAH (Asp-Glu-Ala-His) box polypeptide 15 (Predicted), isoform CRA_b OS=Rattus norvegicus GN=Dhx15 PE=4 SV=1	90.976	795	729580	2683800	8437000	11355000	5053900	11420000	731710	767560	4508900	15419000	4138200	7573300	941330	841970	11430000	7286300	6459800	4375100
D3ZDB9;P86172	D3ZDB9;P86172	NmrA-like family domain-containing protein 1	Nmral1	>tr|D3ZDB9|D3ZDB9_RAT NmrA-like family domain-containing protein 1 OS=Rattus norvegicus GN=Nmral1 PE=4 SV=2;>sp|P86172|NMRL1_RAT NmrA-like family domain-containing protein 1 (Fragments) OS=Rattus norvegicus GN=Nmral1 PE=1 SV=1	33.951	305	7307200	7545400	48630000	44323000	27664000	45944000	6607300	6991000	46299000	41328000	27732000	38559000	4655900	4734000	35249000	32654000	36101000	35225000
D3ZDC1	D3ZDC1		Drg2	>tr|D3ZDC1|D3ZDC1_RAT Protein Drg2 OS=Rattus norvegicus GN=Drg2 PE=4 SV=2	40.718	364	744610	1196300	12407000	18032000	5947900	16694000	1285400	2448400	8045100	11159000	8438500	7183600	1039600	1841200	15023000	10534000	9033100	18096000
D3ZDE4	D3ZDE4		Dguok	>tr|D3ZDE4|D3ZDE4_RAT Deoxyguanosine kinase (Predicted), isoform CRA_a OS=Rattus norvegicus GN=Dguok PE=4 SV=1	32.227	278	9007700	14362000	69815000	69855000	32700000	46915000	11388000	15833000	76086000	105290000	50588000	72191000	7793600	8158200	71581000	73212000	51170000	16975000
D3ZDG0	D3ZDG0		LOC686765	>tr|D3ZDG0|D3ZDG0_RAT Protein LOC681282 OS=Rattus norvegicus GN=LOC681282 PE=4 SV=2	24.598	222	0	1751600	971590	2009500	824420	1597600	0	0	860930	2016700	475560	928350	0	0	0	1039500	2424700	141440
D3ZDI7	D3ZDI7		Ppp2r5a	>tr|D3ZDI7|D3ZDI7_RAT Protein Ppp2r5a OS=Rattus norvegicus GN=Ppp2r5a PE=4 SV=1	56.336	486	1711400	1592900	7896500	10988000	6123300	10053000	1797400	1345000	3029000	14856000	4838600	3623400	1413800	1426400	12150000	10817000	7300900	6739500
D3ZDK7	D3ZDK7		Pgp	>tr|D3ZDK7|D3ZDK7_RAT Protein Pgp OS=Rattus norvegicus GN=Pgp PE=4 SV=1	34.6	321	2093200	3538800	15657000	12625000	10208000	17406000	895430	2837100	11791000	16389000	13222000	12409000	1702600	2158600	15889000	12963000	24562000	25485000
D3ZDM7	D3ZDM7		Ddo	>tr|D3ZDM7|D3ZDM7_RAT Protein LOC100911156 OS=Rattus norvegicus GN=Ddo PE=4 SV=1	37.543	341	78290	204370	2922700	6362900	1224400	2985900	0	99690	3619200	4411200	3055800	1367800	0	123230	4556500	3298600	2839600	1740300
D3ZDP2	D3ZDP2		Ict1	>tr|D3ZDP2|D3ZDP2_RAT Protein Ict1 OS=Rattus norvegicus GN=Ict1 PE=4 SV=1	23.47	206	1520700	3077600	11984000	9769600	9639700	7415500	1288200	1999400	9515800	19983000	7326800	9510900	1350600	1666200	12396000	13759000	11234000	841430
D3ZDR2	D3ZDR2		Chmp6	>tr|D3ZDR2|D3ZDR2_RAT Chromatin modifying protein 6 (Predicted) OS=Rattus norvegicus GN=Chmp6 PE=4 SV=1	23.288	200	603110	1353500	6364000	7894800	4644800	5936600	445490	627750	1992200	7784900	4096900	5381500	540790	532390	7830400	6163300	6542200	7408100
D3ZDT1;D3ZM69;D3ZAY2;D3ZAY7	D3ZDT1;D3ZM69;D3ZAY2;D3ZAY7		Epb41l2	>tr|D3ZDT1|D3ZDT1_RAT Protein Epb41l2 OS=Rattus norvegicus GN=Epb41l2 PE=4 SV=2;>tr|D3ZM69|D3ZM69_RAT Protein Epb41l2 OS=Rattus norvegicus GN=Epb41l2 PE=4 SV=1;>tr|D3ZAY2|D3ZAY2_RAT Protein Epb41l2 OS=Rattus norvegicus GN=Epb41l2 PE=4 SV=2;>tr|D3ZAY7|D3ZAY	101.8	919	18519	2540000	10853000	725510	1067300	10297000	2152500	2762700	10914000	1142300	611620	4476800	2184400	2609200	1806400	942700	1377700	315270
D3ZDV2	D3ZDV2		Eps8l1	>tr|D3ZDV2|D3ZDV2_RAT EPS8-like 1 (Predicted) OS=Rattus norvegicus GN=Eps8l1 PE=4 SV=1	80.085	717	0	0	894890	1269500	560450	1284200	0	0	2161200	883100	690160	2228200	0	0	0	990010	2299400	47505
D3ZDX7	D3ZDX7		Mrpl48	>tr|D3ZDX7|D3ZDX7_RAT Mitochondrial ribosomal protein L48 (Predicted), isoform CRA_c OS=Rattus norvegicus GN=Mrpl48 PE=4 SV=1	24.019	211	603710	864180	2408900	14892000	10575000	6710300	540950	256630	5765500	8552300	5195000	8540700	562910	349370	0	3991900	9183700	12192
D3ZE02	D3ZE02		LOC100361913	>tr|D3ZE02|D3ZE02_RAT Protein LOC100361913 OS=Rattus norvegicus GN=LOC100361913 PE=4 SV=2	10.693	104	153470	393930	2030800	1088600	1358600	2325200	0	201900	1967600	2416400	1496800	2599100	363110	254660	2325100	3211100	3240900	486860
D3ZE15;F1LZC5	D3ZE15;F1LZC5		Ndufa13	>tr|D3ZE15|D3ZE15_RAT Protein LOC100911483 OS=Rattus norvegicus GN=LOC100911483 PE=4 SV=1;>tr|F1LZC5|F1LZC5_RAT Protein Ndufa13 (Fragment) OS=Rattus norvegicus GN=Ndufa13 PE=4 SV=1	16.776	144	21380000	43372000	233040000	332870000	246450000	278260000	46399000	50491000	267960000	542270000	185740000	191030000	34278000	26625000	305420000	311900000	279010000	51195000
D3ZE49;M0R780;M0RBG3	D3ZE49		Trappc12	>tr|D3ZE49|D3ZE49_RAT Protein Trappc12 OS=Rattus norvegicus GN=Trappc12 PE=4 SV=1	87.546	797	0	60479	1348900	553330	654110	919400	56066	0	188100	766290	537240	958090	62892	0	717910	1407500	1746900	1113400
D3ZE59;M0RAY5	D3ZE59;M0RAY5		LOC100910557	>tr|D3ZE59|D3ZE59_RAT Protein LOC100910557 OS=Rattus norvegicus GN=Tmem115 PE=4 SV=1;>tr|M0RAY5|M0RAY5_RAT Protein LOC100910557 OS=Rattus norvegicus GN=LOC100910557 PE=4 SV=1	38.053	350	0	0	721020	1290600	0	1203800	0	0	904440	1220400	154100	544880	0	0	738060	1049300	1778200	215670
D3ZE63	D3ZE63		LOC686548	>tr|D3ZE63|D3ZE63_RAT Protein LOC679748 OS=Rattus norvegicus GN=LOC679748 PE=4 SV=1	12.605	115	0	0	0	0	3122900	6627500	0	0	0	0	3544600	8006300	0	0	0	0	26911000	0
D3ZE72	D3ZE72	Methionine aminopeptidase	Metap1	>tr|D3ZE72|D3ZE72_RAT Methionine aminopeptidase 1 OS=Rattus norvegicus GN=Metap1 PE=3 SV=1	43.205	386	880170	1260100	1507900	6925100	4259100	5266700	665640	1194800	3112500	6907600	4500500	3629600	1076000	597690	2654300	5708300	5753600	3863700
D3ZEA0	D3ZEA0		Fndc3a	>tr|D3ZEA0|D3ZEA0_RAT Fibronectin type III domain containing 3a (Predicted), isoform CRA_a OS=Rattus norvegicus GN=Fndc3a PE=4 SV=2	128.99	1170	428340	759800	5867200	7040000	5251900	4673500	233370	276450	2443400	5123000	3159500	4114700	296990	228170	4312500	2356600	6432300	3534500
D3ZEA1;D4A9L0;D3ZBU7	D3ZEA1;D4A9L0;D3ZBU7		RGD1310819	>tr|D3ZEA1|D3ZEA1_RAT Protein RGD1310819 OS=Rattus norvegicus GN=RGD1310819 PE=4 SV=2;>tr|D4A9L0|D4A9L0_RAT Protein RGD1310819 OS=Rattus norvegicus GN=RGD1310819 PE=4 SV=1;>tr|D3ZBU7|D3ZBU7_RAT Protein RGD1310819 (Fragment) OS=Rattus norvegicus GN=RGD13108	48.186	455	519230	333720	1246000	0	0	0	0	290080	0	0	935550	0	273130	578940	0	0	0	92572
D3ZEE9	D3ZEE9		Fads6	>tr|D3ZEE9|D3ZEE9_RAT Fatty acid desaturase domain family, member 6 (Predicted) OS=Rattus norvegicus GN=Fads6 PE=4 SV=1	38.757	342	0	190730	3961000	6932900	252430	4098900	256360	131100	4741700	8290500	4264300	8037000	395760	0	8985600	2986300	6386700	3802500
D3ZEG8	D3ZEG8		RGD1309188	>tr|D3ZEG8|D3ZEG8_RAT Protein RGD1309188 OS=Rattus norvegicus GN=RGD1309188 PE=4 SV=1	29.873	267	1621000	2581500	7630300	11564000	7117300	11317000	1825900	3987800	10098000	16730000	15590000	19677000	2504700	2068600	9401600	8350600	22795000	19475000
D3ZEH5	D3ZEH5	SID1 transmembrane family member 2	Sidt2	>sp|D3ZEH5|SIDT2_RAT SID1 transmembrane family member 2 OS=Rattus norvegicus GN=Sidt2 PE=1 SV=2	94.526	832	0	0	210450	361340	60981	400080	0	0	219560	401650	146230	306220	0	0	277590	59672	217710	198430
D3ZEH6	D3ZEH6		Nudt8	>tr|D3ZEH6|D3ZEH6_RAT Protein Nudt8 OS=Rattus norvegicus GN=Nudt8 PE=4 SV=1	23.092	210	3054100	4993800	19634000	20692000	18066000	23458000	2323200	4599400	18068000	39384000	20227000	28965000	2908800	1898300	24346000	18867000	34291000	1019500
D3ZEJ9	D3ZEJ9		RGD1310429	>tr|D3ZEJ9|D3ZEJ9_RAT Protein RGD1310429 OS=Rattus norvegicus GN=RGD1310429 PE=4 SV=1	44.703	395	0	0	0	0	0	0	0	0	0	0	0	0	0	0	0	0	0	0
D3ZEM8	D3ZEM8		Tsr1	>tr|D3ZEM8|D3ZEM8_RAT Protein Tsr1 OS=Rattus norvegicus GN=Tsr1 PE=4 SV=1	92.058	804	74146	57610	456610	2095200	661960	1130600	93961	72765	0	1361300	381870	243840	103530	115410	1083100	1592800	852870	1262600
D3ZEN5	D3ZEN5		Prdx5	>tr|D3ZEN5|D3ZEN5_RAT Peroxiredoxin-5, mitochondrial (Fragment) OS=Rattus norvegicus GN=Prdx5 PE=4 SV=2	16.925	161	0	0	331230	0	0	0	0	0	0	0	168290	153920	0	0	0	0	514050	1014000
D3ZEN7	D3ZEN7			>tr|D3ZEN7|D3ZEN7_RAT Uncharacterized protein (Fragment) OS=Rattus norvegicus PE=4 SV=2	18.408	161	276290	562690	343230	1042200	3704000	14267000	0	137850	1454500	588170	1723100	5264000	0	0	0	411760	14474000	0
D3ZEP5	D3ZEP5		Igkv19-93	>tr|D3ZEP5|D3ZEP5_RAT Uncharacterized protein OS=Rattus norvegicus PE=4 SV=2	12.939	117	122260	0	1081000	2322400	0	2385700	255970	341270	2880600	2591200	1056700	1953500	189740	175660	1807000	1847100	931090	0
D3ZER6	D3ZER6		Tnpo2	>tr|D3ZER6|D3ZER6_RAT Protein Tnpo2 OS=Rattus norvegicus GN=Tnpo2 PE=4 SV=2	102.88	913	0	0	1160400	638700	251060	201400	0	0	1263800	1399100	804180	1347800	0	0	1259300	1920100	2316700	319610
D3ZES2	D3ZES2		Trappc6b	>tr|D3ZES2|D3ZES2_RAT Protein Trappc6b OS=Rattus norvegicus GN=Trappc6b PE=4 SV=1	17.977	158	23560	127890	664700	1197300	627750	144440	0	144570	0	1313100	222740	406760	84515	70818	527730	1128700	641750	226160
D3ZES7;D3ZWP6	D3ZES7;D3ZWP6		Plxna4a;Plxna2	>tr|D3ZES7|D3ZES7_RAT Protein Plxna4a OS=Rattus norvegicus GN=Plxna4a PE=4 SV=1;>tr|D3ZWP6|D3ZWP6_RAT Protein Plxna2 OS=Rattus norvegicus GN=Plxna2 PE=4 SV=1	212.61	1893	30238	0	0	2095200	0	1370500	120700	203970	0	2413800	22434	380300	0	4405.5	1550900	620440	186050	29490
D3ZEU5	D3ZEU5		Uba7	>tr|D3ZEU5|D3ZEU5_RAT Protein Uba7 OS=Rattus norvegicus GN=Uba7 PE=4 SV=1	74.678	676	45225	145040	964540	1098100	48470	556470	20752	43651	1728000	1996900	379810	1190500	87504	112980	3103400	1748400	2009400	425600
D3ZEV0;F1LTA0;F1M1Q9	D3ZEV0		LOC100912427	>tr|D3ZEV0|D3ZEV0_RAT Protein LOC100912427 OS=Rattus norvegicus GN=LOC100912427 PE=4 SV=1	35.717	322	0	0	1017500	0	0	0	0	0	0	0	0	0	0	0	978870	0	1097900	0
D3ZEV8	D3ZEV8		Susd2	>tr|D3ZEV8|D3ZEV8_RAT Protein Susd2 OS=Rattus norvegicus GN=Susd2 PE=4 SV=1	89.67	820	0	0	214450	473720	1157200	769400	0	0	159140	370470	798800	897440	0	0	346810	592540	653690	983230
D3ZEY0	D3ZEY0		LOC311134	>tr|D3ZEY0|D3ZEY0_RAT Protein Ccdc141 OS=Rattus norvegicus GN=Ccdc141 PE=4 SV=2	173.5	1530	0	0	53550	125720	173020	69286	0	0	49849	349640	64596	76065	0	0	145000	103680	220940	61208
D3ZF11	D3ZF11		Lamtor5	>tr|D3ZF11|D3ZF11_RAT Hepatitis B virus x interacting protein (Predicted), isoform CRA_a OS=Rattus norvegicus GN=Lamtor5 PE=4 SV=1	16.39	156	459190	1140300	2457400	3036400	14678000	15516000	640430	773240	3014700	11292000	5042500	5835200	523950	714300	6091400	3712900	12974000	654210
D3ZF12	D3ZF12		Spcs3	>tr|D3ZF12|D3ZF12_RAT Signal peptidase complex subunit 3 OS=Rattus norvegicus GN=Spcs3 PE=4 SV=1	20.327	180	16083000	14907000	61814000	141730000	30131000	82403000	10204000	14947000	62510000	146910000	58599000	82462000	11833000	9442500	101450000	83567000	105560000	1336200
D3ZF13;D3ZZH0	D3ZF13	Acyl carrier protein	LOC683884	>tr|D3ZF13|D3ZF13_RAT Acyl carrier protein OS=Rattus norvegicus GN=LOC683884 PE=3 SV=1	17.514	156	1392100	3360900	8749200	1369900	12025000	20281000	2466200	3015800	12176000	18117000	7053900	4434400	768600	1019400	14265000	4637200	19219000	0
D3ZF16;F1M5Z6	D3ZF16;F1M5Z6		Lmf1	>tr|D3ZF16|D3ZF16_RAT Protein Lmf1 OS=Rattus norvegicus GN=Lmf1 PE=4 SV=2;>tr|F1M5Z6|F1M5Z6_RAT Protein Lmf1 (Fragment) OS=Rattus norvegicus GN=Lmf1 PE=4 SV=2	65.848	574	29938000	517480	5806300	5373000	253250	3197700	220810	303580	1239100	7421100	2929500	2274000	306010	0	11665000	2624000	1821000	2367700
D3ZF26	D3ZF26		Tnks1bp1	>tr|D3ZF26|D3ZF26_RAT Protein Tnks1bp1 OS=Rattus norvegicus GN=Tnks1bp1 PE=1 SV=1	180.01	1705	19023	66456	565030	523670	566470	624870	0	43501	758620	354260	710610	641060	11915	0	523140	694970	450220	543670
D3ZF31;Q5XIA2;Q5XIA2-2	D3ZF31;Q5XIA2;Q5XIA2-2	SUZ domain-containing protein 1	Szrd1	>tr|D3ZF31|D3ZF31_RAT SUZ domain-containing protein 1 OS=Rattus norvegicus GN=Szrd1 PE=4 SV=1;>sp|Q5XIA2|SZRD1_RAT SUZ domain-containing protein 1 OS=Rattus norvegicus GN=Szrd1 PE=2 SV=2;>sp|Q5XIA2-2|SZRD1_RAT Isoform 2 of SUZ domain-containing protein 1 O	14.79	133	0	0	0	0	1972000	1088300	0	0	510550	0	749110	1395000	0	0	0	1377800	2107200	665350
D3ZF39	D3ZF39		Uap1	>tr|D3ZF39|D3ZF39_RAT Protein Uap1 OS=Rattus norvegicus GN=Uap1 PE=4 SV=2	58.394	521	616640	1333500	2914600	3917900	4702700	3250000	668120	938120	3177500	3917300	3117700	2933500	933010	1098400	5021500	3583500	4496900	2632700
D3ZF45	D3ZF45		Larp4b	>tr|D3ZF45|D3ZF45_RAT Protein Larp4b OS=Rattus norvegicus GN=Larp4b PE=4 SV=2	81.084	737	0	0	1012500	19035000	665110	1767400	0	0	2389600	0	691570	449470	48493	0	2428700	3767700	1332600	258480
D3ZF49	D3ZF49		Tmprss6	>tr|D3ZF49|D3ZF49_RAT Protein Tmprss6 OS=Rattus norvegicus GN=Tmprss6 PE=3 SV=1	86.366	772	25405	37998	613830	862180	415210	1077300	16393	22419	259230	760630	624190	981480	30728	12493	538210	371590	1414800	507400
D3ZF54	D3ZF54	Anoctamin	Ano10	>tr|D3ZF54|D3ZF54_RAT Anoctamin OS=Rattus norvegicus GN=Ano10 PE=3 SV=1	77.094	670	35281	98036	2775300	4942100	299020	3274500	94372	128310	2501400	6695000	2068500	2706900	144750	21940	3338700	3214800	4537100	1569400
D3ZF58	D3ZF58		Rfesd	>tr|D3ZF58|D3ZF58_RAT Protein Rfesd OS=Rattus norvegicus GN=Rfesd PE=4 SV=1	17.557	154	166110	0	1260900	630400	1055100	2062800	221350	123360	2533600	1279700	657680	1587400	106170	0	0	979050	319740	0
D3ZF66	D3ZF66		Zswim7	>tr|D3ZF66|D3ZF66_RAT Protein Zswim7 OS=Rattus norvegicus GN=Zswim7 PE=4 SV=2	15.36	140	1102100	1751800	0	0	0	0	925640	1226300	0	0	0	0	1286900	1732300	0	0	0	0
D3ZF77	D3ZF77		Akr1cl	>tr|D3ZF77|D3ZF77_RAT Protein Akr1cl OS=Rattus norvegicus GN=Akr1cl PE=4 SV=1	37.194	324	1315400	3694300	24749000	19378000	5623200	13734000	646500	3516500	23935000	16026000	10554000	12152000	1908600	2761800	11261000	20245000	19466000	20052000
D3ZF89	D3ZF89		Ubap2	>tr|D3ZF89|D3ZF89_RAT Protein Ubap2 OS=Rattus norvegicus GN=Ubap2 PE=4 SV=2	117.6	1126	0	0	0	1088000	342440	551200	0	0	140970	683980	92284	317150	0	0	86585	351320	476250	0
D3ZF97	D3ZF97		Erlec1	>tr|D3ZF97|D3ZF97_RAT Protein Erlec1 OS=Rattus norvegicus GN=Erlec1 PE=4 SV=2	54.665	482	691080	843270	746260	4836700	1869000	2164700	479730	366080	56565	1481900	2395500	3520600	310370	0	632360	1802800	2773100	1492800
D3ZF99	D3ZF99		Mrpl55	>tr|D3ZF99|D3ZF99_RAT Mitochondrial ribosomal protein L55 (Predicted), isoform CRA_b OS=Rattus norvegicus GN=Mrpl55 PE=4 SV=2	15.062	127	636570	1418100	5606900	10507000	5225600	6397000	1051000	1165000	3675000	9657700	2100500	1855500	918940	701880	4021800	5574200	6561200	610890
D3ZFB0	D3ZFB0		Golt1a	>tr|D3ZFB0|D3ZFB0_RAT Protein Golt1a OS=Rattus norvegicus GN=Golt1a PE=4 SV=1	14.827	133	0	0	3830800	3087800	439490	2726800	0	0	2416000	5042000	2594900	2936800	0	0	3407900	3338400	3429000	382500
D3ZFB1	D3ZFB1			>tr|D3ZFB1|D3ZFB1_RAT Protein Plekha6 (Fragment) OS=Rattus norvegicus GN=Plekha6 PE=4 SV=2	65.572	580	0	0	0	279260	134320	158770	0	0	43250	344880	85257	136030	0	0	0	110820	91885	29427
D3ZFB2	D3ZFB2		Luc7l3	>tr|D3ZFB2|D3ZFB2_RAT Protein Luc7l3 OS=Rattus norvegicus GN=Luc7l3 PE=4 SV=1	58.423	491	0	0	100250	70281	0	25393	0	0	571920	309990	28235	15355	0	0	65246	0	0	0
D3ZFC5	D3ZFC5		Atp11c	>tr|D3ZFC5|D3ZFC5_RAT Protein Atp11c OS=Rattus norvegicus GN=Atp11c PE=4 SV=2	129.19	1129	1937500	3122500	29417000	28350000	5257100	24406000	3261400	4404800	26887000	35012000	18030000	24915000	2271300	902300	24790000	27175000	23944000	15423000
D3ZFD0	D3ZFD0		Myo18a	>tr|D3ZFD0|D3ZFD0_RAT Uncharacterized protein OS=Rattus norvegicus GN=Myo18a PE=1 SV=2	232.66	2044	54272	38870	793280	601520	92710	394870	60072	63593	1405400	853360	271700	252800	36033	28423	770920	274450	418570	218760
D3ZFD2	D3ZFD2		Galnt2	>tr|D3ZFD2|D3ZFD2_RAT Protein Galnt2 OS=Rattus norvegicus GN=Galnt2 PE=4 SV=1	53.783	473	2140500	1454100	10841000	14019000	180820	531650	2234500	1658500	20110000	39828000	192920	267240	939900	1265800	12080000	10512000	643600	913470
D3ZFE9;F1M9A4	D3ZFE9;F1M9A4		Mrpl1	>tr|D3ZFE9|D3ZFE9_RAT Protein Mrpl1 OS=Rattus norvegicus GN=Mrpl1 PE=4 SV=2;>tr|F1M9A4|F1M9A4_RAT Uncharacterized protein OS=Rattus norvegicus GN=Mrpl1 PE=4 SV=2	35.987	322	2225300	2295100	16862000	20949000	3189700	13107000	2235300	2377700	10600000	26372000	9696800	18698000	1540600	1747300	22312000	20246000	18116000	16770000
D3ZFF4	D3ZFF4		Lclat1	>tr|D3ZFF4|D3ZFF4_RAT Protein Lclat1 OS=Rattus norvegicus GN=Lclat1 PE=4 SV=1	44.566	376	597210	1067600	5687800	7572700	217120	7861600	542540	609800	4168100	6796800	4830900	5934000	1849800	299230	7672700	1286800	4136100	2206300
D3ZFH5;CON__Q9TRI1	D3ZFH5		Itih2	>tr|D3ZFH5|D3ZFH5_RAT Protein Itih2 OS=Rattus norvegicus GN=Itih2 PE=4 SV=2	106.52	950	1511800	2205500	13025000	19308000	9249900	27254000	2599200	1844800	20000000	14129000	7757800	13729000	2144600	2365700	10574000	23883000	17234000	15176000
D3ZFJ2	D3ZFJ2			>tr|D3ZFJ2|D3ZFJ2_RAT Uncharacterized protein OS=Rattus norvegicus PE=3 SV=1	39.661	343	31151000	46371000	165520000	273930000	238650000	130460000	5452500	26208000	14437000	250600000	105890000	132390000	30513000	44795000	281410000	296730000	183310000	231170000
D3ZFJ3	D3ZFJ3		Sh3bp1	>tr|D3ZFJ3|D3ZFJ3_RAT Protein Sh3bp1 OS=Rattus norvegicus GN=Sh3bp1 PE=4 SV=1	74.851	689	0	0	118900	165700	164190	0	0	0	0	207710	0	54680	0	0	280910	581030	0	34404
D3ZFJ6	D3ZFJ6		Lactb	>tr|D3ZFJ6|D3ZFJ6_RAT Lactamase, beta (Predicted) OS=Rattus norvegicus GN=Lactb PE=4 SV=1	60.42	550	22470000	24356000	74329000	66044000	52430000	108930000	21744000	17522000	63737000	102420000	84675000	81692000	8617100	10306000	147820000	113010000	128240000	106570000
D3ZFK5	D3ZFK5		Spcs1	>tr|D3ZFK5|D3ZFK5_RAT Protein Spcs1 OS=Rattus norvegicus GN=Spcs1 PE=4 SV=2	11.751	102	2134300	7169000	64887000	68902000	12063000	49607000	2050600	1413900	55721000	56345000	57770000	22912000	508280	944020	72264000	58334000	72899000	17844000
D3ZFK8	D3ZFK8		Farp2	>tr|D3ZFK8|D3ZFK8_RAT FERM, RhoGEF and pleckstrin domain protein 2 (Predicted) OS=Rattus norvegicus GN=Farp2 PE=4 SV=1	120.8	1060	20189	75667	875310	1062500	297960	575870	118810	134410	750340	1678300	4778500	5969300	47769	31822	623910	854060	3562400	463810
D3ZFM1	D3ZFM1		Asf1a	>tr|D3ZFM1|D3ZFM1_RAT ASF1 anti-silencing function 1 homolog A (S. cerevisiae) (Predicted), isoform CRA_a OS=Rattus norvegicus GN=Asf1a PE=4 SV=1	22.9	204	276320	447790	1785500	2425800	1367900	2252800	168050	324400	1181900	0	0	0	224100	274390	0	1759000	1259900	0
D3ZFP4	D3ZFP4		Mcm3	>tr|D3ZFP4|D3ZFP4_RAT Protein Mcm3 OS=Rattus norvegicus GN=Mcm3 PE=3 SV=2	91.621	814	0	31998	1538800	1652200	878610	267190	0	7217.4	307920	127350	48012	46309	28312	32918	2777900	1202700	838970	666970
D3ZFQ1	D3ZFQ1		Atxn7l3b	>tr|D3ZFQ1|D3ZFQ1_RAT Protein Atxn7l3b OS=Rattus norvegicus GN=Atxn7l3b PE=4 SV=1	10.744	97	304220	848050	1758100	9796500	1400400	3438900	85183	181600	1691100	7122100	2256400	551940	426180	12920	6782700	3985400	4363100	319600
D3ZFQ3	D3ZFQ3		Nubpl	>tr|D3ZFQ3|D3ZFQ3_RAT Protein Nubpl OS=Rattus norvegicus GN=Nubpl PE=4 SV=1	34.082	319	716760	921210	5950800	4164100	395730	3649800	577620	441690	4615100	4829500	3327700	2614400	313320	261030	5167100	1402800	319990	1919800
D3ZFQ8	D3ZFQ8		Cyc1	>tr|D3ZFQ8|D3ZFQ8_RAT Cytochrome c-1 (Predicted), isoform CRA_b OS=Rattus norvegicus GN=Cyc1 PE=4 SV=2	23.021	217	34156000	48018000	181240000	318980000	161300000	236400000	41316000	54969000	197260000	435010000	206270000	254350000	32750000	24062000	257000000	183450000	278170000	289260000
D3ZFR9	D3ZFR9		Rdh13	>tr|D3ZFR9|D3ZFR9_RAT Protein Rdh13 OS=Rattus norvegicus GN=Rdh13 PE=3 SV=1	36.407	334	1046100	1816100	5868200	8772100	4888800	4932400	1071600	1892000	4629800	9525400	7421000	4613300	1059700	1006000	10614000	9043000	7134700	5764300
D3ZFT1	D3ZFT1		Rfc1	>tr|D3ZFT1|D3ZFT1_RAT Protein Rfc1 OS=Rattus norvegicus GN=Rfc1 PE=4 SV=2	125.78	1131	0	0	178700	0	0	88401	0	0	90845	0	108200	0	0	0	0	0	135590	96162
D3ZFU9	D3ZFU9		Mylk	>tr|D3ZFU9|D3ZFU9_RAT Protein Mylk OS=Rattus norvegicus GN=Mylk PE=4 SV=2	214.91	1961	741960	1261300	3308700	4797600	3775600	4114600	684860	986010	5084400	6672700	4181500	4005000	643890	779020	5174800	4176000	5757700	2737000
D3ZFW1	D3ZFW1		Tsen15	>tr|D3ZFW1|D3ZFW1_RAT Protein Tsen15 OS=Rattus norvegicus GN=Tsen15 PE=4 SV=1	14.007	128	316160	396930	1509000	2921400	3278000	2808500	204270	299990	1390500	2687500	1485200	2193700	308830	237460	1748100	1911500	3059600	0
D3ZFX4	D3ZFX4		Pgm3	>tr|D3ZFX4|D3ZFX4_RAT Phosphoglucomutase 3 (Predicted), isoform CRA_a OS=Rattus norvegicus GN=Pgm3 PE=3 SV=1	60.845	552	2788300	4015200	12066000	18285000	13773000	11445000	1528400	2620800	7975900	18667000	8576600	11606000	2188200	2591800	15580000	10923000	9855800	10647000
D3ZFY0	D3ZFY0		Sephs1	>tr|D3ZFY0|D3ZFY0_RAT Protein Sephs1 OS=Rattus norvegicus GN=Sephs1 PE=4 SV=1	42.892	392	7343800	7093100	36869000	51977000	30859000	25729000	5546300	9767400	21944000	53046000	27223000	25182000	4903300	5998500	20797000	31574000	38361000	30651000
D3ZFY8;F1M227	D3ZFY8		LOC100912618	>tr|D3ZFY8|D3ZFY8_RAT Protein LOC100912618 OS=Rattus norvegicus GN=LOC100912618 PE=4 SV=1	16.355	147	4931200	9646800	54701000	18887000	23544000	11576000	2590100	5771200	47720000	63626000	38375000	47072000	7218900	8010700	3448300	54810000	14144000	60594000
D3ZG00	D3ZG00		Med30	>tr|D3ZG00|D3ZG00_RAT Protein Med30 OS=Rattus norvegicus GN=Med30 PE=4 SV=1	16.346	143	98508	136510	768630	456380	483100	487130	58477	106450	422380	0	0	0	64515	62823	0	531180	0	0
D3ZG07	D3ZG07		LOC100360750	>tr|D3ZG07|D3ZG07_RAT Protein LOC100360750 OS=Rattus norvegicus GN=LOC100360750 PE=4 SV=1	9.1275	80	2800900	5981000	24170000	47801000	14157000	28289000	4285700	6023200	30813000	36880000	14145000	9279600	2726000	3273600	18614000	17550000	20548000	193140
D3ZG37	D3ZG37		Ppp6r1	>tr|D3ZG37|D3ZG37_RAT Protein Ppp6r1 OS=Rattus norvegicus GN=Ppp6r1 PE=1 SV=1	94.938	859	0	88218	945750	1503600	1570800	1334600	16605	0	612410	1371400	889560	1399200	36536	39740	641880	1098600	2311800	1542600
D3ZG43	D3ZG43		Ndufs3	>tr|D3ZG43|D3ZG43_RAT NADH dehydrogenase (Ubiquinone) Fe-S protein 3 (Predicted), isoform CRA_c OS=Rattus norvegicus GN=Ndufs3 PE=3 SV=1	30.226	264	21251000	46746000	221510000	164320000	100590000	259310000	24705000	39874000	175640000	429310000	203620000	184720000	24463000	14465000	269740000	213220000	244000000	157800000
D3ZG78	D3ZG78		Zzef1	>tr|D3ZG78|D3ZG78_RAT Protein Zzef1 OS=Rattus norvegicus GN=Zzef1 PE=4 SV=1	328.09	2924	24453	291220	1010500	234470	157100	261610	98441	97913	926820	1787900	235210	311200	94328	85603	968780	276870	491530	197970
D3ZG88	D3ZG88		Sssca1	>tr|D3ZG88|D3ZG88_RAT Mammary tumor virus receptor 2, isoform CRA_a OS=Rattus norvegicus GN=Sssca1 PE=4 SV=1	21.318	199	736640	1346300	18697000	12093000	16434000	15793000	747140	887260	3640000	25084000	11132000	14141000	1669300	571720	20298000	28607000	24423000	3953400
D3ZGE6;Q66HL2	D3ZGE6;Q66HL2		Cttn	>tr|D3ZGE6|D3ZGE6_RAT Protein Cttn OS=Rattus norvegicus GN=Cttn PE=4 SV=2;>tr|Q66HL2|Q66HL2_RAT Cortactin OS=Rattus norvegicus GN=Cttn PE=1 SV=1	52.682	472	1098400	1921400	5478400	8217600	2912300	5448600	1108200	1322200	2792900	5714300	1914000	2666900	2786600	387050	4882600	4356100	4107200	2273800
D3ZGF8;D4A5A6	D3ZGF8;D4A5A6	DNA-directed RNA polymerase	Polr2a	>tr|D3ZGF8|D3ZGF8_RAT DNA-directed RNA polymerase OS=Rattus norvegicus GN=Polr2a PE=3 SV=1;>tr|D4A5A6|D4A5A6_RAT DNA-directed RNA polymerase OS=Rattus norvegicus GN=Polr2a PE=3 SV=1	213.51	1932	11602	114870	360690	653420	83130	129850	61922	69884	289850	427290	112230	194910	24336	15849	571710	288030	263100	287520
D3ZGK7	D3ZGK7		Ces1c	>tr|D3ZGK7|D3ZGK7_RAT Carboxylesterase 1C OS=Rattus norvegicus GN=Ces1c PE=4 SV=2	60.309	549	833360	724110	1178900	4786700	277860	3337900	512650	229070	3380500	5314600	4444900	3360900	227580	361740	2411400	3398800	4877100	1246400
D3ZGM1	D3ZGM1		Ptcd3	>tr|D3ZGM1|D3ZGM1_RAT Protein Ptcd3 OS=Rattus norvegicus GN=Ptcd3 PE=4 SV=1	77.89	687	622410	852810	3498700	4162100	3442200	3851700	742470	740910	3998900	8486900	5075500	6165600	587650	555190	6231800	8484000	7851800	5298800
D3ZGM5	D3ZGM5		Ccdc167	>tr|D3ZGM5|D3ZGM5_RAT Protein Ccdc167 OS=Rattus norvegicus GN=Ccdc167 PE=4 SV=1	11.401	97	648050	485800	4650900	10421000	15567000	10413000	285990	597820	1160200	6262500	3953900	4770700	874820	260170	3834200	4296200	6378100	335120
D3ZGS2	D3ZGS2		Trrap	>tr|D3ZGS2|D3ZGS2_RAT Protein Trrap OS=Rattus norvegicus GN=Trrap PE=4 SV=2	435.62	3846	56110	69725	229370	48157	157040	895860	57279	83034	120520	364740	1120200	1334800	85999	0	379240	152040	1260800	757090
D3ZGU2	D3ZGU2		Acss3	>tr|D3ZGU2|D3ZGU2_RAT Protein Acss3 OS=Rattus norvegicus GN=Acss3 PE=4 SV=1	54.235	498	12705000	12477000	90669000	83718000	71754000	69519000	12896000	12485000	95725000	130980000	62939000	79167000	6947800	8335400	74539000	69859000	76323000	53152000
D3ZGV2	D3ZGV2		Pex16	>tr|D3ZGV2|D3ZGV2_RAT Protein Pex16 OS=Rattus norvegicus GN=Pex16 PE=4 SV=2	35.482	311	572300	1283100	5731100	8131200	7320300	7349400	573920	754410	2036700	7403800	6457500	7169500	614430	471620	4832400	6297200	9913000	227810
D3ZGW2	D3ZGW2		Ap1g2	>tr|D3ZGW2|D3ZGW2_RAT Protein Ap1g2 OS=Rattus norvegicus GN=Ap1g2 PE=4 SV=1	87.237	785	143380	14721	1822100	177860	0	435750	94695	141350	327810	1645300	136990	482920	53743	107480	301200	498700	452910	125760
D3ZGY1;M0R9W5;M0RBV5;M0R958;M0RB20;M0RCI6	D3ZGY1		Wibg	>tr|D3ZGY1|D3ZGY1_RAT Protein Wibg OS=Rattus norvegicus GN=Wibg PE=4 SV=1	22.726	203	207710	0	18363000	20802000	10953000	25939000	539890	727420	17245000	23925000	4783000	5834800	315190	388550	21546000	37909000	6347300	3406000
D3ZGY2	D3ZGY2		Otud6b	>tr|D3ZGY2|D3ZGY2_RAT OTU domain containing 6B (Predicted), isoform CRA_b OS=Rattus norvegicus GN=Otud6b PE=4 SV=1	37.108	324	2743500	1120100	2324600	2799900	269670	0	901740	2388900	597370	4632000	1042800	3224000	42462	926280	5247500	4251600	4186900	1294700
D3ZH14;D3ZLH7	D3ZH14		LOC100912698	>tr|D3ZH14|D3ZH14_RAT Protein LOC100912698 OS=Rattus norvegicus GN=LOC100912698 PE=4 SV=1	71.68	649	62304	0	465450	1232500	61773	394690	617860	806400	422860	1125100	124950	615180	588550	0	397280	610880	246480	11747
D3ZH25;D4A5F7;D3ZH26	D3ZH25;D4A5F7;D3ZH26		Vps8	>tr|D3ZH25|D3ZH25_RAT Protein Vps8 OS=Rattus norvegicus GN=Vps8 PE=4 SV=2;>tr|D4A5F7|D4A5F7_RAT Protein Vps8 OS=Rattus norvegicus GN=Vps8 PE=4 SV=2;>tr|D3ZH26|D3ZH26_RAT Protein Vps8 OS=Rattus norvegicus GN=Vps8 PE=4 SV=2	158.38	1400	0	0	37693	204780	0	82748	0	0	151530	142150	31558	63368	0	0	112410	89799	100210	35158
D3ZH41	D3ZH41		Ckap4	>tr|D3ZH41|D3ZH41_RAT Cytoskeleton-associated protein 4 (Predicted) OS=Rattus norvegicus GN=Ckap4 PE=4 SV=2	36.315	326	225760	714740	46801000	9264500	5368900	7717500	781770	529650	13003000	5299300	2497800	3962200	763070	160890	4594000	4164300	3018900	5007800
D3ZH75	D3ZH75		Akt1s1	>tr|D3ZH75|D3ZH75_RAT AKT1 substrate 1 (Proline-rich) (Predicted), isoform CRA_d OS=Rattus norvegicus GN=Akt1s1 PE=4 SV=1	27.586	257	314670	716220	1451200	806610	3657000	1808700	106850	456430	1922100	0	2933200	0	380920	372710	5455000	2837300	2132100	2591200
D3ZH98	D3ZH98			>tr|D3ZH98|D3ZH98_RAT Uncharacterized protein OS=Rattus norvegicus PE=3 SV=1	68.856	623	0	0	0	0	0	0	0	0	0	0	0	0	0	0	0	2178000	1305100	0
D3ZHB7	D3ZHB7		Ube3c	>tr|D3ZHB7|D3ZHB7_RAT Protein Ube3c OS=Rattus norvegicus GN=Ube3c PE=4 SV=2	124.35	1085	204360	859510	4002800	5864000	3436200	4406900	230000	671390	3562700	6129700	2803600	3776100	487430	605920	4573200	4400100	5025900	2785200
D3ZHC4	D3ZHC4		Hebp2	>tr|D3ZHC4|D3ZHC4_RAT Heme binding protein 2 (Predicted), isoform CRA_b OS=Rattus norvegicus GN=Hebp2 PE=4 SV=1	22.95	203	20983	253510	1011400	1002400	0	0	35042	384610	708030	224600	301160	862890	53122	36542	418310	1244400	2443300	348390
D3ZHD1	D3ZHD1	Annexin	Anxa13	>tr|D3ZHD1|D3ZHD1_RAT Annexin OS=Rattus norvegicus GN=Anxa13 PE=3 SV=1	36.128	319	90538	209100	253370	369190	365790	0	0	164070	313690	527370	164630	276590	0	0	0	493240	152090	375030
D3ZHD3	D3ZHD3		Pet100	>tr|D3ZHD3|D3ZHD3_RAT Protein Pet100 OS=Rattus norvegicus GN=Pet100 PE=4 SV=1	9.4378	76	0	0	3170900	1271700	22290000	9142100	0	0	7614100	1540900	1763100	5431700	0	0	2888600	44001000	0	7636800
D3ZHF8	D3ZHF8	Translation factor Guf1, mitochondrial	Guf1	>tr|D3ZHF8|D3ZHF8_RAT Translation factor Guf1, mitochondrial OS=Rattus norvegicus GN=Guf1 PE=3 SV=1	73.206	659	0	0	194340	648930	188780	56700	0	0	474570	835000	373480	307970	0	0	527740	394510	170890	203920
D3ZHG0	D3ZHG0		Ptplb	>tr|D3ZHG0|D3ZHG0_RAT Protein Ptplb OS=Rattus norvegicus GN=Ptplb PE=4 SV=2	28.366	254	0	299970	2606900	5922000	0	5514400	196790	96855	3520100	3764600	839200	1153100	0	0	3158900	4013500	6566200	31124
D3ZHI1;D3ZVL1	D3ZHI1;D3ZVL1		LOC100912115	>tr|D3ZHI1|D3ZHI1_RAT Protein LOC100912115 OS=Rattus norvegicus GN=LOC100912115 PE=4 SV=2;>tr|D3ZVL1|D3ZVL1_RAT Protein LOC100912115 OS=Rattus norvegicus GN=LOC100912115 PE=4 SV=2	90.011	796	563250	1183800	3771500	7709100	5560900	5357100	643900	784080	2364400	8420900	4985900	6523400	738430	344610	6033400	8382600	8292500	7296000
D3ZHI6	D3ZHI6		Ctla2a	>tr|D3ZHI6|D3ZHI6_RAT Protein Ctla2a OS=Rattus norvegicus GN=Ctla2a PE=4 SV=1	13.028	113	133080	191580	2055700	0	0	138960	306360	246700	3002900	1687600	98624	0	86722	0	2154500	1448200	0	510320
D3ZHI8	D3ZHI8		Trappc11	>tr|D3ZHI8|D3ZHI8_RAT Protein Trappc11 OS=Rattus norvegicus GN=Trappc11 PE=4 SV=1	128.37	1133	48545	172250	1389700	1309100	288120	644020	46521	25900	686580	1427200	664240	1094200	75245	26070	424630	1397500	1414100	1147000
D3ZHJ3	D3ZHJ3		Sema3b	>tr|D3ZHJ3|D3ZHJ3_RAT Protein Sema3b OS=Rattus norvegicus GN=Sema3b PE=4 SV=1	83.194	749	2050200	3020200	6472300	10627000	358360	0	54293	29985	7310700	10069000	0	0	22863	1661600	11083000	815240	514250	0
D3ZHR2	D3ZHR2		Abcd1	>tr|D3ZHR2|D3ZHR2_RAT ATP-binding cassette, sub-family D (ALD), member 1 (Predicted) OS=Rattus norvegicus GN=Abcd1 PE=3 SV=1	81.937	737	180300	813730	3381700	1127800	1751700	1397400	141420	347230	995770	1104500	1523300	1113600	287450	107100	2788400	1203200	2044500	993390
D3ZHV7	D3ZHV7		Sdsl	>tr|D3ZHV7|D3ZHV7_RAT Protein Sdsl OS=Rattus norvegicus GN=Sdsl PE=4 SV=2	37.894	358	2399500	4775700	19439000	16545000	16738000	12942000	2180000	3737300	14460000	20612000	20749000	17027000	2148800	3082800	12007000	16142000	23700000	28449000
D3ZHW0;F1LSC4	D3ZHW0		Dhx29	>tr|D3ZHW0|D3ZHW0_RAT Protein Dhx29 OS=Rattus norvegicus GN=Dhx29 PE=4 SV=2	154.12	1366	160540	224870	1053200	1830500	586990	1071300	72806	112380	1255600	1301800	629120	997570	189040	129060	2697200	1294600	2485300	1379900
D3ZI16	D3ZI16		Cops6	>tr|D3ZI16|D3ZI16_RAT COP9 (Constitutive photomorphogenic) homolog, subunit 6 (Arabidopsis thaliana) (Predicted), isoform CRA_a OS=Rattus norvegicus GN=Cops6 PE=4 SV=1	37.702	344	2406600	6824000	35014000	40695000	19185000	22641000	2082800	6174000	24899000	21224000	27925000	26747000	3251400	4648100	33418000	26154000	53407000	49790000
D3ZI42	D3ZI42		Lrsam1	>tr|D3ZI42|D3ZI42_RAT Protein Lrsam1 OS=Rattus norvegicus GN=Lrsam1 PE=4 SV=2	83.816	727	228240	338850	0	0	0	0	309600	213510	0	0	0	0	48783	0	0	0	215710	0
D3ZI86	D3ZI86		Chodl	>tr|D3ZI86|D3ZI86_RAT Chondrolectin (Predicted) OS=Rattus norvegicus GN=Chodl PE=4 SV=1	35.509	318	0	0	0	266890	1021900	1057800	0	0	1171700	0	1151400	1888500	0	0	0	840770	1628700	2180400
D3ZIC2;D3ZDW1	D3ZIC2;D3ZDW1		Uroc1	>tr|D3ZIC2|D3ZIC2_RAT Protein Uroc1 OS=Rattus norvegicus GN=Uroc1 PE=3 SV=2;>tr|D3ZDW1|D3ZDW1_RAT Protein Uroc1 OS=Rattus norvegicus GN=Uroc1 PE=3 SV=2	74.691	676	44854000	44230000	290540000	329080000	236760000	278160000	51762000	34341000	366840000	382910000	279700000	285550000	33245000	28914000	270570000	308790000	294460000	270390000
D3ZIF5	D3ZIF5		Ap3b1	>tr|D3ZIF5|D3ZIF5_RAT Adaptor-related protein complex 3, beta 1 subunit (Predicted), isoform CRA_b OS=Rattus norvegicus GN=Ap3b1 PE=4 SV=1	87.764	794	348500	1118900	7384500	6829600	2723900	6972400	490190	719580	5465900	4828500	5423000	4250400	390230	489270	4707900	5881200	6147300	4145300
D3ZIH4	D3ZIH4		Fbxo4	>tr|D3ZIH4|D3ZIH4_RAT F-box only protein 4 (Predicted) OS=Rattus norvegicus GN=Fbxo4 PE=4 SV=2	48.572	431	90430	360110	2075800	2327500	578670	746690	0	0	754040	1255700	607380	774970	74553	79378	1748300	1089800	1510200	760520
D3ZII7	D3ZII7		Yaf2	>tr|D3ZII7|D3ZII7_RAT Protein Yaf2 (Fragment) OS=Rattus norvegicus GN=Yaf2 PE=4 SV=2	14.153	130	0	0	0	271330	96602	0	0	0	48601	313910	0	0	0	0	0	64809	0	0
D3ZII8	D3ZII8		Smyd5	>tr|D3ZII8|D3ZII8_RAT Protein Smyd5 OS=Rattus norvegicus GN=Smyd5 PE=4 SV=2	47.068	417	0	0	4501000	7760600	2105700	7611800	0	0	1694900	4078500	5496600	3000100	0	0	6353800	5832800	8019600	4817100
D3ZIJ5	D3ZIJ5		Dpm3	>tr|D3ZIJ5|D3ZIJ5_RAT Protein LOC100910177 OS=Rattus norvegicus GN=Dpm3 PE=4 SV=1	10.091	92	3277700	6099400	21665000	53004000	47696000	37217000	3319400	3712700	20704000	30894000	19004000	15322000	3450900	2822000	30954000	17587000	30854000	2519000
D3ZIL6	D3ZIL6		Echdc2	>tr|D3ZIL6|D3ZIL6_RAT Enoyl Coenzyme A hydratase domain containing 2 (Predicted), isoform CRA_a OS=Rattus norvegicus GN=Echdc2 PE=3 SV=1	31.779	296	11582000	29286000	172800000	198540000	80016000	142720000	15036000	22538000	156160000	220030000	134000000	144730000	11981000	12643000	174070000	122320000	172440000	156060000
D3ZIL9	D3ZIL9		Dis3l2	>tr|D3ZIL9|D3ZIL9_RAT DIS3-like exonuclease 2 OS=Rattus norvegicus GN=Dis3l2 PE=3 SV=2	98.398	876	83568	65011	1487800	2099500	1114400	1046100	54798	26043	1754600	1915200	729480	1192500	139850	81918	1715900	1990300	1125200	899730
D3ZIN5	D3ZIN5		Vwa8	>tr|D3ZIN5|D3ZIN5_RAT Protein Vwa8 (Fragment) OS=Rattus norvegicus GN=Vwa8 PE=4 SV=2	150.28	1340	3186900	5865500	29354000	47325000	13161000	33642000	5083400	40066000	50243000	63409000	36154000	52658000	5117800	4265300	33163000	179370000	44119000	28686000
D3ZIN7	D3ZIN7		Mrps23	>tr|D3ZIN7|D3ZIN7_RAT Mitochondrial ribosomal protein S23 (Predicted), isoform CRA_b OS=Rattus norvegicus GN=Mrps23 PE=4 SV=1	20.321	177	4708500	5683300	20026000	21307000	23090000	15388000	3206100	4486600	17192000	28155000	16434000	15618000	3606000	3491300	31238000	31779000	28872000	6685900
D3ZIP3;D3ZKF7;D4A9A6;D4A6Q4	D3ZIP3;D3ZKF7;D4A9A6		Epb4.1	>tr|D3ZIP3|D3ZIP3_RAT Protein Epb4.1 OS=Rattus norvegicus GN=Epb4.1 PE=4 SV=1;>tr|D3ZKF7|D3ZKF7_RAT Protein Epb4.1 OS=Rattus norvegicus GN=Epb4.1 PE=4 SV=1;>tr|D4A9A6|D4A9A6_RAT Protein Epb4.1 OS=Rattus norvegicus GN=Epb4.1 PE=4 SV=2	95.667	855	559190	753620	8326800	7378600	3390500	11222000	1928100	1099000	10234000	12371000	7593600	6980100	826460	476360	8942700	7711600	7632000	4740500
D3ZIQ1	D3ZIQ1		Acot4	>tr|D3ZIQ1|D3ZIQ1_RAT Protein Acot4 OS=Rattus norvegicus GN=Acot4 PE=4 SV=1	46.355	421	308910	287250	5804300	11379000	4943300	8626100	477740	827150	1999400	10451000	11006000	8940700	483310	770340	2297400	5983600	10657000	9948900
D3ZIS5	D3ZIS5		Cox19	>tr|D3ZIS5|D3ZIS5_RAT Protein Cox19 OS=Rattus norvegicus GN=Cox19 PE=4 SV=1	10.864	92	699810	446820	1672400	5289200	3360700	3030500	1029800	1109100	1614900	13212000	1230300	1177200	561860	288600	9761400	3949300	3337900	839050
D3ZIT7	D3ZIT7		RGD1308908	>tr|D3ZIT7|D3ZIT7_RAT Uncharacterized protein OS=Rattus norvegicus GN=Ints1 PE=4 SV=2	83.841	751	0	0	127770	173300	0	0	0	0	0	83644	0	0	0	0	0	0	99875	0
D3ZIU2	D3ZIU2		Psmg3	>tr|D3ZIU2|D3ZIU2_RAT Protein Psmg3 OS=Rattus norvegicus GN=Psmg3 PE=4 SV=1	13.346	122	695690	2166200	610100	0	5502100	1806500	741820	1258300	0	1028700	0	223850	1580100	874750	7906300	2495100	5456300	1686000
D3ZIV3	D3ZIV3		Mad1l1	>tr|D3ZIV3|D3ZIV3_RAT Protein Mad1l1 OS=Rattus norvegicus GN=Mad1l1 PE=4 SV=1	83.328	717	29676	33072	608970	745100	609030	160210	23496	62660	535590	986650	282600	140240	24435	34193	699400	742720	737430	922660
D3ZIW4	D3ZIW4		Tmem62	>tr|D3ZIW4|D3ZIW4_RAT Protein Tmem62 OS=Rattus norvegicus GN=Tmem62 PE=4 SV=1	72.724	643	0	33417	298890	944590	188890	1666900	0	0	361860	597660	388210	1050700	0	0	1828800	1734000	1913700	1020200
D3ZIX4	D3ZIX4		H1fx	>tr|D3ZIX4|D3ZIX4_RAT Protein H1fx OS=Rattus norvegicus GN=H1fx PE=3 SV=1	20.488	192	0	250830	873860	463400	164660	1112000	178570	248990	1279400	685480	335460	1093800	138310	65425	0	370120	364800	0
D3ZIY3	D3ZIY3		Ythdf3	>tr|D3ZIY3|D3ZIY3_RAT Protein Ythdf3 OS=Rattus norvegicus GN=Ythdf3 PE=4 SV=1	63.934	585	144020	458640	1729000	2603100	144140	4642400	241980	249830	1943300	3964200	2085900	3217000	126160	411850	1733500	3717200	4443800	593200
D3ZJ01	D3ZJ01		RGD1307235	>tr|D3ZJ01|D3ZJ01_RAT Protein RGD1307235 OS=Rattus norvegicus GN=RGD1307235 PE=4 SV=1	134.65	1218	12629	318120	4117800	4484000	241150	310140	400160	512860	5536400	6677000	3050400	47381	288840	257920	4335700	1629600	24786	0
D3ZJ32	D3ZJ32		Esyt2	>tr|D3ZJ32|D3ZJ32_RAT Protein Esyt2 OS=Rattus norvegicus GN=Esyt2 PE=4 SV=2	94.414	845	438580	530780	1902600	2705500	8474100	3021000	251830	482700	2213400	3686000	2357500	3094900	204550	272870	1243400	3241400	3306500	1545600
D3ZJ50	D3ZJ50		Pkp3	>tr|D3ZJ50|D3ZJ50_RAT Plakophilin 3 (Predicted), isoform CRA_a OS=Rattus norvegicus GN=Pkp3 PE=4 SV=1	89.896	822	0	0	292530	0	0	141130	0	0	0	0	1881.6	0	0	0	0	0	7165.8	0
D3ZJ77	D3ZJ77		Cab39	>tr|D3ZJ77|D3ZJ77_RAT Calcium binding protein 39 (Predicted), isoform CRA_a OS=Rattus norvegicus GN=Cab39 PE=4 SV=1	23.671	196	2997200	5689300	25543000	19750000	1474300	19786000	2562400	4508200	15452000	25855000	14177000	13366000	3021100	4049600	22927000	20856000	28174000	17826000
D3ZJ83	D3ZJ83		Sco2	>tr|D3ZJ83|D3ZJ83_RAT Protein Sco2 OS=Rattus norvegicus GN=Sco2 PE=4 SV=1	29.154	257	1774700	1962400	14967000	20203000	10015000	11631000	1820600	1083400	13227000	28803000	10627000	12831000	656930	1391700	31144000	24812000	14768000	127410
D3ZJ92	D3ZJ92		Prpf40a	>tr|D3ZJ92|D3ZJ92_RAT Pre-mRNA processing factor 40 homolog A (Yeast) (Predicted) OS=Rattus norvegicus GN=Prpf40a PE=4 SV=1	108.47	953	24342	422190	794710	93251	234040	234860	40813	83337	374830	666070	364360	208970	119250	15316	558530	292820	218980	0
D3ZJA8	D3ZJA8		Cnep1r1	>tr|D3ZJA8|D3ZJA8_RAT Protein Cnep1r1 OS=Rattus norvegicus GN=Cnep1r1 PE=4 SV=1	14.233	125	290830	464890	2294000	4488100	0	0	229700	388550	1801500	2984800	1255200	0	448290	287810	1477700	2701600	2313500	0
D3ZJB7	D3ZJB7		Slc30a10	>tr|D3ZJB7|D3ZJB7_RAT Protein Slc30a10 OS=Rattus norvegicus GN=Slc30a10 PE=4 SV=1	50.969	472	0	0	808710	1223200	2048800	2052400	0	0	569730	1244700	915760	1236700	0	0	0	1217000	1307900	411590
D3ZJB8	D3ZJB8		Arih2	>tr|D3ZJB8|D3ZJB8_RAT Ariadne homolog 2 (Drosophila) (Predicted), isoform CRA_a OS=Rattus norvegicus GN=Arih2 PE=4 SV=1	57.74	492	0	0	427000	1964900	2048500	803210	0	0	0	0	1647400	1529300	0	0	0	0	1501800	854790
D3ZJE5	D3ZJE5		Zfp706	>tr|D3ZJE5|D3ZJE5_RAT Protein Zfp706 OS=Rattus norvegicus GN=Zfp706 PE=2 SV=2	6.0151	54	3972600	764710	0	0	36877000	28274000	12073000	4902100	16958000	34847000	12394000	21104000	1932400	728950	18409000	27738000	22149000	2385600
D3ZJF9	D3ZJF9		Gla	>tr|D3ZJF9|D3ZJF9_RAT Protein Gla OS=Rattus norvegicus GN=Gla PE=3 SV=2	47.573	420	1687600	2855200	8854500	9731600	6769400	7919200	2049700	3699200	10852000	15814000	10003000	11754000	963800	1504000	3142600	8105900	12064000	11942000
D3ZJH9	D3ZJH9	Malic enzyme	Me2	>tr|D3ZJH9|D3ZJH9_RAT Malic enzyme OS=Rattus norvegicus GN=Me2 PE=3 SV=1	65.351	584	569130	438230	1298000	1964000	1753800	2067600	341680	189680	2658300	1473000	1157400	1078500	122290	570420	1751000	1668300	977990	1076600
D3ZJR1	D3ZJR1		Eps15l1	>tr|D3ZJR1|D3ZJR1_RAT Epidermal growth factor receptor pathway substrate 15-like 1 OS=Rattus norvegicus GN=Eps15l1 PE=2 SV=2	96.445	878	112320	270820	2252800	2254900	2175100	1417800	78337	170590	2363900	2453800	2095900	2762000	212180	23490	2130100	2424300	3894800	2099800
D3ZJR7	D3ZJR7		Dsc2	>tr|D3ZJR7|D3ZJR7_RAT Protein Dsc2 (Fragment) OS=Rattus norvegicus GN=Dsc2 PE=4 SV=2	86.877	779	0	76862	256730	121040	656040	74664	0	0	209820	213280	362610	62583	0	0	164990	209490	230660	0
D3ZJS3	D3ZJS3		Tomm6	>tr|D3ZJS3|D3ZJS3_RAT Protein Tomm6 OS=Rattus norvegicus GN=Tomm6 PE=4 SV=1	7.8938	74	399780	2714300	15714000	24697000	23361000	39705000	2330700	2822700	17185000	58446000	13034000	13694000	1738600	532280	9184600	2493200	38974000	5475200
D3ZJT1	D3ZJT1		Wdr76	>tr|D3ZJT1|D3ZJT1_RAT Protein Wdr76 OS=Rattus norvegicus GN=Wdr76 PE=4 SV=2	68.807	622	0	0	497200	635610	0	314560	0	30640	2849800	349190	271130	531330	314520	229510	354740	0	452550	0
D3ZJT2	D3ZJT2		Nek9	>tr|D3ZJT2|D3ZJT2_RAT Protein Nek9 OS=Rattus norvegicus GN=Nek9 PE=4 SV=2	104.91	958	0	18454	222400	1233000	514670	509670	0	0	156400	810620	300180	566780	37886	0	842070	336510	936470	741890
D3ZJU5	D3ZJU5		Smarcc1	>tr|D3ZJU5|D3ZJU5_RAT Protein Smarcc1 OS=Rattus norvegicus GN=Smarcc1 PE=4 SV=1	120.5	1078	0	0	118110	806280	503440	447530	0	0	135100	760700	347860	375660	0	0	0	857010	690270	682520
D3ZJW3	D3ZJW3		Ppfibp1	>tr|D3ZJW3|D3ZJW3_RAT PTPRF interacting protein, binding protein 1 (Liprin beta 1) (Predicted) OS=Rattus norvegicus GN=Ppfibp1 PE=4 SV=1	101.22	905	0	0	0	282000	384150	306990	0	0	0	452350	610750	1182900	0	0	0	240060	561710	563380
D3ZJX5	D3ZJX5		LOC687295	>tr|D3ZJX5|D3ZJX5_RAT Protein LOC687295 OS=Rattus norvegicus GN=LOC687295 PE=4 SV=2	39.854	353	9789700	19593000	61171000	79603000	40021000	63003000	8309600	16162000	48543000	118370000	71548000	55733000	7811200	8351100	102550000	87834000	92221000	91954000
D3ZJY1	D3ZJY1		Mrpl28	>tr|D3ZJY1|D3ZJY1_RAT Protein Mrpl28 OS=Rattus norvegicus GN=Mrpl28 PE=4 SV=1	30.236	257	1125100	1555000	12945000	10610000	6386400	3424500	1548500	1259300	10589000	12620000	5983500	9006000	769560	566940	14373000	10610000	9227300	2764200
D3ZJZ0	D3ZJZ0		Tmem205	>tr|D3ZJZ0|D3ZJZ0_RAT Protein Tmem205 OS=Rattus norvegicus GN=Tmem205 PE=4 SV=1	21.185	189	17128000	28322000	155600000	270010000	48068000	189070000	15705000	20875000	162620000	265750000	188940000	149220000	19171000	9212800	175290000	196400000	189940000	122260000
D3ZK05	D3ZK05		Gsdmd	>tr|D3ZK05|D3ZK05_RAT Gasdermin domain containing 1 (Predicted), isoform CRA_b OS=Rattus norvegicus GN=Gsdmd PE=4 SV=1	49.603	451	3602900	5577000	26562000	20505000	14932000	21051000	3582100	4171500	29151000	23493000	18958000	20163000	2660600	3502000	16702000	11083000	16826000	21899000
D3ZK56	D3ZK56		Rap2c	>tr|D3ZK56|D3ZK56_RAT Protein Rap2c OS=Rattus norvegicus GN=Rap2c PE=4 SV=2	20.745	183	1246600	1382500	4714800	4618100	2064300	2896500	841650	1068700	6945000	6666700	2045500	3547100	727860	604690	0	2373800	3143600	0
D3ZK73	D3ZK73		Cul4b	>tr|D3ZK73|D3ZK73_RAT Cullin 4B (Predicted) OS=Rattus norvegicus GN=Cul4b PE=3 SV=1	110.81	971	45218	87372	595810	690580	107800	230320	44741	25564	428120	360150	163210	611730	36386	149480	537320	692050	334680	165110
D3ZK76	D3ZK76		RGD1559909	>tr|D3ZK76|D3ZK76_RAT Protein RGD1559909 OS=Rattus norvegicus GN=RGD1559909 PE=4 SV=1	11.322	110	0	0	108500	377830	419540	0	0	0	174490	231970	0	0	0	0	48079	162940	459260	4843.7
D3ZKA0	D3ZKA0		Serpinb13	>tr|D3ZKA0|D3ZKA0_RAT Protein Serpinb13 OS=Rattus norvegicus GN=Serpinb13 PE=3 SV=1	44.249	389	0	0	71486	967910	12335	234260	0	0	335520	437350	48691	341220	0	0	110520	0	177590	247130
D3ZKC6	D3ZKC6		Vps13d	>tr|D3ZKC6|D3ZKC6_RAT Protein Vps13d OS=Rattus norvegicus GN=Vps13d PE=4 SV=1	488.95	4374	0	0	102040	369400	1038000	1217400	0	0	306710	496980	895360	725130	0	0	4223000	1445400	571130	95307
D3ZKE6;P0C219	D3ZKE6;P0C219	Sarcolemmal membrane-associated protein	Slmap	>tr|D3ZKE6|D3ZKE6_RAT Sarcolemma associated protein (Predicted) OS=Rattus norvegicus GN=Slmap PE=4 SV=1;>sp|P0C219|SLMAP_RAT Sarcolemmal membrane-associated protein OS=Rattus norvegicus GN=Slmap PE=3 SV=1	90.559	787	0	42223	233570	0	0	0	0	0	0	281450	128680	125720	0	0	0	0	342320	294820
D3ZKG1	D3ZKG1		Mut	>tr|D3ZKG1|D3ZKG1_RAT Protein Mut OS=Rattus norvegicus GN=Mut PE=4 SV=1	82.924	748	7978000	10485000	72136000	78740000	42233000	46179000	13538000	13482000	92842000	125220000	83775000	73188000	8147900	7922800	74136000	65482000	74904000	55019000
D3ZKG5	D3ZKG5		Parvb	>tr|D3ZKG5|D3ZKG5_RAT Protein Parvb OS=Rattus norvegicus GN=Parvb PE=4 SV=1	41.701	365	100640	125300	1798500	2762000	545560	1773700	123050	114510	1944700	4113400	1267700	1545900	126350	42873	1894700	2448200	744350	3013200
D3ZKG9;F1M0Y0	D3ZKG9;F1M0Y0	Clustered mitochondria protein homolog	Cluh	>tr|D3ZKG9|D3ZKG9_RAT Clustered mitochondria protein homolog OS=Rattus norvegicus GN=Cluh PE=3 SV=2;>tr|F1M0Y0|F1M0Y0_RAT Clustered mitochondria protein homolog OS=Rattus norvegicus GN=Cluh PE=3 SV=2	151.16	1349	4736600	6487500	42482000	45550000	29111000	34545000	4675000	6019300	32239000	46441000	21365000	33131000	7776900	6751500	55835000	61011000	63914000	41636000
D3ZKH6	D3ZKH6		Rabgap1l	>tr|D3ZKH6|D3ZKH6_RAT Protein Rabgap1l OS=Rattus norvegicus GN=Rabgap1l PE=4 SV=1	92.262	815	0	0	153040	188870	161210	129820	0	0	142820	197580	0	85177	0	0	364500	133830	215970	129610
D3ZKI3	D3ZKI3		Cideb	>tr|D3ZKI3|D3ZKI3_RAT Cell death-inducing DNAation factor, alpha subunit-like effector B (Predicted), isoform CRA_a OS=Rattus norvegicus GN=Cideb PE=4 SV=2	27.949	248	108430	435040	1287400	5331400	2633300	4322300	72950	50941	4013600	4062700	410190	71334	246320	168320	11794000	10762000	465040	429910
D3ZKK5	D3ZKK5		Mtmr1	>tr|D3ZKK5|D3ZKK5_RAT Protein Mtmr1 OS=Rattus norvegicus GN=Mtmr1 PE=4 SV=1	74.514	664	40431	216550	393660	678970	683630	451160	4837.3	102110	408710	881880	383650	412710	106070	48950	220670	61784	696270	222440
D3ZKM4;G3V8K8	D3ZKM4;G3V8K8		Proz	>tr|D3ZKM4|D3ZKM4_RAT Protein Proz OS=Rattus norvegicus GN=Proz PE=3 SV=2;>tr|G3V8K8|G3V8K8_RAT Protein Proz OS=Rattus norvegicus GN=Proz PE=3 SV=2	36.827	332	1100500	436240	444470	2839400	1356300	521270	89302	522970	583560	2861600	370480	0	284240	0	509890	6821100	423640	0
D3ZKR3	D3ZKR3	Glyceraldehyde-3-phosphate dehydrogenase		>tr|D3ZKR3|D3ZKR3_RAT Glyceraldehyde-3-phosphate dehydrogenase OS=Rattus norvegicus PE=3 SV=2	24.848	234	601490	0	10119000	1783100	577890	372050	1018900	1286100	351870	10055000	3457400	2458700	961710	979500	14796000	9985900	5176400	0
D3ZKR8;D3ZKT7	D3ZKR8;D3ZKT7		Tmem167a	>tr|D3ZKR8|D3ZKR8_RAT Protein kish OS=Rattus norvegicus GN=Tmem167a PE=3 SV=1;>tr|D3ZKT7|D3ZKT7_RAT Protein kish OS=Rattus norvegicus GN=Tmem167a PE=3 SV=1	6.7239	60	2197300	4821300	21214000	38852000	15596000	34614000	478370	3781600	18517000	29746000	13699000	6065200	1253900	2513600	14303000	22293000	17015000	0
D3ZKR9	D3ZKR9		Zcchc6	>tr|D3ZKR9|D3ZKR9_RAT Protein Zcchc6 OS=Rattus norvegicus GN=Zcchc6 PE=4 SV=2	169.05	1485	25635	131230	1162100	765470	1303600	707000	0	106560	703730	1582700	800520	1156800	16063	9120.4	1106500	1652400	952460	1235100
D3ZKT0	D3ZKT0		Tamm41	>tr|D3ZKT0|D3ZKT0_RAT Protein Tamm41 OS=Rattus norvegicus GN=Tamm41 PE=4 SV=1	37.785	337	517370	763830	5903500	6448700	8463300	3839400	128570	639400	4448400	5707400	4221200	3610200	360830	329500	5125100	3330600	5578100	4815100
D3ZKT8	D3ZKT8		Hddc2	>tr|D3ZKT8|D3ZKT8_RAT HD domain containing 2 (Predicted), isoform CRA_b OS=Rattus norvegicus GN=Hddc2 PE=4 SV=1	22.988	199	0	94455	6652400	416480	211870	3456500	0	0	4042800	867760	1606300	2349400	0	0	8249800	8462700	1922700	0
D3ZKU7	D3ZKU7	Biogenesis of lysosome-related organelles complex 1 subunit 1	Bloc1s1	>sp|D3ZKU7|BL1S1_RAT Biogenesis of lysosome-related organelles complex 1 subunit 1 OS=Rattus norvegicus GN=Bloc1s1 PE=3 SV=1	14.311	125	845460	821890	2195500	5355600	4276300	4926600	145690	276770	1412800	3966200	689460	3485900	624160	171710	2632100	1644300	5514100	549330
D3ZKX1	D3ZKX1		Ccdc53	>tr|D3ZKX1|D3ZKX1_RAT Protein Ccdc53 OS=Rattus norvegicus GN=Ccdc53 PE=4 SV=1	21.063	194	266840	503280	0	0	0	0	321080	471410	0	0	0	0	424640	239140	0	0	0	0
D3ZL04	D3ZL04		Slc25a45	>tr|D3ZL04|D3ZL04_RAT Protein Slc25a45 OS=Rattus norvegicus GN=Slc25a45 PE=3 SV=2	31.628	288	0	0	0	0	0	411770	0	0	0	0	340440	550020	0	0	1247000	0	228230	836490
D3ZL39	D3ZL39		1110001A16Rik	>tr|D3ZL39|D3ZL39_RAT RCG62056, isoform CRA_a OS=Rattus norvegicus GN=rCG_62056 PE=4 SV=1	9.3278	80	0	0	443250	928470	0	0	0	0	0	0	0	0	0	0	0	0	0	0
D3ZL50;M0R5E7	D3ZL50		Ttc37	>tr|D3ZL50|D3ZL50_RAT Protein Ttc37 OS=Rattus norvegicus GN=Ttc37 PE=4 SV=2	156.16	1403	771870	1245900	8423600	13706000	7043600	7742500	822070	994260	5748300	8042000	4940100	6520400	906530	786520	6627200	7372200	9798200	5289900
D3ZL85	D3ZL85		Hccs	>tr|D3ZL85|D3ZL85_RAT Protein Hccs OS=Rattus norvegicus GN=Hccs PE=4 SV=1	31.129	274	804220	1087600	5328300	3247900	1791500	6754600	862410	1010700	1943700	5513400	4763500	4664100	590830	541430	5400500	4863800	8451400	4027700
D3ZL95;D4A2R6	D3ZL95;D4A2R6	Ubiquitin carboxyl-terminal hydrolase	LOC100911860	>tr|D3ZL95|D3ZL95_RAT Ubiquitin carboxyl-terminal hydrolase OS=Rattus norvegicus GN=LOC100911860 PE=3 SV=1;>tr|D4A2R6|D4A2R6_RAT Ubiquitin carboxyl-terminal hydrolase OS=Rattus norvegicus PE=3 SV=1	140.07	1235	0	0	411560	256370	167240	206890	0	0	389150	110660	168610	94750	0	0	283300	161100	244710	176520
D3ZLA3;D3ZWR4;F1M1L9;Q5BJS7;D4ACG7;F1M0Z3;B5DEX3;D3ZGN2	D3ZLA3		Cpne3	>tr|D3ZLA3|D3ZLA3_RAT Copine 3 protein OS=Rattus norvegicus GN=Cpne3 PE=2 SV=1	59.685	533	5843900	4738200	28804000	35245000	20313000	27032000	4931500	4357500	19958000	38732000	17365000	19401000	3154600	2130700	24380000	30090000	23753000	23469000
D3ZLD5	D3ZLD5		Golga3	>tr|D3ZLD5|D3ZLD5_RAT Protein Golga3 OS=Rattus norvegicus GN=Golga3 PE=4 SV=1	162.54	1447	99862	88866	1163800	2923800	1017700	993080	153140	128880	1476900	2314100	994160	1189300	133960	121240	2178100	2569000	2173900	803290
D3ZLH8	D3ZLH8		Rtf1	>tr|D3ZLH8|D3ZLH8_RAT Protein Rtf1 OS=Rattus norvegicus GN=Rtf1 PE=4 SV=1	49.137	429	0	0	0	172850	179020	134560	0	0	0	203030	0	0	0	0	0	0	0	0
D3ZLK9;D4AAT7	D3ZLK9;D4AAT7	ATP-dependent (S)-NAD(P)H-hydrate dehydratase	Carkd	>tr|D3ZLK9|D3ZLK9_RAT ATP-dependent (S)-NAD(P)H-hydrate dehydratase OS=Rattus norvegicus GN=Carkd PE=3 SV=1;>sp|D4AAT7|NNRD_RAT ATP-dependent (S)-NAD(P)H-hydrate dehydratase OS=Rattus norvegicus GN=Carkd PE=3 SV=1	34.962	327	7654100	10863000	31851000	44522000	20864000	32910000	7020400	9572100	37490000	76980000	52740000	51301000	2366800	5153600	38330000	34354000	46779000	50396000
D3ZLM5	D3ZLM5		Nhlrc2	>tr|D3ZLM5|D3ZLM5_RAT NHL repeat containing 2 (Predicted) OS=Rattus norvegicus GN=Nhlrc2 PE=4 SV=1	78.561	725	279790	747050	4506400	3432600	3191500	5574300	455940	590110	4906100	3182100	4703400	5773900	289930	613760	5176000	4805500	5512900	4068200
D3ZLM6	D3ZLM6		Dolk	>tr|D3ZLM6|D3ZLM6_RAT Protein Dolk OS=Rattus norvegicus GN=Dolk PE=4 SV=1	59.218	536	0	0	0	0	0	753730	0	0	0	0	0	0	0	0	0	0	0	0
D3ZLN7	D3ZLN7		Commd2	>tr|D3ZLN7|D3ZLN7_RAT COMM domain containing 2 (Predicted), isoform CRA_c OS=Rattus norvegicus GN=Commd2 PE=4 SV=1	22.781	199	2657200	2699800	13020000	16041000	7805500	8236700	1309100	1771200	9229600	17020000	8439900	8596500	1486900	1638500	5524100	11328000	11838000	380080
D3ZLS5;D3ZU64	D3ZLS5		Hectd1	>tr|D3ZLS5|D3ZLS5_RAT Protein Hectd1 OS=Rattus norvegicus GN=Hectd1 PE=4 SV=2	289.97	2619	54296	72217	1411900	1752300	1203900	1413000	20605	62495	636140	922370	672540	945520	79780	85751	2055600	2095700	2486600	1415500
D3ZLT1	D3ZLT1		Ndufb7	>tr|D3ZLT1|D3ZLT1_RAT NADH dehydrogenase (Ubiquinone) 1 beta subcomplex, 7 (Predicted) OS=Rattus norvegicus GN=Ndufb7 PE=4 SV=1	16.568	137	14776000	24425000	81810000	179710000	146470000	154290000	15947000	27100000	75914000	325220000	127610000	173520000	18958000	10986000	118960000	149340000	190310000	23046000
D3ZLU4;B1WC37	D3ZLU4;B1WC37	Mitochondrial tRNA-specific 2-thiouridylase 1	Trmu	>tr|D3ZLU4|D3ZLU4_RAT Mitochondrial tRNA-specific 2-thiouridylase 1 OS=Rattus norvegicus GN=Trmu PE=3 SV=1;>sp|B1WC37|MTU1_RAT Mitochondrial tRNA-specific 2-thiouridylase 1 OS=Rattus norvegicus GN=Trmu PE=2 SV=1	47.298	417	0	128140	1818500	1440500	752680	1044900	0	144260	1112300	1774800	1606300	1369900	219840	175700	1457000	1497800	2061200	1774800
D3ZLX2	D3ZLX2		RGD1311783	>tr|D3ZLX2|D3ZLX2_RAT Protein RGD1311783 OS=Rattus norvegicus GN=RGD1311783 PE=4 SV=1	11.663	106	0	0	614130	3205300	1177000	1404900	0	0	597040	175060	447040	385800	0	0	914880	687360	0	0
D3ZLX3	D3ZLX3		Mob2	>tr|D3ZLX3|D3ZLX3_RAT Protein Mob2 OS=Rattus norvegicus GN=Mob2 PE=4 SV=1	26.824	235	334510	1098000	8679200	3623100	0	6023200	472000	655850	6026700	8543700	2669400	6213400	382860	648500	9560100	6551300	3729700	3531800
D3ZM03;M0RDA8;M0R5E5;M0R3M6	D3ZM03;M0RDA8;M0R5E5;M0R3M6		LOC100912478	>tr|D3ZM03|D3ZM03_RAT Protein LOC100912478 OS=Rattus norvegicus GN=LOC100912478 PE=4 SV=1;>tr|M0RDA8|M0RDA8_RAT Protein LOC100912478 OS=Rattus norvegicus GN=LOC100912478 PE=4 SV=1;>tr|M0R5E5|M0R5E5_RAT Protein LOC100912478 OS=Rattus norvegicus GN=LOC100912	11.381	101	1782900	3192100	22182000	17809000	28727000	47147000	1060000	73409	7837500	35016000	25662000	8552500	2218300	0	38924000	2310700	26541000	989670
D3ZM07	D3ZM07		Fam195a	>tr|D3ZM07|D3ZM07_RAT Protein Fam195a OS=Rattus norvegicus GN=Fam195a PE=4 SV=1	17.918	160	0	0	4727400	7442400	3290500	2475100	0	0	2980800	5011900	1020400	3288700	324710	374230	4040000	5778100	7125400	112940
D3ZM09	D3ZM09		Sars2	>tr|D3ZM09|D3ZM09_RAT Protein Sars2 OS=Rattus norvegicus GN=Sars2 PE=3 SV=1	58.286	518	1660100	2012700	5909300	7888300	4039400	5787200	1060700	1617000	6991700	6480800	6727700	6031200	1103300	1065600	3808200	9921900	8550700	6306100
D3ZM20	D3ZM20		Kif13a	>tr|D3ZM20|D3ZM20_RAT Kinesin family member 13A (Predicted) OS=Rattus norvegicus GN=Kif13a PE=3 SV=1	188.82	1689	0	0	30438	0	0	17616	0	0	30062	0	0	0	0	0	33402	31939	18033	22790
D3ZM21;D4AAD3	D3ZM21		Comtd1	>tr|D3ZM21|D3ZM21_RAT Catechol-O-methyltransferase domain containing 1 (Predicted), isoform CRA_a OS=Rattus norvegicus GN=Comtd1 PE=4 SV=1	28.987	262	1833800	5790000	9229800	24682000	26323000	25851000	2873500	3882900	20467000	34614000	22894000	21898000	2273200	2078600	40218000	30347000	39361000	31679000
D3ZME7	D3ZME7		Hscb	>tr|D3ZME7|D3ZME7_RAT Protein Hscb OS=Rattus norvegicus GN=Hscb PE=3 SV=1	27.065	234	187100	543970	1548100	3540900	1454000	2314300	202500	481450	3404000	5126800	2257400	4781900	161310	379030	4104300	4645200	4729300	34880
D3ZML4	D3ZML4		Trabd	>tr|D3ZML4|D3ZML4_RAT Protein Trabd OS=Rattus norvegicus GN=Trabd PE=4 SV=1	42.114	376	2327500	917860	13954000	22325000	9198400	17085000	2368900	3066300	12779000	29924000	12558000	14705000	2334200	1080900	21997000	18376000	18579000	24497000
D3ZMP6	D3ZMP6		LOC100360065	>tr|D3ZMP6|D3ZMP6_RAT Protein LOC100360065 OS=Rattus norvegicus GN=LOC100360065 PE=1 SV=1	7.7059	64	248120	885720	0	4366600	0	608810	997890	1524500	2561000	1396900	1200200	272680	462000	17686	2307600	0	1613500	0
D3ZMR1	D3ZMR1		Tomm7	>tr|D3ZMR1|D3ZMR1_RAT Protein Tomm7 OS=Rattus norvegicus GN=Tomm7 PE=4 SV=1	6.1773	55	0	0	5072400	1263300	3579300	5269700	0	0	1858100	4377700	0	1959600	0	0	2638700	1729000	8615400	0
D3ZMR9	D3ZMR9		Mrpl21	>tr|D3ZMR9|D3ZMR9_RAT Mitochondrial ribosomal protein L21 (Predicted), isoform CRA_a OS=Rattus norvegicus GN=Mrpl21 PE=4 SV=1	23.39	209	1645800	2215900	15619000	19331000	15381000	13448000	1416100	1774300	13280000	27080000	8985100	13632000	1412400	1316500	7574900	19438000	11884000	605810
D3ZMS0	D3ZMS0		Grcc10	>tr|D3ZMS0|D3ZMS0_RAT Protein LOC100911713 OS=Rattus norvegicus GN=LOC100911713 PE=4 SV=1	13.194	126	741680	964760	4475800	6317000	1055300	1248700	564180	917390	2599200	6707200	2153700	2831700	872350	439220	5515700	3630200	4285800	4148700
D3ZMS1	D3ZMS1		Sf3b2	>tr|D3ZMS1|D3ZMS1_RAT Protein Sf3b2 OS=Rattus norvegicus GN=Sf3b2 PE=4 SV=2	98.17	878	196440	949770	4126400	855430	771550	852090	1282300	731220	878100	2071400	878200	1367800	300530	160600	2349600	1958100	569140	1428000
D3ZMU3;Q6TRW4-2;D3ZU56;F1M797;Q6TRW4-3;Q6TRW4;M0RA56;D3ZXE2	D3ZMU3;Q6TRW4-2;D3ZU56;F1M797;Q6TRW4-3;Q6TRW4;M0RA56;D3ZXE2	Sister chromatid cohesion protein PDS5 homolog B	Pds5b	>tr|D3ZMU3|D3ZMU3_RAT Sister chromatid cohesion protein PDS5 homolog B OS=Rattus norvegicus GN=Pds5b PE=4 SV=2;>sp|Q6TRW4-2|PDS5B_RAT Isoform 2 of Sister chromatid cohesion protein PDS5 homolog B OS=Rattus norvegicus GN=Pds5b;>tr|D3ZU56|D3ZU56_RAT Sister c	158.62	1393	18276	13366	508440	456950	135690	157130	25895	13994	157370	225300	64754	377800	21037	20173	131810	74519	159030	186030
D3ZMX7	D3ZMX7		RGD1565560	>tr|D3ZMX7|D3ZMX7_RAT Protein RGD1565560 OS=Rattus norvegicus GN=RGD1565560 PE=4 SV=1	18.413	158	163210	47068	539810	1650500	2473600	3706600	363100	122060	508710	1551200	1191300	0	142240	0	877460	493720	0	272870
D3ZMY7;F1M0C1	D3ZMY7		Nt5c2	>tr|D3ZMY7|D3ZMY7_RAT Protein Nt5c2 (Fragment) OS=Rattus norvegicus GN=Nt5c2 PE=4 SV=2	61.258	529	1604500	2217000	26926000	14145000	12026000	19475000	952840	1758900	7152700	11263000	9656300	11485000	1197800	3857000	24117000	16312000	34206000	18415000
D3ZMZ9	D3ZMZ9		Gnl3l	>tr|D3ZMZ9|D3ZMZ9_RAT Protein Gnl3l OS=Rattus norvegicus GN=Gnl3l PE=4 SV=2	65.147	576	0	0	0	0	0	69958	0	0	0	14956	0	10943	0	0	0	0	90555	0
D3ZN03	D3ZN03		LOC100362751	>tr|D3ZN03|D3ZN03_RAT Protein LOC100362751 OS=Rattus norvegicus GN=LOC100362751 PE=3 SV=1	11.762	115	3370300	6791300	57016000	56579000	4214700	0	4288000	5447200	36333000	61096000	0	0	4844500	2257900	69174000	43721000	0	0
D3ZN19	D3ZN19		Rnf121	>tr|D3ZN19|D3ZN19_RAT Protein Rnf121 OS=Rattus norvegicus GN=Rnf121 PE=4 SV=1	37.972	327	0	0	667800	1682400	82053	957690	0	0	951810	1131900	513930	792980	0	0	1767400	369670	690450	1363100
D3ZN21;F1LQD1;Q64060	D3ZN21		RGD1309586	>tr|D3ZN21|D3ZN21_RAT Protein RGD1309586 OS=Rattus norvegicus GN=Ddx3y PE=3 SV=1	72.994	659	4322300	7195000	33039000	46589000	23825000	50009000	6198100	5239600	26315000	39929000	20239000	18831000	3676200	4282400	41608000	31958000	36978000	12930000
D3ZN27;D3ZNI6	D3ZN27;D3ZNI6		Dnajc13	>tr|D3ZN27|D3ZN27_RAT Protein Dnajc13 OS=Rattus norvegicus GN=Dnajc13 PE=4 SV=2;>tr|D3ZNI6|D3ZNI6_RAT Protein Dnajc13 OS=Rattus norvegicus GN=Dnajc13 PE=4 SV=2	254.51	2243	211250	460810	3689000	4130900	1125700	2627300	226670	383720	4894000	4894000	2328800	3726900	287880	317410	3970300	2736400	3933400	2402800
D3ZN38	D3ZN38		Stard5	>tr|D3ZN38|D3ZN38_RAT Protein Stard5 OS=Rattus norvegicus GN=Stard5 PE=4 SV=1	23.955	213	424850	3823900	15418000	12407000	19732000	20507000	1404300	496860	9227500	23022000	18533000	24623000	2411900	1501700	30850000	16084000	38171000	99249
D3ZN39	D3ZN39	Ubiquitin carboxyl-terminal hydrolase	Usp8	>tr|D3ZN39|D3ZN39_RAT Ubiquitin carboxyl-terminal hydrolase OS=Rattus norvegicus GN=Usp8 PE=3 SV=2	122.55	1081	0	0	426860	116640	111750	119570	0	0	118500	356510	178850	272800	26456	0	764280	441240	118120	72538
D3ZN43	D3ZN43	NADH dehydrogenase (ubiquinone) complex I, assembly factor 6	Ndufaf6	>sp|D3ZN43|NDUF6_RAT NADH dehydrogenase (ubiquinone) complex I, assembly factor 6 OS=Rattus norvegicus GN=Ndufaf6 PE=3 SV=1	38.515	333	0	170360	3420800	1044600	210490	4570200	0	0	899370	5593200	277780	2693400	0	0	4109600	726000	7729500	6244900
D3ZN51	D3ZN51		Itga9	>tr|D3ZN51|D3ZN51_RAT Protein Itga9 OS=Rattus norvegicus GN=Itga9 PE=3 SV=2	114.53	1036	33351	0	699630	1315700	17571000	1957700	44722	37413	1694000	1194600	4593300	2082500	0	37247	935660	11229000	1468200	176600
D3ZN76	D3ZN76		Sec16a	>tr|D3ZN76|D3ZN76_RAT Protein Sec16a OS=Rattus norvegicus GN=Sec16a PE=4 SV=1	253.29	2346	82012	247530	1877200	1163500	2056500	1716300	105350	128220	1823200	2385600	1267900	1972500	133140	35125	3706100	2296400	2127900	1335900
D3ZN95	D3ZN95		Hcfc1	>tr|D3ZN95|D3ZN95_RAT Protein Hcfc1 OS=Rattus norvegicus GN=Hcfc1 PE=1 SV=1	209.15	2034	17640	28385	483290	335520	1094600	821250	34102	26749	405640	477900	580980	812290	25301	25803	650470	648640	930450	847460
D3ZNA3;M0R5W0	D3ZNA3		LOC685027	>tr|D3ZNA3|D3ZNA3_RAT Protein LOC100911987 OS=Rattus norvegicus GN=LOC100911987 PE=4 SV=1	30.001	266	0	0	2826700	1229700	0	2763000	0	0	0	1361900	1167300	389960	0	0	1596800	567060	565730	0
D3ZNF4	D3ZNF4		Tbl1xr1	>tr|D3ZNF4|D3ZNF4_RAT Protein Tbl1xr1 OS=Rattus norvegicus GN=Tbl1xr1 PE=4 SV=1	55.67	514	0	0	2275500	2999900	1912200	1598000	204710	183220	847810	1796100	939930	720620	190170	248040	90650	677320	1690600	731540
D3ZNJ5	D3ZNJ5		Inmt	>tr|D3ZNJ5|D3ZNJ5_RAT Protein Inmt OS=Rattus norvegicus GN=Inmt PE=4 SV=1	29.494	264	430510	0	26943000	9480500	2788700	18954000	2420400	6545000	53217000	107860000	35887000	94075000	2657200	3388500	39109000	75293000	54286000	1689300
D3ZNK1	D3ZNK1		LOC688905	>tr|D3ZNK1|D3ZNK1_RAT Protein Mtx3 OS=Rattus norvegicus GN=Mtx3 PE=4 SV=2	34.729	311	1825700	2549200	9303800	16122000	2814700	14510000	1312500	2311500	9375400	16693000	11873000	9260800	1104300	961230	12081000	10385000	16936000	19048000
D3ZNL0	D3ZNL0		Olr561	>tr|D3ZNL0|D3ZNL0_RAT Olfactory receptor OS=Rattus norvegicus GN=Olr561 PE=3 SV=1	36.289	323	0	0	2549400	1354100	0	1017200	0	0	2427100	0	0	0	0	0	1816900	1953000	0	484240
D3ZNN0;M0RAP5;B5DEJ9	D3ZNN0;M0RAP5		Sbf1	>tr|D3ZNN0|D3ZNN0_RAT Protein Sbf1 OS=Rattus norvegicus GN=Sbf1 PE=4 SV=2;>tr|M0RAP5|M0RAP5_RAT Protein Sbf1 OS=Rattus norvegicus GN=Sbf1 PE=4 SV=1	208.67	1867	0	0	156000	143640	63381	22928	0	0	138360	50156	36042	0	0	6202.7	103600	36012	75181	0
D3ZNQ6	D3ZNQ6		Ube2m	>tr|D3ZNQ6|D3ZNQ6_RAT Protein Ube2m OS=Rattus norvegicus GN=Ube2m PE=3 SV=1	20.9	183	5733100	12999000	32585000	34121000	26644000	25255000	2802100	7526800	28369000	42369000	27605000	37479000	4563100	5911700	45196000	36767000	43998000	9268600
D3ZNR6;D3ZJ91;F1M558	D3ZNR6;D3ZJ91;F1M558		Ddhd2	>tr|D3ZNR6|D3ZNR6_RAT Protein Ddhd2 OS=Rattus norvegicus GN=Ddhd2 PE=4 SV=2;>tr|D3ZJ91|D3ZJ91_RAT Protein Ddhd2 OS=Rattus norvegicus GN=Ddhd2 PE=4 SV=2;>tr|F1M558|F1M558_RAT Protein Ddhd2 (Fragment) OS=Rattus norvegicus GN=Ddhd2 PE=4 SV=2	64.511	566	1809100	0	947560	736040	776410	1801200	0	0	426980	779520	430210	8102300	0	0	798800	578370	12751000	9210300
D3ZNS8	D3ZNS8		Aaas	>tr|D3ZNS8|D3ZNS8_RAT Achalasia, adrenocortical insufficiency, alacrimia (Allgrove, triple-A) (Predicted), isoform CRA_a OS=Rattus norvegicus GN=Aaas PE=4 SV=2	59.36	546	77320	92613	3119300	3149500	321680	547560	43318	83446	4997500	1185200	447820	646780	63079	37209	2393000	212030	42845	437120
D3ZNV9;Q9ET61	D3ZNV9;Q9ET61	Complement component C1q receptor	Cd93	>tr|D3ZNV9|D3ZNV9_RAT Complement component C1q receptor OS=Rattus norvegicus GN=Cd93 PE=4 SV=2;>sp|Q9ET61|C1QR1_RAT Complement component C1q receptor OS=Rattus norvegicus GN=Cd93 PE=2 SV=1	68.363	639	0	0	198210	255120	0	124800	0	0	263060	233740	150720	126510	0	0	0	217980	264900	0
D3ZNX9;B2RZ29	D3ZNX9;B2RZ29		Mapk1ip1l	>tr|D3ZNX9|D3ZNX9_RAT Protein Mapk1ip1l OS=Rattus norvegicus GN=Mapk1ip1l PE=4 SV=1;>tr|B2RZ29|B2RZ29_RAT Mapk1ip1l protein OS=Rattus norvegicus GN=Mapk1ip1l PE=2 SV=1	23.617	239	854480	1137400	0	6209600	4422700	0	503060	994160	0	7381100	0	6512500	806990	484730	12888000	10314000	5455600	10863000
D3ZNY3	D3ZNY3		Mmaa	>tr|D3ZNY3|D3ZNY3_RAT Methylmalonic aciduria (Cobalamin deficiency) cblA type (Predicted), isoform CRA_a OS=Rattus norvegicus GN=Mmaa PE=4 SV=1	46.329	415	1281900	2680900	13160000	12885000	3877200	6107500	2135100	1249600	12059000	13351000	6192800	7325300	1585900	1187500	12397000	6695900	11066000	8196300
D3ZNZ5	D3ZNZ5		Ero1lb	>tr|D3ZNZ5|D3ZNZ5_RAT Protein Ero1lb OS=Rattus norvegicus GN=Ero1lb PE=4 SV=2	52.759	462	820470	715120	2900800	2864100	252050	4096200	412130	471030	1285200	2206900	1491900	1195400	334870	374910	3149300	2240900	1825300	1497500
D3ZP13	D3ZP13		Qsox2	>tr|D3ZP13|D3ZP13_RAT Sulfhydryl oxidase OS=Rattus norvegicus GN=Qsox2 PE=4 SV=1	79.197	708	2142.9	8456.2	186650	534460	758440	371800	23825	17413	369300	657010	1156900	209520	49318	41309	944050	362970	1182900	1505400
D3ZP47	D3ZP47		Phpt1	>tr|D3ZP47|D3ZP47_RAT Phosphohistidine phosphatase 1 (Predicted), isoform CRA_a OS=Rattus norvegicus GN=Phpt1 PE=4 SV=1	14.01	124	11591000	23507000	133460000	178070000	76671000	49315000	11978000	26642000	73173000	164710000	49732000	52770000	13567000	10193000	107740000	124940000	92711000	17445000
D3ZP96	D3ZP96		Mcm2	>tr|D3ZP96|D3ZP96_RAT Protein Mcm2 OS=Rattus norvegicus GN=Mcm2 PE=3 SV=2	102.14	905	141410	151290	1764300	2823100	449930	1151200	7896.5	31660	96679	205540	305130	112090	76001	92108	2132200	2216700	2159500	1020800
D3ZP98	D3ZP98		Hm13	>tr|D3ZP98|D3ZP98_RAT Histocompatibility 13 (Predicted), isoform CRA_a OS=Rattus norvegicus GN=Hm13 PE=4 SV=1	40.275	364	1669700	1238900	14254000	18532000	42007	12076000	748770	1038000	10710000	17230000	3812900	6760200	1226900	534120	16052000	5973000	11013000	3813800
D3ZPA1	D3ZPA1		Gcc1	>tr|D3ZPA1|D3ZPA1_RAT Protein Gcc1 OS=Rattus norvegicus GN=Gcc1 PE=4 SV=1	87.747	778	0	0	1142300	249190	1481000	414660	0	0	882760	680140	813250	279090	0	0	1057300	886170	860760	1299500
D3ZPB8	D3ZPB8		Tmem53	>tr|D3ZPB8|D3ZPB8_RAT Protein Tmem53 OS=Rattus norvegicus GN=Tmem53 PE=4 SV=1	31.554	276	599060	1215000	8459300	6315800	0	10683000	446200	353240	4194000	3862800	2073700	5962900	543040	228000	5813700	5002100	2795100	159360
D3ZPD8	D3ZPD8		B3galt1	>tr|D3ZPD8|D3ZPD8_RAT Protein B3galt1 OS=Rattus norvegicus GN=B3galt1 PE=4 SV=1	37.993	326	121300	125740	819870	1555200	631240	930700	171020	185150	494760	1210500	366880	735910	188470	127080	1127600	1503100	842210	1473400
D3ZPE5	D3ZPE5		Vps53	>tr|D3ZPE5|D3ZPE5_RAT Protein Vps53 OS=Rattus norvegicus GN=Vps53 PE=1 SV=1	94.428	832	135860	42029	543440	830600	285850	249650	108820	209490	711580	1098200	379620	548670	159920	123920	633970	935950	1277600	597030
D3ZPE6	D3ZPE6		Mrpl51	>tr|D3ZPE6|D3ZPE6_RAT Mitochondrial ribosomal protein L51 (Predicted) OS=Rattus norvegicus GN=Mrpl51 PE=4 SV=1	15.047	128	0	0	297620	0	3321300	3859200	0	0	0	490300	1146000	3785200	0	0	0	1206800	10018000	982980
D3ZPF2	D3ZPF2		Mcat	>tr|D3ZPF2|D3ZPF2_RAT Protein Mcat OS=Rattus norvegicus GN=Mcat PE=4 SV=1	41.832	380	1584300	1181000	11299000	25262000	8365500	14180000	1927000	2413200	13354000	19951000	12096000	12197000	1353100	1349900	14333000	13337000	11910000	17185000
D3ZPI8	D3ZPI8		C8g	>tr|D3ZPI8|D3ZPI8_RAT Complement component 8, gamma polypeptide (Predicted), isoform CRA_a OS=Rattus norvegicus GN=C8g PE=4 SV=1	18.414	164	972050	1633400	11942000	14454000	4578900	10561000	940200	711200	13739000	11784000	3411200	3381600	379930	521800	10679000	10872000	2853700	265600
D3ZPJ9	D3ZPJ9		Ascc2	>tr|D3ZPJ9|D3ZPJ9_RAT Protein Ascc2 OS=Rattus norvegicus GN=Ascc2 PE=4 SV=2	85.641	748	36593	51591	366010	357470	79968	289180	12564	11491	137840	0	68926	197240	40979	31073	254590	121990	284470	90394
D3ZPL1	D3ZPL1		Cpsf6	>tr|D3ZPL1|D3ZPL1_RAT Cleavage and polyadenylation specific factor 6, 68kDa (Predicted), isoform CRA_b OS=Rattus norvegicus GN=Cpsf6 PE=4 SV=2	59.179	551	416660	554660	3095000	1390200	2272200	3893100	664600	521760	7403700	8913300	928820	2166400	390600	94636	5175100	374070	340630	1230600
D3ZPL2	D3ZPL2			>tr|D3ZPL2|D3ZPL2_RAT Uncharacterized protein OS=Rattus norvegicus PE=4 SV=2	13.487	123	261540	94995	2616900	852740	1322800	10149000	554220	551810	13451000	3231000	4590700	2732500	455360	147670	7018100	3516500	8596400	0
D3ZPM3;D4A021	D3ZPM3;D4A021		Hbq1;Hbq1b	>tr|D3ZPM3|D3ZPM3_RAT Protein Hbq1 OS=Rattus norvegicus GN=Hbq1 PE=3 SV=1;>tr|D4A021|D4A021_RAT Protein Hbq1 OS=Rattus norvegicus GN=Hbq1 PE=3 SV=1	15.688	142	187310	129660	8274500	10297000	31577000	35147000	1493900	544040	38028000	17233000	5509300	9501000	766790	66879	4896600	5358800	8342400	38459
D3ZPP2	D3ZPP2		Arl8a	>tr|D3ZPP2|D3ZPP2_RAT Protein Arl8a OS=Rattus norvegicus GN=Arl8a PE=3 SV=1	21.39	186	1379900	2069700	4197400	20731000	16023000	10986000	1328000	1896800	11877000	23955000	7018000	10467000	1342900	684440	6717800	10175000	9540900	74968
D3ZPP9	D3ZPP9		RGD1306058	>tr|D3ZPP9|D3ZPP9_RAT Protein RGD1306058 OS=Rattus norvegicus GN=RGD1306058 PE=4 SV=1	23.328	203	0	0	814770	837050	1602200	1318200	0	0	693150	3778000	832830	2250900	0	0	0	1748800	652120	0
D3ZPR0	D3ZPR0		Cse1l	>tr|D3ZPR0|D3ZPR0_RAT Chromosome segregation 1-like (S. cerevisiae) (Predicted) OS=Rattus norvegicus GN=Cse1l PE=4 SV=1	110.21	971	3723600	7540500	32343000	24516000	9647700	26044000	3182200	3102100	22247000	24695000	15346000	20248000	3822400	3233800	25920000	24752000	40907000	14095000
D3ZPS3;M0R485;D4AB41	D3ZPS3;M0R485		LOC299567	>tr|D3ZPS3|D3ZPS3_RAT Protein Pglyrp2 OS=Rattus norvegicus GN=Pglyrp2 PE=4 SV=2;>tr|M0R485|M0R485_RAT Protein Pglyrp2 OS=Rattus norvegicus GN=Pglyrp2 PE=4 SV=1	39.773	371	543650	405560	3582000	5213400	3558200	3752100	744410	424240	6654100	3879600	2128400	2492500	448530	448580	3472900	4743700	3067700	2866100
D3ZPU3;Q6P7R8	D3ZPU3;Q6P7R8	Estradiol 17-beta-dehydrogenase 12	Hsd17b12	>tr|D3ZPU3|D3ZPU3_RAT Estradiol 17-beta-dehydrogenase 12 OS=Rattus norvegicus GN=Hsd17b12 PE=3 SV=1;>sp|Q6P7R8|DHB12_RAT Estradiol 17-beta-dehydrogenase 12 OS=Rattus norvegicus GN=Hsd17b12 PE=2 SV=1	32.125	290	9295700	17868000	93809000	118150000	22719000	121960000	6508500	10723000	58388000	122890000	69241000	89063000	9474600	6485100	92876000	81319000	101330000	124000000
D3ZPV7;D3ZEH2	D3ZPV7;D3ZEH2		Foxred1	>tr|D3ZPV7|D3ZPV7_RAT Uncharacterized protein OS=Rattus norvegicus GN=Foxred1 PE=4 SV=1;>tr|D3ZEH2|D3ZEH2_RAT RCG22732 OS=Rattus norvegicus GN=Foxred1 PE=4 SV=1	32.602	292	387860	164840	0	0	1034100	0	568790	463760	1054100	1705400	1869500	892910	337010	392790	0	646960	1909600	1685300
D3ZPV8	D3ZPV8		Ggct	>tr|D3ZPV8|D3ZPV8_RAT Protein Ggct OS=Rattus norvegicus GN=Ggct PE=4 SV=1	21.231	188	8120500	10455000	55121000	57700000	47052000	48072000	7679500	6740600	49996000	69605000	29184000	41073000	9348000	3901300	43135000	49300000	38138000	1554900
D3ZPW6	D3ZPW6		Lage3	>tr|D3ZPW6|D3ZPW6_RAT Protein Lage3 OS=Rattus norvegicus GN=Lage3 PE=4 SV=1	15.667	148	2860200	4262700	14952000	9954100	3760400	4209500	1194700	3697900	21667000	11852000	4066400	5444800	3170400	2980300	15320000	20316000	5563100	1743900
D3ZPY0	D3ZPY0		Wtap	>tr|D3ZPY0|D3ZPY0_RAT Protein Wtap OS=Rattus norvegicus GN=Wtap PE=4 SV=1	44.121	395	0	0	0	326180	207040	174920	0	0	0	476960	0	129580	0	0	0	243440	154550	214660
D3ZPY8	D3ZPY8		Akr1c13	>tr|D3ZPY8|D3ZPY8_RAT Protein Akr1c13 OS=Rattus norvegicus GN=Akr1c13 PE=4 SV=1	36.9	323	0	0	0	10824000	9400700	10077000	0	0	0	0	0	0	0	0	3060100	24789000	0	1408700
D3ZQ18	D3ZQ18		Nccrp1	>tr|D3ZQ18|D3ZQ18_RAT Protein Nccrp1 OS=Rattus norvegicus GN=Nccrp1 PE=4 SV=1	33.004	291	0	0	2581800	1659700	587630	4164700	825060	0	3942700	1518100	793540	1647400	0	0	663340	1721300	2028100	2868100
D3ZQ21	D3ZQ21		Saysd1	>tr|D3ZQ21|D3ZQ21_RAT Protein Saysd1 OS=Rattus norvegicus GN=Saysd1 PE=4 SV=2	20.507	187	639730	1427400	2550700	3160900	4445700	4845500	548080	757550	545100	18715000	4353700	5399200	587220	413560	7649100	2493100	4751600	2521000
D3ZQ25;CON__ENSEMBL:ENSBTAP00000016046	D3ZQ25		Fbln1	>tr|D3ZQ25|D3ZQ25_RAT Fibulin-1 OS=Rattus norvegicus GN=Fbln1 PE=3 SV=1	78.071	705	224270	0	1385900	982530	516940	2780300	271510	112380	982020	868370	928530	1230100	234370	314500	2914800	1582000	2822100	993020
D3ZQ45;D3ZM39;D4A4T7	D3ZQ45;D3ZM39;D4A4T7		Dsg1	>tr|D3ZQ45|D3ZQ45_RAT Protein Dsg1 OS=Rattus norvegicus GN=Dsg1 PE=4 SV=1;>tr|D3ZM39|D3ZM39_RAT Protein Dsg1 OS=Rattus norvegicus GN=Dsg1 PE=4 SV=1;>tr|D4A4T7|D4A4T7_RAT Protein Dsg1 OS=Rattus norvegicus GN=Dsg1 PE=4 SV=2	100.8	914	365260	299970	4742600	1615400	528330	2448800	1174300	202470	1203500	1242200	863990	989900	131050	186030	2412100	2191600	1158800	803670
D3ZQ57	D3ZQ57		Plxnb2	>tr|D3ZQ57|D3ZQ57_RAT Plexin B2 OS=Rattus norvegicus GN=Plxnb2 PE=4 SV=1	205.95	1841	529510	737030	6485800	9005800	4527300	6006000	836470	1131900	8744400	12179000	6152300	7246100	481120	331540	7262700	6762500	7424000	4225500
D3ZQB6	D3ZQB6		Cecr5	>tr|D3ZQB6|D3ZQB6_RAT Cat eye syndrome chromosome region, candidate 5 homolog (Human) (Predicted) OS=Rattus norvegicus GN=Cecr5 PE=4 SV=1	46.476	419	1526200	1817200	13015000	13768000	3374700	6895700	1603100	2145100	16807000	13791000	7647200	8415600	1096100	1363100	12425000	12941000	5545400	11170000
D3ZQC6	D3ZQC6		Ubr1	>tr|D3ZQC6|D3ZQC6_RAT Protein Ubr1 OS=Rattus norvegicus GN=Ubr1 PE=4 SV=2	154.55	1361	359120	726680	1219700	618240	106680	1044600	445780	340230	934340	1008200	421880	779500	771820	21185	5602200	684810	1202700	502240
D3ZQD3	D3ZQD3		Ogdhl	>tr|D3ZQD3|D3ZQD3_RAT 2-oxoglutarate dehydrogenase, mitochondrial OS=Rattus norvegicus GN=Ogdhl PE=4 SV=1	116.71	1029	0	0	0	47128000	0	0	0	0	0	0	0	0	0	0	0	0	0	0
D3ZQE8	D3ZQE8		Xpo5	>tr|D3ZQE8|D3ZQE8_RAT Protein Xpo5 OS=Rattus norvegicus GN=Xpo5 PE=4 SV=1	136.88	1204	38282	53021	366640	624040	81359	388250	31405	31973	505690	256040	31115	397610	72962	72014	1011300	583910	331510	296380
D3ZQI0	D3ZQI0		Polr2j	>tr|D3ZQI0|D3ZQI0_RAT Polymerase (RNA) II (DNA directed) polypeptide J (Predicted) OS=Rattus norvegicus GN=Polr2j PE=4 SV=1	13.293	117	183720	454940	1415400	228670	520590	1337000	293050	230040	66673	2080800	0	57055	371260	127790	398470	709430	135970	0
D3ZQI1	D3ZQI1	Glutathione peroxidase	Gpx7	>tr|D3ZQI1|D3ZQI1_RAT Glutathione peroxidase OS=Rattus norvegicus GN=Gpx7 PE=3 SV=1	21.089	186	1590500	1286700	8667800	15363000	10194000	10622000	959420	421140	2470700	9114300	5300600	6220900	750040	805630	8392900	6375400	8217000	140890
D3ZQI6	D3ZQI6		Xpo4	>tr|D3ZQI6|D3ZQI6_RAT Exportin 4 (Predicted) OS=Rattus norvegicus GN=Xpo4 PE=4 SV=2	129.66	1148	20276	78418	386320	60022	72159	494050	34998	46549	528970	0	207210	503370	55599	30109	842860	694130	890180	334250
D3ZQJ2	D3ZQJ2		Pop7	>tr|D3ZQJ2|D3ZQJ2_RAT Protein Pop7 OS=Rattus norvegicus GN=Pop7 PE=4 SV=1	15.745	140	337600	480150	2887200	4107100	1547400	2302700	0	303810	0	957460	2093700	3289100	395160	157490	0	722860	0	509660
D3ZQJ3	D3ZQJ3		Gigyf1	>tr|D3ZQJ3|D3ZQJ3_RAT PERQ amino acid rich, with GYF domain 1 (Predicted) OS=Rattus norvegicus GN=Gigyf1 PE=4 SV=1	116.01	1042	0	0	0	0	34404	191300	0	0	0	64609	0	443600	0	0	0	35491	46550	10278
D3ZQK8	D3ZQK8		Ly75	>tr|D3ZQK8|D3ZQK8_RAT Protein Ly75 OS=Rattus norvegicus GN=Ly75 PE=4 SV=2	197.11	1722	51628	0	428990	0	87136	0	0	76710	430950	190740	0	0	64310	73198	0	474160	0	410290
D3ZQL1	D3ZQL1		RGD1305045	>tr|D3ZQL1|D3ZQL1_RAT Protein RGD1305045 OS=Rattus norvegicus GN=RGD1305045 PE=4 SV=2	19.083	169	1722400	6297400	15953000	15452000	6046900	6520900	2252700	3328400	11843000	28228000	8851900	9230100	3080600	572330	8870000	20682000	14507000	305210
D3ZQL7	D3ZQL7		Tppp	>tr|D3ZQL7|D3ZQL7_RAT Protein Tppp OS=Rattus norvegicus GN=Tppp PE=4 SV=1	23.546	218	282990	873630	3477000	3712700	1438800	290940	266690	529690	1690000	3064600	2426700	1822500	286980	51368	3615500	0	1892100	96882
D3ZQM0	D3ZQM0		Sf3a1	>tr|D3ZQM0|D3ZQM0_RAT Protein Sf3a1 OS=Rattus norvegicus GN=Sf3a1 PE=4 SV=1	88.587	791	537030	1417000	4333800	2540600	3905200	2467300	859320	802520	1304700	6941700	2339600	5340700	771120	144910	4119400	2670700	4744000	2387700
D3ZQN7	D3ZQN7		Lamb1	>tr|D3ZQN7|D3ZQN7_RAT Protein Lamb1 OS=Rattus norvegicus GN=Lamb1 PE=4 SV=2	202.79	1834	0	0	0	0	0	27004	0	0	0	0	0	0	0	0	0	0	0	0
D3ZQU7	D3ZQU7		Gp1ba	>tr|D3ZQU7|D3ZQU7_RAT Protein Gp1ba OS=Rattus norvegicus GN=Gp1ba PE=4 SV=1	78.271	717	37525	21911	276040	1136200	892180	1788700	47192	46610	1638600	1869600	544140	936310	33660	14780	289470	876370	1864500	583670
D3ZQX3	D3ZQX3		Mrps12	>tr|D3ZQX3|D3ZQX3_RAT Mitochondrial ribosomal protein S12 (Predicted) OS=Rattus norvegicus GN=Mrps12 PE=3 SV=1	15.441	139	846910	1888300	10342000	12013000	3688900	1071800	1408600	2079000	5416900	11346000	4670300	3833400	999600	786490	12135000	8880300	3642000	0
D3ZR35	D3ZR35	Small integral membrane protein 13	Smim13	>sp|D3ZR35|SIM13_RAT Small integral membrane protein 13 OS=Rattus norvegicus GN=Smim13 PE=3 SV=1	9.9953	88	0	0	0	10071000	0	25631000	0	0	3297400	20276000	25954000	20487000	0	0	4951400	5323500	33561000	0
D3ZR49	D3ZR49		Man1a2	>tr|D3ZR49|D3ZR49_RAT Protein Man1a2 OS=Rattus norvegicus GN=Man1a2 PE=4 SV=2	72.588	641	89877	292290	1027800	7888600	3005200	3099900	193960	224900	635870	2810200	1948900	2222600	204950	70246	3959700	2200600	2722800	3037600
D3ZR58	D3ZR58		Iqcf6	>tr|D3ZR58|D3ZR58_RAT Protein Iqcf6 OS=Rattus norvegicus GN=Iqcf6 PE=4 SV=1	18.55	157	0	0	0	0	0	0	0	0	0	0	0	0	0	0	1677000	0	0	0
D3ZRC4	D3ZRC4		Pnpla8	>tr|D3ZRC4|D3ZRC4_RAT Protein Pnpla8 OS=Rattus norvegicus GN=Pnpla8 PE=4 SV=1	87.96	776	79962	245800	1339500	691670	319700	1595100	72378	412100	2108400	2809600	3228100	3525000	203110	130250	2029300	2398100	3728700	813970
D3ZRD3	D3ZRD3		Pde6d	>tr|D3ZRD3|D3ZRD3_RAT Phosphodiesterase 6D, cGMP-specific, rod, delta (Predicted), isoform CRA_b OS=Rattus norvegicus GN=Pde6d PE=4 SV=2	15.043	131	0	757830	809170	7004900	1771800	3786400	0	558740	2962900	3373900	4912900	5234400	523720	425470	0	1629300	6485700	0
D3ZRE6	D3ZRE6		Adck2	>tr|D3ZRE6|D3ZRE6_RAT AarF domain containing kinase 2 (Predicted) OS=Rattus norvegicus GN=Adck2 PE=4 SV=1	68.403	616	13184	24232	0	73174	51999	78119	0	0	85215	0	0	103550	4930.6	0	0	0	0	88565
D3ZRE7	D3ZRE7		Swap70	>tr|D3ZRE7|D3ZRE7_RAT Protein Swap70 OS=Rattus norvegicus GN=Swap70 PE=4 SV=1	68.773	585	1160600	1267400	7725700	9865200	3898200	5655100	1091000	1342800	7300900	10369000	3755300	4355800	1268100	1079500	7739800	9302500	5025600	3296400
D3ZRH1	D3ZRH1		Oxa1l	>tr|D3ZRH1|D3ZRH1_RAT Protein Oxa1l OS=Rattus norvegicus GN=Oxa1l PE=3 SV=1	48.023	433	705890	576790	5047400	9598900	7814100	4656600	480260	1128600	1427600	12145000	3521300	9844900	792380	828700	15355000	9809300	6096400	16924000
D3ZRI9	D3ZRI9		Gan	>tr|D3ZRI9|D3ZRI9_RAT Giant axonal neuropathy (Predicted) OS=Rattus norvegicus GN=Gan PE=4 SV=1	68.392	603	0	0	0	611490	291920	385120	0	0	0	334850	0	345580	0	0	589850	751760	278530	240130
D3ZRL3	D3ZRL3		Dusp23	>tr|D3ZRL3|D3ZRL3_RAT Protein Dusp23 OS=Rattus norvegicus GN=Dusp23 PE=4 SV=1	16.56	150	769250	1349900	15806000	15091000	13022000	11145000	1318000	1458200	7864800	18627000	7710700	11573000	996460	1043600	7830900	9282600	15278000	321410
D3ZRN3	D3ZRN3		Actbl2	>tr|D3ZRN3|D3ZRN3_RAT Protein Actbl2 OS=Rattus norvegicus GN=Actbl2 PE=3 SV=1	41.963	376	0	0	10179000	6166500	707660	2264100	0	0	3350400	4181300	1612200	770900	0	0	3786200	3547800	2317100	716680
D3ZRN5	D3ZRN5		Trove2	>tr|D3ZRN5|D3ZRN5_RAT Protein Trove2 OS=Rattus norvegicus GN=Trove2 PE=4 SV=1	60.042	538	0	0	227000	433130	408150	0	0	0	425420	395300	278970	362800	0	0	618750	371270	387590	0
D3ZRQ5;D3ZVP7	D3ZRQ5;D3ZVP7	Zinc finger FYVE domain-containing protein 21	Zfyve21	>tr|D3ZRQ5|D3ZRQ5_RAT Zinc finger FYVE domain-containing protein 21 OS=Rattus norvegicus GN=Zfyve21 PE=4 SV=1;>sp|D3ZVP7|ZFY21_RAT Zinc finger FYVE domain-containing protein 21 OS=Rattus norvegicus GN=Zfyve21 PE=3 SV=1	25.795	233	0	0	0	0	1054100	1098100	0	0	949420	1731500	981890	1378700	0	0	0	999580	943670	144330
D3ZRU3	D3ZRU3		RGD1308299	>tr|D3ZRU3|D3ZRU3_RAT Protein RGD1308299 OS=Rattus norvegicus GN=Oard1 PE=4 SV=1	17.392	158	0	0	513840	0	125880	0	0	0	106720	0	345290	577390	0	0	0	0	379010	396560
D3ZRV0	D3ZRV0		Dcun1d1	>tr|D3ZRV0|D3ZRV0_RAT DCN1-like protein OS=Rattus norvegicus GN=Dcun1d1 PE=4 SV=1	24.059	207	1328400	3235000	19195000	20163000	2165900	12025000	1390400	2610100	9152300	13565000	14257000	22406000	1925500	1892400	24903000	8419000	22314000	23091000
D3ZRW8	D3ZRW8	Ethanolamine kinase 2	Etnk2	>sp|D3ZRW8|EKI2_RAT Ethanolamine kinase 2 OS=Rattus norvegicus GN=Etnk2 PE=3 SV=1	44.734	385	514780	374610	7618900	9331900	3108500	4338200	526540	813290	5622000	10167000	5096200	4391200	411780	389120	7455000	3824900	3239500	6235200
D3ZRX0	D3ZRX0		LOC100910823	>tr|D3ZRX0|D3ZRX0_RAT Protein LOC100910823 OS=Rattus norvegicus GN=LOC100910823 PE=4 SV=1	27.854	239	120910	126840	0	1865800	190370	1493100	111970	66645	1186300	2325300	391290	1293400	116200	0	1536700	788170	178440	75753
D3ZRX9	D3ZRX9		Cnn2	>tr|D3ZRX9|D3ZRX9_RAT Protein Cnn2 OS=Rattus norvegicus GN=Cnn2 PE=4 SV=2	24.126	220	0	0	2831300	3206400	1600000	0	0	0	0	6018500	0	0	0	0	5002400	792970	440710	1202200
D3ZS22;Q5BJP2	D3ZS22;Q5BJP2	Spliceosome-associated protein CWC15 homolog	LOC310177;Cwc15	>tr|D3ZS22|D3ZS22_RAT Protein LOC310177 OS=Rattus norvegicus GN=LOC310177 PE=4 SV=1;>sp|Q5BJP2|CWC15_RAT Spliceosome-associated protein CWC15 homolog OS=Rattus norvegicus GN=Cwc15 PE=2 SV=1	26.142	224	401610	273660	3865700	0	1008200	0	257100	397850	0	0	0	302280	446800	147430	6038200	2824400	0	0
D3ZS52	D3ZS52		LOC100363048	>tr|D3ZS52|D3ZS52_RAT Protein LOC100363048 OS=Rattus norvegicus GN=LOC100363048 PE=4 SV=1	9.0647	79	0	660140	42212000	122450000	24522000	52712000	18913	0	52217000	46865000	23983000	14387000	45982	0	32025000	35496000	23712000	12197000
D3ZS58	D3ZS58	NADH dehydrogenase [ubiquinone] 1 alpha subcomplex subunit 2	Ndufa2	>tr|D3ZS58|D3ZS58_RAT NADH dehydrogenase [ubiquinone] 1 alpha subcomplex subunit 2 OS=Rattus norvegicus GN=Ndufa2 PE=4 SV=1	10.844	97	12880000	26655000	90141000	233100000	399940000	57192000	23965000	25329000	105470000	268830000	107980000	165640000	17462000	4483300	128720000	119450000	171870000	46338000
D3ZS74	D3ZS74	Metalloendopeptidase OMA1, mitochondrial	Oma1	>sp|D3ZS74|OMA1_RAT Metalloendopeptidase OMA1, mitochondrial OS=Rattus norvegicus GN=Oma1 PE=3 SV=1	57.144	504	81644	83609	756550	1095200	318440	790550	110190	88741	1062700	1276100	1158900	1455500	152750	219930	2334500	542110	1854800	1551100
D3ZS75	D3ZS75		Ndufc1	>tr|D3ZS75|D3ZS75_RAT Protein Ndufc1 OS=Rattus norvegicus GN=Ndufc1 PE=4 SV=1	8.7862	76	2006900	6627200	65148000	2854300	651950	21601000	5416700	7292600	64923000	31160000	13554000	139040	4279000	3313800	58881000	672650	30813000	0
D3ZSA9	D3ZSA9		Nomo1	>tr|D3ZSA9|D3ZSA9_RAT Protein Nomo1 OS=Rattus norvegicus GN=Nomo1 PE=4 SV=1	133.44	1214	2260000	3703400	17292000	27823000	10542000	18014000	3203900	2165600	20533000	30657000	16013000	19423000	2721000	1232700	24519000	21535000	31345000	11391000
D3ZSC2	D3ZSC2		Pdcd2l	>tr|D3ZSC2|D3ZSC2_RAT Protein Pdcd2l OS=Rattus norvegicus GN=Pdcd2l PE=4 SV=1	39.732	360	0	0	0	632590	799780	634640	0	0	0	621370	285860	483680	0	0	0	94138	0	421030
D3ZSD8	D3ZSD8		Tmem143	>tr|D3ZSD8|D3ZSD8_RAT Protein Tmem143 OS=Rattus norvegicus GN=Tmem143 PE=4 SV=1	51.569	458	83813	323570	869620	0	932760	889760	76120	236030	0	1508300	1331200	603900	90038	15689	968790	0	744700	977840
D3ZSF3	D3ZSF3			>tr|D3ZSF3|D3ZSF3_RAT Uncharacterized protein OS=Rattus norvegicus PE=3 SV=1	16.475	152	595590	934490	7527200	29215000	27673000	49318000	0	666830	2572900	99892000	22986000	32687000	515660	2348800	16415000	5492100	32976000	468600
D3ZSF9;B2RZD5	D3ZSF9;B2RZD5		Rpl22l2;Rpl22l1	>tr|D3ZSF9|D3ZSF9_RAT Protein Rpl22l2 OS=Rattus norvegicus GN=Rpl22l2 PE=4 SV=1;>tr|B2RZD5|B2RZD5_RAT Protein LOC688712 OS=Rattus norvegicus GN=LOC688712 PE=2 SV=1	14.441	122	30945000	59075000	153820000	498580000	468100000	234480000	12534000	25473000	156290000	298380000	132430000	102420000	40899000	50190000	309080000	163200000	198880000	48722000
D3ZSL2	D3ZSL2		Abracl	>tr|D3ZSL2|D3ZSL2_RAT Protein Abracl OS=Rattus norvegicus GN=Abracl PE=4 SV=1	9.0303	81	1860700	4393000	12650000	19548000	9980400	25079000	2048700	2368200	15474000	6081000	9922900	2373700	1697800	2509800	2766500	8001100	20227000	0
D3ZSL5	D3ZSL5		Ptpn14	>tr|D3ZSL5|D3ZSL5_RAT Protein Ptpn14 OS=Rattus norvegicus GN=Ptpn14 PE=4 SV=1	95.214	850	0	0	0	0	0	0	0	0	0	305630	0	0	0	0	0	0	0	0
D3ZSM0	D3ZSM0			>tr|D3ZSM0|D3ZSM0_RAT Uncharacterized protein OS=Rattus norvegicus PE=4 SV=2	62.513	543	121990	199860	847710	848140	0	0	0	82426	632940	937230	0	0	112740	171410	936540	742090	0	0
D3ZSN4	D3ZSN4		Zfp330	>tr|D3ZSN4|D3ZSN4_RAT Protein Zfp330 OS=Rattus norvegicus GN=Zfp330 PE=4 SV=1	35.725	317	0	0	516800	0	542020	0	0	0	0	361370	153540	231070	0	0	331740	256140	0	0
D3ZSN7	D3ZSN7		Slc25a44	>tr|D3ZSN7|D3ZSN7_RAT Protein Slc25a44 OS=Rattus norvegicus GN=Slc25a44 PE=3 SV=1	37.879	337	176680	310710	4107300	6926300	228600	4124000	674040	463570	1504300	3796900	2178900	4300200	535240	359000	6667100	3554700	3299500	2313500
D3ZSN8;B5DFA1	D3ZSN8;B5DFA1	TBC1 domain family member 2A	Tbc1d2	>tr|D3ZSN8|D3ZSN8_RAT TBC1 domain family member 2A OS=Rattus norvegicus GN=Tbc1d2 PE=4 SV=1;>sp|B5DFA1|TBD2A_RAT TBC1 domain family member 2A OS=Rattus norvegicus GN=Tbc1d2 PE=2 SV=1	89.301	781	0	0	1341800	986500	504160	298070	0	0	1217600	999320	269860	312130	0	0	1268200	1002100	529220	54765
D3ZSP1;D4A8M5;F7ETL6	D3ZSP1;D4A8M5		Snrpe;LOC100362099	>tr|D3ZSP1|D3ZSP1_RAT Protein LOC100361838 OS=Rattus norvegicus GN=LOC100361838 PE=4 SV=1;>tr|D4A8M5|D4A8M5_RAT Protein Snrpep2 OS=Rattus norvegicus GN=Snrpep2 PE=4 SV=1	10.76	92	1332800	8942700	19233000	11730000	29370000	26872000	763320	397060	12164000	84246000	2375200	12097000	2182700	0	43887000	22847000	5492900	4238200
D3ZSU7;M0RCG2	D3ZSU7;M0RCG2		Mien1	>tr|D3ZSU7|D3ZSU7_RAT Protein Mien1 OS=Rattus norvegicus GN=Mien1 PE=4 SV=2;>tr|M0RCG2|M0RCG2_RAT Uncharacterized protein OS=Rattus norvegicus GN=LOC102552549 PE=4 SV=1	12.326	115	0	963580	11914000	5841600	2288800	5332100	618860	648490	1799300	6630900	715280	0	474000	0	4517900	1872200	627660	0
D3ZT01	D3ZT01		Cog2	>tr|D3ZT01|D3ZT01_RAT Protein Cog2 OS=Rattus norvegicus GN=Cog2 PE=4 SV=1	81.804	730	57571	248840	1173200	1487800	708800	410570	0	114740	784370	1382900	465690	502450	62914	87828	1683500	2545500	1266800	1239500
D3ZT51	D3ZT51		Exosc3	>tr|D3ZT51|D3ZT51_RAT Protein Exosc3 OS=Rattus norvegicus GN=Exosc3 PE=4 SV=2	22.722	219	0	0	757940	907810	0	988870	0	0	822830	894600	543970	0	0	0	943640	649850	1173400	1179900
D3ZT64	D3ZT64		Atg2a	>tr|D3ZT64|D3ZT64_RAT Protein Atg2a OS=Rattus norvegicus GN=Atg2a PE=4 SV=1	211.36	1916	0	0	13608	0	8390.9	92097	0	0	16872	0	0	0	0	123810	43826	40195	48554	48646
D3ZT71	D3ZT71		Bcl2l13	>tr|D3ZT71|D3ZT71_RAT BCL2-like 13 (Apoptosis facilitator) (Predicted) OS=Rattus norvegicus GN=Bcl2l13 PE=4 SV=2	21.691	199	1522400	4287100	26112000	19581000	11379000	14710000	3424700	4132400	12275000	32417000	10792000	26900000	2060800	1307400	16925000	17660000	16202000	12511000
D3ZT90	D3ZT90		Gcdh	>tr|D3ZT90|D3ZT90_RAT Glutaryl-Coenzyme A dehydrogenase (Predicted) OS=Rattus norvegicus GN=Gcdh PE=3 SV=1	49.713	447	67122000	102940000	336520000	348380000	327430000	352920000	122120000	130970000	490980000	999500000	594820000	418030000	55576000	76454000	230420000	462260000	596550000	612260000
D3ZT98	D3ZT98		Bola3	>tr|D3ZT98|D3ZT98_RAT Protein Bola3 OS=Rattus norvegicus GN=Bola3 PE=3 SV=1	12.297	110	0	0	3502000	16794000	6041800	11905000	0	0	11115000	15464000	8898000	4720800	0	0	16331000	4100300	6708800	28906
D3ZTB4	D3ZTB4		Vps11	>tr|D3ZTB4|D3ZTB4_RAT Protein Vps11 OS=Rattus norvegicus GN=Vps11 PE=4 SV=1	101.17	878	0	0	211040	163100	318250	1602200	0	0	194320	245920	418020	1549900	0	0	129750	2854400	544470	608760
D3ZTB5	D3ZTB5		S100a13	>tr|D3ZTB5|D3ZTB5_RAT Protein S100a13 OS=Rattus norvegicus GN=S100a13 PE=4 SV=2	11.198	98	0	0	2024000	3245700	254900	4013100	0	0	1357500	5032600	2341100	0	0	0	2774700	659320	3570000	0
D3ZTC6	D3ZTC6	tRNA pseudouridine synthase	Pusl1	>tr|D3ZTC6|D3ZTC6_RAT tRNA pseudouridine synthase OS=Rattus norvegicus GN=Pusl1 PE=3 SV=1	14.163	127	0	0	0	1566800	0	1041900	0	0	1423400	1854700	0	0	0	0	0	0	416830	0
D3ZTE0	D3ZTE0	Coagulation factor XII;Coagulation factor XIIa heavy chain;Coagulation factor XIIa light chain	F12	>sp|D3ZTE0|FA12_RAT Coagulation factor XII OS=Rattus norvegicus GN=F12 PE=2 SV=1	65.843	595	334310	565560	3947000	4235200	3255600	6451000	545070	468800	8406200	3157900	3819400	4592700	279940	349830	2249300	4055600	4724300	2871800
D3ZTF1	D3ZTF1		Slc4a1ap	>tr|D3ZTF1|D3ZTF1_RAT Protein Slc4a1ap OS=Rattus norvegicus GN=Slc4a1ap PE=4 SV=2	78.936	712	0	0	203340	0	151560	0	0	0	0	0	184430	193280	0	0	0	0	237840	159220
D3ZTG2	D3ZTG2		Ttc27	>tr|D3ZTG2|D3ZTG2_RAT Protein Ttc27 OS=Rattus norvegicus GN=Ttc27 PE=4 SV=1	96.547	847	0	0	123900	175130	400520	263490	0	0	79414	112250	259840	150560	0	0	296730	148890	415200	231160
D3ZTJ0	D3ZTJ0		Rp2	>tr|D3ZTJ0|D3ZTJ0_RAT 60S acidic ribosomal protein P2 OS=Rattus norvegicus GN=Rp2 PE=4 SV=2	39.263	348	0	192550	835540	1485800	174870	1474300	0	94259	1304000	1085400	1002400	1104700	75210	94084	1605200	873210	1794300	1780200
D3ZTL0;D4A408	D3ZTL0		Tcerg1	>tr|D3ZTL0|D3ZTL0_RAT Protein Tcerg1 OS=Rattus norvegicus GN=Tcerg1 PE=4 SV=1	121.85	1081	71940	156830	2007800	2016100	1670300	1155300	216710	204090	1544100	3640700	1365600	2239200	65545	27351	2251000	2692900	1021400	1930100
D3ZTL3;D4A779	D3ZTL3;D4A779		Phldb2	>tr|D3ZTL3|D3ZTL3_RAT Protein Phldb2 OS=Rattus norvegicus GN=Phldb2 PE=4 SV=2;>tr|D4A779|D4A779_RAT Protein Phldb2 OS=Rattus norvegicus GN=Phldb2 PE=4 SV=2	134.24	1180	0	0	121020	144540	0	0	156840	0	240310	1698500	0	0	0	0	0	217340	0	16275
D3ZTN0;D4A0G5	D3ZTN0		Prkdc	>tr|D3ZTN0|D3ZTN0_RAT Protein Prkdc (Fragment) OS=Rattus norvegicus GN=Prkdc PE=4 SV=2	415.26	3624	0	0	0	173440	12655	12494	0	0	171280	141380	1896.3	847.98	0	0	54729	65716	0	0
D3ZTN2	D3ZTN2		Cmc1	>tr|D3ZTN2|D3ZTN2_RAT Protein Cmc1 OS=Rattus norvegicus GN=Cmc1 PE=4 SV=2	12.572	106	4916000	8799300	4370100	79983000	30486000	28786000	5921800	8821200	29281000	66502000	32105000	39533000	6759400	3276900	42022000	36843000	39979000	33290000
D3ZTP0;M0RA88	D3ZTP0;M0RA88		Aldh1l2	>tr|D3ZTP0|D3ZTP0_RAT Protein Aldh1l2 OS=Rattus norvegicus GN=Aldh1l2 PE=3 SV=2;>tr|M0RA88|M0RA88_RAT Protein Aldh1l2 (Fragment) OS=Rattus norvegicus GN=Aldh1l2 PE=3 SV=1	102.98	930	12022000	31748000	118250000	198140000	86890000	128710000	11789000	7093300	87496000	122390000	84502000	59061000	9871500	2903000	108010000	48153000	146800000	66656000
D3ZTP8	D3ZTP8		Pigo	>tr|D3ZTP8|D3ZTP8_RAT Protein Pigo OS=Rattus norvegicus GN=Pigo PE=4 SV=1	119.68	1100	0	0	236300	233090	0	106720	0	0	145330	358220	104330	108970	230260	70363	239400	372460	147120	84383
D3ZTR1	D3ZTR1		Mrps17	>tr|D3ZTR1|D3ZTR1_RAT Protein Mrps17 OS=Rattus norvegicus GN=Mrps17 PE=4 SV=1	13.999	127	1314800	3843500	8379400	15117000	9983900	13658000	909470	2547500	4221400	16923000	8539400	16533000	2098900	1416100	12341000	9697300	17393000	0
D3ZTR4	D3ZTR4		Sumf2	>tr|D3ZTR4|D3ZTR4_RAT Protein Sumf2 OS=Rattus norvegicus GN=Sumf2 PE=4 SV=2	34.651	307	895100	778190	13240000	16136000	5981400	6282700	757140	818070	9789300	11073000	7926900	11436000	690210	868940	15681000	13595000	11015000	7443100
D3ZTR5;M0R785	D3ZTR5;M0R785		Zbed5;Chchd2	>tr|D3ZTR5|D3ZTR5_RAT Protein Zbed5 OS=Rattus norvegicus GN=Zbed5 PE=4 SV=1;>tr|M0R785|M0R785_RAT Protein LOC100910788 OS=Rattus norvegicus GN=Chchd2 PE=4 SV=1	84.034	757	1522700	3298400	9498800	14634000	10345000	14603000	1486700	2331700	11864000	32047000	13168000	18696000	1625200	1931800	12747000	24409000	10387000	1697700
D3ZTT5	D3ZTT5		LOC365692	>tr|D3ZTT5|D3ZTT5_RAT Uncharacterized protein OS=Rattus norvegicus GN=LOC365692 PE=4 SV=2	18.175	158	0	0	0	0	0	0	0	0	0	0	0	0	0	0	0	0	0	0
D3ZTV7	D3ZTV7		Ash2l	>tr|D3ZTV7|D3ZTV7_RAT Ash2 (Absent, small, or homeotic)-like (Drosophila) (Predicted) OS=Rattus norvegicus GN=Ash2l PE=4 SV=1	68.227	623	0	0	171560	0	0	110000	0	0	0	299880	0	0	0	0	366010	0	0	183010
D3ZTW7	D3ZTW7		Atpaf2	>tr|D3ZTW7|D3ZTW7_RAT ATP synthase mitochondrial F1 complex assembly factor 2 (Predicted), isoform CRA_c OS=Rattus norvegicus GN=Atpaf2 PE=4 SV=1	34.192	298	1443000	4021000	14434000	14220000	468710	12698000	2720900	3791900	17889000	21564000	14945000	17115000	1982900	1790100	12365000	22062000	13955000	1973900
D3ZTW8	D3ZTW8		Mrpl27	>tr|D3ZTW8|D3ZTW8_RAT Mitochondrial ribosomal protein L27 (Predicted), isoform CRA_a OS=Rattus norvegicus GN=Mrpl27 PE=4 SV=2	15.823	148	568510	1030700	7068600	12036000	3609400	13335000	764040	947830	4234400	20945000	4008300	6907200	254210	450990	12490000	15128000	12567000	1540900
D3ZTW9	D3ZTW9		Exog	>tr|D3ZTW9|D3ZTW9_RAT Endonuclease G-like 1 (Predicted), isoform CRA_d OS=Rattus norvegicus GN=Exog PE=4 SV=1	41.326	368	0	0	2261700	1270200	796390	2762300	0	0	624900	1306800	589180	1533300	0	0	916260	895500	977810	2387800
D3ZTX0	D3ZTX0	Transmembrane emp24 domain-containing protein 7	Tmed7	>sp|D3ZTX0|TMED7_RAT Transmembrane emp24 domain-containing protein 7 OS=Rattus norvegicus GN=Tmed7 PE=1 SV=1	25.479	226	11768000	27027000	128860000	127170000	28132000	104900000	12098000	20283000	52080000	138620000	48497000	89503000	14264000	7451500	105130000	94121000	117750000	75799000
D3ZTX4	D3ZTX4		Mgam	>tr|D3ZTX4|D3ZTX4_RAT Protein Mgam OS=Rattus norvegicus GN=Mgam PE=3 SV=2	211.09	1849	9572.3	12390	1154000	181050	62236	143460	13709	10861	405300	310690	219970	206270	9963	12449	87060	99938	161440	53299
D3ZTY0	D3ZTY0		Cnih4	>tr|D3ZTY0|D3ZTY0_RAT Protein Cnih4 OS=Rattus norvegicus GN=Cnih4 PE=4 SV=1	16.091	139	0	0	13868000	8370200	0	5074800	0	0	7530800	18304000	3317300	2902300	0	0	7483200	9372600	4527300	0
D3ZU12	D3ZU12		Gm11639	>tr|D3ZU12|D3ZU12_RAT Protein Gm11639 OS=Rattus norvegicus GN=Gm11639 PE=4 SV=2	84.407	747	0	0	0	0	81493	768120	0	0	2216600	162470	396690	0	0	0	767820	1289600	126180	0
D3ZU51	D3ZU51		Rpp30	>tr|D3ZU51|D3ZU51_RAT Protein Rpp30 OS=Rattus norvegicus GN=Rpp30 PE=4 SV=1	29.485	268	0	210970	1460600	2046200	268120	1156800	52198	168270	2153200	3522600	477460	1746800	109890	77053	3317200	716660	1781900	1350400
D3ZU54	D3ZU54		Denr	>tr|D3ZU54|D3ZU54_RAT Protein Denr OS=Rattus norvegicus GN=Denr PE=4 SV=2	21.82	194	1919900	2594300	18490000	17320000	11488000	14045000	1714400	1514800	10552000	22978000	9275700	9308900	1496000	939890	19804000	13506000	15086000	18978000
D3ZU83	D3ZU83		Ergic3	>tr|D3ZU83|D3ZU83_RAT ERGIC and golgi 3 (Predicted) OS=Rattus norvegicus GN=Ergic3 PE=4 SV=1	43.223	383	337380	1437100	4902500	8477900	545770	7808300	0	0	1439500	4346100	5818900	4387400	219620	0	5827400	3775400	4674600	4392200
D3ZUB0;M0R770;M0R4Q9	D3ZUB0		Rcn1	>tr|D3ZUB0|D3ZUB0_RAT Protein Rcn1 OS=Rattus norvegicus GN=Rcn1 PE=4 SV=1	38.09	325	0	1020300	5383000	2565700	0	3999800	2760500	530050	635160	447860	932250	1080700	905330	512920	3675900	323480	2651700	753000
D3ZUC2	D3ZUC2		Mov10	>tr|D3ZUC2|D3ZUC2_RAT Protein Mov10 OS=Rattus norvegicus GN=Mov10 PE=4 SV=1	113.76	1004	356120	338050	776920	2695600	661310	1708700	912980	277870	1118900	2363200	2069500	3780000	252640	157310	2440400	2594900	2568300	1529000
D3ZUC9;O88506	D3ZUC9		Oxsr1	>tr|D3ZUC9|D3ZUC9_RAT Oxidative-stress responsive 1 (Predicted) OS=Rattus norvegicus GN=Oxsr1 PE=4 SV=1	58.204	527	0	0	3107100	1354700	448050	1895600	0	0	1713400	904580	970490	2099000	0	0	586370	356990	1058200	174090
D3ZUD8;D3ZCR2	D3ZUD8;D3ZCR2		Tm9sf3	>tr|D3ZUD8|D3ZUD8_RAT Protein Tm9sf3 OS=Rattus norvegicus GN=Tm9sf3 PE=4 SV=1;>tr|D3ZCR2|D3ZCR2_RAT Protein Tm9sf3 OS=Rattus norvegicus GN=Tm9sf3 PE=4 SV=1	67.544	587	1446700	2827800	18843000	31753000	2660900	23541000	1737000	1430100	9274800	22221000	11549000	10268000	1735500	612300	24458000	17041000	25726000	13973000
D3ZUF8	D3ZUF8		Vrk2	>tr|D3ZUF8|D3ZUF8_RAT Protein Vrk2 OS=Rattus norvegicus GN=Vrk2 PE=4 SV=1	26.215	229	0	0	0	0	0	0	0	0	0	0	0	0	0	0	0	0	1625600	0
D3ZUF9	D3ZUF9		Pitrm1	>tr|D3ZUF9|D3ZUF9_RAT Pitrilysin metallepetidase 1 (Predicted) OS=Rattus norvegicus GN=Pitrm1 PE=3 SV=1	108.54	954	1707000	3017300	20802000	21124000	11346000	20496000	1587700	2066600	20898000	30844000	13978000	27441000	1420600	1376300	15949000	25775000	26192000	7003000
D3ZUG4;D3ZUP1;D3ZNY7;M0R935;M0R5F7;D4A3Q1	D3ZUG4;D3ZUP1;D3ZNY7;M0R935;M0R5F7;D4A3Q1		LOC690460;LOC100365646;LOC689927;LOC690478	>tr|D3ZUG4|D3ZUG4_RAT Protein LOC690460 OS=Rattus norvegicus GN=LOC690460 PE=4 SV=1;>tr|D3ZUP1|D3ZUP1_RAT Protein LOC100365646 OS=Rattus norvegicus GN=LOC100365646 PE=4 SV=2;>tr|D3ZNY7|D3ZNY7_RAT Protein LOC689927 OS=Rattus norvegicus GN=LOC689927 PE=4 SV=	25.493	251	28946	247410	41512000	5182900	162320	1646900	1023000	918050	4175600	3256000	1045400	0	5719200	361690	0	3202500	3027100	0
D3ZUI1	D3ZUI1		Apip	>tr|D3ZUI1|D3ZUI1_RAT APAF1 interacting protein (Predicted), isoform CRA_b OS=Rattus norvegicus GN=Apip PE=4 SV=2	19.236	170	660230	1385700	6237800	6265300	41554	6215400	693810	369450	5715800	8900400	3110600	7807900	391710	402080	10737000	4718100	2906500	3607100
D3ZUI9	D3ZUI9		LOC690871	>tr|D3ZUI9|D3ZUI9_RAT Protein LOC690871 OS=Rattus norvegicus GN=LOC690871 PE=4 SV=1	7.7509	74	0	0	320240	1106200	1312900	1773500	0	0	1343500	2058900	874450	271810	0	0	0	635130	1372200	62862
D3ZUJ5	D3ZUJ5		Dtymk	>tr|D3ZUJ5|D3ZUJ5_RAT Deoxythymidylate kinase (Predicted), isoform CRA_b OS=Rattus norvegicus GN=Dtymk PE=3 SV=1	23.973	212	430810	491320	4776900	4654500	933320	1625700	246640	254320	1715000	1709100	1402400	300490	686680	484810	4321300	2941400	4971900	24634
D3ZUJ8	D3ZUJ8		Tmtc3	>tr|D3ZUJ8|D3ZUJ8_RAT Protein Tmtc3 OS=Rattus norvegicus GN=Tmtc3 PE=4 SV=1	104.06	920	0	0	90921	321220	0	165490	0	0	352290	269960	25232	0	0	0	74460	154320	238140	0
D3ZUJ9	D3ZUJ9		Snx8	>tr|D3ZUJ9|D3ZUJ9_RAT Protein Snx8 OS=Rattus norvegicus GN=Snx8 PE=4 SV=1	52.657	463	56666	77698	578090	823200	0	0	0	42798	528430	912100	136360	461410	38838	57987	687770	610900	477020	0
D3ZUL1	D3ZUL1		Ccdc124	>tr|D3ZUL1|D3ZUL1_RAT Protein Ccdc124 OS=Rattus norvegicus GN=Ccdc124 PE=4 SV=1	25.317	217	0	0	604040	432670	840940	968510	0	0	49669	1287700	422650	264870	0	0	0	224320	1112900	0
D3ZUL3	D3ZUL3		Col6a1	>tr|D3ZUL3|D3ZUL3_RAT Protein Col6a1 OS=Rattus norvegicus GN=Col6a1 PE=4 SV=1	108.8	1025	0	35827	530250	1145100	218060	208760	179590	258660	409940	317770	0	279180	160850	139560	170810	129430	19181	123810
D3ZUM4	D3ZUM4	Beta-galactosidase	Glb1	>tr|D3ZUM4|D3ZUM4_RAT Beta-galactosidase OS=Rattus norvegicus GN=Glb1 PE=1 SV=1	73.227	647	1677300	3284800	11978000	17430000	4396000	12828000	2092100	2220200	13936000	29627000	10331000	11887000	1111300	1315100	11717000	13155000	10480000	8106900
D3ZUP3;D3ZSL9	D3ZUP3;D3ZSL9		Slc27a2	>tr|D3ZUP3|D3ZUP3_RAT Very long-chain acyl-CoA synthetase OS=Rattus norvegicus GN=Slc27a2 PE=4 SV=2;>tr|D3ZSL9|D3ZSL9_RAT Very long-chain acyl-CoA synthetase OS=Rattus norvegicus GN=Slc27a2 PE=4 SV=2	70.612	619	0	0	0	0	0	0	257370	0	0	0	0	0	0	0	0	0	0	0
D3ZUP5	D3ZUP5		Brk1	>tr|D3ZUP5|D3ZUP5_RAT Protein Brk1 OS=Rattus norvegicus GN=Brk1 PE=4 SV=1	8.7608	75	109950	700070	2949900	2303500	7796800	7153500	241030	436090	3399300	5807200	2327100	1972100	300130	552380	4375800	838170	5834800	1557800
D3ZUP8	D3ZUP8		Lmbrd2	>tr|D3ZUP8|D3ZUP8_RAT Protein Lmbrd2 OS=Rattus norvegicus GN=Lmbrd2 PE=4 SV=1	81.081	694	0	0	167790	446630	0	96247	0	0	70468	256480	100710	46184	0	0	85053	426630	276450	34641
D3ZUQ2;M0R635;Q4V8K3;M0R7Q4	D3ZUQ2;M0R635;Q4V8K3	N-alpha-acetyltransferase 11	Naa10;LOC100909833;Naa11	>tr|D3ZUQ2|D3ZUQ2_RAT Protein Naa10 OS=Rattus norvegicus GN=Naa10 PE=4 SV=1;>tr|M0R635|M0R635_RAT Protein LOC100909833 OS=Rattus norvegicus GN=LOC100909833 PE=4 SV=1;>sp|Q4V8K3|NAA11_RAT N-alpha-acetyltransferase 11 OS=Rattus norvegicus GN=Naa11 PE=2 SV=1	26.611	235	0	0	5014900	9479000	0	4284800	0	0	3082200	3768800	2005100	2011900	0	340440	8168500	3365200	6561300	5856400
D3ZUQ7	D3ZUQ7		LOC100362038	>tr|D3ZUQ7|D3ZUQ7_RAT Pantothenate kinase 3 (Predicted) OS=Rattus norvegicus GN=Pank3 PE=4 SV=1	41.09	370	426800	242370	1876900	2996600	402660	3501700	174900	359590	1865300	3893500	2224600	1222300	1482000	756720	10521000	7649300	8647300	8503500
D3ZUT9	D3ZUT9		Ints3	>tr|D3ZUT9|D3ZUT9_RAT Protein Ints3 OS=Rattus norvegicus GN=Ints3 PE=4 SV=1	117.89	1041	13846	37299	139820	33219	0	0	1964.6	31698	0	0	0	0	38415	18903	0	90816	0	167630
D3ZUU5	D3ZUU5		Dnajb1	>tr|D3ZUU5|D3ZUU5_RAT DnaJ (Hsp40) homolog, subfamily B, member 1 (Predicted), isoform CRA_a OS=Rattus norvegicus GN=Dnajb1 PE=4 SV=1	41.532	371	570210	446050	4332000	882950	1000500	1679900	324910	211840	2940100	1636900	1658100	2425800	348730	121310	3897300	3747500	5005200	2950600
D3ZUU6	D3ZUU6		LOC100912012	>tr|D3ZUU6|D3ZUU6_RAT Protein LOC100912012 OS=Rattus norvegicus GN=LOC100912012 PE=4 SV=1	22.306	202	100200	499420	2916200	3839200	1120100	6322600	284630	318990	4918200	6242400	3490200	5066600	194900	272980	5128900	5107500	5739700	206210
D3ZUU8	D3ZUU8		Sec14l4	>tr|D3ZUU8|D3ZUU8_RAT Protein Sec14l4 OS=Rattus norvegicus GN=Sec14l4 PE=4 SV=1	47.018	412	73116000	97342000	485840000	457710000	272310000	464460000	54581000	87829000	312760000	704860000	439910000	494870000	45263000	63469000	365030000	506030000	361040000	263930000
D3ZUV2	D3ZUV2		Mib1	>tr|D3ZUV2|D3ZUV2_RAT Protein Mib1 OS=Rattus norvegicus GN=Mib1 PE=4 SV=2	110.1	1006	92421	139300	1000400	1407400	837750	1254900	57466	74114	595020	1333800	953640	1061300	0	62883	1232100	1244500	881670	409640
D3ZUV3	D3ZUV3		Eif2a	>tr|D3ZUV3|D3ZUV3_RAT Eukaryotic translation initiation factor 2 subunit 1 OS=Rattus norvegicus GN=Eif2a PE=4 SV=2	60.214	541	1687800	3136000	13890000	18329000	9261400	16103000	1867800	2508100	7298100	16497000	11170000	11823000	2155100	1529700	23066000	17393000	15525000	17541000
D3ZUX1	D3ZUX1		Agphd1	>tr|D3ZUX1|D3ZUX1_RAT Protein Hykk OS=Rattus norvegicus GN=Hykk PE=4 SV=1	42.475	376	5206000	15318000	7738600	35402000	6018000	35724000	7791400	11939000	41363000	86778000	10385000	61205000	3788400	1031200	38734000	42261000	23280000	88225000
D3ZUX5	D3ZUX5		Chchd3	>tr|D3ZUX5|D3ZUX5_RAT Coiled-coil-helix-coiled-coil-helix domain containing 3 (Predicted), isoform CRA_a OS=Rattus norvegicus GN=Chchd3 PE=4 SV=1	26.434	227	10278000	38347000	121890000	185210000	109070000	109880000	23101000	30002000	107240000	297700000	92126000	174550000	26387000	11631000	254970000	198930000	120360000	78660000
D3ZUX7	D3ZUX7		Acsf3	>tr|D3ZUX7|D3ZUX7_RAT Protein Acsf3 OS=Rattus norvegicus GN=Acsf3 PE=4 SV=1	65.265	583	1327300	2323000	14015000	19217000	16080000	11302000	1430100	2600700	14772000	22611000	15999000	14896000	838330	1611200	16007000	10432000	15314000	18712000
D3ZUY0	D3ZUY0		Rdh14	>tr|D3ZUY0|D3ZUY0_RAT Protein Rdh14 OS=Rattus norvegicus GN=Rdh14 PE=3 SV=1	36.195	334	293250	341600	4397200	5378500	707280	4863600	317890	342880	4137900	8443600	4304100	4704200	110460	135710	4493500	5560800	6074200	5590900
D3ZUY8	D3ZUY8		Ap2a1	>tr|D3ZUY8|D3ZUY8_RAT Adaptor protein complex AP-2, alpha 1 subunit (Predicted) OS=Rattus norvegicus GN=Ap2a1 PE=1 SV=1	107.67	977	829220	2024100	9713200	8944500	2934000	6653900	1648600	1243300	7562200	8946300	4889500	6956700	1236800	853610	12452000	7680600	9544600	4140200
D3ZUZ4	D3ZUZ4		Fam20b	>tr|D3ZUZ4|D3ZUZ4_RAT Protein Fam20b OS=Rattus norvegicus GN=Fam20b PE=4 SV=1	46.568	409	0	175430	600630	865870	456670	1113100	0	74914	0	1091400	602860	380700	21974	73871	652740	1231500	925990	1224300
D3ZV26	D3ZV26		Sft2d3	>tr|D3ZV26|D3ZV26_RAT Protein Sft2d3 OS=Rattus norvegicus GN=Sft2d3 PE=4 SV=2	22.351	217	0	0	2135000	604430	1238300	1201800	0	0	224280	629890	664720	968380	0	0	0	606530	1730700	0
D3ZV37	D3ZV37		Cisd3	>tr|D3ZV37|D3ZV37_RAT Protein Cisd3 OS=Rattus norvegicus GN=Cisd3 PE=4 SV=1	18.069	158	1808100	2966700	13675000	20476000	19821000	1477600	1496800	2698300	9569500	13158000	4523200	3832500	1741200	1921400	17983000	16789000	1368800	4975600
D3ZV63;D3ZV64;D3ZN01	D3ZV63;D3ZV64;D3ZN01		RGD1307830	>tr|D3ZV63|D3ZV63_RAT Protein RGD1307830 OS=Rattus norvegicus GN=RGD1307830 PE=4 SV=1;>tr|D3ZV64|D3ZV64_RAT Protein RGD1307830 OS=Rattus norvegicus GN=RGD1307830 PE=4 SV=1;>tr|D3ZN01|D3ZN01_RAT Protein RGD1307830 OS=Rattus norvegicus GN=RGD1307830 PE=4 SV=	50.063	447	1327800	928830	4870900	7895400	898380	4920700	791870	793140	1639500	10482000	6247900	4079200	585330	444940	3799400	7775200	3369400	1840800
D3ZV74	D3ZV74		Nudt7	>tr|D3ZV74|D3ZV74_RAT Protein Nudt7 OS=Rattus norvegicus GN=Nudt7 PE=4 SV=2	26.706	236	1467200	1861600	9220600	7174000	0	3902300	1082400	1545100	2919400	16320000	9011400	9962200	1070400	767170	4947500	5556900	4429300	2782900
D3ZV75	D3ZV75		Mfsd1	>tr|D3ZV75|D3ZV75_RAT Protein Mfsd1 OS=Rattus norvegicus GN=Mfsd1 PE=4 SV=1	51.2	464	0	0	795170	941120	0	1272100	0	0	545890	1918600	0	901830	0	0	450380	0	1456600	0
D3ZV82;M0RD12;D3ZQL3	D3ZV82		LOC685067	>tr|D3ZV82|D3ZV82_RAT Protein LOC685067 OS=Rattus norvegicus GN=LOC685067 PE=4 SV=2	71.481	627	1521100	2998300	5255300	7180700	8143800	5751300	1125900	849030	6316000	13286000	4334800	3960200	491530	1136500	8827500	9609600	6056100	4236100
D3ZV91	D3ZV91		L3hypdh	>tr|D3ZV91|D3ZV91_RAT Protein L3hypdh OS=Rattus norvegicus GN=L3hypdh PE=4 SV=1	37.914	354	4138800	3638400	24831000	31739000	17049000	29166000	3248200	2913000	22812000	24033000	14077000	20263000	2424500	2645100	26012000	20349000	12441000	29169000
D3ZV96	D3ZV96		Fam84b	>tr|D3ZV96|D3ZV96_RAT Protein Fam84b OS=Rattus norvegicus GN=Fam84b PE=4 SV=1	34.562	310	555930	1592700	4551600	7246600	4219600	6291100	155840	0	3696300	5986100	5159000	4935600	683370	1164800	5052800	5491700	10856000	9873900
D3ZVB3	D3ZVB3		Fam135a	>tr|D3ZVB3|D3ZVB3_RAT Protein Fam135a OS=Rattus norvegicus GN=Fam135a PE=4 SV=1	167.13	1507	0	0	451090	480800	549430	299270	0	0	227860	0	257340	796760	0	0	0	289390	500430	339780
D3ZVD8	D3ZVD8		Hdac6	>tr|D3ZVD8|D3ZVD8_RAT Protein LOC100911205 OS=Rattus norvegicus GN=Hdac6 PE=4 SV=2	125.88	1155	42901	176100	506690	92462	373320	404950	33664	88117	592120	1309100	391600	852130	76456	79573	817530	1174700	693830	735380
D3ZVG1	D3ZVG1		Mocs1	>tr|D3ZVG1|D3ZVG1_RAT Molybdenum cofactor synthesis 1 (Predicted), isoform CRA_b OS=Rattus norvegicus GN=Mocs1 PE=3 SV=1	53.585	480	33694	28869	987700	906950	538610	648140	40399	132470	493970	914830	918570	589740	64039	94387	814520	632740	891240	1153800
D3ZVG2	D3ZVG2		Slc35d1	>tr|D3ZVG2|D3ZVG2_RAT Protein Slc35d1 OS=Rattus norvegicus GN=Slc35d1 PE=4 SV=1	35.92	325	0	0	0	0	0	282020	0	0	0	0	0	0	0	0	0	0	0	0
D3ZVH0	D3ZVH0		Stradb	>tr|D3ZVH0|D3ZVH0_RAT Protein Stradb OS=Rattus norvegicus GN=Stradb PE=4 SV=1	46.898	418	74800	50598	0	0	0	984060	0	31157	625290	906030	0	0	0	0	316200	0	0	0
D3ZVH2	D3ZVH2		RGD1560831	>tr|D3ZVH2|D3ZVH2_RAT Protein RGD1560831 OS=Rattus norvegicus GN=RGD1560831 PE=3 SV=1	26.63	243	0	0	0	0	0	0	0	0	0	0	0	0	0	0	0	2275600	0	0
D3ZVI9	D3ZVI9		LOC100911365	>tr|D3ZVI9|D3ZVI9_RAT Parkinson disease 7 domain containing 1 (Predicted), isoform CRA_a OS=Rattus norvegicus GN=LOC100911365 PE=4 SV=1	23.263	220	646860	974520	2051700	1589200	2303900	5074100	454350	941670	1423400	4071600	3369400	5025000	797190	539080	0	3784200	6926300	132600
D3ZVM6	D3ZVM6		Siglec1	>tr|D3ZVM6|D3ZVM6_RAT Protein Siglec1 OS=Rattus norvegicus GN=Siglec1 PE=4 SV=2	173.66	1609	0	0	439500	297810	119070	149120	0	0	528450	401050	414960	115860	0	0	1026900	326630	861670	422070
D3ZVN7	D3ZVN7		Ppox	>tr|D3ZVN7|D3ZVN7_RAT Orexin OS=Rattus norvegicus GN=Ppox PE=4 SV=1	50.784	477	1743000	2630400	16991000	21251000	15359000	17664000	1801600	1410400	19199000	21175000	13657000	16671000	741270	1112600	16585000	11058000	13566000	15144000
D3ZVQ0	D3ZVQ0	Ubiquitin carboxyl-terminal hydrolase	LOC100911959	>tr|D3ZVQ0|D3ZVQ0_RAT Ubiquitin carboxyl-terminal hydrolase OS=Rattus norvegicus GN=Usp5 PE=3 SV=1	95.778	858	4807700	7087200	55159000	71681000	39209000	54674000	4834200	3798200	52526000	65061000	38333000	63739000	4466200	5336400	50421000	62428000	104990000	39741000
D3ZVR4	D3ZVR4		Mplkip	>tr|D3ZVR4|D3ZVR4_RAT Protein Mplkip OS=Rattus norvegicus GN=Mplkip PE=4 SV=2	19.063	178	0	0	0	0	309040	0	0	0	0	350480	163600	163700	0	0	0	268890	282740	143140
D3ZVR7	D3ZVR7	Prostamide/prostaglandin F synthase	Fam213b	>sp|D3ZVR7|PGFS_RAT Prostamide/prostaglandin F synthase OS=Rattus norvegicus GN=Fam213b PE=3 SV=1	21.607	201	1091300	874540	10910000	14304000	9046500	3484200	828810	965840	6862300	14968000	3143100	7542200	1355900	1271400	9119500	8937400	12257000	579370
D3ZVS2	D3ZVS2		L2hgdh	>tr|D3ZVS2|D3ZVS2_RAT L-2-hydroxyglutarate dehydrogenase (Predicted) OS=Rattus norvegicus GN=L2hgdh PE=4 SV=1	50.732	463	9477900	16632000	41734000	61567000	26815000	40487000	13929000	20669000	36476000	66623000	56748000	44248000	9070200	8649100	38846000	58221000	51938000	44977000
D3ZVT2	D3ZVT2		Thada	>tr|D3ZVT2|D3ZVT2_RAT Protein Thada OS=Rattus norvegicus GN=Thada PE=4 SV=1	217.24	1937	1516.6	0	178480	184500	30479	62289	2792.6	0	122140	426450	39197	124890	44810	15022	828250	297730	123820	153690
D3ZVT3	D3ZVT3		Card6	>tr|D3ZVT3|D3ZVT3_RAT Caspase recruitment domain family, member 6 (Predicted) OS=Rattus norvegicus GN=Card6 PE=4 SV=1	122.06	1098	0	0	5023200	548050	7445000	3792600	0	0	505440	3931400	716100	523460	0	0	5468300	39845	889220	0
D3ZVU4	D3ZVU4		Rbks	>tr|D3ZVU4|D3ZVU4_RAT Protein Rbks OS=Rattus norvegicus GN=Rbks PE=3 SV=1	33.974	323	12025000	23985000	98439000	96341000	25961000	73800000	10977000	13555000	64451000	89158000	45422000	67734000	7857800	10508000	99064000	69679000	35967000	61092000
D3ZW08	D3ZW08		Adsl	>tr|D3ZW08|D3ZW08_RAT Adenylosuccinate lyase OS=Rattus norvegicus GN=Adsl PE=3 SV=1	54.852	484	8670100	4924200	56390000	79448000	42118000	51030000	6897700	7933700	42567000	60811000	30376000	13951000	5357000	6581400	59877000	60014000	47436000	31690000
D3ZW15	D3ZW15		Sec24b	>tr|D3ZW15|D3ZW15_RAT Protein Sec24b OS=Rattus norvegicus GN=Sec24b PE=4 SV=1	134.71	1242	2162.7	26502	1139700	1385700	941270	1800100	0	22860	709550	1104300	457610	861300	34599	31493	1839700	1319100	655980	925350
D3ZW38	D3ZW38		Exosc6	>tr|D3ZW38|D3ZW38_RAT Protein Exosc6 OS=Rattus norvegicus GN=Exosc6 PE=4 SV=1	28.399	272	513910	0	2854300	5177600	0	2105100	485560	360870	0	4964100	3108000	1667400	345190	261830	5324800	2824200	5038400	4831100
D3ZW55	D3ZW55	Inosine triphosphate pyrophosphatase	Itpa	>sp|D3ZW55|ITPA_RAT Inosine triphosphate pyrophosphatase OS=Rattus norvegicus GN=Itpa PE=3 SV=1	21.927	198	8087300	11187000	82408000	83554000	33217000	116470000	8846200	5704700	65874000	83822000	61054000	87732000	6746400	6479500	58054000	70317000	84734000	2128700
D3ZWB1	D3ZWB1		Lsm1	>tr|D3ZWB1|D3ZWB1_RAT LSM1 homolog, U6 small nuclear RNA associated (S. cerevisiae) (Predicted) OS=Rattus norvegicus GN=Lsm1 PE=4 SV=1	15.221	133	86420	165660	2029700	5497400	2627300	1658000	56046	0	2978200	8364900	10460000	9469800	0	0	0	2526700	2737100	0
D3ZWC6	D3ZWC6		Sntb1	>tr|D3ZWC6|D3ZWC6_RAT Protein Sntb1 OS=Rattus norvegicus GN=Sntb1 PE=4 SV=1	58.292	539	242260	630900	2946500	3883600	2964900	9363700	998670	1090500	7166600	13504000	6787500	7108100	751800	848690	15817000	10295000	6079500	50624000
D3ZWD3	D3ZWD3		Pank1	>tr|D3ZWD3|D3ZWD3_RAT Pantothenate kinase 1 (Predicted), isoform CRA_a OS=Rattus norvegicus GN=Pank1 PE=4 SV=1	41.674	373	0	0	349060	321610	0	0	0	0	249960	339480	202560	0	0	0	842610	843920	1382200	1279600
D3ZWD6	D3ZWD6		C8a	>tr|D3ZWD6|D3ZWD6_RAT Complement component 8, alpha polypeptide (Predicted) OS=Rattus norvegicus GN=C8a PE=4 SV=1	66.273	587	574000	420870	4605300	4026500	2053200	2486000	433530	534180	4039700	1183400	1589300	1289600	446580	301950	2577000	3434300	2011100	1767400
D3ZWE1	D3ZWE1		RGD1306636	>tr|D3ZWE1|D3ZWE1_RAT Protein Asphd1 OS=Rattus norvegicus GN=Asphd1 PE=4 SV=2	38.197	360	0	0	0	0	0	0	0	25452000	0	0	0	0	0	0	0	0	0	0
D3ZWE3	D3ZWE3		Pof1b	>tr|D3ZWE3|D3ZWE3_RAT Premature ovarian failure 1B (Predicted) OS=Rattus norvegicus GN=Pof1b PE=4 SV=2	67.659	587	0	8631.2	431740	0	0	29788	4585200	11353	41364	0	93110	73118	0	3178.9	29948	0	0	37785
D3ZWF5	D3ZWF5		Eny2	>tr|D3ZWF5|D3ZWF5_RAT Transcription and mRNA export factor ENY2 OS=Rattus norvegicus GN=Eny2 PE=3 SV=1	11.528	101	0	383430	290560	4565800	8000200	6825900	107150	221770	276800	1701000	1585700	4577400	0	315500	517740	0	9610500	3287800
D3ZWG9	D3ZWG9		Ptar1	>tr|D3ZWG9|D3ZWG9_RAT Protein Ptar1 OS=Rattus norvegicus GN=Ptar1 PE=4 SV=1	48.223	425	67410	0	894400	134130	0	425620	62476	67643	3295000	231050	291590	482840	64965	49413	1387600	2681000	2718800	0
D3ZWH1	D3ZWH1		Stab1	>tr|D3ZWH1|D3ZWH1_RAT Protein Stab1 OS=Rattus norvegicus GN=Stab1 PE=4 SV=1	276.24	2572	88404	81360	518690	1855600	140730	1136400	116440	58756	1126300	890770	870980	769220	74193	26707	506630	559730	1305200	417940
D3ZWI4	D3ZWI4		Sgol2	>tr|D3ZWI4|D3ZWI4_RAT Protein Sgol2 OS=Rattus norvegicus GN=Sgol2 PE=4 SV=2	130.78	1164	0	0	0	0	251040	191510	0	0	107220	0	172410	415670	0	0	195710	104990	301180	0
D3ZWJ1	D3ZWJ1		Dnlz	>tr|D3ZWJ1|D3ZWJ1_RAT Protein Dnlz OS=Rattus norvegicus GN=Dnlz PE=4 SV=1	19.063	173	240390	488290	1690900	2239400	767060	542020	259100	451330	1292200	3496600	1372400	1835600	168900	221170	1424200	2046000	1962100	0
D3ZWL1	D3ZWL1		Skil	>tr|D3ZWL1|D3ZWL1_RAT Protein Skil OS=Rattus norvegicus GN=Skil PE=4 SV=1	76.363	677	0	0	0	0	0	1222100	0	0	0	1246300	309650	0	0	0	760300	0	0	175210
D3ZWL6	D3ZWL6	Adenosylhomocysteinase	Ahcyl2	>tr|D3ZWL6|D3ZWL6_RAT Adenosylhomocysteinase OS=Rattus norvegicus GN=Ahcyl2 PE=3 SV=2	66.396	611	236220	52069	0	732560	1580200	1064000	426960	41961	1179100	1000800	767150	778100	0	34748	1514400	3015000	1038600	0
D3ZWN1	D3ZWN1		Zfp259	>tr|D3ZWN1|D3ZWN1_RAT Protein Zfp259 OS=Rattus norvegicus GN=Zfp259 PE=4 SV=1	50.854	459	77425	724730	847980	2291100	2411500	3554100	35903	495840	1248000	3417100	2193600	2012600	221660	1045400	2968100	8374600	4041800	4278400
D3ZWR1	D3ZWR1		LOC100360582	>tr|D3ZWR1|D3ZWR1_RAT Protein Nt5c (Fragment) OS=Rattus norvegicus GN=Nt5c PE=4 SV=2	16.085	139	504130	796910	1636900	1884400	2912600	5220200	0	644990	5671400	9670900	2989600	4267900	565210	323060	3111100	3702600	0	0
D3ZWS2	D3ZWS2		LOC690000	>tr|D3ZWS2|D3ZWS2_RAT Protein 1600014C10Rik OS=Rattus norvegicus GN=LOC690000 PE=4 SV=1	15.07	141	923330	1121100	8235900	8651400	19153000	14503000	490910	745610	3514400	10494000	7475100	11599000	923810	1064600	13712000	3742400	25033000	3012100
D3ZWS6	D3ZWS6		Naa30	>tr|D3ZWS6|D3ZWS6_RAT Protein Naa30 OS=Rattus norvegicus GN=Naa30 PE=4 SV=2	39.112	362	925540	115870	0	659290	171680	655270	0	89042	120560	770840	462830	885900	0	0	0	650210	595960	0
D3ZWT2	D3ZWT2		Fitm2	>tr|D3ZWT2|D3ZWT2_RAT Protein Fitm2 OS=Rattus norvegicus GN=Fitm2 PE=4 SV=1	30.112	262	0	0	3135300	2949100	0	1937800	0	0	840980	1600500	1395600	1157400	0	0	913470	2745200	7657000	774940
D3ZWV7;G3V945;P51650-2;P51650	D3ZWV7;G3V945;P51650-2;P51650	Succinate-semialdehyde dehydrogenase, mitochondrial	Aldh5a1	>tr|D3ZWV7|D3ZWV7_RAT Succinate-semialdehyde dehydrogenase, mitochondrial OS=Rattus norvegicus GN=Aldh5a1 PE=3 SV=1;>tr|G3V945|G3V945_RAT Aldehyde dehydrogenase family 5, subfamily A1 OS=Rattus norvegicus GN=Aldh5a1 PE=3 SV=1;>sp|P51650-2|SSDH_RAT Isoform	52.811	495	17923000	18301000	60934000	82774000	68762000	90915000	14693000	17190000	55502000	87935000	41934000	42872000	10278000	7696900	54048000	64612000	39721000	44149000
D3ZWZ6;Q7TP50	D3ZWZ6		Igf2bp2	>tr|D3ZWZ6|D3ZWZ6_RAT Protein Igf2bp2 (Fragment) OS=Rattus norvegicus GN=Igf2bp2 PE=4 SV=2	56.58	513	335060	599230	1769800	1532000	250870	618770	982980	377630	2734000	1651000	444870	4344700	134270	543570	2228400	1757300	214370	2953200
D3ZX01	D3ZX01		Rps4y2	>tr|D3ZX01|D3ZX01_RAT 40S ribosomal protein S4 OS=Rattus norvegicus GN=Rps4y2 PE=3 SV=1	29.198	262	212870	305390	2526900	404110	289030	863060	0	255150	0	177480	851280	913090	212760	192800	0	0	1521800	1459800
D3ZX08	D3ZX08	Alanine--tRNA ligase, mitochondrial	Aars2	>sp|D3ZX08|SYAM_RAT Alanine--tRNA ligase, mitochondrial OS=Rattus norvegicus GN=Aars2 PE=3 SV=1	107.8	985	367070	569660	2798400	3005900	2637300	4598800	565950	616190	3451400	3119800	3153000	4132100	434190	376330	1551600	3375700	5064000	2499600
D3ZX38	D3ZX38		Pfdn1	>tr|D3ZX38|D3ZX38_RAT Prefoldin 1 (Predicted) OS=Rattus norvegicus GN=Pfdn1 PE=4 SV=1	14.255	122	1873200	2873500	23037000	48440000	48208000	46612000	2172800	2300400	24257000	55057000	15493000	20636000	3940500	1622100	56621000	17855000	15210000	595450
D3ZX42	D3ZX42		Rabgap1	>tr|D3ZX42|D3ZX42_RAT G protein-coupled receptor 21 (Predicted), isoform CRA_a OS=Rattus norvegicus GN=Rabgap1 PE=4 SV=1	120.96	1065	52082	234330	2197600	900900	819710	1169300	74272	121300	762120	1775500	717300	2368500	122580	110820	1355200	1369700	1556700	1464600
D3ZX69;P0C2C4	D3ZX69;P0C2C4	39S ribosomal protein L10, mitochondrial	Mrpl10	>tr|D3ZX69|D3ZX69_RAT 39S ribosomal protein L10, mitochondrial OS=Rattus norvegicus GN=Mrpl10 PE=3 SV=1;>sp|P0C2C4|RM10_RAT 39S ribosomal protein L10, mitochondrial OS=Rattus norvegicus GN=Mrpl10 PE=1 SV=1	29.465	262	224150	462360	4080200	4057400	543590	6833600	252710	357550	3442500	7464400	4169600	8685400	284150	299560	3254000	6013400	11973000	2589600
D3ZX79	D3ZX79		Ly6g6c	>tr|D3ZX79|D3ZX79_RAT Protein Ly6g6c OS=Rattus norvegicus GN=Ly6g6c PE=4 SV=1	13.995	126	0	0	149190	0	0	316810	0	0	0	0	0	0	0	0	0	0	36499	0
D3ZX87;P62902;D4ABZ9;D3ZU04;D3ZZ60;D3ZKU5;D4ACQ2;D3ZK34;D3ZVY6;D3Z8W1;D3Z8P3;D3ZVF5;D3ZLA5;D3ZAC7;D4ACA9;M0RB70;D3ZNA9;D3ZDE9;M0RB32;D4A172;F1LVW2	D3ZX87;P62902;D4ABZ9;D3ZU04;D3ZZ60;D3ZKU5;D4ACQ2	60S ribosomal protein L31	LOC100910017;Rpl31;Rpl31l4;LOC681356;RGD1564839;LOC690384	>tr|D3ZX87|D3ZX87_RAT Protein LOC100910017 OS=Rattus norvegicus GN=LOC100910017 PE=4 SV=1;>sp|P62902|RL31_RAT 60S ribosomal protein L31 OS=Rattus norvegicus GN=Rpl31 PE=2 SV=1;>tr|D4ABZ9|D4ABZ9_RAT Protein Rpl31l4 (Fragment) OS=Rattus norvegicus GN=Rpl31l4	14.262	124	17740000	89448000	224630000	572600000	230500000	391230000	25638000	31090000	179000000	279380000	193840000	279730000	50788000	21989000	311430000	213590000	395890000	35959000
D3ZXA6	D3ZXA6		Pdpr	>tr|D3ZXA6|D3ZXA6_RAT Protein Pdpr OS=Rattus norvegicus GN=Pdpr PE=3 SV=1	98.818	878	25119	0	13931000	435480	67534	0	41868	48155	5296000	651900	507460	241710	26911	8174.7	1738100	262430	231000	150710
D3ZXB0	D3ZXB0		Pnkd	>tr|D3ZXB0|D3ZXB0_RAT Protein Pnkd OS=Rattus norvegicus GN=Pnkd PE=3 SV=1	40.949	360	802480	2092800	8210600	3944200	7024300	5629200	409510	1850200	1504800	1855500	11819000	4276600	529910	527950	9816500	1422000	12568000	10147000
D3ZXD2;D3ZCF8	D3ZXD2;D3ZCF8		Abca8a	>tr|D3ZXD2|D3ZXD2_RAT Protein Abca8a (Fragment) OS=Rattus norvegicus GN=Abca8a PE=3 SV=2;>tr|D3ZCF8|D3ZCF8_RAT Protein Abca8a OS=Rattus norvegicus GN=Abca8a PE=3 SV=2	180.46	1588	857960	1639200	7187300	13767000	1498300	11984000	607460	1100200	7195400	10071000	5115900	7136300	905530	269960	6936000	7031100	6499900	4397900
D3ZXD8;D3ZR79	D3ZXD8;D3ZR79	Transmembrane protein 245	Tmem245	>sp|D3ZXD8|TM245_RAT Transmembrane protein 245 OS=Rattus norvegicus GN=Tmem245 PE=3 SV=1;>tr|D3ZR79|D3ZR79_RAT Transmembrane protein 245 OS=Rattus norvegicus GN=Tmem245 PE=4 SV=1	97.281	876	72706	93316	1068700	2855100	1693800	994820	34929	22905	300850	844050	498530	555510	77903	13396	386540	0	970930	750950
D3ZXF8	D3ZXF8		Mrpl43	>tr|D3ZXF8|D3ZXF8_RAT Mitochondrial ribosomal protein L43 (Predicted), isoform CRA_a OS=Rattus norvegicus GN=Mrpl43 PE=4 SV=2	13.167	117	818180	778900	323550	15805000	15678000	8009800	582970	309850	6624200	19236000	8875000	10718000	328220	0	0	11163000	15256000	2686200
D3ZXF9	D3ZXF9		Mrpl12	>tr|D3ZXF9|D3ZXF9_RAT Protein Mrpl12 OS=Rattus norvegicus GN=Mrpl12 PE=3 SV=1	29.441	276	3524900	3834100	42708000	35988000	16312000	31462000	3025600	3724000	30935000	58613000	13966000	23915000	2707600	2242100	1471700	57339000	26882000	48030
D3ZXH7	D3ZXH7		Thoc4	>tr|D3ZXH7|D3ZXH7_RAT Protein Alyref OS=Rattus norvegicus GN=Alyref PE=4 SV=1	19.915	189	3787300	5978300	38725000	13131000	29274000	23880000	3843500	5398900	30850000	35632000	18345000	24152000	3201800	2972200	47948000	23126000	25505000	8680900
D3ZXI2;D3ZP59	D3ZXI2;D3ZP59			>tr|D3ZXI2|D3ZXI2_RAT Protein Gm5611 OS=Rattus norvegicus GN=Gm5611 PE=4 SV=2;>tr|D3ZP59|D3ZP59_RAT Uncharacterized protein OS=Rattus norvegicus PE=4 SV=2	27.296	243	0	0	0	0	0	0	0	0	0	700150	0	0	0	0	0	469160	0	0
D3ZXJ5	D3ZXJ5		Eftud1	>tr|D3ZXJ5|D3ZXJ5_RAT Protein Eftud1 OS=Rattus norvegicus GN=Eftud1 PE=4 SV=2	125.69	1127	281200	526290	4970500	2882400	1652200	962100	305130	244570	2862000	4258400	1672000	2593400	522230	262910	4374900	3021700	3210700	1111000
D3ZXK3	D3ZXK3		Tacc2	>tr|D3ZXK3|D3ZXK3_RAT Protein Tacc2 OS=Rattus norvegicus GN=Tacc2 PE=4 SV=1	300.23	2834	40937	55347	865050	1281800	65464	321530	31659	93366	805110	1986900	256310	69829	52185	13044	436340	368890	91110	64012
D3ZXK4	D3ZXK4		Abhd11	>tr|D3ZXK4|D3ZXK4_RAT Protein Abhd11 OS=Rattus norvegicus GN=Abhd11 PE=4 SV=1	33.215	307	5792200	5136100	50292000	56712000	17489000	45536000	4870700	4189800	52496000	95549000	38644000	44300000	1429100	4293800	50715000	31113000	40337000	61463000
D3ZXL1	D3ZXL1		Arih1	>tr|D3ZXL1|D3ZXL1_RAT Protein Arih1 OS=Rattus norvegicus GN=Arih1 PE=4 SV=1	64.016	555	285210	233110	2109200	1914500	503240	2418400	254380	164470	730020	2141100	1012600	1118700	251150	132600	2125300	1657800	1160000	989360
D3ZXQ0	D3ZXQ0		Ces2g	>tr|D3ZXQ0|D3ZXQ0_RAT Protein Ces2g OS=Rattus norvegicus GN=Ces2g PE=4 SV=1	62.909	560	372350	708740	2209100	5979500	1204800	1931800	216590	599960	2872200	6697400	2842000	4245200	218950	380870	5104900	3786800	4695100	2324100
D3ZXQ2	D3ZXQ2		Camsap3	>tr|D3ZXQ2|D3ZXQ2_RAT Protein Camsap3 OS=Rattus norvegicus GN=Camsap3 PE=4 SV=2	136.74	1269	0	0	811310	0	90679	360790	0	0	589220	656530	201990	0	0	0	312770	292760	284650	0
D3ZXS6	D3ZXS6	Elongation factor 1-alpha	RGD1566344	>tr|D3ZXS6|D3ZXS6_RAT Elongation factor 1-alpha OS=Rattus norvegicus GN=RGD1566344 PE=3 SV=1	49.69	457	0	0	0	0	0	0	0	0	0	0	503530	0	0	0	0	0	0	0
D3ZXS8	D3ZXS8		Ube2k	>tr|D3ZXS8|D3ZXS8_RAT Huntingtin interacting protein 2 (Predicted), isoform CRA_a OS=Rattus norvegicus GN=Ube2k PE=3 SV=1	22.406	200	7145100	15392000	77059000	52765000	23995000	53729000	5880900	7718500	44997000	73870000	31972000	43426000	7335600	7293900	38918000	56386000	58396000	3533400
D3ZXT2;D4A3Q2	D3ZXT2;D4A3Q2		Stag2;Stag1	>tr|D3ZXT2|D3ZXT2_RAT Protein Stag2 OS=Rattus norvegicus GN=Stag2 PE=4 SV=1;>tr|D4A3Q2|D4A3Q2_RAT Protein Stag1 OS=Rattus norvegicus GN=Stag1 PE=4 SV=1	141.31	1231	37531	115300	561690	869160	81374	90689	0	55968	275270	361090	171400	269930	16286	19342	400120	129220	198000	154660
D3ZXW6	D3ZXW6		LOC100362458	>tr|D3ZXW6|D3ZXW6_RAT Protein Gigyf2 OS=Rattus norvegicus GN=Gigyf2 PE=4 SV=2	49.009	422	0	0	2323700	1050600	1156100	420470	0	0	544300	865440	0	449570	0	0	1994900	1606900	912530	262940
D3ZXY2	D3ZXY2		Pdzd8	>tr|D3ZXY2|D3ZXY2_RAT PDZ domain containing 8 (Predicted) OS=Rattus norvegicus GN=Pdzd8 PE=4 SV=1	128.25	1152	0	0	0	84353	62896	66766	0	0	34207	0	26680	0	0	0	28719	0	51053	0
D3ZXY4	D3ZXY4		Aldh8a1	>tr|D3ZXY4|D3ZXY4_RAT Protein Aldh8a1 OS=Rattus norvegicus GN=Aldh8a1 PE=3 SV=2	53.498	487	306900000	357750000	1487000000	1862700000	1035700000	1905200000	300240000	375140000	1273600000	1853500000	1194000000	1261300000	212100000	254940000	1510000000	1282600000	1544000000	1428800000
D3ZY02	D3ZY02		Athl1	>tr|D3ZY02|D3ZY02_RAT Protein Athl1 OS=Rattus norvegicus GN=Athl1 PE=4 SV=2	76.181	690	184120	370610	0	0	0	90007	172320	351280	0	237640	101230	212320	238980	197420	0	97106	0	96384
D3ZY16	D3ZY16		Trim65	>tr|D3ZY16|D3ZY16_RAT Protein Trim65 OS=Rattus norvegicus GN=Trim65 PE=4 SV=1	57.995	518	0	0	108740	159890	215890	0	0	0	80860	276050	171100	115480	0	0	348020	87906	374810	170800
D3ZY44	D3ZY44		Mrps2	>tr|D3ZY44|D3ZY44_RAT Protein Mrps2 OS=Rattus norvegicus GN=Mrps2 PE=3 SV=1	32.175	291	1026400	2221300	11024000	17563000	251700	12204000	876190	1658100	12324000	22112000	9976600	15677000	1332500	1187700	14964000	8641300	17246000	12472000
D3ZY50	D3ZY50		Atpaf1	>tr|D3ZY50|D3ZY50_RAT ATP synthase mitochondrial F1 complex assembly factor 1 (Predicted), isoform CRA_a OS=Rattus norvegicus GN=Atpaf1 PE=4 SV=1	38.649	348	842500	812320	8387000	8304200	1333700	9568900	932320	1325900	8588800	15251000	6804000	15320000	889560	584720	15645000	7609900	10707000	14973000
D3ZY51	D3ZY51		Pkp1	>tr|D3ZY51|D3ZY51_RAT Plakophilin 1 (Predicted) OS=Rattus norvegicus GN=Pkp1 PE=4 SV=2	67.217	605	9774.5	39680	11546000	5519200	1193400	13332000	7535300	319900	12726000	13612000	3005000	3322200	70449	28100	11622000	5899200	4528500	4886400
D3ZY54	D3ZY54		Slc30a5	>tr|D3ZY54|D3ZY54_RAT Protein Slc30a5 OS=Rattus norvegicus GN=Slc30a5 PE=4 SV=1	83.664	760	0	24420	234250	518760	0	196040	0	0	111630	477710	46756	171390	0	0	94513	432490	362030	105090
D3ZY71	D3ZY71		LOC100910137	>tr|D3ZY71|D3ZY71_RAT Protein LOC100910137 OS=Rattus norvegicus GN=LOC100910137 PE=4 SV=1	8.7558	76	136510	394620	1025200	3304200	5087400	5312400	231170	384490	2837100	5201100	2986200	4039300	60747	359970	2717600	1251500	6031900	348090
D3ZY91	D3ZY91		Clic3	>tr|D3ZY91|D3ZY91_RAT Chloride intracellular channel 3 OS=Rattus norvegicus GN=Clic3 PE=4 SV=1	26.776	237	0	51446	0	271130	265820	305520	0	0	901330	0	0	299710	87559	40279	0	0	0	0
D3ZY96	D3ZY96		Ngp	>tr|D3ZY96|D3ZY96_RAT Neutrophilic granule protein (Predicted) OS=Rattus norvegicus GN=Ngp PE=4 SV=1	19.381	168	0	0	0	0	0	0	0	0	0	0	0	0	0	0	0	0	467980	0
D3ZYE2;M0R8B5	D3ZYE2;M0R8B5		RGD1565617	>tr|D3ZYE2|D3ZYE2_RAT Uncharacterized protein OS=Rattus norvegicus GN=RGD1565617 PE=4 SV=2;>tr|M0R8B5|M0R8B5_RAT Uncharacterized protein OS=Rattus norvegicus PE=4 SV=1	12.377	113	540340	974910	0	0	0	0	1950000	1482800	11166000	0	0	0	763010	435060	0	0	0	0
D3ZYG0	D3ZYG0		Vav2	>tr|D3ZYG0|D3ZYG0_RAT Protein Vav2 OS=Rattus norvegicus GN=Vav2 PE=1 SV=1	99.838	868	0	0	796840	992080	303050	257450	0	0	75621	1088900	282950	358530	0	0	577020	423950	501180	241720
D3ZYH2	D3ZYH2		Vom2r42	>tr|D3ZYH2|D3ZYH2_RAT Protein Vom2r42 OS=Rattus norvegicus GN=Vom2r42 PE=4 SV=1	98.104	853	0	0	0	0	0	0	0	0	0	0	0	6022400	0	0	0	0	12588000	0
D3ZYK9	D3ZYK9		Npm3	>tr|D3ZYK9|D3ZYK9_RAT Protein Npm3 OS=Rattus norvegicus GN=Npm3 PE=4 SV=1	18.917	173	733200	1251600	12752000	9938900	8163000	13536000	532880	301320	5619100	11145000	773970	5489600	872850	661500	7745800	7399800	5947000	3980600
D3ZYL4	D3ZYL4		Mrpl50	>tr|D3ZYL4|D3ZYL4_RAT Mitochondrial ribosomal protein L50 (Predicted) OS=Rattus norvegicus GN=Mrpl50 PE=4 SV=1	18.319	159	1023300	2508600	34255000	46977000	46667000	50026000	2295100	2107700	37943000	54387000	31427000	37643000	940520	1127300	43365000	52953000	70019000	7027200
D3ZYM5	D3ZYM5		Mtss1	>tr|D3ZYM5|D3ZYM5_RAT Metastasis suppressor 1 (Predicted), isoform CRA_a OS=Rattus norvegicus GN=Mtss1 PE=4 SV=2	85.767	790	0	0	0	0	418250	723920	0	0	0	0	0	234220	0	0	523460	262040	451130	654120
D3ZYM7	D3ZYM7		Lyrm4	>tr|D3ZYM7|D3ZYM7_RAT RCG44066 OS=Rattus norvegicus GN=Lyrm4 PE=4 SV=1	10.816	91	5682500	11344000	62013000	63171000	69094000	53652000	10896000	13841000	47968000	111830000	54894000	66964000	9872400	5296900	52704000	40826000	71737000	24241000
D3ZYN0	D3ZYN0		Ccdc64	>tr|D3ZYN0|D3ZYN0_RAT Protein Ccdc64 (Fragment) OS=Rattus norvegicus GN=Ccdc64 PE=4 SV=2	64.495	572	0	0	0	467530	504360	570520	0	0	324960	548360	529570	515450	0	0	511370	1082900	450040	650270
D3ZYQ9	D3ZYQ9		Rnf20	>tr|D3ZYQ9|D3ZYQ9_RAT Protein Rnf20 OS=Rattus norvegicus GN=Rnf20 PE=1 SV=1	113.46	973	0	0	488900	271480	34176	229680	0	0	384680	152300	158260	249610	0	0	363770	247320	585570	255030
D3ZYR0	D3ZYR0		Arhgef12	>tr|D3ZYR0|D3ZYR0_RAT Protein Arhgef12 OS=Rattus norvegicus GN=Arhgef12 PE=4 SV=2	158.18	1414	0	16032	184010	89505	50120	168150	0	0	26117	74810	178950	387620	0	0	0	158580	290770	91710
D3ZYR1	D3ZYR1	FCH domain only protein 2	Fcho2	>sp|D3ZYR1|FCHO2_RAT FCH domain only protein 2 OS=Rattus norvegicus GN=Fcho2 PE=1 SV=1	88.711	809	20489	120550	328360	934250	0	1394600	82706	164270	300810	451930	347730	699820	0	53077	477120	490890	933690	708600
D3ZYS7;F1M2M6	D3ZYS7		G3bp1	>tr|D3ZYS7|D3ZYS7_RAT Protein G3bp1 OS=Rattus norvegicus GN=G3bp1 PE=4 SV=1	51.786	465	990760	1486800	15864000	20097000	17090000	17108000	2129600	1166300	9487800	24190000	9669300	7865900	1353200	1434000	31703000	31038000	18762000	8753300
D3ZYT2	D3ZYT2		Mrps5	>tr|D3ZYT2|D3ZYT2_RAT Mitochondrial ribosomal protein S5 (Predicted) OS=Rattus norvegicus GN=Mrps5 PE=3 SV=1	48.136	432	801040	914090	3929400	5289900	2504900	3255200	425600	792470	1929100	6303700	2219000	1563400	412160	335330	22814000	18794000	4582200	3396200
D3ZYU4	D3ZYU4		Cox20	>tr|D3ZYU4|D3ZYU4_RAT Protein Cox20 OS=Rattus norvegicus GN=Cox20 PE=4 SV=1	13.078	117	1020600	3251100	11557000	23175000	18926000	18994000	2284100	2281100	10033000	51047000	13489000	15916000	4422900	1900200	38348000	50213000	31830000	14079000
D3ZYW7;M0RAK4	D3ZYW7;M0RAK4	Frataxin, mitochondrial;Frataxin intermediate form;Frataxin mature form	Fxn	>sp|D3ZYW7|FRDA_RAT Frataxin, mitochondrial OS=Rattus norvegicus GN=Fxn PE=1 SV=1;>tr|M0RAK4|M0RAK4_RAT Frataxin, mitochondrial OS=Rattus norvegicus GN=Fxn PE=4 SV=1	23.066	208	1394700	3913600	8865700	14353000	9430500	10859000	2419800	2858700	2523300	22549000	15012000	10553000	1904700	656510	10377000	870830	17559000	12003
D3ZYX8	D3ZYX8		Cox7a2l	>tr|D3ZYX8|D3ZYX8_RAT Cytochrome c oxidase subunit VIIa polypeptide 2 like (Predicted), isoform CRA_e OS=Rattus norvegicus GN=Cox7a2l PE=4 SV=1	13.273	120	11849000	8041000	58902000	72375000	86227000	87360000	5322600	10334000	28676000	139500000	40921000	60267000	17440000	6507600	47427000	71741000	103150000	41245000
D3ZYY0	D3ZYY0		Sdr39u1	>tr|D3ZYY0|D3ZYY0_RAT Protein Sdr39u1 OS=Rattus norvegicus GN=Sdr39u1 PE=4 SV=1	31.943	298	930430	228240	840180	1020500	334250	10909000	392340	953960	1017000	1844200	2531900	5520600	465110	266680	1127500	2790900	4011800	7301400
D3ZZ19	D3ZZ19		Tmem2	>tr|D3ZZ19|D3ZZ19_RAT Protein Tmem2 OS=Rattus norvegicus GN=Tmem2 PE=4 SV=1	152.74	1371	127000	144560	717460	1880600	771190	1646300	16315	140100	748670	1013000	1312500	1481600	39762	63206	1534200	1314100	1223100	1540000
D3ZZ20	D3ZZ20		Afg3l1	>tr|D3ZZ20|D3ZZ20_RAT Protein Afg3l1 OS=Rattus norvegicus GN=Afg3l1 PE=3 SV=2	87.202	789	69681	230560	2110300	1926800	1222600	1144500	50916	257740	1119500	3234500	1336800	1231100	155470	52087	2403800	2526200	1279500	1027300
D3ZZ21	D3ZZ21		Ndufb6	>tr|D3ZZ21|D3ZZ21_RAT NADH dehydrogenase (Ubiquinone) 1 beta subcomplex, 6 (Predicted) OS=Rattus norvegicus GN=Ndufb6 PE=4 SV=1	15.638	128	7830400	10829000	64365000	138970000	81237000	79057000	10711000	17418000	107510000	205790000	72268000	99142000	10963000	6144900	85404000	142700000	111000000	20472000
D3ZZ48	D3ZZ48		Slc35a1	>tr|D3ZZ48|D3ZZ48_RAT Protein Slc35a1 OS=Rattus norvegicus GN=Slc35a1 PE=4 SV=2	34.256	317	104830	452360	1901000	2782500	0	1430000	0	98923	731100	2467200	279940	224000	289670	0	2248700	1591300	2200200	299090
D3ZZ62	D3ZZ62		Xpot	>tr|D3ZZ62|D3ZZ62_RAT Exportin, tRNA (Nuclear export receptor for tRNAs) (Predicted), isoform CRA_a OS=Rattus norvegicus GN=Xpot PE=4 SV=1	83.483	728	247420	423660	0	0	52593	1464300	123210	325390	319950	140610	686400	1326300	266320	285750	842890	702500	2019200	475380
D3ZZ94	D3ZZ94		Parp10	>tr|D3ZZ94|D3ZZ94_RAT Protein Parp10 OS=Rattus norvegicus GN=Parp10 PE=4 SV=1	103.63	955	0	30183	620660	166830	604490	462560	0	0	347180	404130	532290	472520	53000	50166	1582000	380000	473330	615400
D3ZZ95;F1M706;D3ZJJ6;D4A1Q0;P39032;M0RCN1	D3ZZ95;F1M706;D3ZJJ6;D4A1Q0;P39032;M0RCN1	60S ribosomal protein L36	LOC100361060;LOC100360439;RGD1563135;LOC100361644;Rpl36;LOC100361079	>tr|D3ZZ95|D3ZZ95_RAT 60S ribosomal protein L36 OS=Rattus norvegicus GN=LOC100361060 PE=3 SV=1;>tr|F1M706|F1M706_RAT 60S ribosomal protein L36 OS=Rattus norvegicus GN=LOC100360439 PE=3 SV=1;>tr|D3ZJJ6|D3ZJJ6_RAT 60S ribosomal protein L36 OS=Rattus norvegic	12.41	106	21303000	55312000	241450000	396330000	89921000	267420000	30056000	45136000	141520000	145650000	132170000	166830000	34638000	34043000	259370000	211340000	282520000	112120000
D3ZZA8	D3ZZA8		Sec24a	>tr|D3ZZA8|D3ZZA8_RAT Protein Sec24a OS=Rattus norvegicus GN=Sec24a PE=4 SV=1	118.87	1089	2510800	4836400	34460000	30866000	24362000	28744000	2715300	2634500	21363000	30837000	18145000	23446000	2748700	2389500	38200000	30739000	33919000	21853000
D3ZZB0	D3ZZB0		Dip2c	>tr|D3ZZB0|D3ZZB0_RAT Protein Dip2c OS=Rattus norvegicus GN=Dip2c PE=4 SV=1	176.89	1612	0	0	68117	73512	14186	40883	0	0	10592	30775	15011	36556	0	0	44283	294600	15056	0
D3ZZB2	D3ZZB2		Pex1	>tr|D3ZZB2|D3ZZB2_RAT Similar to peroxisome biogenesis factor 1 (Predicted) OS=Rattus norvegicus GN=Pex1 PE=3 SV=1	141.4	1283	438880	604070	3725400	5382600	4392200	3510400	400550	322160	2247200	5078500	3140100	4468200	461460	284590	5963300	4123700	5930500	3455900
D3ZZC1	D3ZZC1		Txndc5	>tr|D3ZZC1|D3ZZC1_RAT Protein Txndc5 OS=Rattus norvegicus GN=Txndc5 PE=3 SV=1	46.353	417	10136000	15015000	66870000	131540000	67405000	104740000	5617400	10665000	45844000	94009000	63360000	60895000	7568000	9642000	89245000	77437000	82921000	82140000
D3ZZC5	D3ZZC5		Tradd	>tr|D3ZZC5|D3ZZC5_RAT Protein Tradd OS=Rattus norvegicus GN=Tradd PE=4 SV=1	34.53	310	93082	332890	0	0	0	0	0	126310	0	0	0	0	0	116950	0	0	0	0
D3ZZE3	D3ZZE3		RGD1564887	>tr|D3ZZE3|D3ZZE3_RAT Protein RGD1564887 (Fragment) OS=Rattus norvegicus GN=RGD1564887 PE=4 SV=2	74.774	655	0	0	0	0	274010	619980	0	0	0	0	350570	615150	0	0	0	0	777020	0
D3ZZF8;M0RCT0	D3ZZF8		Paip1	>tr|D3ZZF8|D3ZZF8_RAT Polyadenylate binding protein-interacting protein 1 (Predicted) OS=Rattus norvegicus GN=Paip1 PE=4 SV=2	42.06	367	1372000	1953200	3803600	4717200	4831700	4404800	972860	962500	3225300	12975000	3127000	2713300	942570	556780	7400300	6685900	5071500	337350
D3ZZH7	D3ZZH7		Rsbn1l	>tr|D3ZZH7|D3ZZH7_RAT Protein Rsbn1l OS=Rattus norvegicus GN=Rsbn1l PE=4 SV=1	92.31	824	0	0	583660	1438600	1051100	839320	0	0	1845000	2803300	783110	4220200	0	0	0	154040	858150	0
D3ZZI6	D3ZZI6		Dsc3	>tr|D3ZZI6|D3ZZI6_RAT Desmocollin 3 (Predicted) OS=Rattus norvegicus GN=Dsc3 PE=4 SV=1	100.72	900	0	0	0	0	0	0	101410	0	0	0	0	0	1352.5	0	0	0	0	0
D3ZZL3	D3ZZL3		Naglu	>tr|D3ZZL3|D3ZZL3_RAT Protein Naglu OS=Rattus norvegicus GN=Naglu PE=4 SV=2	82.411	739	224950	80589	3949000	4543200	2217100	2158300	98981	79121	3953600	6313200	2651400	3387200	84136	93019	5071000	4519300	3191900	2341400
D3ZZL9	D3ZZL9	GRIP and coiled-coil domain-containing protein 2	Gcc2	>sp|D3ZZL9|GCC2_RAT GRIP and coiled-coil domain-containing protein 2 OS=Rattus norvegicus GN=Gcc2 PE=1 SV=1	195.08	1679	128850	165560	1495100	998700	176210	657020	114770	136770	1369800	1032000	494110	965010	79077	87331	1172700	1114400	849600	949030
D3ZZM0	D3ZZM0		Slc39a14	>tr|D3ZZM0|D3ZZM0_RAT Protein Slc39a14 OS=Rattus norvegicus GN=Slc39a14 PE=4 SV=1	54.213	490	66660	230800	606610	7089900	194720	5697800	8395.1	0	1602200	1903900	2102000	4272900	107630	9331	567400	3398500	7361400	6480100
D3ZZM3	D3ZZM3		Cog4	>tr|D3ZZM3|D3ZZM3_RAT Component of oligomeric golgi complex 4 (Predicted) OS=Rattus norvegicus GN=Cog4 PE=4 SV=1	88.602	785	141800	4946300	1779900	608900	10788000	355460	148660	41420	1050100	550120	284690	1179400	230930	205680	1549900	1667700	867910	1407200
D3ZZQ4	D3ZZQ4		Aamdc	>tr|D3ZZQ4|D3ZZQ4_RAT Protein Aamdc OS=Rattus norvegicus GN=Aamdc PE=4 SV=1	13.502	124	415800	996420	2653600	7548700	465460	1314900	564250	409730	2723400	2064600	0	0	274670	330760	3174900	1359600	0	1221600
D3ZZR3;Q02765	D3ZZR3;Q02765	Cathepsin S	Ctss	>tr|D3ZZR3|D3ZZR3_RAT Cathepsin S OS=Rattus norvegicus GN=Ctss PE=3 SV=2;>sp|Q02765|CATS_RAT Cathepsin S OS=Rattus norvegicus GN=Ctss PE=2 SV=1	36.249	329	1207800	2198900	14598000	8300500	508370	7149600	2687800	1712300	25790000	34308000	8758200	8085200	770980	1491700	8476400	17341000	9914200	0
D3ZZR5;D3ZLF6	D3ZZR5;D3ZLF6		Snrpa1	>tr|D3ZZR5|D3ZZR5_RAT Protein Snrpa1 OS=Rattus norvegicus GN=Snrpa1 PE=4 SV=1;>tr|D3ZLF6|D3ZLF6_RAT Protein Snrpa1 OS=Rattus norvegicus GN=Snrpa1 PE=4 SV=2	28.317	255	2768900	8121800	17541000	24053000	1123100	17587000	4055700	7452900	19871000	40575000	16579000	25579000	4356100	2981500	35393000	27078000	17435000	13424000
D3ZZR9	D3ZZR9	Peptidyl-prolyl cis-trans isomerase	Fkbp2	>tr|D3ZZR9|D3ZZR9_RAT Peptidyl-prolyl cis-trans isomerase OS=Rattus norvegicus GN=Fkbp2 PE=4 SV=1	15.388	140	17385000	20007000	227550000	206840000	218750000	238890000	12891000	12546000	164520000	243810000	132460000	243880000	16275000	3961400	166990000	259850000	385840000	13045000
D3ZZT9	D3ZZT9		Col14a1	>tr|D3ZZT9|D3ZZT9_RAT Protein Col14a1 OS=Rattus norvegicus GN=Col14a1 PE=4 SV=2	192.53	1793	795400	1538400	11054000	10736000	1485000	6813700	1044000	1735400	7771900	16715000	8126900	11283000	521830	342850	8519300	7944000	5497000	5399400
D3ZZU4	D3ZZU4		Tmem160	>tr|D3ZZU4|D3ZZU4_RAT Protein Tmem160 OS=Rattus norvegicus GN=Tmem160 PE=4 SV=1	19.587	188	1382300	2228100	10185000	12474000	790990	10912000	1115500	1896000	8408500	19014000	6902700	10740000	863070	544530	14312000	7678300	8621000	2562400
D3ZZU8	D3ZZU8		Fn3k	>tr|D3ZZU8|D3ZZU8_RAT Protein Fn3k OS=Rattus norvegicus GN=Fn3k PE=4 SV=2	23.575	203	627570	0	0	1488600	0	0	0	0	2312400	2874500	0	1860300	0	0	26158	0	1816100	1422900
D3ZZV1;Q6EIX2	D3ZZV1		Pam16	>tr|D3ZZV1|D3ZZV1_RAT Mitochondrial import inner membrane translocase subunit TIM16 OS=Rattus norvegicus GN=Pam16 PE=4 SV=1	13.771	125	5571600	10294000	48130000	67271000	48457000	49452000	11102000	8615100	40918000	72679000	39308000	35024000	8839800	3198900	58387000	48025000	65613000	16220000
D3ZZW1	D3ZZW1		Dock1	>tr|D3ZZW1|D3ZZW1_RAT Protein LOC100909609 OS=Rattus norvegicus GN=Dock1 PE=4 SV=1	214.96	1864	13890	44465	1242500	853400	553330	996040	4351	43849	594970	439200	870650	985180	30117	36344	368800	192910	971630	1097700
D3ZZY4;D4A2X6	D3ZZY4;D4A2X6		LOC100360426	>tr|D3ZZY4|D3ZZY4_RAT Protein Tomm5 OS=Rattus norvegicus GN=LOC100360426 PE=4 SV=1;>tr|D4A2X6|D4A2X6_RAT Protein Tomm5 OS=Rattus norvegicus GN=LOC100360426 PE=4 SV=2	6.0372	51	327870	3048600	19436000	35555000	16602000	12557000	1737800	531730	25279000	23909000	12999000	5117200	1599700	468310	11143000	6256100	15873000	110990
D3ZZZ5	D3ZZZ5		Ppcdc	>tr|D3ZZZ5|D3ZZZ5_RAT Phosphopantothenoylcysteine decarboxylase (Predicted), isoform CRA_a OS=Rattus norvegicus GN=Ppcdc PE=4 SV=1	26.553	242	325490	254060	0	0	0	1433800	163380	92694	1000800	1551400	1042600	1456100	47269	129420	0	0	1529700	0
D3ZZZ9	D3ZZZ9		Ctnnd1	>tr|D3ZZZ9|D3ZZZ9_RAT Catenin (Cadherin associated protein), delta 1 (Predicted), isoform CRA_a OS=Rattus norvegicus GN=Ctnnd1 PE=1 SV=1	104.07	932	498130	1104500	7573700	12454000	12937000	4563500	630040	875940	3700000	19518000	4539300	7345000	959390	916570	7991900	9715100	7265800	4752000
D4A031	D4A031		Ddx42	>tr|D4A031|D4A031_RAT DEAD (Asp-Glu-Ala-Asp) box polypeptide 42 (Predicted) OS=Rattus norvegicus GN=Ddx42 PE=3 SV=1	102.07	929	216870	5019200	2068200	2217000	1617400	2495700	4424600	211710	1982700	3096100	1377600	3327400	252330	4520600	2210600	3630400	3422300	2067000
D4A040;D4A0K2	D4A040;D4A0K2		Mrps11;LOC690271	>tr|D4A040|D4A040_RAT Protein Mrps11 OS=Rattus norvegicus GN=Mrps11 PE=3 SV=1;>tr|D4A0K2|D4A0K2_RAT Protein LOC690271 OS=Rattus norvegicus GN=LOC690271 PE=3 SV=2	20.168	191	973980	1171400	7329100	18277000	10078000	7428500	1101700	1152700	6799900	14571000	6032900	8536400	663640	572370	4920000	9678600	5276400	61890
D4A054;M0R3M4	D4A054;M0R3M4		Ranbp2;LOC100911178	>tr|D4A054|D4A054_RAT Protein LOC100911178 OS=Rattus norvegicus GN=Ranbp2 PE=1 SV=1;>tr|M0R3M4|M0R3M4_RAT Protein LOC100911178 OS=Rattus norvegicus GN=LOC100911178 PE=4 SV=1	341.03	3055	115980	209700	2071200	686550	619560	636080	167380	333990	1151900	1286700	458270	520430	194580	92131	2635700	1308700	820030	988520
D4A099	D4A099		Nsun4	>tr|D4A099|D4A099_RAT NOL1/NOP2/Sun domain family, member 4 (Predicted) OS=Rattus norvegicus GN=Nsun4 PE=4 SV=1	42.612	381	0	0	894840	2437600	458990	1389500	0	0	0	2556000	783240	1683000	0	0	3683500	2073100	869300	2206700
D4A0C8	D4A0C8		RGD1564340	>tr|D4A0C8|D4A0C8_RAT Protein RGD1564340 OS=Rattus norvegicus GN=RGD1564340 PE=4 SV=1	38.191	333	0	0	931990	0	0	80714	0	0	0	0	0	0	0	0	0	0	0	0
D4A0E2	D4A0E2		Napg	>tr|D4A0E2|D4A0E2_RAT Protein Napg OS=Rattus norvegicus GN=Napg PE=4 SV=1	25.602	230	2809200	5799000	22990000	36892000	14641000	29542000	2622700	3002300	22586000	30448000	15646000	18521000	2461000	2865800	28001000	29733000	35871000	24801000
D4A0E8	D4A0E8		Prmt5	>tr|D4A0E8|D4A0E8_RAT Protein arginine N-methyltransferase 5 OS=Rattus norvegicus GN=Prmt5 PE=3 SV=1	72.694	637	114690	377040	2458000	3006000	2917500	3729600	290460	155020	1732100	2210200	3066600	4206100	289450	302080	2148000	2740200	5137800	3930100
D4A0H1	D4A0H1		Reep3	>tr|D4A0H1|D4A0H1_RAT Protein Reep3 OS=Rattus norvegicus GN=Reep3 PE=4 SV=1	28.654	250	0	186470	577600	6442600	1715500	0	0	0	2036600	3698500	1068400	22196	47354	0	3085800	2903900	3540700	59711
D4A0H4	D4A0H4		Cul2	>tr|D4A0H4|D4A0H4_RAT Cullin 2 (Predicted), isoform CRA_a OS=Rattus norvegicus GN=Cul2 PE=3 SV=1	84.782	725	1735000	2096200	12497000	9668600	6252700	7298000	986650	1352200	7261200	12956000	6580000	7644100	1313000	1224200	12254000	11424000	11839000	7509700
D4A0H5	D4A0H5		Cpsf1	>tr|D4A0H5|D4A0H5_RAT Cleavage and polyadenylation specific factor 1, 160kDa (Predicted), isoform CRA_a OS=Rattus norvegicus GN=Cpsf1 PE=4 SV=1	154.88	1386	29792	114600	1065100	1222200	50183	814650	58960	74230	1183100	1266200	590500	725380	17883	9113.5	2057500	385060	1137200	435470
D4A0I6	D4A0I6		LOC100910823	>tr|D4A0I6|D4A0I6_RAT Protein LOC100910823 (Fragment) OS=Rattus norvegicus GN=LOC100910823 PE=4 SV=2	18.845	165	1122000	2755100	15107000	28924000	23640000	55039000	2568400	2897000	10409000	19869000	13048000	50016000	2950800	165710	13010000	34297000	77999000	32323000
D4A0T0	D4A0T0		Ndufb10	>tr|D4A0T0|D4A0T0_RAT Protein Ndufb10 OS=Rattus norvegicus GN=Ndufb10 PE=4 SV=1	20.858	176	19590000	49254000	192470000	71102000	203900000	196450000	27085000	37133000	81795000	361960000	72839000	128650000	17869000	15696000	152540000	160930000	260950000	28473000
D4A0T2	D4A0T2		Ivns1abp_predicted	>tr|D4A0T2|D4A0T2_RAT Influenza virus NS1A binding protein (Predicted), isoform CRA_d OS=Rattus norvegicus GN=Ivns1abp PE=4 SV=1	25.333	221	0	0	0	0	0	1036600	0	0	0	0	0	0	0	0	0	0	0	0
D4A0T8	D4A0T8		RGD1565002	>tr|D4A0T8|D4A0T8_RAT Protein Dhrs7 OS=Rattus norvegicus GN=Dhrs7 PE=3 SV=2	34.32	303	1703100	1576300	6123200	7433400	1917300	8267900	359930	844310	9961600	11940000	7623000	30611000	451690	680470	8863600	8587100	8142100	5937400
D4A0W1	D4A0W1		Emc4	>tr|D4A0W1|D4A0W1_RAT Protein Emc4 OS=Rattus norvegicus GN=Emc4 PE=4 SV=1	20.158	183	3527700	5662400	25122000	30348000	17457000	16762000	2316500	1967800	13824000	22922000	11943000	12274000	3081300	1545500	25996000	15517000	15840000	2573500
D4A0W7	D4A0W7		Fndc3b	>tr|D4A0W7|D4A0W7_RAT Protein Fndc3b OS=Rattus norvegicus GN=Fndc3b PE=4 SV=2	132.78	1207	66207	136100	937990	1318000	945410	807120	0	28124	367520	684210	684680	587060	93670	49557	1267000	1250000	1407800	419080
D4A0Y4	D4A0Y4		Oxnad1	>tr|D4A0Y4|D4A0Y4_RAT Oxidoreductase NAD-binding domain containing 1 (Predicted), isoform CRA_b OS=Rattus norvegicus GN=Oxnad1 PE=4 SV=1	37.427	334	2938500	2838600	18390000	23393000	1564700	13610000	2267700	2490300	18825000	17597000	9586000	14171000	1283300	1412500	16012000	10712000	13674000	17755000
D4A104	D4A104		Mrpl45	>tr|D4A104|D4A104_RAT Mitochondrial ribosomal protein L45 (Predicted) OS=Rattus norvegicus GN=Mrpl45 PE=4 SV=1	35.439	306	627130	808000	3128400	6116200	2023900	4900900	974650	895050	3395800	11153000	3407500	5280800	620050	737870	2326000	5214000	4278900	6410600
D4A105	D4A105		Tmem63b	>tr|D4A105|D4A105_RAT Protein Tmem63b OS=Rattus norvegicus GN=Tmem63b PE=4 SV=2	94.744	832	0	0	319410	147100	0	171520	0	0	119930	520960	0	257090	0	0	349860	104190	0	0
D4A111;D4A115	D4A111;D4A115		Col6a3	>tr|D4A111|D4A111_RAT Protein Col6a3 OS=Rattus norvegicus GN=Col6a3 PE=4 SV=2;>tr|D4A115|D4A115_RAT Protein Col6a3 OS=Rattus norvegicus GN=Col6a3 PE=4 SV=2	306.15	2819	1583800	6535200	43708000	43090000	36321000	18033000	4883400	4655200	19314000	56963000	39514000	42101000	5334200	6380900	42035000	73915000	45963000	37506000
D4A131	D4A131		Mrpl4	>tr|D4A131|D4A131_RAT Mitochondrial ribosomal protein L4 (Predicted), isoform CRA_b OS=Rattus norvegicus GN=Mrpl4 PE=3 SV=1	33.082	294	1269500	1848900	12429000	17671000	270450	8051400	783550	1573400	9197600	21370000	9729300	8421200	966630	732550	14689000	13272000	9039900	15526000
D4A132	D4A132		Ugt2b10	>tr|D4A132|D4A132_RAT Protein Ugt2b10 OS=Rattus norvegicus GN=Ugt2b10 PE=3 SV=1	61.093	532	3018500	2844700	37824000	55327000	17057000	61334000	2894400	4121100	15990000	34266000	35458000	32292000	3421100	2335500	40275000	21520000	58570000	25608000
D4A133;M0RBP6	D4A133;M0RBP6		Atp6v1a	>tr|D4A133|D4A133_RAT Protein Atp6v1a OS=Rattus norvegicus GN=Atp6v1a PE=3 SV=1;>tr|M0RBP6|M0RBP6_RAT Uncharacterized protein OS=Rattus norvegicus PE=3 SV=1	68.264	617	4744300	5742100	27814000	38451000	32308000	25582000	6113700	5509500	28381000	45281000	30516000	33959000	4289600	4710700	44308000	52156000	38778000	36184000
D4A147	D4A147		Ugt2a3	>tr|D4A147|D4A147_RAT Protein Ugt2a3 OS=Rattus norvegicus GN=Ugt2a3 PE=3 SV=2	51.412	453	2078400	1598800	0	1404600	984550	974720	4298000	969920	433660	1658700	2354800	985820	3926600	889170	4668400	3154700	814310	1853100
D4A157	D4A157		Rpp14	>tr|D4A157|D4A157_RAT Protein Rpp14 OS=Rattus norvegicus GN=Rpp14 PE=4 SV=1	13.369	122	0	0	0	0	150000	0	0	0	140050	732180	284530	271850	0	0	334880	686950	0	0
D4A181	D4A181		Mettl13	>tr|D4A181|D4A181_RAT Protein Mettl13 OS=Rattus norvegicus GN=Mettl13 PE=4 SV=1	79.597	705	188440	460630	2133300	3183900	1598900	2207100	93402	230690	1442000	2126500	1725600	1416700	85272	192920	2124800	2199900	2512800	1635500
D4A183	D4A183		Vnn3	>tr|D4A183|D4A183_RAT Protein Vnn3 OS=Rattus norvegicus GN=Vnn3 PE=4 SV=1	56.421	500	0	0	0	144800	102070	381590	0	0	851540	274920	35944	0	0	0	0	91092	108070	0
D4A190	D4A190		Eif3k	>tr|D4A190|D4A190_RAT Eukaryotic translation initiation factor 3, subunit 12 (Predicted), isoform CRA_b OS=Rattus norvegicus GN=Eif3k PE=4 SV=1	12.359	107	1342200	3173900	16941000	16758000	1163800	28808000	540000	772890	4517100	17913000	14078000	22788000	960910	684020	17116000	17157000	43663000	588540
D4A197	D4A197		Mcee	>tr|D4A197|D4A197_RAT Methylmalonyl CoA epimerase (Predicted), isoform CRA_d OS=Rattus norvegicus GN=Mcee PE=4 SV=1	18.816	178	3620400	6234100	27564000	28962000	99018000	69213000	7191700	10043000	26461000	64485000	36317000	45329000	7261300	2501500	40229000	20418000	86132000	4968000
D4A1B2	D4A1B2		RGD1311021	>tr|D4A1B2|D4A1B2_RAT Protein RGD1311021 OS=Rattus norvegicus GN=Arpin PE=1 SV=1	25.232	226	744270	1455800	4359100	5901400	908810	4282100	465130	613930	6472800	3943800	2585200	2467500	515110	568580	6782700	6110700	4468600	263850
D4A1B8	D4A1B8		Dctn3	>tr|D4A1B8|D4A1B8_RAT Protein Dctn3 OS=Rattus norvegicus GN=Dctn3 PE=4 SV=1	21.112	186	4740700	6149300	26999000	29105000	14522000	19234000	2542200	3351200	10485000	27085000	10023000	10852000	3548500	3470000	14898000	16049000	30462000	1195600
D4A1C1	D4A1C1		Rabl3	>tr|D4A1C1|D4A1C1_RAT Protein Rabl3 OS=Rattus norvegicus GN=Rabl3 PE=4 SV=1	26.293	236	397720	786790	2996200	3713000	1429700	3773600	357460	514450	2846700	5663500	2672500	2743900	526840	377400	1815500	4245700	2761000	128990
D4A1D2	D4A1D2		Arhgef26	>tr|D4A1D2|D4A1D2_RAT Protein Arhgef26 OS=Rattus norvegicus GN=Arhgef26 PE=4 SV=2	85.389	764	0	0	135850	100570	131350	72110	0	0	196330	0	77288	0	0	0	209230	153280	0	0
D4A1D4	D4A1D4		Nudt14	>tr|D4A1D4|D4A1D4_RAT Nudix (Nucleoside diphosphate linked moiety X)-type motif 14 (Predicted) OS=Rattus norvegicus GN=Nudt14 PE=4 SV=1	24.431	222	796520	2685200	18219000	18151000	3055800	16632000	2223800	2871600	18403000	28740000	12322000	18006000	1547300	2110200	24187000	23805000	14274000	204590
D4A1D8	D4A1D8		Surf4	>tr|D4A1D8|D4A1D8_RAT Protein Surf4 OS=Rattus norvegicus GN=Surf4 PE=4 SV=1	30.381	269	1145400	1995200	38044000	40318000	6700600	26757000	952090	1856400	26523000	43044000	9500700	16491000	1512800	329800	25426000	37189000	34799000	14431000
D4A1G3	D4A1G3		Mocos	>tr|D4A1G3|D4A1G3_RAT Molybdenum cofactor sulfurase OS=Rattus norvegicus GN=Mocos PE=3 SV=1	76.477	698	87086	111520	2290700	2192000	475220	899190	55561	86483	494370	4591500	649670	1237700	104100	80926	2113900	2310200	4944200	728640
D4A1H7	D4A1H7		Mul1	>tr|D4A1H7|D4A1H7_RAT Protein Mul1 OS=Rattus norvegicus GN=Mul1 PE=4 SV=1	39.78	352	0	148920	939560	1887500	0	1077200	0	91845	848870	1684100	1142500	1016700	0	74789	1733100	1368400	1531000	1735200
D4A1H9	D4A1H9		Cyp4f39	>tr|D4A1H9|D4A1H9_RAT Protein Cyp4f39 OS=Rattus norvegicus GN=Cyp4f39 PE=3 SV=2	63.706	550	99286	0	467150	452860	1553200	585240	31995	0	0	242900	0	0	0	0	0	0	567710	922370
D4A1J4	D4A1J4	3-hydroxybutyrate dehydrogenase type 2	Bdh2	>sp|D4A1J4|BDH2_RAT 3-hydroxybutyrate dehydrogenase type 2 OS=Rattus norvegicus GN=Bdh2 PE=3 SV=2	26.65	245	349250	273450	4499400	1690400	763950	975440	835810	634200	6659000	9291500	5705800	8842300	870110	738940	4992200	5003100	1756000	321730
D4A1J6	D4A1J6		Ankfy1	>tr|D4A1J6|D4A1J6_RAT Protein Ankfy1 (Fragment) OS=Rattus norvegicus GN=Ankfy1 PE=4 SV=2	128.66	1169	313960	511710	5860500	4710900	4235900	4108800	580170	462690	4338200	6368900	2872800	5845800	521320	284340	8148900	4867400	5679400	3724400
D4A1N0	D4A1N0		Rtp3	>tr|D4A1N0|D4A1N0_RAT Protein Rtp3 OS=Rattus norvegicus GN=Rtp3 PE=4 SV=1	50.196	465	385520	451530	3375900	7796100	2624600	14030000	230500	200860	2968900	5618700	1958100	5838000	111300	106450	3892800	5068900	8375500	6984300
D4A1Q9	D4A1Q9		Ttll12	>tr|D4A1Q9|D4A1Q9_RAT Protein Ttll12 OS=Rattus norvegicus GN=Ttll12 PE=4 SV=1	73.897	639	552690	705210	3313800	6630700	4000000	5948700	392570	430160	2749700	6300200	5238400	5642300	443430	265780	3463500	7421300	7380800	3836400
D4A1R8	D4A1R8		Cpne1	>tr|D4A1R8|D4A1R8_RAT Protein LOC100910990 OS=Rattus norvegicus GN=Cpne1 PE=4 SV=1	58.843	536	153210	388690	1698000	2427500	3449500	3967200	114520	230700	3671100	3427500	2842400	2594000	81686	193280	2058700	5481700	5219900	2669900
D4A1S2	D4A1S2		Prdm1	>tr|D4A1S2|D4A1S2_RAT Protein Prdm1 OS=Rattus norvegicus GN=Prdm1 PE=4 SV=1	91.937	824	0	0	0	0	0	0	0	0	0	0	0	0	0	0	1139800	0	1240400	0
D4A1T6	D4A1T6		C1r	>tr|D4A1T6|D4A1T6_RAT Protein C1r (Fragment) OS=Rattus norvegicus GN=C1r PE=3 SV=2	73.773	648	22537	93067	661760	1033400	389620	858100	126740	17908	752220	886280	215680	748250	19241	12394	623310	848440	985450	542940
D4A1T7	D4A1T7		Fam173a	>tr|D4A1T7|D4A1T7_RAT Protein Fam173a OS=Rattus norvegicus GN=Fam173a PE=4 SV=1	23.915	222	115780	179690	2557700	709500	0	1455000	214160	132190	1334500	2470600	1318000	2335800	91514	100290	819460	1006900	1476800	0
D4A1V7	D4A1V7		Mob1b	>tr|D4A1V7|D4A1V7_RAT MOB1, Mps One Binder kinase activator-like 1A (Yeast) (Predicted) OS=Rattus norvegicus GN=Mob1b PE=4 SV=1	25.091	216	759240	1584300	10534000	7961500	5277100	10105000	905910	820960	8373600	11706000	4388500	7430600	970950	1110100	11270000	14107000	7976400	447500
D4A1W8	D4A1W8		Mttp	>tr|D4A1W8|D4A1W8_RAT Microsomal triglyceride transfer protein OS=Rattus norvegicus GN=Mttp PE=4 SV=1	99.186	896	44961000	71972000	299860000	530240000	179990000	378470000	34034000	35024000	235320000	431460000	259070000	329860000	40736000	23261000	384500000	372320000	475330000	271710000
D4A1Y0	D4A1Y0		Scyl2	>tr|D4A1Y0|D4A1Y0_RAT Protein Scyl2 OS=Rattus norvegicus GN=Scyl2 PE=4 SV=1	103.36	930	0	0	1321500	821450	0	733240	40666	0	585760	971460	623520	702340	0	0	349830	515900	555270	25459
D4A224;D3ZNB8	D4A224;D3ZNB8		RGD1310016	>tr|D4A224|D4A224_RAT Protein RGD1310016 OS=Rattus norvegicus GN=RGD1310016 PE=4 SV=1;>tr|D3ZNB8|D3ZNB8_RAT Protein RGD1310016 OS=Rattus norvegicus GN=RGD1310016 PE=4 SV=1	158.65	1423	0	0	19839	37697	0	32213	0	0	185080	0	26549	0	0	0	163580	36514	0	0
D4A237	D4A237		Slc2a9	>tr|D4A237|D4A237_RAT Protein Slc2a9 OS=Rattus norvegicus GN=Slc2a9 PE=3 SV=2	59.601	545	0	0	717030	2373800	194890	1304100	0	0	580610	1324600	694450	706230	0	0	1683600	346580	914090	2667600
D4A238	D4A238		Rtp4	>tr|D4A238|D4A238_RAT Protein Rtp4 OS=Rattus norvegicus GN=Rtp4 PE=4 SV=1	27.75	245	263670	344620	6952900	5504700	500760	857350	343800	497110	8685800	8986800	1994400	3760800	376320	167030	12554000	3098100	1115700	891010
D4A249	D4A249		Mblac2	>tr|D4A249|D4A249_RAT Protein Mblac2 OS=Rattus norvegicus GN=Mblac2 PE=4 SV=1	31.189	279	74359	306620	2097100	1980100	974020	1618100	9008.6	79569	1555300	3801100	2346400	2530800	38755	113380	3018700	1807000	2862500	3037200
D4A255	D4A255		Tldc1	>tr|D4A255|D4A255_RAT Protein Tldc1 OS=Rattus norvegicus GN=Tldc1 PE=4 SV=2	46.018	414	0	0	1184500	930680	0	1410700	0	0	0	131260	705020	592270	0	0	1092200	247410	950530	1291900
D4A259	D4A259		Polr2d	>tr|D4A259|D4A259_RAT Polymerase (RNA) II (DNA directed) polypeptide D (Predicted) OS=Rattus norvegicus GN=Polr2d PE=4 SV=1	16.311	142	0	0	474000	560000	1250000	257260	0	0	218880	1270900	1013600	1335600	0	0	218150	477700	1733800	0
D4A264	D4A264		Zadh2	>tr|D4A264|D4A264_RAT Protein Zadh2 OS=Rattus norvegicus GN=Zadh2 PE=4 SV=2	40.535	377	10542000	17460000	95388000	122070000	55467000	90384000	15448000	21159000	127470000	167230000	109540000	147230000	12762000	13393000	163620000	111320000	89194000	136180000
D4A266	D4A266		Tmem208	>tr|D4A266|D4A266_RAT Protein Tmem208 OS=Rattus norvegicus GN=Tmem208 PE=4 SV=1	19.514	173	0	0	15212000	10823000	0	9840700	0	0	7518300	15288000	5322200	6964600	377560	0	13302000	15615000	4337600	0
D4A2B0	D4A2B0		Poldip3	>tr|D4A2B0|D4A2B0_RAT Polymerase (DNA-directed), delta interacting protein 3 (Predicted), isoform CRA_a OS=Rattus norvegicus GN=Poldip3 PE=4 SV=1	46.321	420	0	0	0	406350	217870	269830	0	0	20356	867460	16599	0	0	0	0	272970	82056	0
D4A2C6	D4A2C6		Lsm4	>tr|D4A2C6|D4A2C6_RAT LSM4 homolog, U6 small nuclear RNA associated (S. cerevisiae) (Predicted), isoform CRA_a OS=Rattus norvegicus GN=Lsm4 PE=4 SV=1	15.204	138	41676	361250	3716700	9287500	4041100	8588300	304870	374080	6357400	11852000	3037200	3427000	317030	347370	0	7918500	4057200	343750
D4A2D7	D4A2D7		Ipo4	>tr|D4A2D7|D4A2D7_RAT Importin 4 (Predicted), isoform CRA_b OS=Rattus norvegicus GN=Ipo4 PE=4 SV=2	118.93	1081	487670	1334000	7005000	6107300	2821900	4430300	573990	822470	7285300	1948800	3942900	4565200	871580	1183700	8327500	7436000	10718000	4781400
D4A2D8	D4A2D8		Lsm7	>tr|D4A2D8|D4A2D8_RAT LSM7 homolog, U6 small nuclear RNA associated (S. cerevisiae) (Predicted), isoform CRA_d OS=Rattus norvegicus GN=Lsm7 PE=4 SV=1	11.618	103	0	0	5252500	15032000	5323700	4519300	0	0	1295700	14247000	2289200	790470	0	0	6241200	6446400	2441600	0
D4A2F6	D4A2F6		Nhlrc3	>tr|D4A2F6|D4A2F6_RAT Protein Nhlrc3 OS=Rattus norvegicus GN=Nhlrc3 PE=4 SV=1	38.249	347	360060	414560	1267400	1231000	234250	2383300	370720	465160	1266800	1493500	1373800	991560	195030	345250	0	0	1614200	5609700
D4A2G9	D4A2G9		Ranbp1	>tr|D4A2G9|D4A2G9_RAT Protein Ranbp1 OS=Rattus norvegicus GN=Ranbp1 PE=4 SV=1	23.596	203	8176100	13163000	84900000	47170000	44438000	43832000	5745000	5823400	40605000	78367000	32713000	41188000	6286100	6381900	57124000	29930000	40964000	50162000
D4A2H2	D4A2H2		Sptlc1	>tr|D4A2H2|D4A2H2_RAT Protein Sptlc1 OS=Rattus norvegicus GN=Sptlc1 PE=4 SV=1	52.548	473	0	0	0	0	607800	0	0	0	0	0	597840	0	0	0	0	0	0	955370
D4A2H8	D4A2H8		Nudt12	>tr|D4A2H8|D4A2H8_RAT Nudix (Nucleoside diphosphate linked moiety X)-type motif 12 (Predicted) OS=Rattus norvegicus GN=Nudt12 PE=4 SV=2	51.361	462	85877	0	841160	1011900	2003400	1210700	0	20587	0	1294600	0	875530	0	103820	0	984580	517680	1133100
D4A2I3	D4A2I3		Tmem63a	>tr|D4A2I3|D4A2I3_RAT Protein Tmem63a OS=Rattus norvegicus GN=Tmem63a PE=4 SV=1	91.686	804	0	0	0	66150	7928.4	0	0	0	0	0	56930	0	0	0	31550	0	149700	31056
D4A2I4;E9PSZ0	D4A2I4		Ormdl2	>tr|D4A2I4|D4A2I4_RAT ORM1-like 2 (S. cerevisiae) (Predicted), isoform CRA_a OS=Rattus norvegicus GN=Ormdl2 PE=4 SV=1	17.361	153	2474500	4033400	17536000	21855000	17532000	9365800	2842900	3749800	2015200	20674000	5400600	7280100	1507100	2075500	25786000	20126000	20771000	1775400
D4A2K1	D4A2K1		Hoga1	>tr|D4A2K1|D4A2K1_RAT Protein Hoga1 OS=Rattus norvegicus GN=Hoga1 PE=3 SV=1	34.464	321	179120000	218080000	1240300000	1084600000	540560000	1113800000	177100000	328070000	1226000000	1734100000	1187400000	1161600000	123980000	131570000	1168600000	987280000	1480300000	820320000
D4A2N1	D4A2N1	Arginyl-tRNA--protein transferase 1	Ate1	>tr|D4A2N1|D4A2N1_RAT Arginyl-tRNA--protein transferase 1 OS=Rattus norvegicus GN=Ate1 PE=3 SV=1	58.216	509	29081	0	0	0	0	1628100	57681	71834	375950	197980	81778	0	8441.7	19091	549440	405370	234090	0
D4A2P1;D3ZG47	D4A2P1;D3ZG47		Ccar1;LOC100911233	>tr|D4A2P1|D4A2P1_RAT Protein Ccar1 OS=Rattus norvegicus GN=Ccar1 PE=4 SV=2;>tr|D3ZG47|D3ZG47_RAT Protein LOC100911233 OS=Rattus norvegicus GN=LOC100911233 PE=4 SV=2	132.15	1148	102740	304110	1816300	1011100	253200	0	125990	137400	550460	466520	276680	435820	162710	90534	1358300	165970	223570	289550
D4A2Q7	D4A2Q7		Commd4	>tr|D4A2Q7|D4A2Q7_RAT COMM domain containing 4 (Predicted), isoform CRA_b OS=Rattus norvegicus GN=Commd4 PE=4 SV=1	19.485	177	0	450280	0	2834800	2211000	5414400	119340	143020	1247500	3280800	645630	1623100	0	212520	2058900	1288500	3644400	0
D4A2W9;D3Z898	D4A2W9;D3Z898		Samhd1	>tr|D4A2W9|D4A2W9_RAT Protein Samhd1 OS=Rattus norvegicus GN=Samhd1 PE=4 SV=2;>tr|D3Z898|D3Z898_RAT Protein Samhd1 OS=Rattus norvegicus GN=Samhd1 PE=4 SV=2	69.793	607	103320	141110	994970	1581100	215640	201680	124160	96622	842510	1401800	757640	581640	53894	97153	1459400	728450	511780	878450
D4A2Y9	D4A2Y9		Pex13	>tr|D4A2Y9|D4A2Y9_RAT Peroxisomal biogenesis factor 13 (Predicted) OS=Rattus norvegicus GN=Pex13 PE=4 SV=1	44.263	403	0	0	5037400	2650500	1603800	1559400	0	0	411120	4107100	1970500	2406300	0	0	3641500	2057800	3953200	3604200
D4A2Z6	D4A2Z6		Sec63	>tr|D4A2Z6|D4A2Z6_RAT Protein Sec63 OS=Rattus norvegicus GN=Sec63 PE=4 SV=1	83.591	727	910140	2919200	13600000	17947000	8110700	11796000	1916900	1545000	4822200	9109100	7207300	4926400	1476400	1217500	9799500	10509000	11697000	7509300
D4A2Z8	D4A2Z8		Dhx36	>tr|D4A2Z8|D4A2Z8_RAT DEAH (Asp-Glu-Ala-His) box polypeptide 36 (Predicted), isoform CRA_a OS=Rattus norvegicus GN=Dhx36 PE=4 SV=1	113.84	1000	58927	69808	509510	1605000	755520	1387000	73860	67516	318670	1343600	931530	1328000	44129	14098	1027200	784490	2416900	777070
D4A305	D4A305		Ccdc58	>tr|D4A305|D4A305_RAT Coiled-coil domain containing 58 (Predicted), isoform CRA_c OS=Rattus norvegicus GN=Ccdc58 PE=1 SV=1	16.69	144	17193000	26491000	113870000	157720000	90194000	100250000	17225000	28794000	89233000	217870000	53491000	82846000	18025000	18724000	73407000	115380000	97049000	26357000
D4A386	D4A386		Cldn2	>tr|D4A386|D4A386_RAT Claudin OS=Rattus norvegicus GN=Cldn2 PE=3 SV=1	24.497	230	0	0	490230	760750	48246	202320	0	0	424450	0	242040	88398	0	0	250370	0	0	71273
D4A3E1	D4A3E1		Hnrpll	>tr|D4A3E1|D4A3E1_RAT Protein Hnrnpll OS=Rattus norvegicus GN=Hnrnpll PE=4 SV=1	64.362	591	221710	318360	1938800	442460	947930	2638100	640940	411130	2971100	3332900	1027900	1157800	159190	234740	5675500	1680100	319150	0
D4A3E2	D4A3E2		Npepl1	>tr|D4A3E2|D4A3E2_RAT Aminopeptidase-like 1 (Predicted) OS=Rattus norvegicus GN=Npepl1 PE=4 SV=2	43.682	412	10553000	11711000	40128000	53414000	46683000	43088000	11679000	11376000	58497000	63138000	50920000	43361000	6667100	6661900	40573000	31289000	58858000	47113000
D4A3E3	D4A3E3		Arid1a	>tr|D4A3E3|D4A3E3_RAT AT rich interactive domain 1A (Swi1 like) (Predicted) OS=Rattus norvegicus GN=Arid1a PE=4 SV=2	207.49	1911	0	0	197300	90979	0	208660	0	0	244200	229880	209920	0	0	0	0	302950	5203800	1131500
D4A3E8	D4A3E8		Mrps27	>tr|D4A3E8|D4A3E8_RAT Mitochondrial ribosomal protein S27 (Predicted), isoform CRA_b OS=Rattus norvegicus GN=Mrps27 PE=4 SV=1	47.648	415	1818300	3000600	9409600	13075000	5706800	15612000	2021300	3623600	5056800	13104000	7670000	10905000	2260400	2603400	11752000	11810000	24270000	8037100
D4A3I4	D4A3I4		Btf3l4	>tr|D4A3I4|D4A3I4_RAT Protein Btf3l4 OS=Rattus norvegicus GN=Btf3l4 PE=4 SV=1	17.27	158	1935100	7361900	34885000	49428000	56822000	51786000	3721000	2068600	23103000	46216000	28399000	39276000	3870900	958000	46953000	21097000	54421000	8953600
D4A3I5	D4A3I5		Fam160b1	>tr|D4A3I5|D4A3I5_RAT LOC361774 (Predicted) OS=Rattus norvegicus GN=Fam160b1 PE=4 SV=1	86.211	764	0	57821	981730	827390	332550	824200	0	0	380210	711090	245080	335370	0	0	960560	874330	863300	414210
D4A3I8	D4A3I8		Slc17a2	>tr|D4A3I8|D4A3I8_RAT Sodium-dependent phosphate transport protein 2A OS=Rattus norvegicus GN=Slc17a2 PE=4 SV=2	48.299	447	0	0	1238300	3012600	0	1751500	0	0	1569700	1554600	1510700	1695000	0	0	360150	799720	798610	308330
D4A3J1	D4A3J1		RGD1309079	>tr|D4A3J1|D4A3J1_RAT Protein RGD1309079 OS=Rattus norvegicus GN=RGD1309079 PE=4 SV=1	49.207	428	576830	669490	1077500	2647300	3240700	3361100	105470	284640	318500	1400200	2089100	730100	102690	203890	1593300	1599800	4139200	3670600
D4A3K5	D4A3K5	Histone H1.1	Hist1h1a	>sp|D4A3K5|H11_RAT Histone H1.1 OS=Rattus norvegicus GN=Hist1h1a PE=3 SV=1	22.004	214	988420	2029100	6124500	12840000	11103000	8936200	660110	1192300	1858000	4884600	0	2641800	1479900	333050	9298200	2742600	0	0
D4A3M7	D4A3M7		Bsdc1	>tr|D4A3M7|D4A3M7_RAT Protein Bsdc1 (Fragment) OS=Rattus norvegicus GN=Bsdc1 PE=4 SV=2	47.544	427	0	0	349820	0	560210	768060	0	0	0	0	0	0	0	0	0	0	0	535420
D4A3S0	D4A3S0		Trappc6a	>tr|D4A3S0|D4A3S0_RAT Protein Trappc6a OS=Rattus norvegicus GN=Trappc6a PE=4 SV=1	17.367	159	0	0	4479100	2731000	2558800	2235700	0	0	3420100	2077600	339120	1836100	0	0	1875700	1608000	3106900	0
D4A3S8	D4A3S8		Nsun2	>tr|D4A3S8|D4A3S8_RAT NOL1/NOP2/Sun domain family, member 2 (Predicted) OS=Rattus norvegicus GN=Nsun2 PE=4 SV=1	88.09	782	231290	387200	3399800	3279900	2447400	3019300	237030	100110	2183800	2263700	1389800	2288100	430130	576200	3545200	4874400	3089400	3242000
D4A3T3;M0R4Z0	D4A3T3;M0R4Z0		Cbx1	>tr|D4A3T3|D4A3T3_RAT Protein Cbx1 OS=Rattus norvegicus GN=Cbx1 PE=4 SV=1;>tr|M0R4Z0|M0R4Z0_RAT Protein Cbx1 OS=Rattus norvegicus GN=Cbx1 PE=4 SV=1	21.403	185	0	1145400	10695000	6695100	2991800	2184900	451650	839200	8062200	6141500	4072000	3336100	522660	642670	2287600	10524000	4757700	0
D4A3V0	D4A3V0		Eva1a	>tr|D4A3V0|D4A3V0_RAT Protein Eva1a OS=Rattus norvegicus GN=Eva1a PE=4 SV=1	18.026	159	565590	1989600	7403800	9822200	3403700	3716300	697130	2055900	6942100	11516000	6066500	4440300	1444000	477590	800800	8238800	6288100	295050
D4A3V2	D4A3V2	NADH dehydrogenase [ubiquinone] 1 alpha subcomplex subunit 6	Ndufa6	>tr|D4A3V2|D4A3V2_RAT NADH dehydrogenase [ubiquinone] 1 alpha subcomplex subunit 6 OS=Rattus norvegicus GN=Ndufa6 PE=3 SV=1	15.224	130	23088000	42232000	102440000	133050000	172600000	170040000	35085000	44631000	128830000	84895000	143940000	177960000	26650000	15329000	63979000	127230000	238120000	32925000
D4A3V3	D4A3V3		Parp12	>tr|D4A3V3|D4A3V3_RAT Poly (ADP-ribose) polymerase family, member 12 (Predicted), isoform CRA_b OS=Rattus norvegicus GN=Parp12 PE=4 SV=2	79.485	706	333180	541880	2513600	2732800	1504000	2414400	210580	294480	2195200	2775300	1557100	1483700	371870	364710	5257600	1861000	1657000	1264000
D4A3V6	D4A3V6		Bloc1s3	>tr|D4A3V6|D4A3V6_RAT Biogenesis of lysosome-related organelles complex 1 subunit 3 OS=Rattus norvegicus GN=Bloc1s3 PE=3 SV=1	20.3	195	0	0	491560	887530	752480	916350	0	0	848700	228180	1249700	1362700	0	0	631880	1827300	1749200	123230
D4A3X0	D4A3X0		LOC100911755	>tr|D4A3X0|D4A3X0_RAT Protein Seh1l OS=Rattus norvegicus GN=Seh1l PE=4 SV=2	261.24	2378	52733	66880	1622000	2160900	73573	1311900	84507	57079	1852800	977580	130760	101200	34720	11815	430360	483190	98205	340300
D4A3X3	D4A3X3		Isg15	>tr|D4A3X3|D4A3X3_RAT Interferon, alpha-inducible protein (Clone IFI-15K) (Predicted) OS=Rattus norvegicus GN=Isg15 PE=4 SV=1	18.225	161	234030	368910	0	0	0	0	0	0	0	0	0	0	0	416570	5336500	0	0	0
D4A3Z3	D4A3Z3		Tbc1d24	>tr|D4A3Z3|D4A3Z3_RAT Protein Tbc1d24 OS=Rattus norvegicus GN=Tbc1d24 PE=4 SV=1	62.808	556	58137	110630	482750	632340	377860	1323400	30092	111450	892560	612840	1009500	1198000	50753	151510	517580	517430	1382600	640440
D4A414	D4A414		Cox15	>tr|D4A414|D4A414_RAT COX15 homolog, cytochrome c oxidase assembly protein (Yeast), isoform CRA_a OS=Rattus norvegicus GN=Cox15 PE=3 SV=1	45.914	414	416770	226430	6626600	9996300	0	5413500	433090	555780	6048900	10121000	3260900	3857800	431370	102600	6709700	7194200	5812400	1725200
D4A415	D4A415		Fam175b	>tr|D4A415|D4A415_RAT Protein Fam175b OS=Rattus norvegicus GN=Fam175b PE=4 SV=2	47.804	423	83608	287190	6541600	5334500	2565900	5359500	0	0	1916900	4959700	2654500	5448300	98174	200330	5706500	6228400	9015800	4234900
D4A416	D4A416		Clptm1l	>tr|D4A416|D4A416_RAT Protein Clptm1l OS=Rattus norvegicus GN=Clptm1l PE=4 SV=1	62.29	539	231830	515990	1249000	2930800	682150	4922800	116580	215780	1034800	1577300	1909300	2780200	269230	126220	2013800	2782700	3403700	1889900
D4A436	D4A436	Integrin beta	Itgb5	>tr|D4A436|D4A436_RAT Integrin beta OS=Rattus norvegicus GN=Itgb5 PE=3 SV=2	87.991	799	32395	17810	382000	596940	140670	65944	46945	0	128980	222400	251670	153230	0	0	148910	235990	132840	147910
D4A442;D3ZRI8	D4A442;D3ZRI8	40S ribosomal protein S21	LOC100359505;LOC100360154	>tr|D4A442|D4A442_RAT 40S ribosomal protein S21 OS=Rattus norvegicus GN=LOC100359505 PE=3 SV=1;>tr|D3ZRI8|D3ZRI8_RAT 40S ribosomal protein S21 OS=Rattus norvegicus GN=LOC100360154 PE=3 SV=2	9.0532	83	0	0	0	0	0	0	0	0	0	0	0	0	0	0	1961200	0	0	0
D4A450	D4A450		Bclaf1	>tr|D4A450|D4A450_RAT Protein Bclaf1 OS=Rattus norvegicus GN=Bclaf1 PE=1 SV=2	184.65	1645	0	0	75719	60740	15093	0	0	0	0	0	0	0	0	0	0	0	9291.9	0
D4A465	D4A465		Lamtor2	>tr|D4A465|D4A465_RAT Protein Lamtor2 OS=Rattus norvegicus GN=Lamtor2 PE=4 SV=1	13.48	125	1412300	3266100	15382000	32960000	10052000	36219000	1441300	2274600	10088000	37479000	7288100	4939300	1053800	383210	21340000	16506000	20983000	467470
D4A471	D4A471		Cmc2	>tr|D4A471|D4A471_RAT Protein Cmc2 OS=Rattus norvegicus GN=Cmc2 PE=4 SV=1	9.4086	79	375790	469470	2550100	9498500	2277300	9422100	153360	927830	2936100	11936000	3947700	1109700	296480	272600	3769800	3142800	7817100	56832
D4A478	D4A478		Ntpcr	>tr|D4A478|D4A478_RAT Protein Ntpcr OS=Rattus norvegicus GN=Ntpcr PE=3 SV=1	20.813	192	2102600	3637500	15527000	23448000	22901000	27096000	1355900	1901800	17760000	29055000	12365000	18736000	1659600	1419500	20161000	23004000	23388000	222590
D4A4A9	D4A4A9		Mrpl19	>tr|D4A4A9|D4A4A9_RAT Protein Mrpl19 OS=Rattus norvegicus GN=Mrpl19 PE=4 SV=1	33.633	292	1237000	1168400	9897000	10938000	326400	6702700	919960	1138100	7670100	13804000	7922900	7820500	540330	415340	9795300	8267100	12370000	7901900
D4A4B1	D4A4B1		Mrpl15	>tr|D4A4B1|D4A4B1_RAT Mitochondrial ribosomal protein L15 (Predicted), isoform CRA_c OS=Rattus norvegicus GN=Mrpl15 PE=3 SV=2	23.222	205	2215800	3791300	25030000	20841000	11119000	14091000	2016600	2585900	20750000	16881000	7195200	9615000	2207800	2593000	16520000	16992000	10809000	9660900
D4A4H3;D4A4K4	D4A4H3;D4A4K4		Vps13c	>tr|D4A4H3|D4A4H3_RAT Protein Vps13c OS=Rattus norvegicus GN=Vps13c PE=4 SV=2;>tr|D4A4K4|D4A4K4_RAT Protein Vps13c OS=Rattus norvegicus GN=Vps13c PE=4 SV=2	414.09	3701	79797	124220	1961100	2864700	285570	2039200	87363	68991	2409000	2993500	1366500	1362700	162720	82137	2292700	3397700	3033700	1502200
D4A4H5	D4A4H5		Sdf2	>tr|D4A4H5|D4A4H5_RAT Protein Sdf2 OS=Rattus norvegicus GN=Sdf2 PE=4 SV=2	24.056	219	2431600	3804000	22065000	21979000	7388300	13925000	2410300	2639400	14248000	31038000	11670000	15829000	2447800	1630300	23554000	23976000	18641000	0
D4A4L5	D4A4L5		Isca2	>tr|D4A4L5|D4A4L5_RAT Protein Isca2 OS=Rattus norvegicus GN=Isca2 PE=4 SV=1	16.68	154	4701900	7082700	26819000	37287000	32027000	21597000	4971100	5415800	15704000	58065000	19617000	22502000	5903600	2023100	24977000	28526000	23108000	4620500
D4A4N1	D4A4N1		Mzt1	>tr|D4A4N1|D4A4N1_RAT Protein Mzt1 OS=Rattus norvegicus GN=Mzt1 PE=4 SV=2	7.5326	72	76357	187720	1330500	2210500	555900	0	0	0	1510800	0	0	101140	114820	0	1433700	802710	0	0
D4A4N9	D4A4N9		LOC685849	>tr|D4A4N9|D4A4N9_RAT Protein LOC685849 OS=Rattus norvegicus GN=LOC685849 PE=4 SV=2	25.874	234	0	0	0	0	0	0	0	0	0	0	0	0	0	0	0	0	0	0
D4A4P3;M0RA24	D4A4P3;M0RA24		LOC100361144;LOC100362391	>tr|D4A4P3|D4A4P3_RAT Protein LOC100361144 OS=Rattus norvegicus GN=LOC100361144 PE=4 SV=1;>tr|M0RA24|M0RA24_RAT Protein LOC100362391 OS=Rattus norvegicus GN=LOC100362391 PE=4 SV=1	11.267	99	15913000	22923000	85587000	217900000	40045000	69407000	14287000	28062000	105350000	213650000	62080000	59290000	11297000	8728400	130830000	93710000	66274000	13087000
D4A4P4	D4A4P4		Flad1	>tr|D4A4P4|D4A4P4_RAT Protein Flad1 OS=Rattus norvegicus GN=Flad1 PE=4 SV=2	54.604	490	2263900	1440600	16801000	22137000	7244100	20512000	2768700	1836600	17120000	25778000	14458000	14347000	1637300	1502800	23001000	21206000	19412000	26741000
D4A4Q3	D4A4Q3		Ypel5	>tr|D4A4Q3|D4A4Q3_RAT Protein yippee-like OS=Rattus norvegicus GN=Ypel5 PE=3 SV=1	13.841	121	0	0	1679200	4344000	3319600	1862000	0	0	1193000	2861800	1709000	1959100	0	0	850770	1881100	3205400	236280
D4A4Q4	D4A4Q4		Ociad2	>tr|D4A4Q4|D4A4Q4_RAT Protein Ociad2 OS=Rattus norvegicus GN=Ociad2 PE=4 SV=2	14.205	128	455370	910200	9126100	8513100	6954100	6609300	866530	1168300	4118300	11241000	5079400	9400800	997630	245000	6292200	3749500	14771000	308490
D4A4R1	D4A4R1		LOC100362920	>tr|D4A4R1|D4A4R1_RAT Protein Eml3 OS=Rattus norvegicus GN=Eml3 PE=4 SV=1	95.726	897	0	0	65555	59014	1317.9	8780	0	0	18850	81413	21964	7645.3	0	0	17272	100100	86165	16101
D4A4R3	D4A4R3		Fam22f	>tr|D4A4R3|D4A4R3_RAT Protein Nutm2f OS=Rattus norvegicus GN=Nutm2f PE=4 SV=1	80.236	735	0	0	0	0	0	0	0	0	0	0	0	0	0	0	204410	225480	0	0
D4A4T6;D4A705	D4A4T6;D4A705		Rint1	>tr|D4A4T6|D4A4T6_RAT Protein Rint1 OS=Rattus norvegicus GN=Rint1 PE=4 SV=2;>tr|D4A705|D4A705_RAT Protein Rint1 OS=Rattus norvegicus GN=Rint1 PE=4 SV=2	81.187	713	54179	91929	143180	834820	110640	297410	65315	0	477510	762210	405100	401930	55819	49432	835980	533070	1442500	349020
D4A4T9	D4A4T9	Cysteine and histidine-rich domain-containing protein 1	Chordc1	>sp|D4A4T9|CHRD1_RAT Cysteine and histidine-rich domain-containing protein 1 OS=Rattus norvegicus GN=Chordc1 PE=3 SV=1	37.361	331	2295600	2933400	19363000	23865000	8616400	30607000	1481400	1763900	8810600	20853000	12835000	13332000	2721200	1462600	25919000	21211000	21861000	26533000
D4A4U3	D4A4U3		Mdp1	>tr|D4A4U3|D4A4U3_RAT Protein Mdp1 OS=Rattus norvegicus GN=Mdp1 PE=4 SV=1	18.61	164	3147900	5305600	33982000	46358000	36940000	39151000	1653100	3544400	32350000	58375000	23607000	30234000	2395800	2177000	22349000	41346000	33592000	1801900
D4A4V1	D4A4V1		Mrps18c	>tr|D4A4V1|D4A4V1_RAT Mitochondrial ribosomal protein S18C (Predicted), isoform CRA_a OS=Rattus norvegicus GN=Mrps18c PE=3 SV=1	16.371	143	0	0	642320	561430	1231700	2221300	0	0	0	556590	0	705160	0	0	0	532370	0	0
D4A4W6	D4A4W6		Slirp	>tr|D4A4W6|D4A4W6_RAT Protein Slirp OS=Rattus norvegicus GN=Slirp PE=4 SV=1	12.576	111	9066300	16753000	37363000	92833000	50175000	59599000	4518000	17278000	42094000	111070000	48909000	52610000	7368800	7399900	65890000	70522000	72575000	69568000
D4A4X4;F1M434	D4A4X4;F1M434		Cgn	>tr|D4A4X4|D4A4X4_RAT Protein Cgn OS=Rattus norvegicus GN=Cgn PE=4 SV=1;>tr|F1M434|F1M434_RAT Protein Cgn OS=Rattus norvegicus GN=Cgn PE=4 SV=2	136.4	1193	523270	874790	5582000	4565900	2979200	3357300	482110	568360	2794800	3853900	1740900	2512200	617960	321500	5091700	1554600	2444300	1451100
D4A4X7	D4A4X7		Mospd2	>tr|D4A4X7|D4A4X7_RAT Protein Mospd2 OS=Rattus norvegicus GN=Mospd2 PE=4 SV=1	54.966	479	1526800	2583900	7575900	5838900	4096100	6253800	796830	1312900	5049300	8192300	3708800	4241600	1021900	1134000	6329400	6889800	6366400	7840700
D4A4Y0	D4A4Y0		Exosc4	>tr|D4A4Y0|D4A4Y0_RAT Protein Exosc4 OS=Rattus norvegicus GN=Exosc4 PE=4 SV=1	26.391	245	734940	1611900	1407400	4421700	3345200	1151800	1015100	1513700	1559400	4221400	3369700	5507000	1038100	683680	0	1994700	838880	0
D4A500	D4A500		Hddc3	>tr|D4A500|D4A500_RAT HD domain containing 3 (Predicted), isoform CRA_b OS=Rattus norvegicus GN=Hddc3 PE=4 SV=1	20.254	179	1467700	1296400	9353200	9201300	6054400	10070000	4063200	2453600	7280700	18369000	11365000	14144000	3927100	1301600	8200000	11995000	15524000	2444300
D4A510;D3ZPF5	D4A510;D3ZPF5		Smarcc2	>tr|D4A510|D4A510_RAT Protein Smarcc2 OS=Rattus norvegicus GN=Smarcc2 PE=4 SV=2;>tr|D3ZPF5|D3ZPF5_RAT Protein Smarcc2 OS=Rattus norvegicus GN=Smarcc2 PE=4 SV=1	124.28	1130	14185	18546	826810	1005400	1503500	1337300	0	67216	168660	2050500	836640	1736600	0	6740.9	934780	2350600	1476900	237920
D4A511	D4A511	Signal recognition particle 9 kDa protein	Srp9	>tr|D4A511|D4A511_RAT Signal recognition particle 9 kDa protein OS=Rattus norvegicus GN=Srp9 PE=3 SV=1	10.137	86	1510500	3351400	4388400	15111000	12931000	13684000	1181300	1690600	6521300	13579000	4974500	9784400	1164700	1881400	10156000	6175200	20403000	1297300
D4A512	D4A512		Nemf	>tr|D4A512|D4A512_RAT Protein Nemf OS=Rattus norvegicus GN=Nemf PE=4 SV=2	93.444	814	86423	219990	0	432920	0	0	50191	28922	0	275570	0	0	41373	37738	0	74616	294210	0
D4A526	D4A526		Lect2	>tr|D4A526|D4A526_RAT Leukocyte cell-derived chemotaxin 2 (Predicted) OS=Rattus norvegicus GN=Lect2 PE=4 SV=2	16.598	151	0	265300	1060500	3523400	614270	0	0	234690	0	1593400	517840	1098000	108480	132090	1469600	1077100	1654100	0
D4A531	D4A531	DNA-directed RNA polymerase subunit	Polr2i	>tr|D4A531|D4A531_RAT DNA-directed RNA polymerase subunit OS=Rattus norvegicus GN=Polr2i PE=3 SV=1	14.523	125	337570	177340	4993000	7382200	5476200	10880000	340260	580630	3884800	5408000	3194800	5741900	764580	520170	13000000	10846000	9368700	1314800
D4A533	D4A533		Tapt1	>tr|D4A533|D4A533_RAT Protein Tapt1 (Fragment) OS=Rattus norvegicus GN=Tapt1 PE=4 SV=2	52.268	457	36548	335360	3956600	14152000	39151	3131000	158480	2242200	12723000	18478000	1550800	2811400	70905	221120	4190600	4410700	1555900	920270
D4A560	D4A560		Vamp4	>tr|D4A560|D4A560_RAT Protein Vamp4 OS=Rattus norvegicus GN=Vamp4 PE=4 SV=1	16.358	141	182150	341960	1663900	2834400	1282200	2683800	193770	313080	1789900	2356500	993880	1663600	537690	288090	3155000	622780	1383600	0
D4A565	D4A565		Ndufb5	>tr|D4A565|D4A565_RAT NADH dehydrogenase (Ubiquinone) 1 beta subcomplex, 5 (Predicted), isoform CRA_b OS=Rattus norvegicus GN=Ndufb5 PE=4 SV=1	21.664	189	16802000	30749000	99817000	132380000	161030000	127880000	25454000	34595000	121580000	257310000	134240000	189400000	23110000	10924000	174030000	160760000	160710000	24491000
D4A567	D4A567		Bub3	>tr|D4A567|D4A567_RAT Uncharacterized protein OS=Rattus norvegicus PE=4 SV=2	67.703	627	2242700	2776800	10798000	14144000	4231000	10694000	2231400	2336000	8883000	8297700	5637100	10684000	1707700	1588100	12767000	10783000	8699300	10142000
D4A573	D4A573		Smim15	>tr|D4A573|D4A573_RAT Protein Smim15 OS=Rattus norvegicus GN=Smim15 PE=4 SV=1	8.5771	74	0	0	444320	0	0	4364000	0	0	0	2642300	909210	0	0	0	599170	0	2955500	0
D4A5A2;G3V9A4;F1M4C0;F7EEP6;Q05961;Q5MYX1	D4A5A2;G3V9A4;F1M4C0;F7EEP6;Q05961	2-5-oligoadenylate synthase 1A	Oas1a	>tr|D4A5A2|D4A5A2_RAT 2-5-oligoadenylate synthase 1A (Fragment) OS=Rattus norvegicus GN=Oas1a PE=4 SV=2;>tr|G3V9A4|G3V9A4_RAT 2-5-oligoadenylate synthase 1A OS=Rattus norvegicus GN=Oas1a PE=4 SV=1;>tr|F1M4C0|F1M4C0_RAT 2-5-oligoadenylate synthase 1A	35.212	298	260610	501680	3525700	1501700	0	0	287070	635540	6015200	1436400	1984100	794120	310910	395460	15081000	362740	2614600	741030
D4A5I9;D3ZYX5	D4A5I9;D3ZYX5		Myo6	>tr|D4A5I9|D4A5I9_RAT Protein Myo6 OS=Rattus norvegicus GN=Myo6 PE=4 SV=2;>tr|D3ZYX5|D3ZYX5_RAT Protein Myo6 OS=Rattus norvegicus GN=Myo6 PE=4 SV=2	145.53	1261	82588	139480	1138800	2110700	879440	548360	111920	136540	725070	2121700	363540	489910	91798	51353	2273100	939440	1441300	708850
D4A5J1	D4A5J1		Kbtbd11	>tr|D4A5J1|D4A5J1_RAT Protein Kbtbd11 OS=Rattus norvegicus GN=Kbtbd11 PE=4 SV=1	67.848	633	0	0	291860	157880	469380	250010	0	0	78147	0	0	137470	0	0	91600	153520	173460	195350
D4A5K6	D4A5K6		Zmpste24	>tr|D4A5K6|D4A5K6_RAT Protein Zmpste24 OS=Rattus norvegicus GN=Zmpste24 PE=4 SV=1	54.847	475	719930	754810	6250400	7370500	1233600	6227000	509130	568120	2982400	5966500	2778400	4233600	298810	98001	6049400	3896400	5887700	2671200
D4A5M3	D4A5M3		Ntan1	>tr|D4A5M3|D4A5M3_RAT Protein Ntan1 OS=Rattus norvegicus GN=Ntan1 PE=4 SV=2	33.969	309	133410	158060	0	0	794510	0	151080	289330	0	0	0	0	299230	121040	0	0	0	0
D4A5Q1	D4A5Q1		Pik3cd	>tr|D4A5Q1|D4A5Q1_RAT Phosphatidylinositol 3-kinase catalytic delta polypeptide (Predicted) OS=Rattus norvegicus GN=Pik3cd PE=4 SV=2	107.9	944	0	0	0	0	195470	0	11389	0	0	0	0	0	0	110100	0	0	0	0
D4A5Q9;D3ZJJ9	D4A5Q9		Gldc	>tr|D4A5Q9|D4A5Q9_RAT Glycine decarboxylase (Predicted), isoform CRA_a OS=Rattus norvegicus GN=Gldc PE=4 SV=1	98.547	884	10003000	18838000	82794000	180060000	94617000	113020000	21939000	13283000	159880000	190690000	135200000	146990000	17157000	7341200	145700000	106190000	212750000	87846000
D4A5R0;D3ZUZ9	D4A5R0;D3ZUZ9	Peptidyl-prolyl cis-trans isomerase	Ppih	>tr|D4A5R0|D4A5R0_RAT Peptidyl-prolyl cis-trans isomerase OS=Rattus norvegicus GN=Ppih PE=3 SV=2;>tr|D3ZUZ9|D3ZUZ9_RAT Peptidyl-prolyl cis-trans isomerase OS=Rattus norvegicus GN=Ppih PE=3 SV=2	19.093	176	282120	1151800	6708000	7621200	9108100	1718700	538890	806850	4631300	6593000	621280	4612600	265360	537490	0	7298600	1890400	286030
D4A5S9	D4A5S9		Prpf39	>tr|D4A5S9|D4A5S9_RAT Protein Prpf39 OS=Rattus norvegicus GN=Prpf39 PE=4 SV=1	77.937	664	0	29173	0	0	0	347760	12531	31671	385000	170110	164930	356180	16725	34417	248380	423200	441370	171850
D4A5T1	D4A5T1		Sf3b5	>tr|D4A5T1|D4A5T1_RAT Protein Sf3b5 OS=Rattus norvegicus GN=Sf3b5 PE=4 SV=1	10.119	86	1264200	2060400	8163700	27040000	25721000	16534000	1082800	2295100	6696400	21139000	8492400	14462000	1053400	1004900	14459000	12359000	10843000	5209000
D4A5T8	D4A5T8		Ppl	>tr|D4A5T8|D4A5T8_RAT Periplakin (Predicted) OS=Rattus norvegicus GN=Ppl PE=1 SV=1	204.14	1754	0	0	0	0	0	27456	0	0	78883	0	0	0	0	46921	0	70496	0	0
D4A5U3	D4A5U3	Protein-glutamine gamma-glutamyltransferase E;Protein-glutamine gamma-glutamyltransferase E 50 kDa catalytic chain;Protein-glutamine gamma-glutamyltransferase E 27 kDa non-catalytic chain	Tgm3	>sp|D4A5U3|TGM3_RAT Protein-glutamine gamma-glutamyltransferase E OS=Rattus norvegicus GN=Tgm3 PE=3 SV=1	77.229	693	77460	124760	4067700	2275800	0	2255000	1638300	47013	3939600	1235200	922710	0	55315	14329	1341900	1400300	2201700	0
D4A5X8	D4A5X8		Ahcyl1	>tr|D4A5X8|D4A5X8_RAT Protein Ahcyl1 OS=Rattus norvegicus GN=Ahcyl1 PE=3 SV=1	52.895	475	817260	2461300	5893900	9739000	3915400	15917000	500460	1610400	6164300	9573000	14741000	3288600	1259100	1086800	10415000	7383200	13161000	11539000
D4A604	D4A604		Pigt	>tr|D4A604|D4A604_RAT Phosphatidylinositol glycan, class T (Predicted), isoform CRA_b OS=Rattus norvegicus GN=Pigt PE=4 SV=1	65.55	580	32393	0	902340	660710	0	422850	53229	0	355720	713480	0	364100	61262	0	592670	0	269330	0
D4A605	D4A605		Nnmt	>tr|D4A605|D4A605_RAT Nicotinamide N-methyltransferase (Predicted) OS=Rattus norvegicus GN=Nnmt PE=4 SV=1	29.515	264	2385000	10890000	55942000	43528000	10141000	33984000	9459100	5176500	21942000	21715000	10569000	8524600	8035500	5843500	24276000	6809800	15052000	99530
D4A629	D4A629		Pcmtd1	>tr|D4A629|D4A629_RAT Protein Pcmtd1 OS=Rattus norvegicus GN=Pcmtd1 PE=4 SV=1	40.653	357	0	0	1393100	155700	0	1184900	0	0	928120	2440600	536600	921090	0	0	1822600	837890	473740	1679300
D4A631	D4A631	Brefeldin A-inhibited guanine nucleotide-exchange protein 1	Arfgef1	>sp|D4A631|BIG1_RAT Brefeldin A-inhibited guanine nucleotide-exchange protein 1 OS=Rattus norvegicus GN=Arfgef1 PE=1 SV=1	207.89	1846	21990	33082	419030	105290	127850	95506	11541	35966	285600	88897	125240	313320	30507	26802	181460	392380	178130	31017
D4A648;O54748;B1WBQ5	D4A648;O54748;B1WBQ5	Serine/threonine-protein kinase 3;Serine/threonine-protein kinase 3 36kDa subunit;Serine/threonine-protein kinase 3 20kDa subunit	Stk4;Stk3	>tr|D4A648|D4A648_RAT Protein Stk4 OS=Rattus norvegicus GN=Stk4 PE=4 SV=1;>sp|O54748|STK3_RAT Serine/threonine-protein kinase 3 OS=Rattus norvegicus GN=Stk3 PE=1 SV=1;>tr|B1WBQ5|B1WBQ5_RAT Serine/threonine kinase 3 (STE20 homolog, yeast) OS=Rattus norvegic	55.37	487	0	0	0	1299100	351870	0	0	0	0	473250	0	0	0	0	0	610210	194890	0
D4A678;F7FC39	D4A678;F7FC39		Spta1	>tr|D4A678|D4A678_RAT Protein Spta1 OS=Rattus norvegicus GN=Spta1 PE=1 SV=2;>tr|F7FC39|F7FC39_RAT Protein Spta1 OS=Rattus norvegicus GN=Spta1 PE=1 SV=1	280.09	2416	439770	658990	4487000	5929200	1265900	12741000	1008800	507860	1435700	8110200	5216000	7127300	584330	196980	4465400	5217900	7337100	1446700
D4A6C5	D4A6C5		Arhgap1	>tr|D4A6C5|D4A6C5_RAT Protein Arhgap1 OS=Rattus norvegicus GN=Arhgap1 PE=4 SV=1	50.622	439	946600	401770	8312800	10599000	4945000	9510000	1253700	544490	9036100	13455000	5892600	6521400	111850	506350	11505000	13257000	8615100	8971700
D4A6D7;D4A6D7-2	D4A6D7;D4A6D7-2	Tetratricopeptide repeat protein 19, mitochondrial	Ttc19	>sp|D4A6D7|TTC19_RAT Tetratricopeptide repeat protein 19, mitochondrial OS=Rattus norvegicus GN=Ttc19 PE=3 SV=1;>sp|D4A6D7-2|TTC19_RAT Isoform 2 of Tetratricopeptide repeat protein 19, mitochondrial OS=Rattus norvegicus GN=Ttc19	41.333	365	439490	132940	763900	803880	0	1137600	507470	277010	1229200	2517300	1379600	1730500	238850	206630	2251600	2999800	2064400	2303000
D4A6G2	D4A6G2		Sema4g	>tr|D4A6G2|D4A6G2_RAT Protein Sema4g OS=Rattus norvegicus GN=Sema4g PE=4 SV=1	92.213	837	71041	67860	635600	448950	1580700	1247200	69164	99928	1392900	2491000	1939400	2315400	64251	31636	1304000	593360	1476400	705540
D4A6L1	D4A6L1		Tapbpl	>tr|D4A6L1|D4A6L1_RAT Protein Tapbpl OS=Rattus norvegicus GN=Tapbpl PE=4 SV=1	48.27	446	0	162980	444980	695200	0	1374900	0	79220	0	883110	1063200	457530	69347	65851	1211200	0	421940	0
D4A6R4	D4A6R4		LOC100362216	>tr|D4A6R4|D4A6R4_RAT Protein LOC100362216 OS=Rattus norvegicus GN=LOC100362216 PE=4 SV=1	30.458	287	2542400	4276700	14376000	21714000	16375000	24133000	809220	2834000	10125000	18415000	14046000	13029000	759330	1171600	21528000	11116000	20832000	24451000
D4A6T5	D4A6T5		Cutc	>tr|D4A6T5|D4A6T5_RAT CutC copper transporter homolog (E.coli) (Predicted) OS=Rattus norvegicus GN=Cutc PE=3 SV=2	28.375	266	0	0	645090	520410	0	1560800	0	0	878240	3372300	1747800	2028800	0	0	833920	2480800	0	1921800
D4A6U0;Q5M868;Q5M868-2	D4A6U0;Q5M868;Q5M868-2	Non-lysosomal glucosylceramidase	Gba2	>tr|D4A6U0|D4A6U0_RAT Non-lysosomal glucosylceramidase OS=Rattus norvegicus GN=Gba2 PE=3 SV=1;>sp|Q5M868|GBA2_RAT Non-lysosomal glucosylceramidase OS=Rattus norvegicus GN=Gba2 PE=2 SV=2;>sp|Q5M868-2|GBA2_RAT Isoform 2 of Non-lysosomal glucosylceramidase OS	101.82	904	0	0	90617	0	73280	56702	111680	0	0	889040	79387	79798	0	68828	0	0	85726	0
D4A6X1	D4A6X1		Dysf	>tr|D4A6X1|D4A6X1_RAT Dysferlin (Predicted), isoform CRA_a OS=Rattus norvegicus GN=Dysf PE=4 SV=2	230.97	2029	35166	21884	948500	1520800	54004	309400	25073	29966	769540	1037200	526690	367520	42388	12321	466280	415580	918080	260000
D4A6X4	D4A6X4	Acylphosphatase	Acyp1	>tr|D4A6X4|D4A6X4_RAT Acylphosphatase OS=Rattus norvegicus GN=Acyp1 PE=3 SV=1	11.312	99	1850400	3349400	20628000	25706000	16452000	28987000	3362000	2322800	13904000	34040000	7757900	7338000	1570000	1346800	17615000	10308000	16850000	286440
D4A6X7	D4A6X7		Ppcs	>tr|D4A6X7|D4A6X7_RAT Protein Ppcs OS=Rattus norvegicus GN=Ppcs PE=4 SV=1	33.908	311	10849000	10877000	112610000	57593000	26191000	57130000	8944200	8245400	60652000	86607000	29751000	65779000	3534300	5904100	68753000	48625000	54022000	60059000
D4A712;D3ZC46	D4A712;D3ZC46		Tcf25	>tr|D4A712|D4A712_RAT Protein Tcf25 OS=Rattus norvegicus GN=Tcf25 PE=4 SV=2;>tr|D3ZC46|D3ZC46_RAT Protein Tcf25 OS=Rattus norvegicus GN=Tcf25 PE=4 SV=1	68.219	600	0	0	211740	919140	478810	710510	0	0	185370	363140	420010	473810	0	0	1139100	775120	353470	751780
D4A719	D4A719		Snx12	>tr|D4A719|D4A719_RAT Protein Snx12 OS=Rattus norvegicus GN=Snx12 PE=1 SV=1	19.807	170	911540	1079000	11494000	15283000	8586300	6383500	677290	1277900	10506000	10280000	6417300	10875000	1065800	1164900	4699900	11235000	11736000	184590
D4A720	D4A720		Srsf7	>tr|D4A720|D4A720_RAT Protein Srsf7 OS=Rattus norvegicus GN=Srsf7 PE=4 SV=1	27.377	238	1528700	3205600	15082000	23161000	11613000	6300300	2717500	2743100	21809000	26678000	7205600	8892200	281950	1465400	19872000	5414700	4745900	6343400
D4A742	D4A742		Romo1	>tr|D4A742|D4A742_RAT Protein LOC100910944 OS=Rattus norvegicus GN=Romo1 PE=4 SV=1	8.1828	79	1797100	4170500	11409000	11999000	12631000	17133000	1641400	2739400	4954100	13538000	16729000	6640400	2127600	631700	8115700	10313000	25570000	2616800
D4A746	D4A746		Gmppb	>tr|D4A746|D4A746_RAT GDP-mannose pyrophosphorylase B (Predicted), isoform CRA_a OS=Rattus norvegicus GN=Gmppb PE=4 SV=1	39.902	360	9433500	11123000	74566000	97723000	52168000	65399000	6226800	7615900	49381000	72219000	25233000	30344000	5310600	6544400	83122000	70132000	50272000	73885000
D4A777;D4A5F0	D4A777;D4A5F0		Fam114a1;Fam114a1l1	>tr|D4A777|D4A777_RAT Protein Fam114a1 OS=Rattus norvegicus GN=Fam114a1 PE=4 SV=2;>tr|D4A5F0|D4A5F0_RAT Protein Fam114a1l1 OS=Rattus norvegicus GN=Fam114a1l1 PE=4 SV=2	60.757	567	357580	537340	2090100	2144600	1769500	1604300	251280	96120	1106800	3250000	912860	821540	438590	602720	2722300	1279100	9052600	2894400
D4A781;M0RB74	D4A781;M0RB74		Ipo5	>tr|D4A781|D4A781_RAT Protein Ipo5 OS=Rattus norvegicus GN=Ipo5 PE=4 SV=1;>tr|M0RB74|M0RB74_RAT Protein Ipo5 OS=Rattus norvegicus GN=Ipo5 PE=4 SV=1	123.7	1097	373390	946160	8073500	9462800	2983400	9115500	534400	853090	8825200	9065700	2904200	7518700	945600	1515100	9889000	15199000	18753000	11172000
D4A7D7	D4A7D7		H6pd	>tr|D4A7D7|D4A7D7_RAT Hexose-6-phosphate dehydrogenase (Glucose 1-dehydrogenase) (Predicted), isoform CRA_b OS=Rattus norvegicus GN=H6pd PE=4 SV=1	89.839	797	12761000	19329000	87506000	104210000	72703000	93132000	13045000	12537000	64577000	122000000	85017000	98947000	9862300	8528200	99778000	73540000	119110000	69787000
D4A7E8	D4A7E8	Methylenetetrahydrofolate reductase	Mthfr	>tr|D4A7E8|D4A7E8_RAT Methylenetetrahydrofolate reductase OS=Rattus norvegicus GN=Mthfr PE=3 SV=1	78.737	695	118250	418640	822640	1004400	1575400	2534900	108600	109380	664910	1597000	2301500	2500400	70877	147770	1325200	1203400	3618000	2345300
D4A7F2	D4A7F2		Mycbp	>tr|D4A7F2|D4A7F2_RAT Protein Mycbp OS=Rattus norvegicus GN=Mycbp PE=4 SV=1	11.97	103	934190	670450	8718300	11192000	18988000	14080000	1076800	1529900	9322800	15238000	12339000	13979000	1696300	837470	5903100	12057000	20366000	1304200
D4A7G5	D4A7G5		Ganc	>tr|D4A7G5|D4A7G5_RAT Protein Ganc OS=Rattus norvegicus GN=Ganc PE=3 SV=1	103.56	913	32504	72024	3982700	2697700	904410	4123400	313350	50544	2569100	5633600	2521700	4096600	54868	38305	1142900	3568500	4247500	325230
D4A7G9	D4A7G9		RGD1564804	>tr|D4A7G9|D4A7G9_RAT Protein RGD1564804 OS=Rattus norvegicus GN=RGD1564804 PE=4 SV=1	21.903	199	4920000	6115000	71061000	38394000	29766000	71848000	3767500	7705100	61847000	153840000	65826000	94238000	3744100	5469600	65819000	121410000	86124000	347630
D4A7I6	D4A7I6		RGD1309995	>tr|D4A7I6|D4A7I6_RAT Protein RGD1309995 OS=Rattus norvegicus GN=RGD1309995 PE=4 SV=1	136.13	1173	90963	360990	2674100	2598300	2023400	1347900	302320	177270	2488100	2846700	1226800	2974100	404160	180730	3204800	1580900	2990000	530830
D4A7I8	D4A7I8		Sumf1	>tr|D4A7I8|D4A7I8_RAT Protein Sumf1 OS=Rattus norvegicus GN=Sumf1 PE=4 SV=1	40.079	372	0	0	0	0	0	565970	0	0	1038900	1205200	403290	0	0	0	367790	658530	565050	512950
D4A7J8	D4A7J8		Prpf4	>tr|D4A7J8|D4A7J8_RAT PRP4 pre-mRNA processing factor 4 homolog (Yeast) OS=Rattus norvegicus GN=Prpf4 PE=4 SV=1	58.342	521	0	12557000	320810	0	0	521810	619180	163960	328550	327550	313330	284820	79290	445940	432690	243850	0	241340
D4A7L0	D4A7L0		Lbx2	>tr|D4A7L0|D4A7L0_RAT Protein Lbx2 OS=Rattus norvegicus GN=Lbx2 PE=4 SV=1	21.111	196	0	0	2158100	0	0	0	0	0	0	0	0	0	0	0	0	0	0	0
D4A7L4	D4A7L4		Ndufb11	>tr|D4A7L4|D4A7L4_RAT NADH dehydrogenase (Ubiquinone) 1 beta subcomplex, 11 (Predicted) OS=Rattus norvegicus GN=Ndufb11 PE=4 SV=1	17.634	151	16540000	28153000	159820000	177580000	29997000	45337000	31297000	33548000	47231000	195540000	44110000	95336000	17934000	3234800	194640000	200330000	71002000	63041000
D4A7L6	D4A7L6		Rpia	>tr|D4A7L6|D4A7L6_RAT Protein Rpia OS=Rattus norvegicus GN=Rpia PE=3 SV=1	32.472	303	731480	1011100	9807700	7966100	8336700	8189900	876390	620290	9087500	12115000	2292100	9883300	178400	706500	17315000	9472000	4129000	2903100
D4A7N1	D4A7N1	Coiled-coil-helix-coiled-coil-helix domain-containing protein 6, mitochondrial	Chchd6	>sp|D4A7N1|MIC25_RAT MICOS complex subunit Mic25 OS=Rattus norvegicus GN=Chchd6 PE=3 SV=1	29.211	261	1288800	1940300	9578000	7180300	13443000	22728000	1010400	1452100	5417000	2764700	5600800	11525000	862150	543770	9905400	13053000	20103000	15813000
D4A7R0	D4A7R0	Signal recognition particle subunit SRP72	LOC100910272	>tr|D4A7R0|D4A7R0_RAT Signal recognition particle subunit SRP72 OS=Rattus norvegicus GN=LOC100910272 PE=3 SV=2	74.651	670	2201200	3625500	19479000	20700000	10860000	21808000	2030000	2172700	12633000	14232000	11585000	14944000	1858700	1629400	26126000	20014000	25184000	11941000
D4A7R3	D4A7R3		Nup205	>tr|D4A7R3|D4A7R3_RAT Nucleoporin 205kDa (Predicted) OS=Rattus norvegicus GN=Nup205 PE=4 SV=1	227.23	2008	346510	252410	1170100	1070200	230240	983380	240810	220690	1023200	512880	276670	688150	185760	268200	2025200	809570	344050	439640
D4A7U1	D4A7U1		Zyx	>tr|D4A7U1|D4A7U1_RAT Protein Zyx OS=Rattus norvegicus GN=Zyx PE=4 SV=1	60.303	564	27134	545450	423610	1652000	904930	820240	201870	130810	1974300	1462600	634490	806750	365890	246320	2077600	2485700	1012300	309510
D4A7U6	D4A7U6		Lsm3	>tr|D4A7U6|D4A7U6_RAT LSM3 homolog, U6 small nuclear RNA associated (S. cerevisiae) (Predicted) OS=Rattus norvegicus GN=Lsm3 PE=4 SV=1	11.845	102	3587300	7769300	22878000	68927000	63480000	66141000	5717000	5915500	31992000	83219000	34080000	41076000	5212400	1549800	29094000	49263000	38510000	12783000
D4A7V8	D4A7V8		Vsig8	>tr|D4A7V8|D4A7V8_RAT Protein Vsig8 OS=Rattus norvegicus GN=Vsig8 PE=4 SV=1	44.237	417	0	0	2626200	0	8225	0	0	0	0	0	0	2578.7	0	0	0	0	45037	0
D4A7W1	D4A7W1		Abhd2	>tr|D4A7W1|D4A7W1_RAT Abhydrolase domain containing 2 (Predicted) OS=Rattus norvegicus GN=Abhd2 PE=4 SV=1	48.335	425	0	0	465930	0	0	0	0	0	0	0	419000	0	0	0	940610	0	0	0
D4A7W8;G3V6A9	D4A7W8;G3V6A9		LOC100911714	>tr|D4A7W8|D4A7W8_RAT Uncharacterized protein (Fragment) OS=Rattus norvegicus PE=4 SV=2;>tr|G3V6A9|G3V6A9_RAT Microfibrillar-associated protein 4 OS=Rattus norvegicus GN=LOC100911714 PE=4 SV=1	28.805	256	641740	953400	3100800	0	1114400	5426300	791670	1096500	4640200	2117600	5905700	1340700	356940	886260	0	1529500	11524000	9405200
D4A7X1	D4A7X1		Mrps16	>tr|D4A7X1|D4A7X1_RAT Protein Mrps16 OS=Rattus norvegicus GN=Mrps16 PE=3 SV=1	15.243	135	969360	1663300	11434000	25376000	12365000	11091000	1432400	2573900	10788000	24902000	7358000	9453200	1597500	1047500	11375000	11414000	8992500	2181600
D4A7X5	D4A7X5		Ppm1k	>tr|D4A7X5|D4A7X5_RAT Protein Ppm1k OS=Rattus norvegicus GN=Ppm1k PE=3 SV=1	41.013	372	902770	951480	3106200	4668500	2696600	5335500	918960	1263400	9426300	8621300	7179200	6608500	246560	242940	2162900	1931800	3426600	3051800
D4A7Y9	D4A7Y9		Smdt1	>tr|D4A7Y9|D4A7Y9_RAT Protein Smdt1 OS=Rattus norvegicus GN=Smdt1 PE=4 SV=1	11.586	107	184430	610910	3366200	3639300	808520	2272100	329360	454140	2340200	1895000	1212200	0	88233	213020	3035300	1970400	2597400	0
D4A830	D4A830		Ppa2	>tr|D4A830|D4A830_RAT Protein Ppa2 OS=Rattus norvegicus GN=Ppa2 PE=4 SV=1	37.842	330	13894000	19431000	117060000	85705000	51515000	104650000	15520000	18473000	100460000	134210000	84665000	79799000	6821800	10348000	85973000	91645000	112950000	108570000
D4A832	D4A832		Slc43a3	>tr|D4A832|D4A832_RAT Protein Slc43a3 OS=Rattus norvegicus GN=Slc43a3 PE=4 SV=1	56.008	499	0	0	1878600	1049300	0	457820	0	0	550350	1438200	883380	727230	0	0	1005800	692200	854980	972180
D4A833	D4A833		Mrps30	>tr|D4A833|D4A833_RAT Mitochondrial ribosomal protein S30 (Predicted), isoform CRA_a OS=Rattus norvegicus GN=Mrps30 PE=4 SV=1	50.001	440	1324500	0	7664400	12063000	4302100	6769500	1820900	1110300	7013800	13821000	4876900	6268800	1148400	665160	7754700	7747300	5793300	4227300
D4A845;D3ZQ91	D4A845;D3ZQ91		Rpa3;LOC100362927	>tr|D4A845|D4A845_RAT Protein Rpa3 OS=Rattus norvegicus GN=Rpa3 PE=4 SV=1;>tr|D3ZQ91|D3ZQ91_RAT Protein LOC100362927 OS=Rattus norvegicus GN=LOC100362927 PE=4 SV=1	13.639	121	149150	309390	12238000	14879000	2637900	11396000	165190	151580	6421900	5939100	1291500	4303600	0	108300	3853700	2836000	10172000	714320
D4A857	D4A857		Ipo9	>tr|D4A857|D4A857_RAT Importin 9 (Predicted) OS=Rattus norvegicus GN=Ipo9 PE=4 SV=2	116.01	1041	200060	571440	5280200	6733000	608160	3149700	308060	330640	3362600	6407200	1590200	4577600	494130	503550	4101700	3789600	5879800	1652100
D4A885	D4A885		Abca13	>tr|D4A885|D4A885_RAT Protein Abca13 OS=Rattus norvegicus GN=Abca13 PE=4 SV=2	401.89	3539	0	0	150710	168440	125950	240110	0	0	135610	132610	0	141400	0	0	93059	199350	179110	230770
D4A896	D4A896		Abcg3l3	>tr|D4A896|D4A896_RAT Protein Abcg3l3 OS=Rattus norvegicus GN=Abcg3l3 PE=4 SV=1	73.429	647	0	0	0	0	0	0	0	0	0	0	0	0	0	0	0	0	0	0
D4A899	D4A899		Vps13a	>tr|D4A899|D4A899_RAT Protein Vps13a OS=Rattus norvegicus GN=Vps13a PE=4 SV=2	266.49	2335	106260	268400	1420100	3422500	134590	2245700	172540	134320	2520900	3980000	1771600	2090600	221740	90658	2126400	2087100	2944100	1050800
D4A8A0	D4A8A0		Cad	>tr|D4A8A0|D4A8A0_RAT DNA fragmentation factor subunit beta OS=Rattus norvegicus GN=Cad PE=3 SV=2	243.37	2224	1041700	1883900	10911000	19443000	2646800	12492000	891740	1098400	13109000	15867000	7248000	8585900	1244900	971840	14024000	16028000	11153000	6646200
D4A8D5;D3ZD13	D4A8D5		Flnb	>tr|D4A8D5|D4A8D5_RAT Filamin, beta (Predicted) OS=Rattus norvegicus GN=Flnb PE=4 SV=1	275.31	2578	3271700	4225500	37383000	50482000	8085600	33906000	2771600	3036700	32073000	35183000	21418000	29943000	2841200	2191200	34262000	31740000	44586000	20584000
D4A8E7	D4A8E7		Commd6	>tr|D4A8E7|D4A8E7_RAT Protein Commd6 OS=Rattus norvegicus GN=Commd6 PE=4 SV=1	11.991	108	231960	434140	1939100	4256300	5881600	6131100	287180	382820	1199600	8480900	2250000	3057900	295480	249460	3096700	2749900	5567600	291380
D4A8F2	D4A8F2		Rsu1	>tr|D4A8F2|D4A8F2_RAT Protein Rsu1 OS=Rattus norvegicus GN=Rsu1 PE=4 SV=2	29.394	259	1776200	1547500	34545000	13348000	5641200	38531000	1311900	2073300	38674000	45421000	13428000	26097000	2727500	1382300	28396000	27938000	12391000	42482000
D4A8G0	D4A8G0		Lsm12	>tr|D4A8G0|D4A8G0_RAT Protein Lsm12 OS=Rattus norvegicus GN=Lsm12 PE=4 SV=1	21.701	195	353410	524030	8777500	8471000	2962000	6910900	0	441560	801770	9946000	4617700	6128900	444370	0	10465000	8800700	8772400	1506600
D4A8G5	D4A8G5		Tgfbi	>tr|D4A8G5|D4A8G5_RAT Protein Tgfbi OS=Rattus norvegicus GN=Tgfbi PE=4 SV=2	74.752	685	603960	703850	5455500	6412100	2783100	2867100	1017300	565860	1857300	4144600	7381600	5875600	366710	320690	4922900	5677400	5389400	3077900
D4A8G7	D4A8G7		Snw1	>tr|D4A8G7|D4A8G7_RAT Protein Snw1 OS=Rattus norvegicus GN=Snw1 PE=4 SV=1	61.463	536	0	0	785340	979500	1440200	92154	0	0	829060	1768700	36518	385110	0	0	311940	1140500	545960	168000
D4A8H3	D4A8H3		Uba6	>tr|D4A8H3|D4A8H3_RAT Protein Uba6 OS=Rattus norvegicus GN=Uba6 PE=4 SV=1	117.93	1053	394050	1668100	8816400	6445300	2469800	5273400	389960	753630	3609100	5640900	1219900	5338900	533440	1206600	12940000	5585400	6239200	1944900
D4A8H5	D4A8H5		Ppp4r2	>tr|D4A8H5|D4A8H5_RAT Protein Ppp4r2 OS=Rattus norvegicus GN=Ppp4r2 PE=4 SV=2	45.943	413	0	0	196130	2860900	969040	1384800	0	0	1193000	3064700	1051000	1976200	0	0	72941	683840	1956200	95222
D4A8H8;D3ZX82	D4A8H8		Cyfip1	>tr|D4A8H8|D4A8H8_RAT Cytoplasmic FMR1 interacting protein 1 (Predicted) OS=Rattus norvegicus GN=Cyfip1 PE=4 SV=1	145.26	1253	538350	1148500	6610000	8804700	4062900	5855400	1015400	775490	7109400	8405100	3892400	5924200	548890	488550	6428200	5733800	21862000	2516800
D4A8K4	D4A8K4		Tmem82	>tr|D4A8K4|D4A8K4_RAT Protein Tmem82 OS=Rattus norvegicus GN=Tmem82 PE=4 SV=1	38.946	355	0	0	2018900	4069100	481750	984700	0	0	1319100	1108000	2439200	1796400	0	0	2630800	2181400	1195900	604000
D4A8L5	D4A8L5		Mocs3	>tr|D4A8L5|D4A8L5_RAT Adenylyltransferase and sulfurtransferase MOCS3 OS=Rattus norvegicus GN=Mocs3 PE=3 SV=1	49.388	458	0	325160	373000	1153800	127330	968820	0	38036	310200	183870	433460	502080	3230.1	49826	543080	493450	616900	466580
D4A8M2	D4A8M2		Cask	>tr|D4A8M2|D4A8M2_RAT Peripheral plasma membrane protein CASK OS=Rattus norvegicus GN=Cask PE=4 SV=2	40.845	356	0	0	552960	0	165610	0	0	0	280250	0	229470	565670	0	0	0	0	905160	0
D4A8N1	D4A8N1		Dpm1	>tr|D4A8N1|D4A8N1_RAT Protein Dpm1 OS=Rattus norvegicus GN=Dpm1 PE=4 SV=1	29.249	260	1162500	3991000	14045000	18090000	4348500	17534000	1551600	2207600	10956000	23877000	11715000	11062000	2006500	1521500	18673000	12935000	15254000	10253000
D4A8N2	D4A8N2		Fdx1l	>tr|D4A8N2|D4A8N2_RAT Protein Fdx1l OS=Rattus norvegicus GN=Fdx1l PE=4 SV=1	18.77	174	552310	818990	4892800	4797000	5485600	9508400	1159400	1162600	6414900	10371000	1647900	2126500	327000	825850	3521700	3622600	4342000	3415800
D4A8P9	D4A8P9		Iars2	>tr|D4A8P9|D4A8P9_RAT Protein Iars2 OS=Rattus norvegicus GN=Iars2 PE=3 SV=2	48.681	442	2862300	5364200	21384000	33127000	27631000	9247200	4542500	4819500	20787000	30663000	26748000	27703000	3259800	2874200	16550000	25875000	35193000	15730000
D4A8S2	D4A8S2		RGD1307603	>tr|D4A8S2|D4A8S2_RAT Protein RGD1307603 OS=Rattus norvegicus GN=RGD1307603 PE=4 SV=1	20.065	174	0	151590	644920	0	0	302320	0	0	0	0	249540	0	47472	0	0	0	0	0
D4A8T3	D4A8T3		Copz1	>tr|D4A8T3|D4A8T3_RAT Coatomer protein complex, subunit zeta 1 (Predicted) OS=Rattus norvegicus GN=Copz1 PE=4 SV=1	20.198	177	15237000	25394000	166340000	304790000	206010000	192280000	11488000	14196000	134100000	254980000	117300000	165990000	18809000	13695000	159430000	236650000	221050000	16759000
D4A8U7;P28023	D4A8U7;P28023	Dynactin subunit 1	Dctn1	>tr|D4A8U7|D4A8U7_RAT Dynactin 1, isoform CRA_a OS=Rattus norvegicus GN=Dctn1 PE=4 SV=2;>sp|P28023|DCTN1_RAT Dynactin subunit 1 OS=Rattus norvegicus GN=Dctn1 PE=1 SV=2	141.94	1281	611810	1020900	7715300	14015000	10232000	8744100	750140	793860	5476300	13407000	5110300	10913000	471230	391720	10880000	10649000	12566000	8586800
D4A8X2	D4A8X2			>tr|D4A8X2|D4A8X2_RAT Uncharacterized protein OS=Rattus norvegicus PE=4 SV=1	29.55	266	414740	669470	2949900	2818700	659970	0	203500	309190	2149000	3630800	0	135790	308090	220610	2636500	1995100	0	0
D4A8X7	D4A8X7		Snhg8	>tr|D4A8X7|D4A8X7_RAT LOC361111 (Predicted), isoform CRA_a OS=Rattus norvegicus GN=Smim4 PE=4 SV=1	9.7153	79	299870	724220	0	13015000	4534700	6622400	880680	1329300	3574800	14542000	4154700	2137700	664510	484540	8882100	1643600	6860200	137840
D4A8Z3	D4A8Z3		Frrs1	>tr|D4A8Z3|D4A8Z3_RAT Protein Frrs1 OS=Rattus norvegicus GN=Frrs1 PE=4 SV=2	65.868	593	356430	3041700	6911100	6371900	5962700	9843900	1316400	2421200	14124000	10548000	5861100	12597000	551290	802710	729370	4161400	9691300	1074200
D4A900	D4A900		Filip1l	>tr|D4A900|D4A900_RAT Protein Filip1l OS=Rattus norvegicus GN=Filip1l PE=1 SV=1	129.52	1129	0	0	0	0	7176100	0	0	0	0	0	26667	4821000	0	0	0	92480	24314	473410
D4A904	D4A904		Nags	>tr|D4A904|D4A904_RAT N-acetylglutamate synthase (Predicted), isoform CRA_a OS=Rattus norvegicus GN=Nags PE=4 SV=1	57.42	527	2216000	2151500	11073000	11524000	6605000	15155000	3744100	1550700	8562900	19649000	9930800	10821000	2013000	2419000	13422000	7889900	11246000	10764000
D4A914	D4A914		Xrn2	>tr|D4A914|D4A914_RAT 5-3 exoribonuclease 2 (Predicted), isoform CRA_c OS=Rattus norvegicus GN=Xrn2 PE=4 SV=2	63.867	561	28475	0	1401500	4735000	1917400	1641900	0	42468	293050	3816200	843940	1661300	0	46254	877410	1887800	2479100	3389300
D4A929	D4A929	WD repeat-containing protein 81	Wdr81	>sp|D4A929|WDR81_RAT WD repeat-containing protein 81 OS=Rattus norvegicus GN=Wdr81 PE=1 SV=1	212.26	1933	0	0	234860	68446	66839	69910	0	0	94209	261870	66473	106230	0	0	110760	36716	165880	21425
D4A944	D4A944		Snrnp40	>tr|D4A944|D4A944_RAT Protein Snrnp40 OS=Rattus norvegicus GN=Snrnp40 PE=4 SV=2	39.353	358	304790	386290	9951500	15371000	4861500	7749000	359200	916020	7438600	13269000	3676600	8411100	0	106400	11899000	9336000	2722000	12900000
D4A962	D4A962		Hnrnpul1	>tr|D4A962|D4A962_RAT Heterogeneous nuclear ribonucleoprotein U-like 1 (Predicted) OS=Rattus norvegicus GN=Hnrnpul1 PE=4 SV=1	96.001	859	2373400	1584100	2537700	5226300	2688700	9527500	2580600	2865800	2109400	5321300	1040700	2486200	835340	2134300	620110	2693500	765020	1551800
D4A970	D4A970		Ovca2	>tr|D4A970|D4A970_RAT Protein Ovca2 OS=Rattus norvegicus GN=Ovca2 PE=4 SV=1	24.311	227	1103200	1934500	13019000	11106000	7713500	15383000	615320	1393900	6977100	10861000	7702000	13363000	702750	1071300	11009000	16153000	30108000	268110
D4A986	D4A986		Mbd2	>tr|D4A986|D4A986_RAT Protein Mbd2 OS=Rattus norvegicus GN=Mbd2 PE=4 SV=2	43.238	412	0	0	310040	395940	261470	575180	0	0	0	569680	65593	543530	0	0	440450	219210	50380	303970
D4A994	D4A994		Emc1	>tr|D4A994|D4A994_RAT Protein Emc1 OS=Rattus norvegicus GN=Emc1 PE=4 SV=1	111.18	993	2287600	4258000	14627000	30416000	10362000	26709000	2356500	2389900	7242800	22567000	12142000	17140000	2517000	581000	23783000	18494000	27871000	9030100
D4A997	D4A997		Htatsf1	>tr|D4A997|D4A997_RAT HIV TAT specific factor 1 (Predicted) OS=Rattus norvegicus GN=Htatsf1 PE=4 SV=2	88.623	776	0	133350	602030	0	0	105870	0	0	0	0	0	107850	0	0	400110	0	85527	68422
D4A9A3	D4A9A3		Cenpv	>tr|D4A9A3|D4A9A3_RAT Protein Cenpv OS=Rattus norvegicus GN=Cenpv PE=4 SV=2	27.382	251	0	0	608940	4152100	95130	0	0	0	486730	1092500	0	0	0	0	871400	447550	493510	644910
D4A9D6	D4A9D6		Dhx9	>tr|D4A9D6|D4A9D6_RAT DEAH (Asp-Glu-Ala-His) box polypeptide 9 (Predicted) OS=Rattus norvegicus GN=Dhx9 PE=4 SV=1	131.73	1174	900890	1644400	5700000	11170000	2464600	4007400	2094900	1984300	9979700	19524000	4393900	11187000	1078600	566960	7567700	3500100	2654900	4070300
D4A9D8	D4A9D8	Oxysterol-binding protein	Osbp	>tr|D4A9D8|D4A9D8_RAT Oxysterol-binding protein OS=Rattus norvegicus GN=Osbp PE=1 SV=2	77.806	682	950790	1575400	8602300	10836000	4812900	8479600	419960	888570	9605700	11312000	6427700	6373900	769880	818250	7776400	11671000	9803400	3318300
D4A9G5	D4A9G5		Dpy19l3	>tr|D4A9G5|D4A9G5_RAT Protein Dpy19l3 OS=Rattus norvegicus GN=Dpy19l3 PE=4 SV=1	82.965	716	0	0	437960	2055100	91763	892100	0	0	479140	779130	1224200	1022100	0	0	637190	541190	324500	217130
D4A9H0;Q6GQP4	D4A9H0;Q6GQP4	Ras-related protein Rab-31	Rab22a;Rab31	>tr|D4A9H0|D4A9H0_RAT Protein Rab22a OS=Rattus norvegicus GN=Rab22a PE=4 SV=1;>sp|Q6GQP4|RAB31_RAT Ras-related protein Rab-31 OS=Rattus norvegicus GN=Rab31 PE=1 SV=2	20.841	187	955840	1426800	5637800	8529900	1696600	5858500	754660	1009800	5506000	8089300	649890	2417400	850080	444430	2431500	2084400	1775700	0
D4A9H2	D4A9H2		Dpt	>tr|D4A9H2|D4A9H2_RAT Dermatopontin (Predicted), isoform CRA_c OS=Rattus norvegicus GN=Dpt PE=4 SV=1	19.968	166	277590	2103500	11031000	16232000	12210000	10278000	687630	324830	8291100	13076000	4719300	5714700	2337000	1166900	16060000	8610000	17994000	294830
D4A9L2	D4A9L2		Srsf1	>tr|D4A9L2|D4A9L2_RAT Protein Srsf1 OS=Rattus norvegicus GN=Srsf1 PE=4 SV=1	27.744	248	6773200	15208000	74747000	59673000	15014000	34914000	9177300	12222000	58839000	72938000	15757000	32891000	8546900	5222200	64925000	21962000	19737000	14572000
D4A9N5	D4A9N5		Trim25	>tr|D4A9N5|D4A9N5_RAT Protein Trim25 OS=Rattus norvegicus GN=Trim25 PE=4 SV=2	44.749	394	2073000	3242700	17642000	36329000	22277000	29624000	1179400	1856600	6686600	21285000	12819000	15267000	1036200	1637700	18931000	9885600	26650000	23520000
D4A9N8	D4A9N8		Mpv17l2	>tr|D4A9N8|D4A9N8_RAT Protein Mpv17l2 OS=Rattus norvegicus GN=Mpv17l2 PE=4 SV=1	22.504	200	0	0	1825900	3739400	2190900	727600	0	0	1094800	3019100	1188700	511870	0	0	1443100	1227600	1267500	0
D4A9P7;D3ZVA6;F1M1H5	D4A9P7;D3ZVA6		LOC100363408;Bola2	>tr|D4A9P7|D4A9P7_RAT Protein LOC100363408 OS=Rattus norvegicus GN=LOC100363408 PE=3 SV=1;>tr|D3ZVA6|D3ZVA6_RAT Protein LOC100363408 OS=Rattus norvegicus GN=Bola2 PE=3 SV=1	10.186	86	3194400	8497900	30857000	70100000	150590000	89944000	3807700	5132800	47867000	48461000	38952000	65813000	4735300	4181600	74051000	27473000	59967000	16781000
D4A9T0	D4A9T0		Caskin2	>tr|D4A9T0|D4A9T0_RAT Cask-interacting protein 2 (Predicted) OS=Rattus norvegicus GN=Caskin2 PE=4 SV=1	126.98	1200	0	0	784450	1029300	204750	144210	0	0	524270	861980	518600	240640	0	0	1032100	664030	179780	339760
D4A9T3;P63159;F1MA29;D3ZCR3;D3ZXR5;D3ZL49;D3ZC69;D3ZLG3;F1LNG6;M0R7R5;F1LTL3;D3ZXP6;D4A6A9;D3ZGW6;D3ZMK0;M0R7K7;D4A4X8;D3ZIU9;D4A2L7;F1LVZ2;F1M607;F1M6B2;M0R8R0	D4A9T3;P63159;F1MA29;D3ZCR3;D3ZXR5;D3ZL49;D3ZC69	High mobility group protein B1	Hmg1l1;Hmgb1;LOC685520;LOC100909581;RGD1563668	>tr|D4A9T3|D4A9T3_RAT Protein Hmg1l1 OS=Rattus norvegicus GN=Hmg1l1 PE=4 SV=2;>sp|P63159|HMGB1_RAT High mobility group protein B1 OS=Rattus norvegicus GN=Hmgb1 PE=1 SV=2;>tr|F1MA29|F1MA29_RAT Protein LOC685520 OS=Rattus norvegicus GN=LOC681718 PE=4 SV=1;>t	24.677	213	41444000	63582000	519740000	600310000	283860000	440420000	50528000	92219000	541490000	834150000	351130000	497150000	27263000	42653000	527460000	567620000	383150000	390870000
D4A9U6	D4A9U6		Ubr2	>tr|D4A9U6|D4A9U6_RAT Protein Ubr2 OS=Rattus norvegicus GN=Ubr2 PE=4 SV=2	198.89	1751	71033	153740	1758500	2056500	338510	1755900	142600	130850	1600200	1639900	792770	1378300	179940	134760	2839000	2508700	2092700	1325400
D4A9U9	D4A9U9		Mreg	>tr|D4A9U9|D4A9U9_RAT Protein Mreg OS=Rattus norvegicus GN=Mreg PE=4 SV=1	25.015	214	108480	596520	3256600	948120	363310	2458600	114890	86784	1355400	1810500	1793500	1598900	80026	160580	1533400	5018000	3476700	0
D4A9V7	D4A9V7		LOC100911305	>tr|D4A9V7|D4A9V7_RAT Protein LOC100911305 OS=Rattus norvegicus GN=LOC100911305 PE=4 SV=1	65.752	586	0	0	291730	676610	180960	190750	35673	0	532270	729720	275250	212430	39067	11982	564500	140050	212070	321440
D4A9Y0	D4A9Y0		Sdf2l1	>tr|D4A9Y0|D4A9Y0_RAT Protein Sdf2l1 OS=Rattus norvegicus GN=Sdf2l1 PE=4 SV=1	23.403	220	4991800	9253900	41352000	62253000	16644000	43679000	3256500	3824700	25747000	43301000	21508000	30870000	4500800	3496700	36151000	25259000	35713000	701620
D4A9Z2	D4A9Z2	DNA topoisomerase	Top3b	>tr|D4A9Z2|D4A9Z2_RAT DNA topoisomerase OS=Rattus norvegicus GN=Top3b PE=3 SV=1	96.849	862	18834	38960	572840	223950	70969	2172300	83920	26902	3179900	121130	76884	13766	84695	35893	144380	921550	0	0
D4A9Z6	D4A9Z6		Mrps35	>tr|D4A9Z6|D4A9Z6_RAT Mitochondrial ribosomal protein S35 (Predicted) OS=Rattus norvegicus GN=Mrps35 PE=4 SV=1	36.206	320	908400	2233800	9222500	17009000	8599000	8780600	709820	1714500	7458000	17323000	10555000	10204000	534620	1596600	10850000	16356000	12050000	10529000
D4AA14	D4AA14		Aifm2	>tr|D4AA14|D4AA14_RAT Protein Aifm2 OS=Rattus norvegicus GN=Aifm2 PE=4 SV=1	40.69	373	1098100	731840	8088200	8783300	1556300	6973500	1003200	988000	6547900	7147900	2129400	4967400	1024600	664560	6545300	5661800	3210600	3133400
D4AA31	D4AA31		Prcp	>tr|D4AA31|D4AA31_RAT Protein Prcp OS=Rattus norvegicus GN=Prcp PE=4 SV=1	55.562	493	0	0	819900	2866700	0	809480	0	0	1320100	2556400	1227300	448440	0	0	1981700	1560300	2334400	680750
D4AA35	D4AA35		Asmtl	>tr|D4AA35|D4AA35_RAT Protein Asmtl OS=Rattus norvegicus GN=Asmtl PE=3 SV=2	24.25	226	2417200	2726700	20396000	12932000	8187000	18741000	1475400	3229000	26289000	29434000	12710000	18908000	1820100	2310800	18068000	19862000	15767000	1731800
D4AA38	D4AA38		Hlcs	>tr|D4AA38|D4AA38_RAT Protein Hlcs OS=Rattus norvegicus GN=Hlcs PE=4 SV=1	78.578	723	0	0	279120	257360	0	0	0	0	891960	0	263850	344300	0	0	0	0	563870	384990
D4AA56;M0R8C5	D4AA56;M0R8C5		Eri3	>tr|D4AA56|D4AA56_RAT Protein Eri3 OS=Rattus norvegicus GN=Eri3 PE=4 SV=2;>tr|M0R8C5|M0R8C5_RAT Protein Eri3 OS=Rattus norvegicus GN=Eri3 PE=4 SV=1	34.997	316	406310	636470	3009900	1150700	0	1892800	226680	415640	1675700	1094000	1991100	3009500	293740	351380	0	432390	2032600	0
D4AA63	D4AA63		Ubqln2	>tr|D4AA63|D4AA63_RAT Protein Ubqln2 OS=Rattus norvegicus GN=Ubqln2 PE=4 SV=1	67.259	638	1723100	1861200	6725300	4778200	6371900	11145000	974430	882730	5977700	8982700	5024300	6732300	2035600	1493700	10599000	9800200	6977200	7862000
D4AA77	D4AA77		Plxnd1	>tr|D4AA77|D4AA77_RAT Plexin D1 (Predicted) OS=Rattus norvegicus GN=Plxnd1 PE=4 SV=2	190.13	1716	0	0	82117	180210	90681	41734	0	0	96832	72081	135330	11723	0	0	109970	22915	24777	215020
D4AAC7	D4AAC7		Ipo11	>tr|D4AAC7|D4AAC7_RAT Protein Ipo11 OS=Rattus norvegicus GN=Ipo11 PE=4 SV=2	81.93	707	36778	0	267490	418580	77277	526480	29856	42325	262400	377110	156060	296810	47106	41168	1336800	703870	1269700	140030
D4AAE5	D4AAE5		Tmem56	>tr|D4AAE5|D4AAE5_RAT Protein Tmem56 OS=Rattus norvegicus GN=Tmem56 PE=4 SV=1	30.097	263	215050	339060	1193900	1862900	0	2325400	197010	182710	1815000	2853300	755680	2136300	152010	79751	1321700	1697700	1098800	0
D4AAE9	D4AAE9		Cisd2	>tr|D4AAE9|D4AAE9_RAT Protein Cisd2 OS=Rattus norvegicus GN=Cisd2 PE=4 SV=1	15.293	135	6447800	13065000	75864000	75061000	66102000	80713000	6272500	6593200	44851000	112980000	28465000	41539000	9807400	4089900	83982000	64055000	63905000	3028300
D4AAH6	D4AAH6		Psmg1	>tr|D4AAH6|D4AAH6_RAT Down syndrome critical region homolog 2 (Human) (Predicted), isoform CRA_d OS=Rattus norvegicus GN=Psmg1 PE=4 SV=2	23.214	201	1409700	1362300	8591600	9702100	338060	8543600	913870	1632800	5753200	9007400	4419100	8925500	1013400	818150	13533000	6709000	9430900	13101000
D4AAH9	D4AAH9		Tbc1d23	>tr|D4AAH9|D4AAH9_RAT Protein Tbc1d23 OS=Rattus norvegicus GN=Tbc1d23 PE=4 SV=1	76.565	684	0	0	0	222230	0	226210	0	0	0	235410	121740	201240	0	0	0	220550	227090	0
D4AAM0	D4AAM0		Tnpo3	>tr|D4AAM0|D4AAM0_RAT Protein Tnpo3 OS=Rattus norvegicus GN=Tnpo3 PE=4 SV=2	104.18	923	60530	162200	415030	202240	0	99081	97335	74787	797780	524810	92511	538230	152820	113030	657960	404570	715810	92293
D4AAT4	D4AAT4		Snrpf	>tr|D4AAT4|D4AAT4_RAT Small nuclear ribonucleoprotein F OS=Rattus norvegicus GN=Snrpf PE=3 SV=1	9.7251	86	1301500	4031200	13881000	35004000	33981000	18543000	2718700	3556400	21691000	24642000	9157500	898660	1745100	1407100	15134000	6750500	8060100	466760
D4AAU5	D4AAU5		Rassf8	>tr|D4AAU5|D4AAU5_RAT Protein Rassf8 OS=Rattus norvegicus GN=Rassf8 PE=4 SV=1	47.971	419	54880	183790	952620	1431700	191490	0	0	99964	932530	605090	0	0	94332	112050	470890	1716200	0	0
D4AAU6	D4AAU6		Ccdc25	>tr|D4AAU6|D4AAU6_RAT Coiled-coil domain containing 25 (Predicted) OS=Rattus norvegicus GN=Ccdc25 PE=4 SV=1	24.466	208	330980	873750	5853500	12413000	3619200	4199200	542700	546800	2510100	9999900	1926400	7365500	490350	421380	7274900	11520000	5804800	244170
D4AAV1	D4AAV1		Amdhd1	>tr|D4AAV1|D4AAV1_RAT Protein Amdhd1 OS=Rattus norvegicus GN=Amdhd1 PE=4 SV=1	46.57	425	11058000	11870000	62843000	39454000	38752000	44044000	9756700	19233000	53864000	99353000	93269000	60431000	7249300	16508000	33028000	49672000	64856000	38712000
D4AAW2;Q75N33	D4AAW2;Q75N33	Protein transport protein Sec16B	Sec16b	>tr|D4AAW2|D4AAW2_RAT Protein transport protein Sec16B OS=Rattus norvegicus GN=Sec16b PE=4 SV=2;>sp|Q75N33|SC16B_RAT Protein transport protein Sec16B OS=Rattus norvegicus GN=Sec16b PE=2 SV=1	116.6	1056	201260	750680	4866400	7727200	2514100	4223600	455480	219430	1860400	3985900	2145800	1781500	445750	388860	7318700	6025100	6498300	3239100
D4AAX0	D4AAX0			>tr|D4AAX0|D4AAX0_RAT Uncharacterized protein OS=Rattus norvegicus PE=4 SV=1	24.473	222	1837000	2584300	16431000	26854000	1027100	9973700	1349600	1743200	11317000	23711000	5898200	7399300	1751000	1168500	27644000	15138000	9481900	9477100
D4AAY3	D4AAY3		Rasal2	>tr|D4AAY3|D4AAY3_RAT Protein Rasal2 OS=Rattus norvegicus GN=Rasal2 PE=4 SV=1	105.4	937	0	0	0	0	0	2334800	0	0	0	0	0	0	0	0	0	0	0	14400
D4AB01	D4AB01		Hint2	>tr|D4AB01|D4AB01_RAT Histidine triad nucleotide binding protein 2 (Predicted), isoform CRA_a OS=Rattus norvegicus GN=Hint2 PE=4 SV=1	17.38	163	13649000	23393000	242190000	290220000	289110000	186910000	18493000	34130000	244970000	410410000	196620000	291080000	17333000	10634000	210530000	235960000	279830000	81529000
D4AB03	D4AB03		Fam120a	>tr|D4AB03|D4AB03_RAT Protein Fam120a OS=Rattus norvegicus GN=Fam120a PE=4 SV=2	122.14	1115	764560	1004000	8250600	9067400	4016600	7399500	1225200	1243200	5901700	6863600	6367900	4632000	893640	802820	7821600	7880800	7442800	4744000
D4AB12	D4AB12			>tr|D4AB12|D4AB12_RAT Uncharacterized protein OS=Rattus norvegicus PE=3 SV=1	35.013	324	0	0	1693500	2056000	912010	0	190520	224090	1256000	2163600	477280	192420000	138480	227360	142360	2785200	0	2344000
D4AB17	D4AB17		Pfas	>tr|D4AB17|D4AB17_RAT Protein LOC100912917 OS=Rattus norvegicus GN=LOC100912917 PE=4 SV=2	137.05	1273	415760	968740	9394500	14680000	13661000	10175000	845890	931670	9947500	14476000	7109700	10471000	453100	809760	8472300	11344000	12875000	7549000
D4AB70	D4AB70		Edem3	>tr|D4AB70|D4AB70_RAT Protein Edem3 OS=Rattus norvegicus GN=Edem3 PE=4 SV=2	103.59	932	50818	234570	532230	314850	165200	583930	12845	36564	117430	762280	181990	303950	78068	43804	714060	585670	917720	145680
D4AB87	D4AB87		Gstm6l	>tr|D4AB87|D4AB87_RAT Protein Gstm6l OS=Rattus norvegicus GN=Gstm6l PE=3 SV=2	25.442	216	794510	498460	4424300	0	10935000	0	44895	314610	1143500	759450	0	0	39744	327160	0	90140	0	866330
D4AB89;D3ZYC9;D3ZXZ9	D4AB89;D3ZYC9;D3ZXZ9		RGD1562511	>tr|D4AB89|D4AB89_RAT Protein RGD1562511 OS=Rattus norvegicus GN=Kif17 PE=3 SV=2;>tr|D3ZYC9|D3ZYC9_RAT Protein RGD1562511 OS=Rattus norvegicus GN=Kif17 PE=3 SV=2;>tr|D3ZXZ9|D3ZXZ9_RAT Protein RGD1562511 OS=Rattus norvegicus GN=Kif17 PE=3 SV=1	55.094	492	304410	1102200	11751000	9051400	344400	13577000	2293500	1079900	11153000	13788000	5636100	3707600	1525400	191010	12865000	12641000	12251000	7497100
D4ABB8	D4ABB8	Probable phospholipid-transporting ATPase IIB	Atp9b	>sp|D4ABB8|ATP9B_RAT Probable phospholipid-transporting ATPase IIB OS=Rattus norvegicus GN=Atp9b PE=3 SV=1	129.18	1147	0	0	406720	947040	17891	319350	0	0	160730	524280	152830	119070	15008	0	686290	373150	393220	353680
D4ABC2	D4ABC2		Dnajb2	>tr|D4ABC2|D4ABC2_RAT Protein Dnajb2 OS=Rattus norvegicus GN=Dnajb2 PE=4 SV=1	28.662	259	0	0	2764600	2176700	1560700	1532400	0	0	1135400	5345500	534260	902590	0	0	1246400	1596500	1552800	850420
D4ABC4	D4ABC4		Smek1	>tr|D4ABC4|D4ABC4_RAT Protein Smek1 OS=Rattus norvegicus GN=Smek1 PE=4 SV=2	95.025	832	6950.3	14098	566570	650970	555410	471860	11935	8861.5	421040	306930	300220	645320	17951	6445.6	645030	397180	173100	405750
D4ABD7	D4ABD7		Trip11	>tr|D4ABD7|D4ABD7_RAT Protein Trip11 OS=Rattus norvegicus GN=Trip11 PE=4 SV=2	226.33	1977	45486	72664	1419100	1042200	358530	1119700	36259	49903	979590	1421900	578710	908180	52925	107210	1711700	1739700	1549200	800850
D4ABE8	D4ABE8		LOC680233	>tr|D4ABE8|D4ABE8_RAT Protein 1500011K16Rik OS=Rattus norvegicus GN=LOC680233 PE=4 SV=1	6.5286	56	0	0	0	0	0	0	0	0	0	0	0	0	0	0	0	0	0	1701600
D4ABI7	D4ABI7		Ptplad1	>tr|D4ABI7|D4ABI7_RAT Protein LOC100365676 OS=Rattus norvegicus GN=LOC100365676 PE=4 SV=2	43.104	362	2922000	5773200	25312000	35948000	2834000	24881000	2970500	2288300	18206000	38705000	20717000	25969000	4246800	1620900	31268000	27419000	32072000	18539000
D4ABK7	D4ABK7		Hnrnph3	>tr|D4ABK7|D4ABK7_RAT Heterogeneous nuclear ribonucleoprotein H3 (2H9) (Predicted), isoform CRA_c OS=Rattus norvegicus GN=Hnrnph3 PE=4 SV=1	36.869	346	0	138390	0	146730	1813200	1048600	217480	233410	767880	205600	0	212910	119900	53464	0	63006	222210	142690
D4ABL7	D4ABL7		Mrpl33	>tr|D4ABL7|D4ABL7_RAT Brain and reproductive organ-expressed protein, isoform CRA_c OS=Rattus norvegicus GN=Mrpl33 PE=4 SV=2	7.4559	65	1508100	3252200	10298000	15601000	14693000	14802000	1717000	2268900	11748000	20369000	8474800	5685300	1324400	2701400	7811700	6768200	16652000	655780
D4ABM1;P05179	D4ABM1;P05179	Cytochrome P450 2C7	LOC100361547;Cyp2c7	>tr|D4ABM1|D4ABM1_RAT Cytochrome P450 2C7 OS=Rattus norvegicus GN=Cyp2c7 PE=3 SV=2;>sp|P05179|CP2C7_RAT Cytochrome P450 2C7 OS=Rattus norvegicus GN=Cyp2c7 PE=1 SV=2	56.188	490	5308000	7600500	43379000	53764000	4772800	28601000	1108400	1192200	802150	8723600	1552200	1163700	238250	257180	7523200	3590600	798460	1589900
D4ABM3	D4ABM3		Daam1	>tr|D4ABM3|D4ABM3_RAT Dishevelled associated activator of morphogenesis 1 (Predicted) OS=Rattus norvegicus GN=Daam1 PE=4 SV=1	112.64	968	28186	95921	358510	341540	411870	169880	7333.4	59168	94569	169580	97263	182900	18932	46029	131860	123010	373200	166900
D4ABM5	D4ABM5		Mrps34	>tr|D4ABM5|D4ABM5_RAT Mitochondrial ribosomal protein S34 (Predicted), isoform CRA_a OS=Rattus norvegicus GN=Mrps34 PE=4 SV=1	25.799	218	2926000	6205400	30762000	27150000	7530200	26127000	3269200	4386400	23345000	47301000	19835000	28382000	2916400	2740700	30974000	42386000	29247000	375180
D4ABP9	D4ABP9	F-box only protein 3	Fbxo3	>sp|D4ABP9|FBX3_RAT F-box only protein 3 OS=Rattus norvegicus GN=Fbxo3 PE=3 SV=1	55.355	480	176110	118590	1461400	4846200	530750	2669800	154350	172250	1171300	6032000	3435400	4586000	125730	114720	1132700	2198900	2732100	4671200
D4ABR6	D4ABR6	Annexin	Anxa6	>tr|D4ABR6|D4ABR6_RAT Annexin (Fragment) OS=Rattus norvegicus GN=Anxa6 PE=3 SV=2	75.603	671	1118400	1195300	6202600	5973000	3865300	3207700	1157100	830090	10782000	3372000	5337100	6167800	901520	1426300	6223000	9775400	5895800	3496400
D4ABS5	D4ABS5		Pithd1	>tr|D4ABS5|D4ABS5_RAT Protein Pithd1 OS=Rattus norvegicus GN=Pithd1 PE=4 SV=1	25.207	220	609190	1054800	6310300	4699500	3502900	5103700	648300	897850	5273500	7946000	2983200	2642500	687670	490210	3556800	4569800	3837800	85662
D4ABT8	D4ABT8		Hnrnpul2	>tr|D4ABT8|D4ABT8_RAT Protein Hnrnpul2 OS=Rattus norvegicus GN=Hnrnpul2 PE=1 SV=1	84.858	745	411950	859520	2439900	8813200	5200800	5869700	1426400	1486500	5446100	14898000	3816300	13460000	407350	405870	3007600	2495000	6105000	4095200
D4ABV0	D4ABV0		RGD1566320	>tr|D4ABV0|D4ABV0_RAT Protein RGD1566320 OS=Rattus norvegicus GN=RGD1566320 PE=4 SV=1	12.108	107	2206800	5512600	22475000	15018000	8583600	2468800	1950300	3013600	6675100	13136000	6885700	4285900	3826100	2108800	26864000	9628100	17083000	6988200
D4ABW9	D4ABW9		Trim29	>tr|D4ABW9|D4ABW9_RAT Protein Trim29 OS=Rattus norvegicus GN=Trim29 PE=4 SV=1	65.772	587	0	0	0	0	0	620490	42497	617.13	0	0	0	0	0	0	0	0	0	2210.8
D4ABX9	D4ABX9		Emc6	>tr|D4ABX9|D4ABX9_RAT Protein Emc6 OS=Rattus norvegicus GN=Emc6 PE=4 SV=1	12.017	110	830370	3639600	19632000	61168000	32021000	44235000	386880	1846800	21313000	44811000	21226000	19493000	3716200	1658800	32539000	23998000	28418000	4571600
D4ABY2	D4ABY2	Coatomer subunit gamma	Copg2	>sp|D4ABY2|COPG2_RAT Coatomer subunit gamma-2 OS=Rattus norvegicus GN=Copg2 PE=3 SV=2	80.488	715	1166300	1861000	12948000	17750000	10562000	13499000	1059200	1039300	6722900	10398000	7471500	11021000	1195200	1220700	10285000	7926600	15700000	10522000
D4ABY4	D4ABY4		Ube2j1	>tr|D4ABY4|D4ABY4_RAT Protein Ube2j1 OS=Rattus norvegicus GN=Ube2j1 PE=4 SV=2	27.996	250	304250	758800	2893100	3865400	841550	1841400	405640	176410	1548900	2261600	2154700	4112800	151040	241870	5773500	3137600	6938000	977300
D4AC23	D4AC23		Cct7	>tr|D4AC23|D4AC23_RAT Protein Cct7 OS=Rattus norvegicus GN=Cct7 PE=3 SV=1	59.658	544	17605000	27598000	121940000	163120000	113890000	150100000	12537000	19822000	79378000	120230000	106910000	163930000	17699000	18748000	132470000	144710000	126910000	127610000
D4AC36	D4AC36		Eif3f	>tr|D4AC36|D4AC36_RAT Eukaryotic translation initiation factor 3, subunit 5 (Epsilon) (Predicted), isoform CRA_a OS=Rattus norvegicus GN=Eif3f PE=4 SV=2	24.549	239	11763000	13998000	35650000	63369000	28030000	64925000	7765800	6139600	36551000	52109000	47220000	31334000	10599000	8901300	56815000	54973000	82691000	20941000
D4AC38	D4AC38		Ago1	>tr|D4AC38|D4AC38_RAT Protein argonaute OS=Rattus norvegicus GN=Ago1 PE=3 SV=1	97.241	857	0	0	459750	547860	249080	563930	0	0	718150	1077700	429590	813640	0	0	232430	189700	322290	248650
D4AC45	D4AC45		Agpat2	>tr|D4AC45|D4AC45_RAT 1-acylglycerol-3-phosphate O-acyltransferase 2 (Lysophosphatidic acid acyltransferase, beta) (Predicted) OS=Rattus norvegicus GN=Agpat2 PE=4 SV=1	31.1	278	1156900	2973600	11053000	10502000	3167600	15801000	1175000	1267800	6489200	12101000	7787800	12720000	1316700	574750	8983800	11123000	14927000	2636700
D4AC62;CON__Q8N1A0	D4AC62;CON__Q8N1A0		RGD1560383	>tr|D4AC62|D4AC62_RAT Protein RGD1560383 OS=Rattus norvegicus GN=Krt222 PE=3 SV=1;>Q8N1A0 TREMBL:Q8N1A0 Tax_Id=9606 Gene_Symbol=KRT222P truncated type I keratin KA21	34.033	295	0	0	420550	441360	0	1559500	0	0	943640	537620	789740	0	0	0	591630	97275	1957500	13432
D4AC65	D4AC65		Selrc1	>tr|D4AC65|D4AC65_RAT Protein Selrc1 OS=Rattus norvegicus GN=Coa7 PE=4 SV=1	25.711	231	783470	870800	5770600	8458000	3757300	3558000	1168300	819940	12143000	21878000	4998000	4061700	428330	469570	8313700	16360000	8386400	663440
D4AC73	D4AC73		LOC684258	>tr|D4AC73|D4AC73_RAT Protein Chchd7 OS=Rattus norvegicus GN=Chchd7 PE=4 SV=2	10.101	85	501480	741420	3434000	8538500	7548900	6336500	654920	794250	2294500	11821000	4292800	4006500	528440	0	5072100	3896900	9968900	2060900
D4AC93;M0RAC5;M0RCL0	D4AC93;M0RAC5;M0RCL0		Tmem223;LOC100910452	>tr|D4AC93|D4AC93_RAT Protein Tmem223 OS=Rattus norvegicus GN=Tmem223 PE=4 SV=1;>tr|M0RAC5|M0RAC5_RAT Protein LOC100910452 (Fragment) OS=Rattus norvegicus GN=LOC100910452 PE=4 SV=1;>tr|M0RCL0|M0RCL0_RAT Protein LOC100910452 (Fragment) OS=Rattus norvegicus	21.673	199	65755	114570	357350	402150	238590	281770	114770	200000	223530	1040200	716250	622000	334690	33306	0	930000	925240	0
D4ACA2	D4ACA2		N6amt1	>tr|D4ACA2|D4ACA2_RAT Protein N6amt1 OS=Rattus norvegicus GN=N6amt1 PE=4 SV=1	22.916	214	0	64704	234640	0	628380	573180	0	28254	0	0	289340	577190	45833	61083	792730	965180	1226500	596860
D4ACA5	D4ACA5		LOC100911130	>tr|D4ACA5|D4ACA5_RAT Protein LOC100911130 OS=Rattus norvegicus GN=LOC100911130 PE=4 SV=1	18.377	172	2196000	4218900	18631000	29739000	22866000	24695000	2001200	2672400	14040000	34248000	17323000	21946000	2508900	1149600	17468000	14645000	25335000	1673400
D4ACB8	D4ACB8		Cct8	>tr|D4ACB8|D4ACB8_RAT Chaperonin subunit 8 (Theta) (Predicted), isoform CRA_a OS=Rattus norvegicus GN=Cct8 PE=3 SV=1	59.588	548	27533000	39744000	118590000	161080000	123410000	180070000	16719000	21118000	93005000	156150000	84228000	88323000	21766000	24436000	134320000	188680000	142990000	114380000
D4ACC2;D3ZD05	D4ACC2;D3ZD05		Kank2	>tr|D4ACC2|D4ACC2_RAT Protein Kank2 OS=Rattus norvegicus GN=Kank2 PE=4 SV=1;>tr|D3ZD05|D3ZD05_RAT Protein Kank2 OS=Rattus norvegicus GN=Kank2 PE=4 SV=1	90.008	836	0	65888	892090	1813900	596060	1031100	61159	52599	553150	1596200	173470	530220	79985	52575	1320700	728480	1011800	779530
D4ACD3	D4ACD3	Ubiquitin carboxyl-terminal hydrolase	Usp25	>tr|D4ACD3|D4ACD3_RAT Ubiquitin carboxyl-terminal hydrolase OS=Rattus norvegicus GN=Usp25 PE=3 SV=1	121.59	1055	0	0	0	0	0	76837	0	0	0	0	0	60734	0	0	0	0	0	0
D4ACF2	D4ACF2		Trim21	>tr|D4ACF2|D4ACF2_RAT Protein Trim21 OS=Rattus norvegicus GN=Trim21 PE=4 SV=2	54.126	471	168540	56337	203500	1894900	454260	0	29168	50019	1400700	1658600	963760	0	0	100460	1601000	724680	981020	0
D4ACG2	D4ACG2		Ilvbl	>tr|D4ACG2|D4ACG2_RAT IlvB (Bacterial acetolactate synthase)-like (Predicted), isoform CRA_c OS=Rattus norvegicus GN=Ilvbl PE=3 SV=1	72.269	672	2305300	4531900	15811000	33210000	9133800	25737000	3255400	1802100	19877000	32078000	18664000	25481000	2341200	1898500	30673000	17476000	18469000	19555000
D4ACG8	D4ACG8		Fuom	>tr|D4ACG8|D4ACG8_RAT Protein LOC100911225 OS=Rattus norvegicus GN=Fuom PE=4 SV=1	16.83	153	0	0	1455000	0	141170	422730	0	0	0	1044100	261070	902940	0	0	0	1023000	364160	99863
D4ACG9	D4ACG9		Abcg3	>tr|D4ACG9|D4ACG9_RAT Uncharacterized protein (Fragment) OS=Rattus norvegicus GN=Abcg3 PE=4 SV=2	30.903	268	2195600	5281300	19475000	25461000	5556200	15757000	1315600	1399700	7390400	13980000	8291500	8047700	1363600	452900	6012400	10425000	12782000	8408600
D4ACL2	D4ACL2		Ttc38	>tr|D4ACL2|D4ACL2_RAT Protein Ttc38 OS=Rattus norvegicus GN=Ttc38 PE=4 SV=1	52.15	465	3643800	4165500	16800000	27969000	8355700	17018000	4105200	4743600	24988000	42461000	18116000	15063000	2271800	8695600	23523000	24144000	21589000	13782000
D4ACM1	D4ACM1		Elp3	>tr|D4ACM1|D4ACM1_RAT Protein Elp3 OS=Rattus norvegicus GN=Elp3 PE=4 SV=1	64.071	566	112950	409270	1749400	4195600	3690300	2793400	138530	186610	1948900	3558700	2562700	1402000	254340	261110	4669800	2095000	2287200	3375000
D4ACN6	D4ACN6		Col4a3bp	>tr|D4ACN6|D4ACN6_RAT Procollagen, type IV, alpha 3 (Goodpasture antigen) binding protein (Predicted), isoform CRA_a OS=Rattus norvegicus GN=Col4a3bp PE=4 SV=2	71.068	624	120040	205450	460370	542770	729390	766090	124660	105800	100190	614900	676100	735900	119530	105970	1673300	1164800	752150	443370
D4ACN7	D4ACN7		Myof	>tr|D4ACN7|D4ACN7_RAT Protein Myof OS=Rattus norvegicus GN=Myof PE=4 SV=2	233.38	2048	0	0	0	0	0	0	0	0	0	0	0	35732	0	0	0	0	0	0
D4ACN8	D4ACN8	Plasminogen receptor (KT)	Plgrkt	>sp|D4ACN8|PLRKT_RAT Plasminogen receptor (KT) OS=Rattus norvegicus GN=Plgrkt PE=1 SV=1	17.312	147	521140	1515900	5820900	10669000	7326200	0	806930	848860	4336400	7800900	3035400	0	0	456130	5892700	4362000	0	0
D4ACP2	D4ACP2	Small integral membrane protein 12	Smim12	>sp|D4ACP2|SIM12_RAT Small integral membrane protein 12 OS=Rattus norvegicus GN=Smim12 PE=3 SV=1	10.809	92	0	0	628590	1912900	4773700	0	0	0	297380	1254300	456090	1496900	0	0	0	0	414010	0
D4ACU9	D4ACU9		Itga5	>tr|D4ACU9|D4ACU9_RAT Protein Itga5 (Fragment) OS=Rattus norvegicus GN=Itga5 PE=3 SV=2	119.3	1098	694830	752490	7046500	10253000	7361700	6343600	742710	415150	5346500	7349600	3839800	5041300	1111200	561500	6899200	6194400	7756400	3127300
D4ACV0	D4ACV0		Nelfb	>tr|D4ACV0|D4ACV0_RAT Protein Nelfb OS=Rattus norvegicus GN=Nelfb PE=4 SV=1	65.633	580	58736	47868	335750	859470	215720	0	80309	62069	419330	408050	258960	490940	49300	38087	496720	437330	455960	0
D4ACV3;P0CC09;P02262	D4ACV3;P0CC09;P02262	Histone H2A;Histone H2A type 2-A;Histone H2A type 1	Hist2h2ac;Hist2h2aa3	>tr|D4ACV3|D4ACV3_RAT Histone H2A OS=Rattus norvegicus GN=Hist2h2ac PE=3 SV=1;>sp|P0CC09|H2A2A_RAT Histone H2A type 2-A OS=Rattus norvegicus GN=Hist2h2aa3 PE=1 SV=1;>sp|P02262|H2A1_RAT Histone H2A type 1 OS=Rattus norvegicus PE=1 SV=2	13.988	129	19543000	39186000	139590000	135330000	96050000	153060000	29740000	8123000	50432000	137250000	45711000	35930000	48993000	3727700	278750000	76827000	83913000	35588000
D4ACW1	D4ACW1		Nop2	>tr|D4ACW1|D4ACW1_RAT Protein Nop2 OS=Rattus norvegicus GN=Nop2 PE=4 SV=2	84.969	772	42467	115490	122890	274480	221500	95230	34330	29068	62933	106650	0	0	139710	65891	100950	56913	0	114300
D4ACY1	D4ACY1		RGD1565784	>tr|D4ACY1|D4ACY1_RAT Protein RGD1565784 OS=Rattus norvegicus GN=RGD1565784 PE=4 SV=1	15.658	136	290980	979050	2373100	2047400	10171000	9901900	349170	664380	1802900	6002100	8686000	10506000	580610	294760	2630900	4789800	8425800	4005500
D4AD15;D3ZU13;M0RD03;F1LV74	D4AD15;D3ZU13		LOC680559;LOC100911431	>tr|D4AD15|D4AD15_RAT Protein LOC100911431 OS=Rattus norvegicus GN=Eif4g1 PE=4 SV=1;>tr|D3ZU13|D3ZU13_RAT Protein LOC100911431 OS=Rattus norvegicus GN=LOC100911431 PE=4 SV=1	174.96	1591	2921400	4903100	33003000	29571000	16504000	22724000	2764800	2350000	17240000	25926000	16911000	12693000	3825900	3226000	46721000	33933000	27660000	27958000
D4AD29	D4AD29		Lamtor4	>tr|D4AD29|D4AD29_RAT Protein Lamtor4 OS=Rattus norvegicus GN=Lamtor4 PE=4 SV=1	10.706	99	1740400	3576300	20227000	42590000	33791000	42700000	2370500	3148200	25284000	47786000	14841000	16770000	2481400	858940	31648000	8274900	32431000	3984300
D4AD33	D4AD33		Fam103a1	>tr|D4AD33|D4AD33_RAT Protein Fam103a1 OS=Rattus norvegicus GN=Fam103a1 PE=4 SV=1	14.414	119	0	0	675340	0	0	231240	0	0	0	205710	48276	0	0	0	1867900	0	0	0
D4AD48	D4AD48		Dcun1d2	>tr|D4AD48|D4AD48_RAT DCN1-like protein OS=Rattus norvegicus GN=Dcun1d2 PE=4 SV=1	30	259	437540	259880	0	0	0	0	0	205040	0	0	0	0	403730	140170	0	0	0	0
D4AD58	D4AD58		Lyrm5	>tr|D4AD58|D4AD58_RAT Protein Lyrm5 OS=Rattus norvegicus GN=Lyrm5 PE=4 SV=1	10.405	86	5082400	8212300	35477000	50064000	39494000	39222000	5498700	7932300	19390000	55259000	34112000	31882000	3269300	2061900	44986000	31985000	45965000	1086900
D4AD67;D4A4Z9;D4ADW6;D3ZI32;D4ADW5	D4AD67;D4A4Z9;D4ADW6;D3ZI32;D4ADW5		Ktn1	>tr|D4AD67|D4AD67_RAT Protein Ktn1 OS=Rattus norvegicus GN=Ktn1 PE=4 SV=2;>tr|D4A4Z9|D4A4Z9_RAT Protein Ktn1 OS=Rattus norvegicus GN=Ktn1 PE=4 SV=2;>tr|D4ADW6|D4ADW6_RAT Protein Ktn1 OS=Rattus norvegicus GN=Ktn1 PE=4 SV=2;>tr|D3ZI32|D3ZI32_RAT Protein Ktn1	145.83	1273	360030	342040	3429300	5133000	4139600	3334900	386640	438920	3339200	4640000	2233000	3698500	400350	180080	5751600	6355700	6863600	2633700
D4AD75	D4AD75		Dpy19l1	>tr|D4AD75|D4AD75_RAT Protein Dpy19l1 OS=Rattus norvegicus GN=Dpy19l1 PE=4 SV=1	84.363	746	112180	32549	902420	641090	0	1183600	223680	145330	321640	428090	464910	359900	196970	14878	360190	486230	454040	423980
D4AD82;P81128;D4A814	D4AD82;P81128	Rho GTPase-activating protein 35	Arhgap35	>tr|D4AD82|D4AD82_RAT Rho GTPase-activating protein 35 OS=Rattus norvegicus GN=Arhgap35 PE=4 SV=2;>sp|P81128|RHG35_RAT Rho GTPase-activating protein 35 OS=Rattus norvegicus GN=Arhgap35 PE=1 SV=2	145.64	1278	45151	41723	990020	148970	287690	49314	9932.7	9321.8	144250	226410	63394	40239	40832	0	459910	752570	201440	103940
D4AD91	D4AD91		RGD1560289	>tr|D4AD91|D4AD91_RAT Protein RGD1560289 OS=Rattus norvegicus GN=RGD1560289 PE=4 SV=2	100.58	902	0	0	0	14831000	0	56286	0	0	2517000	4820100	24405	0	0	0	61918000	0	0	0
D4ADB4	D4ADB4		Cggbp1	>tr|D4ADB4|D4ADB4_RAT CGG triplet repeat binding protein 1 (Predicted) OS=Rattus norvegicus GN=Cggbp1 PE=4 SV=1	18.82	167	0	0	562400	354200	0	479050	0	0	683730	155310	258960	0	0	0	0	0	35701	0
D4ADC2	D4ADC2		Pric285	>tr|D4ADC2|D4ADC2_RAT Protein Helz2 OS=Rattus norvegicus GN=Helz2 PE=4 SV=1	331.6	2944	81452	155550	2453700	2073200	287610	1695800	18728	143160	1133600	1215700	530620	1152000	86294	10076	1425800	1095200	713240	216460
D4ADC3	D4ADC3		Mgst2	>tr|D4ADC3|D4ADC3_RAT Protein Mgst2 OS=Rattus norvegicus GN=Mgst2 PE=4 SV=2	16.722	147	9212400	16023000	87275000	63234000	30830000	98889000	10315000	11386000	40323000	120100000	57781000	81351000	14398000	2492000	80737000	158800000	159600000	17013000
D4ADD7	D4ADD7		Glrx5	>tr|D4ADD7|D4ADD7_RAT Glutaredoxin 5 homolog (S. cerevisiae) (Predicted), isoform CRA_b OS=Rattus norvegicus GN=Glrx5 PE=4 SV=1	16.432	152	11905000	16044000	79625000	93757000	130100000	110720000	19420000	20330000	67801000	186970000	78850000	92328000	16146000	12193000	97375000	78860000	102030000	29176000
D4ADD8	D4ADD8		Dctn6	>tr|D4ADD8|D4ADD8_RAT Dynactin 6 (Predicted), isoform CRA_b OS=Rattus norvegicus GN=Dctn6 PE=4 SV=1	20.666	190	0	0	4466600	3503500	1392500	3723900	0	0	2264000	4090500	2027800	1531300	0	0	5615100	5229300	2693100	141280
D4ADE8	D4ADE8		Ddx3x	>tr|D4ADE8|D4ADE8_RAT DEAD/H (Asp-Glu-Ala-Asp/His) box polypeptide 3, X-linked OS=Rattus norvegicus GN=Ddx3x PE=4 SV=2	34.341	311	1846000	2666700	7402400	14512000	5773000	10333000	1822000	1550600	6575600	10930000	6393200	5730500	1861000	1331300	14878000	8220500	8129200	8832400
D4ADF5;B1H286	D4ADF5		LOC100912106	>tr|D4ADF5|D4ADF5_RAT Protein LOC100912106 OS=Rattus norvegicus GN=Pdcd5 PE=4 SV=1	14.204	125	3283400	6452300	27435000	46630000	32707000	30979000	2523300	3954300	20504000	33411000	17093000	21128000	3645700	2653600	30278000	31906000	37215000	13080000
D4ADG2;M0R817	D4ADG2;M0R817		Iba57;LOC100912081	>tr|D4ADG2|D4ADG2_RAT Protein Iba57 OS=Rattus norvegicus GN=Iba57 PE=3 SV=1;>tr|M0R817|M0R817_RAT Protein LOC100912081 (Fragment) OS=Rattus norvegicus GN=LOC100912081 PE=4 SV=1	38.673	358	6411700	9799700	27600000	48228000	20495000	32347000	4867300	8952300	39599000	61174000	48047000	36506000	4063800	5040100	45318000	32818000	62819000	52984000
D4ADJ6	D4ADJ6		Amfr	>tr|D4ADJ6|D4ADJ6_RAT Protein Amfr (Fragment) OS=Rattus norvegicus GN=Amfr PE=4 SV=2	71.198	630	237690	404980	4063300	5073600	1524400	4090400	97828	132460	944800	4734900	3286300	3210200	481500	212080	5457000	3108800	7851200	3677600
D4ADJ7	D4ADJ7		Med11	>tr|D4ADJ7|D4ADJ7_RAT Protein Med11 OS=Rattus norvegicus GN=Med11 PE=4 SV=1	15.362	135	0	0	0	1202700	287960	0	0	0	0	843860	0	0	0	0	323350	496000	1087900	16448
D4ADL1	D4ADL1			>tr|D4ADL1|D4ADL1_RAT Uncharacterized protein OS=Rattus norvegicus PE=4 SV=2	13.129	122	2181100	2341900	1010200	720240	0	4465400	2344000	3964500	0	0	0	1809000	1257600	1853700	0	0	0	0
D4ADM8	D4ADM8		Rhod	>tr|D4ADM8|D4ADM8_RAT Protein Rhod OS=Rattus norvegicus GN=Rhod PE=3 SV=1	23.682	210	2397800	3529700	11782000	11359000	7191300	9469200	1298100	1848700	7441100	14883000	4460600	8532600	1345600	1147700	11483000	12248000	7647400	0
D4ADP9	D4ADP9		Copz2	>tr|D4ADP9|D4ADP9_RAT Coatomer protein complex, subunit zeta 2 (Predicted), isoform CRA_a OS=Rattus norvegicus GN=Copz2 PE=4 SV=2	23.267	207	1579000	2618400	12757000	15310000	8240400	15686000	786170	1951600	11867000	16000000	7029100	15345000	1352400	1277600	14776000	9574400	19853000	1704200
D4ADS4;D3ZZQ8	D4ADS4;D3ZZQ8		Mgst3;RGD1561381	>tr|D4ADS4|D4ADS4_RAT Protein Mgst3 OS=Rattus norvegicus GN=Mgst3 PE=4 SV=1;>tr|D3ZZQ8|D3ZZQ8_RAT Protein RGD1561381 OS=Rattus norvegicus GN=RGD1561381 PE=4 SV=1	16.732	152	18128000	43866000	193980000	210720000	102900000	267750000	41631000	37190000	172800000	217120000	178820000	208240000	35499000	8232200	141870000	260730000	293890000	23659000
D4ADS6	D4ADS6		Ints7	>tr|D4ADS6|D4ADS6_RAT Protein Ints7 OS=Rattus norvegicus GN=Ints7 PE=4 SV=1	106.91	967	0	0	0	132790	92473	152700	0	0	0	57135	97893	159580	0	0	112770	46564	191240	39780
D4ADS9	D4ADS9		Efr3a	>tr|D4ADS9|D4ADS9_RAT Protein Efr3a OS=Rattus norvegicus GN=Efr3a PE=1 SV=1	92.523	819	55737	61603	1426300	367370	502400	473080	87850	97471	1419100	473390	268540	730640	61285	34307	1542100	821390	734800	465540
D4ADT5	D4ADT5		Ddx58	>tr|D4ADT5|D4ADT5_RAT Protein Ddx58 OS=Rattus norvegicus GN=Ddx58 PE=4 SV=2	68.345	598	2079100	2508500	23499000	10711000	9701200	11107000	1917500	1742900	17980000	13513000	12469000	10536000	1599800	1678500	23034000	10216000	15429000	10422000
D4ADV6;P97924-7;F1LZV1;P97924;P97924-4;Q6P720;P97924-8;F1M4V6;P97924-6;P97924-3;P97924-2	D4ADV6;P97924-7;F1LZV1;P97924;P97924-4	Kalirin	Kalrn	>tr|D4ADV6|D4ADV6_RAT Kalirin (Fragment) OS=Rattus norvegicus GN=Kalrn PE=4 SV=2;>sp|P97924-7|KALRN_RAT Isoform 7 of Kalirin OS=Rattus norvegicus GN=Kalrn;>tr|F1LZV1|F1LZV1_RAT Kalirin (Fragment) OS=Rattus norvegicus GN=Kalrn PE=4 SV=2;>sp|P97924|KALRN_RAT	263.92	2308	0	0	0	0	0	0	0	0	0	0	0	0	0	0	1519600	0	0	147670
D4ADZ9	D4ADZ9		Pus7	>tr|D4ADZ9|D4ADZ9_RAT Protein Pus7 OS=Rattus norvegicus GN=Pus7 PE=4 SV=2	74.64	660	14106	30192	437140	465320	175920	441960	0	16148	330120	200510	265600	0	66601	55443	830100	457440	131950	0
D4AE00	D4AE00		Ap3b2	>tr|D4AE00|D4AE00_RAT Protein Ap3b2 OS=Rattus norvegicus GN=Ap3b2 PE=4 SV=1	119.14	1082	0	0	188750	420740	82425	0	0	0	0	1226500	211970	599620	0	0	1300200	1059700	349380	379650
D4AE02	D4AE02		Fam98b	>tr|D4AE02|D4AE02_RAT Protein Fam98b OS=Rattus norvegicus GN=Fam98b PE=4 SV=2	46.296	431	885610	1037100	4631400	6397200	3118300	4477100	1053700	1923100	5444300	10094000	3792000	3170900	1048100	906990	7710800	7769100	4507900	2073100
D4AE03	D4AE03		Engase	>tr|D4AE03|D4AE03_RAT Protein Engase OS=Rattus norvegicus GN=Engase PE=4 SV=1	83.066	732	258870	559200	4097100	6517900	2396400	3236800	230380	416730	3743900	4436600	2963700	3573100	312150	282730	2861900	3321700	2649400	2505100
D4AE06;D3ZR68;D4A6E5;M0RDY5	D4AE06;D3ZR68;D4A6E5	Peptidyl-prolyl cis-trans isomerase	Fkbp15	>tr|D4AE06|D4AE06_RAT Peptidyl-prolyl cis-trans isomerase (Fragment) OS=Rattus norvegicus GN=Fkbp15 PE=4 SV=2;>tr|D3ZR68|D3ZR68_RAT Peptidyl-prolyl cis-trans isomerase (Fragment) OS=Rattus norvegicus GN=Fkbp15 PE=4 SV=2;>tr|D4A6E5|D4A6E5_RAT Peptidyl-proly	131.36	1197	0	74094	686090	378950	264110	289410	0	0	0	294240	394700	452140	21400	0	682530	814860	436290	414640
D4AE08	D4AE08		Fam206a	>tr|D4AE08|D4AE08_RAT Protein Fam206a OS=Rattus norvegicus GN=Fam206a PE=4 SV=1	21.509	193	0	0	1563700	1406500	0	2326600	0	160730	1449100	3596900	1609600	3133900	133550	82637	1294400	2673800	3461700	561960
D4AE09	D4AE09		Cyp39a1	>tr|D4AE09|D4AE09_RAT Cytochrome P450, family 39, subfamily a, polypeptide 1 (Predicted), isoform CRA_a OS=Rattus norvegicus GN=Cyp39a1 PE=4 SV=1	53.338	465	3704000	10749000	14689000	39124000	9292200	26762000	2818300	6814400	7038700	26608000	24804000	14754000	4130900	1467700	31429000	21240000	27274000	25948000
D4AE18;D4AE17	D4AE18;D4AE17		Zak	>tr|D4AE18|D4AE18_RAT Protein Zak OS=Rattus norvegicus GN=Zak PE=4 SV=2;>tr|D4AE17|D4AE17_RAT Protein Zak OS=Rattus norvegicus GN=Zak PE=4 SV=1	91.765	802	0	0	0	0	228940	208420	0	0	0	358600	240940	306950	0	0	273870	179150	175170	387920
D4AE35	D4AE35			>tr|D4AE35|D4AE35_RAT Sulfotransferase OS=Rattus norvegicus PE=3 SV=1	32.292	276	0	0	0	436780	0	0	0	0	336040	228380	192510	208130	0	0	287150	61844	147660	326570
D4AE49	D4AE49		Skiv2l2	>tr|D4AE49|D4AE49_RAT Protein Skiv2l2 (Fragment) OS=Rattus norvegicus GN=Skiv2l2 PE=4 SV=2	103.32	908	172230	715280	1262400	1998300	1305200	1914900	181640	314940	2060400	3901200	1434700	2517800	375360	420210	2344300	2354200	3438900	1384000
D4AE56	D4AE56		Ptges2	>tr|D4AE56|D4AE56_RAT Prostaglandin E synthase 2 (Predicted), isoform CRA_b OS=Rattus norvegicus GN=Ptges2 PE=3 SV=1	43.451	384	4422200	4644100	23081000	26884000	4557800	31176000	4404200	6945800	26755000	48392000	19391000	27870000	3039500	3083400	34092000	27004000	26873000	31105000
D4AE58	D4AE58		Kank1	>tr|D4AE58|D4AE58_RAT Protein Kank1 OS=Rattus norvegicus GN=Kank1 PE=4 SV=1	147.47	1353	0	0	0	0	123090	73643	0	0	0	0	0	58347	0	0	0	0	112570	147710
D4AE88	D4AE88		Fam120b	>tr|D4AE88|D4AE88_RAT Protein Fam120b OS=Rattus norvegicus GN=Fam120b PE=4 SV=1	88.764	785	21902	61119	626070	681580	121510	1197500	73838	0	403320	640110	220930	839230	110000	48656	823690	267760	918160	264910
D4AE90	D4AE90		Wbscr16	>tr|D4AE90|D4AE90_RAT Protein Wbscr16 OS=Rattus norvegicus GN=Wbscr16 PE=4 SV=1	50.113	461	0	0	425770	2656200	663180	358540	0	0	0	1348800	1106600	1666000	0	0	556040	318600	1273000	739150
D4AE96	D4AE96		Ipo7	>tr|D4AE96|D4AE96_RAT Importin 7 (Predicted), isoform CRA_c OS=Rattus norvegicus GN=Ipo7 PE=4 SV=1	119.49	1038	869240	2528700	16098000	13529000	4160600	17360000	1260700	1325000	17813000	12180000	7832700	9293300	2300800	1755200	21382000	24007000	37411000	11671000
D4AED6;F1M3Y3	D4AED6		RGD1307782	>tr|D4AED6|D4AED6_RAT Protein RGD1307782 OS=Rattus norvegicus GN=Wbscr27 PE=4 SV=1	27.398	253	2225900	7592600	11614000	14858000	16986000	15291000	3091600	9488100	9182400	20598000	8147300	16205000	2054900	2644000	5325500	20528000	4213300	6785900
D4AEE9	D4AEE9		Elof1	>tr|D4AEE9|D4AEE9_RAT Protein Elof1 OS=Rattus norvegicus GN=Elof1 PE=4 SV=1	9.4618	83	0	0	3359400	0	0	0	0	0	3647600	3270200	0	0	0	0	0	1302500	0	0
D4AEG2	D4AEG2		Rab32	>tr|D4AEG2|D4AEG2_RAT Protein Rab32 OS=Rattus norvegicus GN=Rab32 PE=3 SV=1	25.26	223	268160	302120	759030	757460	227360	874420	274100	268750	916830	1039500	31704	7192	267610	98120	1369500	705630	126900	0
D4AEG6	D4AEG6		Mrpl32	>tr|D4AEG6|D4AEG6_RAT Mitochondrial ribosomal protein L32 (Predicted) OS=Rattus norvegicus GN=Mrpl32 PE=4 SV=1	21.601	187	176760	307110	6443800	9150600	10884000	5822800	241590	337360	2800300	13088000	6048900	7189500	309600	221310	7509000	7524700	13018000	156790
D4AEG7	D4AEG7		Tbc1d13	>tr|D4AEG7|D4AEG7_RAT Protein Tbc1d13 (Fragment) OS=Rattus norvegicus GN=Tbc1d13 PE=4 SV=2	45.705	393	735570	1004100	4881100	6276200	2761000	4259500	518380	855880	3521100	5986400	3305700	4118900	716490	784170	4105000	3096800	3814800	1229600
D4AEH3	D4AEH3		Psmd7	>tr|D4AEH3|D4AEH3_RAT Proteasome (Prosome, macropain) 26S subunit, non-ATPase, 7 (Predicted) OS=Rattus norvegicus GN=Psmd7 PE=4 SV=1	36.491	320	7306500	11511000	37302000	48694000	46277000	55902000	9849000	13900000	22920000	51385000	40600000	33727000	10321000	12935000	83979000	75535000	65784000	108740000
D4AEH9	D4AEH9		Agl	>tr|D4AEH9|D4AEH9_RAT Amylo-1, 6-glucosidase, 4-alpha-glucanotransferase (Glycogen debranching enzyme, glycogen storage disease type III) (Predicted), isoform CRA_a OS=Rattus norvegicus GN=Agl PE=4 SV=1	174.33	1532	7647700	10153000	72111000	61734000	42991000	48362000	9234800	11751000	75890000	72969000	41490000	43934000	7948100	4385100	66368000	53033000	67365000	39695000
D4AEJ6	D4AEJ6		Pex11g	>tr|D4AEJ6|D4AEJ6_RAT Peroxisomal biogenesis factor 11c (Predicted), isoform CRA_b OS=Rattus norvegicus GN=Pex11g PE=4 SV=1	26.865	241	24703	813600	2258800	2942500	284130	4318400	115560	293120	970470	4466900	2909000	3799500	383480	263930	5929900	2471800	6133700	0
D4AEK6	D4AEK6		Prss29	>tr|D4AEK6|D4AEK6_RAT Protein Prss29 OS=Rattus norvegicus GN=Prss29 PE=3 SV=1	30.579	279	0	0	0	164780	0	0	0	0	0	0	0	0	0	0	588650	0	0	0
D4AEL0	D4AEL0		LOC691083	>tr|D4AEL0|D4AEL0_RAT Protein LOC691083 OS=Rattus norvegicus GN=LOC691083 PE=4 SV=1	22.447	199	2547000	6479300	17274000	31635000	9860900	23093000	2798800	3057500	15628000	26074000	17175000	21719000	2190100	1033600	0	16312000	19393000	0
D4AEL3	D4AEL3		RGD1309148	>tr|D4AEL3|D4AEL3_RAT Protein RGD1309148 OS=Rattus norvegicus GN=Tmem261 PE=4 SV=2	11.417	111	1405400	2503600	11555000	19913000	7206700	4292600	2261300	2197700	6351900	37117000	7908300	5967000	1880700	1058400	19872000	17455000	6546300	1441600
D4AEP0	D4AEP0	Adenylosuccinate synthetase isozyme 2	Adss	>tr|D4AEP0|D4AEP0_RAT Adenylosuccinate synthetase isozyme 2 OS=Rattus norvegicus GN=Adss PE=3 SV=1	50.085	456	6492500	5702100	43906000	46366000	21823000	31417000	4112800	4201100	27515000	75858000	24366000	26797000	4260200	5612800	53092000	30345000	26658000	25502000
E2RUH2;P29315	E2RUH2;P29315	Ribonuclease inhibitor	LOC100360501;Rnh1	>tr|E2RUH2|E2RUH2_RAT Ribonuclease inhibitor OS=Rattus norvegicus GN=Rnh1 PE=2 SV=1;>sp|P29315|RINI_RAT Ribonuclease inhibitor OS=Rattus norvegicus GN=Rnh1 PE=1 SV=2	49.919	456	27156000	40719000	151500000	182590000	98244000	136230000	20088000	20843000	138880000	175190000	118380000	97188000	11823000	26927000	174460000	160700000	146790000	144810000
E9PSJ1	E9PSJ1		St3gal1	>tr|E9PSJ1|E9PSJ1_RAT Protein St3gal1 OS=Rattus norvegicus GN=St3gal1 PE=4 SV=1	39.321	340	0	318880	2211600	3051300	0	3578100	0	68627	1083000	2483100	199110	357730	25810	77532	2917800	2491100	1549200	362580
E9PSJ4;E9PSK7	E9PSJ4		Spag9	>tr|E9PSJ4|E9PSJ4_RAT Protein Spag9 OS=Rattus norvegicus GN=Spag9 PE=4 SV=2	146	1320	38217	158450	1971200	455640	147090	766030	39404	51939	1094200	1108200	276230	1190200	36346	20145	1850000	787310	780140	311000
E9PSK0	E9PSK0		Man2b2	>tr|E9PSK0|E9PSK0_RAT Protein Man2b2 OS=Rattus norvegicus GN=Man2b2 PE=4 SV=1	112.27	981	0	0	0	111520	194390	52836	0	0	134520	144820	94636	68887	0	0	41215	52470	143950	0
E9PSK3	E9PSK3	Beta-galactosidase	Bin2a	>tr|E9PSK3|E9PSK3_RAT Beta-galactosidase OS=Rattus norvegicus GN=Bin2a PE=3 SV=1	72.811	637	0	0	0	0	0	343900	0	0	0	0	0	360580	0	0	0	0	0	0
E9PSQ1;CON__Q3MHH8	E9PSQ1		Amy1a	>tr|E9PSQ1|E9PSQ1_RAT Alpha-amylase OS=Rattus norvegicus GN=Amy1a PE=3 SV=2	58.772	520	365340	344230	1709000	1545100	1787900	1272700	460890	457450	866640	262460	574370	588990	89032	0	358250	269850	819240	880040
E9PSR7;M0R6W5	E9PSR7;M0R6W5			>tr|E9PSR7|E9PSR7_RAT Uncharacterized protein (Fragment) OS=Rattus norvegicus PE=4 SV=2;>tr|M0R6W5|M0R6W5_RAT Uncharacterized protein (Fragment) OS=Rattus norvegicus PE=4 SV=1	118.03	1030	225150	347100	2240500	3971700	30749	1939200	298190	258650	2814000	4488400	1620600	1765400	197900	111280	2753000	1589600	1913100	943770
E9PSS2;Q9JK72	E9PSS2;Q9JK72	Superoxide dismutase [Cu-Zn];Copper chaperone for superoxide dismutase	Ccs	>tr|E9PSS2|E9PSS2_RAT Superoxide dismutase [Cu-Zn] OS=Rattus norvegicus GN=Ccs PE=3 SV=1;>sp|Q9JK72|CCS_RAT Copper chaperone for superoxide dismutase OS=Rattus norvegicus GN=Ccs PE=1 SV=1	23.983	228	3228700	7510300	20543000	34778000	21850000	15376000	4990200	5667200	36050000	45633000	13101000	18787000	2534000	4560800	45949000	19426000	16136000	11814000
E9PSS8;D3ZQG9;D3ZKI0;M0RBQ7;F1M9F3;M0R8N4;F7F5U0;Q6MFY2;M0R642;G3V627;F1M115;Q6MG38;D3ZKH0;F1LQF2;M0R866;Q4G002;E9PSW1;Q6MG01	E9PSS8;D3ZQG9;D3ZKI0		RT1-A1;RT1-CE2;RT1-CE16	>tr|E9PSS8|E9PSS8_RAT Protein RT1-A1 OS=Rattus norvegicus GN=RT1-A1 PE=3 SV=2;>tr|D3ZQG9|D3ZQG9_RAT Protein RT1-CE2 (Fragment) OS=Rattus norvegicus GN=RT1-CE2 PE=3 SV=2;>tr|D3ZKI0|D3ZKI0_RAT Uncharacterized protein OS=Rattus norvegicus GN=RT1-CE16 PE=1 SV=	35.286	308	2363600	0	16702000	19337000	12764000	8108400	0	2895700	16714000	23215000	533150	5245200	315990	779350	12092000	305230	1162900	5867300
E9PST0	E9PST0		38231	>tr|E9PST0|E9PST0_RAT Protein Sept4 OS=Rattus norvegicus GN=Sept4 PE=3 SV=2	37.548	326	160040	253710	1261000	2981700	109350	1703400	170260	250480	2026600	1376100	584880	41152	131660	137150	889370	816290	666640	0
E9PST1	E9PST1		RGD1310507	>tr|E9PST1|E9PST1_RAT Protein RGD1310507 OS=Rattus norvegicus GN=RGD1310507 PE=4 SV=2	50.86	462	1600500	2563000	20099000	49703000	29144000	41875000	2121800	1959500	40852000	33158000	26561000	29712000	2291000	3309400	29879000	42636000	47915000	31099000
E9PST5	E9PST5		Acin1	>tr|E9PST5|E9PST5_RAT Protein Acin1 OS=Rattus norvegicus GN=Acin1 PE=1 SV=1	151.04	1339	0	0	49541	352740	233010	305030	0	31566	0	841850	135360	476160	0	0	268660	1073700	172060	197510
E9PSV5	E9PSV5		Psat1	>tr|E9PSV5|E9PSV5_RAT Phosphoserine aminotransferase OS=Rattus norvegicus GN=Psat1 PE=3 SV=2	40.49	370	7468000	11876000	33162000	74543000	23082000	105950000	3062100	3007900	24667000	13711000	25060000	26079000	2118900	2123200	23146000	42849000	43299000	24695000
E9PSX3;F7ERG5;P15978	E9PSX3;F7ERG5;P15978	Class I histocompatibility antigen, Non-RT1.A alpha-1 chain	RT1-A;RT1-Aw2	>tr|E9PSX3|E9PSX3_RAT Protein RT1-A OS=Rattus norvegicus GN=RT1-A PE=3 SV=2;>tr|F7ERG5|F7ERG5_RAT Protein RT1-A (Fragment) OS=Rattus norvegicus GN=RT1-A PE=3 SV=1;>sp|P15978|HA11_RAT Class I histocompatibility antigen, Non-RT1.A alpha-1 chain OS=Rattus nor	40.555	358	1010800	1756500	11640000	2169600	2105600	9880000	1774900	1505600	1440400	26993000	13870000	12275000	482600	1036900	16436000	1877800	12354000	12604000
E9PSY8	E9PSY8		Eps15	>tr|E9PSY8|E9PSY8_RAT Protein Eps15 OS=Rattus norvegicus GN=Eps15 PE=4 SV=1	86.701	792	1027600	1692000	2012100	2579400	731720	2342700	1060200	1279700	1840300	1698600	1148600	2724500	293310	1156100	1661300	1144400	4152100	1002800
E9PSZ7	E9PSZ7		Cyp2t1	>tr|E9PSZ7|E9PSZ7_RAT Protein Cyp2t1 OS=Rattus norvegicus GN=Cyp2t1 PE=3 SV=1	56.111	495	2637600	1389200	22082000	18229000	10707000	17973000	1014200	1796500	6135200	15188000	18754000	5387200	581740	623540	6723400	18611000	11599000	10286000
E9PT23	E9PT23		Slc38a10	>tr|E9PT23|E9PT23_RAT Protein Slc38a10 OS=Rattus norvegicus GN=Slc38a10 PE=4 SV=1	117.42	1084	0	0	904210	467540	0	133410	0	0	155400	298780	378480	205350	0	0	419980	111920	107560	56676
E9PT29	E9PT29			>tr|E9PT29|E9PT29_RAT Uncharacterized protein OS=Rattus norvegicus PE=3 SV=2	47.385	418	1455000	3033600	6249900	2784200	7710100	7109400	1358000	1479900	3533500	3392500	3863800	1729800	1111900	892370	7230600	3575300	2485600	4761900
E9PT53	E9PT53		Wfs1	>tr|E9PT53|E9PT53_RAT Protein Wfs1 OS=Rattus norvegicus GN=Wfs1 PE=4 SV=2	100.56	890	17202	8542.7	127960	203370	193050	389860	10308	5402.1	69329	161530	74103	244400	10808	10196	192620	0	395220	187470
E9PT65	E9PT65		Rdx	>tr|E9PT65|E9PT65_RAT Protein Rdx OS=Rattus norvegicus GN=Rdx PE=4 SV=1	68.39	582	18877000	26098000	127220000	158210000	128130000	118700000	18305000	20874000	146150000	215310000	135640000	125450000	12300000	13717000	137490000	173190000	149030000	115570000
E9PT66	E9PT66		Sf3b3	>tr|E9PT66|E9PT66_RAT Protein Sf3b3 OS=Rattus norvegicus GN=Sf3b3 PE=4 SV=2	135.55	1217	1069100	1911700	9230700	12237000	1665800	5478900	1632300	1685300	7369000	11898000	3992100	4841600	998930	555770	7284700	8079700	6378200	4726300
E9PT68	E9PT68		Mier1	>tr|E9PT68|E9PT68_RAT Protein Mier1 OS=Rattus norvegicus GN=Mier1 PE=4 SV=1	57.943	512	0	0	0	0	0	576650	0	0	0	0	140890	151490	0	0	354490	0	278640	279680
E9PT82;P58405-2;P58405	E9PT82;P58405-2;P58405	Striatin-3	Strn3	>tr|E9PT82|E9PT82_RAT Striatin-3 OS=Rattus norvegicus GN=Strn3 PE=4 SV=1;>sp|P58405-2|STRN3_RAT Isoform 2 of Striatin-3 OS=Rattus norvegicus GN=Strn3;>sp|P58405|STRN3_RAT Striatin-3 OS=Rattus norvegicus GN=Strn3 PE=2 SV=2	77.628	710	0	0	1115400	666110	656090	1249400	0	0	753740	908290	0	458460	0	0	1105500	793350	337490	340270
E9PT90	E9PT90		Spg20	>tr|E9PT90|E9PT90_RAT Protein Spg20 OS=Rattus norvegicus GN=Spg20 PE=4 SV=2	64.761	596	0	0	1667900	0	1448400	1544300	0	0	687090	482420	1403600	1640000	0	0	928710	1494100	1183400	2462200
E9PT91	E9PT91		Alg8	>tr|E9PT91|E9PT91_RAT Protein Alg8 OS=Rattus norvegicus GN=Alg8 PE=4 SV=1	59.712	526	0	0	1572900	2564100	30336	2626900	0	0	975520	1560000	1350100	546970	0	0	1467700	0	2366300	1161200
E9PTA5	E9PTA5		Pign	>tr|E9PTA5|E9PTA5_RAT Protein Pign OS=Rattus norvegicus GN=Pign PE=4 SV=2	105.17	931	251240	730590	2117200	5320900	161520	3306300	181900	117610	1742300	7760500	2754300	2397400	157500	42160	1769900	2249300	4139600	541880
E9PTB7	E9PTB7		Ptprj	>tr|E9PTB7|E9PTB7_RAT Protein Ptprj OS=Rattus norvegicus GN=Ptprj PE=4 SV=2	134.39	1216	8950.9	0	1334500	1207200	299500	1471800	12519	3093.9	969810	1302000	389840	1265500	16920	13793	1344100	2471900	1722100	472350
E9PTD2;O55012-2;O55012	E9PTD2;O55012-2;O55012	Phosphatidylinositol-binding clathrin assembly protein	Picalm	>tr|E9PTD2|E9PTD2_RAT Phosphatidylinositol-binding clathrin assembly protein OS=Rattus norvegicus GN=Picalm PE=4 SV=2;>sp|O55012-2|PICAL_RAT Isoform 2 of Phosphatidylinositol-binding clathrin assembly protein OS=Rattus norvegicus GN=Picalm;>sp|O55012|PICAL	64.647	597	2390200	3615700	14146000	22512000	17845000	24449000	3900300	3935100	15457000	20514000	10666000	11764000	2324700	2225200	26844000	19709000	23867000	15324000
E9PTE1;F1MAQ7	E9PTE1;F1MAQ7		Son	>tr|E9PTE1|E9PTE1_RAT Protein Son OS=Rattus norvegicus GN=Son PE=4 SV=2;>tr|F1MAQ7|F1MAQ7_RAT Protein Son OS=Rattus norvegicus GN=Son PE=4 SV=2	252.64	2323	0	0	0	39633	17924	46481	0	0	0	49539	0	0	0	0	43693	34352	0	24032
E9PTF9;Q5BJU7	E9PTF9		Wasf2	>tr|E9PTF9|E9PTF9_RAT Protein Wasf2 OS=Rattus norvegicus GN=Wasf2 PE=4 SV=2	54.213	499	337150	462860	2645800	1183300	1470900	688800	442350	346120	1593300	2195300	609840	582030	358100	40522	1347800	2081100	659490	21772
E9PTG1;Q8K1P7;G3V790	E9PTG1;Q8K1P7;G3V790	Transcription activator BRG1	Smarca2;Smarca4	>tr|E9PTG1|E9PTG1_RAT Protein Smarca2 OS=Rattus norvegicus GN=Smarca2 PE=4 SV=1;>sp|Q8K1P7|SMCA4_RAT Transcription activator BRG1 OS=Rattus norvegicus GN=Smarca4 PE=1 SV=1;>tr|G3V790|G3V790_RAT Transcription activator BRG1 OS=Rattus norvegicus GN=Smarca4 P	182.35	1597	0	0	30324	128390	367660	297320	0	0	54360	355380	16516	288940	0	0	162670	206810	277470	185640
E9PTH4	E9PTH4		Gltpd2	>tr|E9PTH4|E9PTH4_RAT Protein Gltpd2 OS=Rattus norvegicus GN=Gltpd2 PE=4 SV=1	35.895	329	98372	458530	3590900	4109100	2279900	2498100	206530	209930	787800	2716000	2023700	3095400	681900	678820	6194100	7736600	6263000	4146100
E9PTI1	E9PTI1		Atp6v1h	>tr|E9PTI1|E9PTI1_RAT Protein Atp6v1h OS=Rattus norvegicus GN=Atp6v1h PE=4 SV=1	50.825	441	925090	900660	6328300	12537000	3870100	6616300	1502900	1225900	7222500	13265000	5201700	5348500	1196800	632930	10248000	8926000	7312000	8194400
E9PTI6	E9PTI6		Raly	>tr|E9PTI6|E9PTI6_RAT Protein Raly OS=Rattus norvegicus GN=Raly PE=4 SV=1	30.006	285	858330	1517200	6103900	6233100	931150	2361200	1138300	2631600	9222200	18718000	3884400	8094400	1533600	428140	8612300	2854100	1131200	184920
E9PTJ8;Q9Z1I6	E9PTJ8;Q9Z1I6	Rho guanine nucleotide exchange factor 1	Arhgef1	>tr|E9PTJ8|E9PTJ8_RAT Rho guanine nucleotide exchange factor 1 OS=Rattus norvegicus GN=Arhgef1 PE=4 SV=2;>sp|Q9Z1I6|ARHG1_RAT Rho guanine nucleotide exchange factor 1 OS=Rattus norvegicus GN=Arhgef1 PE=1 SV=1	102.7	918	84886	221050	2082500	1823400	4733500	3064300	117760	111450	1131600	3081200	2898200	3953200	166960	206570	2836000	3654700	4615500	5989300
E9PTK4	E9PTK4		Thnsl1	>tr|E9PTK4|E9PTK4_RAT Protein Thnsl1 OS=Rattus norvegicus GN=Thnsl1 PE=3 SV=1	82.709	745	307880	236930	673330	1246500	683070	1109100	234060	280580	966970	1511900	1122600	1387100	107760	110110	1358500	788450	1290700	1161900
E9PTK7;M0R9M9	E9PTK7;M0R9M9		LOC100912082	>tr|E9PTK7|E9PTK7_RAT Uncharacterized protein OS=Rattus norvegicus PE=4 SV=1;>tr|M0R9M9|M0R9M9_RAT Protein LOC100912082 OS=Rattus norvegicus GN=LOC100912082 PE=4 SV=1	140.22	1247	0	0	91884	0	0	14768	0	0	28766	209800	10836	7315.1	0	0	80440	70866	29251	324450
E9PTN4	E9PTN4		Srpk1	>tr|E9PTN4|E9PTN4_RAT Protein Srpk1 (Fragment) OS=Rattus norvegicus GN=Srpk1 PE=3 SV=2	73.332	653	0	0	0	460930	0	346940	0	0	0	369110	0	271820	0	0	0	260740	269940	233400
E9PTR4	E9PTR4		Ubap2l	>tr|E9PTR4|E9PTR4_RAT Protein Ubap2l OS=Rattus norvegicus GN=Ubap2l PE=4 SV=2	116.86	1105	41392	152220	1862000	1699000	1365400	1547300	83373	126480	389100	1720300	672540	833490	465100	247640	2652000	916320	1826800	0
E9PTR8	E9PTR8		Slc17a3	>tr|E9PTR8|E9PTR8_RAT Protein Slc17a3 OS=Rattus norvegicus GN=Slc17a3 PE=4 SV=2	54.587	498	0	0	3180900	7851300	11744000	6849400	0	0	1356100	7276900	4849400	9827800	0	0	1141600	4258600	12577000	7032300
E9PTS4	E9PTS4		Mcm5	>tr|E9PTS4|E9PTS4_RAT Minichromosome maintenance deficient 5, cell division cycle 46 (S. cerevisiae) (Predicted) OS=Rattus norvegicus GN=Mcm5 PE=3 SV=2	39.936	356	0	0	2169500	1545700	0	466810	0	0	869940	0	8039500	9719800	0	141030	2576500	1370000	2820300	353740
E9PTT0;E9PU37	E9PTT0		Zdhhc17	>tr|E9PTT0|E9PTT0_RAT Palmitoyltransferase OS=Rattus norvegicus GN=Zdhhc17 PE=3 SV=1	71.319	622	0	0	216620	494210	4092.8	451550	89277	0	154260	251480	78854	78367	0	0	505470	145590	74178	80715
E9PTT1	E9PTT1		Gpr39	>tr|E9PTT1|E9PTT1_RAT Protein Gpr39 OS=Rattus norvegicus GN=Gpr39 PE=3 SV=1	51.515	456	0	0	177480	222020	0	0	0	0	158200	445950	0	0	0	0	13909	0	0	0
E9PTT7	E9PTT7		Dhrsx	>tr|E9PTT7|E9PTT7_RAT Protein Dhrsx OS=Rattus norvegicus GN=Dhrsx PE=4 SV=2	19.273	178	97508	428080	8422700	2664900	93225	1501000	3704.4	0	1258800	3519600	1236000	1680200	51295	55725	3800500	2947600	1610600	1521400
E9PTU4;Q63862-3;Q63862-2;Q63862	E9PTU4;Q63862-3;Q63862-2;Q63862	Myosin-11	Myh11	>tr|E9PTU4|E9PTU4_RAT Myosin-11 OS=Rattus norvegicus GN=Myh11 PE=4 SV=2;>sp|Q63862-3|MYH11_RAT Isoform 3 of Myosin-11 OS=Rattus norvegicus GN=Myh11;>sp|Q63862-2|MYH11_RAT Isoform 2 of Myosin-11 OS=Rattus norvegicus GN=Myh11;>sp|Q63862|MYH11_RAT Myosin-11 (	227.29	1972	108910	102290	1402200	1294600	41250	499090	124420	169280	598350	923970	547600	832840	93321	194220	530760	451460	868100	506450
E9PTV0	E9PTV0		Guk1	>tr|E9PTV0|E9PTV0_RAT Guanylate kinase 1, isoform CRA_a OS=Rattus norvegicus GN=Guk1 PE=4 SV=2	24.052	219	1462400	1484200	4909300	4074500	4052600	8439100	436900	824110	1990600	3757500	3190200	9590400	661040	212590	2749700	3834700	8410500	97765
E9PTW1	E9PTW1		Scamp3	>tr|E9PTW1|E9PTW1_RAT Protein Scamp3 OS=Rattus norvegicus GN=Scamp3 PE=4 SV=2	38.497	350	1502600	3474600	20478000	29312000	7202600	14163000	1338600	1857700	13983000	30455000	12652000	14352000	3792300	1952000	40185000	23417000	23783000	14253000
E9PTX2	E9PTX2			>tr|E9PTX2|E9PTX2_RAT Uncharacterized protein OS=Rattus norvegicus PE=4 SV=2	30.142	259	0	0	0	0	0	326680	0	0	0	0	0	0	0	0	0	0	1255300	0
E9PU01;D3ZR50;D3ZD32;D4A5U0	E9PU01;D3ZR50;D3ZD32		Chd4;Chd5	>tr|E9PU01|E9PU01_RAT Protein Chd4 OS=Rattus norvegicus GN=Chd4 PE=4 SV=2;>tr|D3ZR50|D3ZR50_RAT Chromodomain-helicase-DNA-binding protein 5 OS=Rattus norvegicus GN=Chd5 PE=4 SV=1;>sp|D3ZD32|CHD5_RAT Chromodomain-helicase-DNA-binding protein 5 OS=Rattus nor	217.68	1915	12387	82904	418340	983600	177130	1652600	40308	47561	1342800	1490300	1050400	1063400	46611	46793	1119300	1621800	1537300	546090
E9PU11	E9PU11		Ythdf2	>tr|E9PU11|E9PU11_RAT Protein Ythdf2 (Fragment) OS=Rattus norvegicus GN=Ythdf2 PE=4 SV=2	63.996	595	0	0	0	0	0	472740	0	0	0	0	0	201950	0	0	0	0	263600	0
E9PU13	E9PU13		Snx4	>tr|E9PU13|E9PU13_RAT Protein Snx4 OS=Rattus norvegicus GN=Snx4 PE=4 SV=1	51.927	450	94129	97450	1119100	410340	469690	998010	84947	105300	419330	518680	391850	639150	55891	51749	406180	443200	954060	595060
E9PU28	E9PU28	Inosine-5-monophosphate dehydrogenase 2	Impdh2	>sp|E9PU28|IMDH2_RAT Inosine-5-monophosphate dehydrogenase 2 OS=Rattus norvegicus GN=Impdh2 PE=3 SV=1	55.814	514	3666300	4138100	20780000	13767000	10350000	16176000	4746500	3972600	21854000	9370500	7289800	10804000	5770100	7940200	35426000	24194000	24548000	38386000
E9PU32;P35525;M0R724	E9PU32;P35525;M0R724	Chloride channel protein 2	Clcn2	>tr|E9PU32|E9PU32_RAT Protein LOC100912455 OS=Rattus norvegicus GN=Clcn2 PE=4 SV=2;>sp|P35525|CLCN2_RAT Chloride channel protein 2 OS=Rattus norvegicus GN=Clcn2 PE=2 SV=1;>tr|M0R724|M0R724_RAT Chloride channel protein 2 OS=Rattus norvegicus GN=Clcn2 PE=4 S	96.985	887	614020	0	91099	79545	0	0	0	0	0	117890	77932	0	0	0	43641	0	0	0
E9PU34	E9PU34		Rmnd1	>tr|E9PU34|E9PU34_RAT Protein Rmnd1 OS=Rattus norvegicus GN=Rmnd1 PE=4 SV=2	51.698	450	3782700	3907500	17213000	11596000	1847900	17441000	4518900	4630200	15768000	36208000	18275000	17074000	2481800	1375700	17505000	10014000	25169000	24328000
E9PU42	E9PU42		Dscr3	>tr|E9PU42|E9PU42_RAT Down syndrome critical region gene 3 (Predicted), isoform CRA_c OS=Rattus norvegicus GN=Dscr3 PE=4 SV=2	32.936	297	498630	928440	4675600	4190400	265380	3334200	519510	465130	3996600	6129000	2304300	3844500	624620	72729	2235400	3595300	2853000	2959500
F1LLV5	F1LLV5			>tr|F1LLV5|F1LLV5_RAT Uncharacterized protein OS=Rattus norvegicus PE=3 SV=2	48.729	426	801320	1644000	7366000	7141700	2009100	1716600	199380	275660	1180100	1049500	769690	6605000	433850	0	2677900	0	774400	2092000
F1LM03	F1LM03		Cyp2c24	>tr|F1LM03|F1LM03_RAT Cytochrome P450 2C55 OS=Rattus norvegicus GN=Cyp2c24 PE=3 SV=2	55.952	488	1032000	1550000	0	275820	2089600	1385400	1235200	950950	4719500	3906000	6022400	16797000	557610	1505100	3580000	5280900	7474500	6160500
F1LM22	F1LM22		Ugt2b15	>tr|F1LM22|F1LM22_RAT UDP-glucuronosyltransferase 2B2 OS=Rattus norvegicus GN=Ugt2b PE=3 SV=2	60.995	530	1156000	2877800	13304000	7410700	4563500	3228900	274160	474060	3504200	564120	823300	276040	163950	150190	6322400	0	0	1082400
F1LM28;P97526	F1LM28;P97526	Neurofibromin	Nf1	>tr|F1LM28|F1LM28_RAT Neurofibromin (Fragment) OS=Rattus norvegicus GN=Nf1 PE=4 SV=2;>sp|P97526|NF1_RAT Neurofibromin OS=Rattus norvegicus GN=Nf1 PE=1 SV=1	315.69	2808	0	0	0	0	0	0	0	0	0	0	0	0	0	0	0	0	0	2505400
F1LM30;F1LPW0	F1LM30;F1LPW0			>tr|F1LM30|F1LM30_RAT Uncharacterized protein (Fragment) OS=Rattus norvegicus PE=4 SV=2;>tr|F1LPW0|F1LPW0_RAT Uncharacterized protein (Fragment) OS=Rattus norvegicus PE=4 SV=1	51.745	470	879100	975300	6939500	12069000	16614000	23841000	1913600	3652800	25043000	13167000	11356000	6925900	2197200	1612400	29492000	15747000	6330200	13474000
F1LM33;Q5SGE0	F1LM33;Q5SGE0	Leucine-rich PPR motif-containing protein, mitochondrial	Lrpprc	>tr|F1LM33|F1LM33_RAT Leucine-rich PPR motif-containing protein, mitochondrial OS=Rattus norvegicus GN=Lrpprc PE=4 SV=2;>sp|Q5SGE0|LPPRC_RAT Leucine-rich PPR motif-containing protein, mitochondrial OS=Rattus norvegicus GN=Lrpprc PE=1 SV=1	156.68	1392	5841700	9063500	62074000	74557000	45643000	61540000	8954000	10672000	58557000	94306000	38306000	78411000	8321600	8069500	64204000	96949000	97179000	51781000
F1LM37;F1LSC3	F1LM37;F1LSC3		Sf1	>tr|F1LM37|F1LM37_RAT Protein Sf1 OS=Rattus norvegicus GN=Sf1 PE=4 SV=2;>tr|F1LSC3|F1LSC3_RAT Protein Sf1 OS=Rattus norvegicus GN=Sf1 PE=4 SV=2	59.698	548	602530	47874	5432200	4704300	6448900	9760300	299640	0	7907500	16072000	5589800	7859700	662830	643100	8891200	5520600	5726100	8122300
F1LM47	F1LM47		Sucla2	>tr|F1LM47|F1LM47_RAT Protein Sucla2 OS=Rattus norvegicus GN=Sucla2 PE=3 SV=1	50.306	465	37602000	45218000	235590000	298770000	188750000	278640000	43729000	52177000	223440000	283670000	237260000	186780000	29866000	35517000	211240000	242360000	245120000	183810000
F1LM55	F1LM55		RGD1309922	>tr|F1LM55|F1LM55_RAT Protein RGD1309922 OS=Rattus norvegicus GN=Ccar2 PE=4 SV=1	102.79	922	355770	1249300	5755200	7164100	7049100	6509300	419550	841200	6015900	9369300	5510700	7540800	624030	651220	5730600	4544700	6959400	5240700
F1LM60;D4ABQ7	F1LM60;D4ABQ7		Arap1	>tr|F1LM60|F1LM60_RAT Protein Arap1 OS=Rattus norvegicus GN=Arap1 PE=4 SV=1;>tr|D4ABQ7|D4ABQ7_RAT Protein Arap1 OS=Rattus norvegicus GN=Arap1 PE=4 SV=1	161.1	1443	28462	49571	1360400	1579600	1548500	330510	5430.9	27282	856590	784990	655010	632190	22587	21389	1403100	650930	941710	827760
F1LM66	F1LM66		Eftud2	>tr|F1LM66|F1LM66_RAT Protein Eftud2 OS=Rattus norvegicus GN=Eftud2 PE=4 SV=1	109.48	972	947230	1878700	10234000	18759000	6029400	8437700	1401100	1547200	8027800	17679000	5701900	10543000	1459100	688590	12590000	11025000	13238000	5133000
F1LMA4;P26817;P26819	F1LMA4;P26817;P26819	Beta-adrenergic receptor kinase 1;Beta-adrenergic receptor kinase 2	Adrbk1;Adrbk2	>tr|F1LMA4|F1LMA4_RAT Beta-adrenergic receptor kinase 1 (Fragment) OS=Rattus norvegicus GN=Adrbk1 PE=3 SV=2;>sp|P26817|ARBK1_RAT Beta-adrenergic receptor kinase 1 OS=Rattus norvegicus GN=Adrbk1 PE=2 SV=1;>sp|P26819|ARBK2_RAT Beta-adrenergic receptor kinase	75.708	652	0	0	224300	259390	201130	224630	0	0	201600	294140	185160	173610	0	0	288770	268110	387460	277830
F1LMA9	F1LMA9		Znfx1	>tr|F1LMA9|F1LMA9_RAT Protein Znfx1 (Fragment) OS=Rattus norvegicus GN=Znfx1 PE=4 SV=1	230.6	2017	0	0	197190	160390	5710.1	57684	5878.2	0	134760	276910	31021	110150	0	0	233670	18064	184870	29434
F1LMI7;D3ZXK7	F1LMI7;D3ZXK7	E3 ubiquitin-protein ligase RNF123	Rnf123	>tr|F1LMI7|F1LMI7_RAT E3 ubiquitin-protein ligase RNF123 OS=Rattus norvegicus GN=Rnf123 PE=4 SV=1;>sp|D3ZXK7|RN123_RAT E3 ubiquitin-protein ligase RNF123 OS=Rattus norvegicus GN=Rnf123 PE=1 SV=1	148.29	1312	63951	118620	515230	247510	372290	346100	105460	101990	180310	224570	266160	398770	71749	34219	866710	402290	426270	237470
F1LMJ8;Q99P63	F1LMJ8;Q99P63	Calcium uptake protein 2, mitochondrial	Micu2	>tr|F1LMJ8|F1LMJ8_RAT Calcium uptake protein 2, mitochondrial OS=Rattus norvegicus GN=Micu2 PE=4 SV=1;>sp|Q99P63|MICU2_RAT Calcium uptake protein 2, mitochondrial OS=Rattus norvegicus GN=Micu2 PE=2 SV=1	49.214	431	584470	221760	1417300	2982600	121730	2630100	200880	0	1857600	2630700	432300	1099400	0	0	1454500	1428500	107710	0
F1LMK0;D4A9M6;O88884-2;O88884	F1LMK0;D4A9M6;O88884-2;O88884	A-kinase anchor protein 1, mitochondrial	Akap1	>tr|F1LMK0|F1LMK0_RAT A kinase (PRKA) anchor protein 1, isoform CRA_a OS=Rattus norvegicus GN=Akap1 PE=4 SV=2;>tr|D4A9M6|D4A9M6_RAT A kinase (PRKA) anchor protein 1, isoform CRA_b OS=Rattus norvegicus GN=Akap1 PE=4 SV=2;>sp|O88884-2|AKAP1_RAT Isoform 2 of	57.651	544	136080	354910	1953100	1352800	1681400	1655300	156840	264290	1661200	1910300	255540	1454600	264670	126570	1755600	2059300	2051400	1513200
F1LML0	F1LML0		Nars	>tr|F1LML0|F1LML0_RAT Protein Nars OS=Rattus norvegicus GN=Nars PE=3 SV=1	58.303	507	0	0	225210	269760	0	607980	0	0	0	410340	0	0	0	0	277130	327820	0	0
F1LML3;P31210	F1LML3;P31210	3-oxo-5-beta-steroid 4-dehydrogenase	Akr1d1	>tr|F1LML3|F1LML3_RAT 3-oxo-5-beta-steroid 4-dehydrogenase OS=Rattus norvegicus GN=Akr1d1 PE=4 SV=1;>sp|P31210|AK1D1_RAT 3-oxo-5-beta-steroid 4-dehydrogenase OS=Rattus norvegicus GN=Akr1d1 PE=1 SV=1	37.13	324	786130000	1263600000	5107800000	6682200000	3452400000	6148100000	982560000	1279000000	5663800000	7101100000	5624200000	4860500000	711840000	925760000	7719400000	4634200000	7055700000	5695700000
F1LML7	F1LML7		Hip1r	>tr|F1LML7|F1LML7_RAT Protein Hip1r OS=Rattus norvegicus GN=Hip1r PE=4 SV=1	119.55	1069	67019	81468	1520600	1438700	2284000	1211400	67656	197550	625020	1218300	736590	1573500	89441	102250	1729500	956230	2093300	1080200
F1LMQ3;D3ZDK8	F1LMQ3		Psmd8	>tr|F1LMQ3|F1LMQ3_RAT Protein Psmd8 OS=Rattus norvegicus GN=Psmd8 PE=4 SV=1	39.877	353	6183200	11070000	38568000	41089000	10546000	38951000	8447600	7419800	29770000	42222000	26672000	36159000	7338600	5534500	38172000	72891000	49407000	41350000
F1LMV6	F1LMV6		Dsp	>tr|F1LMV6|F1LMV6_RAT Protein Dsp OS=Rattus norvegicus GN=Dsp PE=1 SV=1	332.39	2877	172810	779790	26539000	10454000	5316900	26535000	20125000	714800	22378000	14781000	6544800	8433800	863780	433800	14522000	16640000	17094000	9402100
F1LMW7;P30009	F1LMW7;P30009	Myristoylated alanine-rich C-kinase substrate	Marcks	>tr|F1LMW7|F1LMW7_RAT Myristoylated alanine-rich C-kinase substrate OS=Rattus norvegicus GN=Marcks PE=4 SV=2;>sp|P30009|MARCS_RAT Myristoylated alanine-rich C-kinase substrate OS=Rattus norvegicus GN=Marcks PE=1 SV=2	29.888	308	785720	1675300	20337000	387170	6164600	16599000	1533800	1030900	8887300	7475100	10084000	10218000	1258600	975430	19770000	11080000	12987000	5571400
F1LMZ2;B2RZC9	F1LMZ2;B2RZC9	Keratinocyte-associated protein 2	Krtcap2	>tr|F1LMZ2|F1LMZ2_RAT Keratinocyte-associated protein 2 (Fragment) OS=Rattus norvegicus GN=Krtcap2 PE=4 SV=2;>sp|B2RZC9|KTAP2_RAT Keratinocyte-associated protein 2 OS=Rattus norvegicus GN=Krtcap2 PE=2 SV=2	14.432	134	14091000	28481000	117520000	189510000	31855000	192940000	16618000	21436000	65980000	188180000	78690000	98606000	18180000	5051800	131600000	96878000	107920000	4202500
F1LMZ8;D3Z950	F1LMZ8;D3Z950	26S proteasome non-ATPase regulatory subunit 11	Psmd11	>sp|F1LMZ8|PSD11_RAT 26S proteasome non-ATPase regulatory subunit 11 OS=Rattus norvegicus GN=Psmd11 PE=3 SV=2;>tr|D3Z950|D3Z950_RAT 26S proteasome non-ATPase regulatory subunit 11 OS=Rattus norvegicus GN=Psmd11 PE=4 SV=1	47.463	422	13839000	27113000	129220000	147130000	81625000	85486000	15054000	18378000	49179000	130830000	102880000	87555000	12829000	20510000	112420000	103410000	169140000	134380000
F1LN18;Q63617	F1LN18;Q63617	Hypoxia up-regulated protein 1	Hyou1	>tr|F1LN18|F1LN18_RAT Hypoxia up-regulated protein 1 OS=Rattus norvegicus GN=Hyou1 PE=3 SV=1;>sp|Q63617|HYOU1_RAT Hypoxia up-regulated protein 1 OS=Rattus norvegicus GN=Hyou1 PE=1 SV=1	111.29	999	15493000	27170000	139020000	204320000	104040000	156230000	14642000	16182000	75529000	172170000	66363000	102750000	16905000	10639000	133080000	171630000	212670000	82526000
F1LN30	F1LN30		Sumo2l	>tr|F1LN30|F1LN30_RAT Protein Sumo2l OS=Rattus norvegicus GN=Sumo2l PE=4 SV=1	10.872	95	0	0	0	11673000	0	0	0	0	0	0	0	0	0	0	9223700	10095000	0	0
F1LN35	F1LN35		Dmd	>tr|F1LN35|F1LN35_RAT Dystrophin OS=Rattus norvegicus GN=Dmd PE=4 SV=1	70.784	622	0	0	654090	853640	257380	0	0	0	348310	539760	230600	109530	0	0	1222400	1025000	1387100	713560
F1LN42;M0R671;D4ADU3;F1LN91	F1LN42		Tns1	>tr|F1LN42|F1LN42_RAT Protein Tns1 OS=Rattus norvegicus GN=Tns1 PE=4 SV=2	203.91	1909	70205	52809	948380	1513900	682340	627580	59464	171460	992230	1593400	603540	946180	39969	51189	887530	1277500	943210	395900
F1LN53;F1LPL6	F1LN53;F1LPL6	Tyrosine-protein kinase receptor	Insr	>tr|F1LN53|F1LN53_RAT Tyrosine-protein kinase receptor OS=Rattus norvegicus GN=Insr PE=3 SV=2;>tr|F1LPL6|F1LPL6_RAT Tyrosine-protein kinase receptor OS=Rattus norvegicus GN=Insr PE=3 SV=2	140.33	1236	0	0	0	81348	162910	0	0	0	0	179640	154160	242110	0	0	0	0	0	0
F1LN59;M0RAS7	F1LN59;M0RAS7		Eif4g2	>tr|F1LN59|F1LN59_RAT Protein Eif4g2 (Fragment) OS=Rattus norvegicus GN=Eif4g2 PE=4 SV=2;>tr|M0RAS7|M0RAS7_RAT Uncharacterized protein (Fragment) OS=Rattus norvegicus PE=4 SV=1	102.11	906	310280	677160	4467100	3910800	1079000	6171000	423310	386410	1165800	7104200	3443700	4301400	415410	391740	3298500	4985700	8064800	7141900
[truncated: 3,682 more rows]

## Sheet: MASS FRACTIONS
Mass fractions of the 5138 proteins that were identified at least once in the 18 samples sorted in alphabetical order
							AL								RES								CU
[truncated: 5,139 more rows]

## Sheet: COPY  NUMBERS
Copy numbers of the 5138 proteins that were identified at least once in the 18 samples sorted in alphabetical order
									AL								RES								CU
[truncated: 5,134 more rows]

## Sheet: MEAN MASS FRACTIONS
Mean mass fractions and p-values sorted by decreasing abundance in RES
[truncated: 5,134 more rows]

## Sheet: MEAN COPY NUMBERS
Mean copy numbers per cubic micrometer of a cell and SDs sorted by decreasing numbers in RES
[truncated: 5,134 more rows]
