# Supplementary material for: Quantitative proteomics of rat livers shows that unrestricted feeding is stressful for proteostasis with implications on life span
Source: publisher site journal article supplement (doi:10.18632/aging.101009), 2016-08-09
Supplement: Supplementary file 4 [file aging-v8i8-101009-supplementary-material-SD3.xlsx]

## Sheet: Sheet1
Protein IDs	Protein names	Gene names	Mean mass fraction (RES-AL)	t-test (RES-AL)
P07756	Carbamoyl-phosphate synthase [ammonia], mitochondrial	Cps1	0.044943	0.000838438
B0BMW2;O70351	3-hydroxyacyl-CoA dehydrogenase type-2	Hsd17b10	0.00104384	0.00109627
P22789	Alcohol sulfotransferase A	St2a2	0.000822903	0.00624475
Q68FU3	Electron transfer flavoprotein subunit beta	Etfb	0.000771199	0.0147988
P51647	Retinal dehydrogenase 1	Aldh1a1	0.000766348	0.0276609
P14604	Enoyl-CoA hydratase, mitochondrial	Echs1	0.0007643	0.00558091
Q63342	Dimethylglycine dehydrogenase, mitochondrial	Dmgdh	0.000712481	0.0283687
P04636	Malate dehydrogenase, mitochondrial	Mdh2	0.000663822	0.0483028
Q9ES38	Bile acyl-CoA synthetase	Slc27a5	0.000649374	0.00801397
G3V734;Q64591	2,4-dienoyl-CoA reductase, mitochondrial	Decr1	0.000645345	0.0139256
O88618	Formimidoyltransferase-cyclodeaminase;Glutamate formimidoyltransferase;Formimidoyltetrahydrofolate cyclodeaminase	Ftcd	0.000637885	0.0450243
Q68G41;P23965	Enoyl-CoA delta isomerase 1, mitochondrial	Eci1	0.000607302	0.000405934
Q64550	UDP-glucuronosyltransferase 1-1	Ugt1a1	0.000553907	0.0562129
Q64428	Trifunctional enzyme subunit alpha, mitochondrial;Long-chain enoyl-CoA hydratase;Long chain 3-hydroxyacyl-CoA dehydrogenase	Hadha	0.0005365	0.0333101
P13221	Aspartate aminotransferase, cytoplasmic	Got1	0.000533712	0.0358572
F1M1W1	Acyl-coenzyme A synthetase ACSM1	Bucs1	0.000532055	0.0169403
P56574	Isocitrate dehydrogenase [NADP], mitochondrial	Idh2	0.000512336	0.00550903
D3ZT90	Glutaryl-Coenzyme A dehydrogenase	Gcdh	0.000480657	0.001868
F1LRY5;Q64380	Sarcosine dehydrogenase, mitochondrial	Sardh	0.000447824	0.039627
P11711	Cytochrome P450 2A1	Cyp2a1	0.000444936	0.0135359
P29266	3-hydroxyisobutyrate dehydrogenase, mitochondrial	Hibadh	0.000410673	0.00323744
D4A2K1	4-hydroxy-2-oxoglutarate aldolase	Hoga1	0.000406306	0.0282405
A2VCW9;D4ACE9	Alpha-aminoadipic semialdehyde synthase, mitochondrial;Lysine ketoglutarate reductase;Saccharopine dehydrogenase	Aass	0.000397767	9.24576e-05
P13255;M0RDH0	Glycine N-methyltransferase	Gnmt;LOC100911564	0.000397661	0.0127488
Q64648;P11510	Cytochrome P450 2C12, female-specific	LOC100361492;Cyp2c12	0.000376924	0.0535536
D3Z8I7	Glutathione S-transferase theta 3	Gstt3	0.000373148	0.00193852
Q64581;G3V635	Cytochrome P450 3A18	Cyp3a18	0.000341988	0.00301133
Q9ER34	Aconitate hydratase, mitochondrial	Aco2	0.000337191	0.00894243
Q4KLP0;F1LQZ8	Probable 2-oxoglutarate dehydrogenase E1 component DHKTD1, mitochondrial	Dhtkd1	0.000335297	0.0201917
G3V7N5;P18886	Carnitine O-palmitoyltransferase 2, mitochondrial	Cpt2	0.000334888	0.00581659
P70473	Alpha-methylacyl-CoA racemase	Amacr	0.000327172	0.0104517
P05183;F1LQK1;M0R5E9;M0RDI0	Cytochrome P450 3A2	Cyp3a2	0.000304178	0.015416
F1LPV8	Succinyl-CoA ligase [GDP-forming] subunit beta	Suclg2	0.000274589	0.00317593
Q68G31	Phenazine biosynthesis-like domain-containing protein	Pbld	0.000268446	0.0035925
P97519;D4A5C3	Hydroxymethylglutaryl-CoA lyase, mitochondrial	Hmgcl	0.000247225	0.014652
F1LNF1;M0R6J9;F1LM82;A7VJC2-2;A7VJC2-3	Heterogeneous nuclear ribonucleoproteins A2/B1	Hnrnpa2b1	0.000246443	0.00297992
P25409	Alanine aminotransferase 1	Gpt	0.000235389	0.00467751
P05178;M0RB90;D4A820	Cytochrome P450 2C6	Cyp2c6;Cyp2c6v2	0.000230032	0.0563978
P17178	Sterol 26-hydroxylase, mitochondrial	Cyp27a1	0.000216453	0.0140813
P06685;P06687;Q64541;P54708-2;P09626;F1LRK1	Sodium/potassium-transporting ATPase subunit alpha-1	Atp1a1	0.000211106	0.00420789
Q6AYS8	Estradiol 17-beta-dehydrogenase 11	Hsd17b11	0.000200763	0.0513869
Q8K4C0	Dimethylaniline monooxygenase [N-oxide-forming] 5	Fmo5	0.000197232	0.00367924
Q6IMX8;O55171;G3V7C4;O88267	Acyl-coenzyme A thioesterase 2, mitochondrial;Acyl-coenzyme A thioesterase 1	Acot2;Acot1	0.000177369	0.0144524
Q6AYT9;Q7TMB6	Acyl-coenzyme A synthetase ACSM5, mitochondrial	Acsm5	0.000173849	8.61253e-05
Q68FZ8		Pccb	0.00017217	0.000268197
O70127;M0R4J2	Bile salt export pump	Abcb11	0.00016692	0.00393336
B1H250		RGD1564894	0.000165649	0.0106927
P70584	Short/branched chain specific acyl-CoA dehydrogenase, mitochondrial	Acadsb	0.000160247	0.000579123
F1LP30;Q5I0C3	Methylcrotonoyl-CoA carboxylase subunit alpha, mitochondrial	Mccc1	0.000156549	0.00650811
P55051	Fatty acid-binding protein, brain	Fabp7	0.000146499	0.0415878
Q9Z2Y0	Glycine N-acyltransferase-like protein Keg1	Keg1	0.000146416	0.000180641
O35913;P70502-10;P70502-11;P70502-13;P70502-12;P70502-14;P70502-8;P70502-15;P70502-7;D3ZXC2;P70502-6;P70502-5;P70502-4;F1LRQ7;P70502-3;P70502-2;P70502;P70502-9;O88397	Solute carrier organic anion transporter family member 1A4	Slco1a4	0.000145488	0.0205741
Q5PQT3	Glycine N-acyltransferase	Glyat	0.000135821	0.000845452
Q6URK4-2;D4A6A2;E9PSU5;F1LZZ2	Heterogeneous nuclear ribonucleoprotein A3	Hnrnpa3	0.000130923	0.00370992
P28492-2;P28492	Glutaminase liver isoform, mitochondrial	Gls2	0.0001278	0.00467742
P32198;Q63704	Carnitine O-palmitoyltransferase 1, liver isoform	Cpt1a	0.000126908	0.0171505
M0RCU5		LOC684055	0.000126444	0.000938242
P14882	Propionyl-CoA carboxylase alpha chain, mitochondrial	Pcca	0.000126098	9.24032e-05
P20760;F1LN61	Ig gamma-2A chain C region	Igg-2a	0.000124372	0.0305355
B0BNJ4		Ethe1	0.000118064	0.0136627
P04799;D3ZF33	Cytochrome P450 1A2	Cyp1a2	0.000115971	0.0371057
Q4QQW3	Hydroxyacid-oxoacid transhydrogenase, mitochondrial	Adhfe1	0.000110329	0.000601791
Q5XIT9	Methylcrotonoyl-CoA carboxylase beta chain, mitochondrial	Mccc2	0.00010802	0.0212127
Q7TPA1		Slc25a15	0.000107851	0.0523566
F1MAR6		Prodh	9.92259e-05	0.00143348
Q641Y2	NADH dehydrogenase [ubiquinone] iron-sulfur protein 2, mitochondrial	Ndufs2	9.81061e-05	0.0586725
D3ZKG1		Mut	9.7278e-05	0.00156967
P01836;P01835	Ig kappa chain C region, A allele		8.01143e-05	0.0381006
Q6SKG1	Acyl-coenzyme A synthetase ACSM3, mitochondrial	Acsm3	6.82776e-05	5.17568e-05
P08932;F7EUK4	T-kininogen 2;T-kininogen 2 heavy chain;T-kinin;T-kininogen 2 light chain	Kng1l1	6.78798e-05	0.0394565
G3V9D8		Ces2c	6.73642e-05	0.0541586
P07340	Sodium/potassium-transporting ATPase subunit beta-1	Atp1b1	6.67572e-05	0.0120977
F2Z3R2;F1LQ48;Q5U1Y5;F1M040		Hnrnpl	6.66193e-05	0.00029881
F7F0U1		Cyp3a9	6.64269e-05	0.00289319
P17625;D4A5K9	Glycogen [starch] synthase, liver	Gys2	6.56497e-05	0.0434313
Q6IMY8		Hnrnpu	6.46791e-05	0.0253419
O88867	Kynurenine 3-monooxygenase	Kmo	6.4641e-05	0.0532088
D4A264		Zadh2	6.40038e-05	0.0141387
O35796	Complement component 1 Q subcomponent-binding protein, mitochondrial	C1qbp	6.17568e-05	0.0436829
Q9EQV6;Q642E6	Tripeptidyl-peptidase 1	Tpp1	6.03889e-05	0.0370508
Q6AYS3		Ctsa	5.65738e-05	0.0437783
P09367-2;F1LMK6;P09367	L-serine dehydratase/L-threonine deaminase	Sds	5.50227e-05	0.0171231
D3ZNJ5		Inmt	5.38107e-05	0.0192744
M0RBL9;M0RB18		Vwa8	5.26715e-05	0.0183906
Q9JJ54-4;Q9JJ54-3;G3V6A4;Q9JJ54-2;G3V6A5;Q9JJ54;G3V9G2;P17132;M0RAX7;M0R9X3	Heterogeneous nuclear ribonucleoprotein D0;Heterogeneous nuclear ribonucleoprotein C	Hnrnpd;Hnrpd;Hnrnpc	4.57273e-05	0.0313783
F1LU71		Auh	4.46867e-05	0.0058771
Q99NA5;F1LNF7	Isocitrate dehydrogenase [NAD] subunit alpha, mitochondrial	Idh3a	4.42604e-05	0.0236794
Q99NB7;G3V820	Acyl-coenzyme A thioesterase 12	Acot12	4.25071e-05	0.0240034
Q4V8F9	Hydroxysteroid dehydrogenase-like protein 2	Hsdl2	4.04921e-05	0.00839003
I6L9G6		Tardbp	3.82568e-05	0.0592325
P09006	Serine protease inhibitor A3N	Serpina3n	3.81141e-05	0.0244941
Q5M876	Aspartoacylase-2	Acy3	3.68066e-05	0.00436346
Q6P2A5;P29411	GTP:AMP phosphotransferase AK3, mitochondrial	Ak3	3.63999e-05	0.0219161
Q05096;Q05096-3;Q05096-2;D3ZC71;F1LSW1;D3ZNP7;D4A2X2	Unconventional myosin-Ib	Myo1b	3.4676e-05	0.00266927
O70490	Acyl-coenzyme A synthetase ACSM2, mitochondrial	Acsm2	3.33424e-05	0.0129689
Q3KRE2		Mettl7a	3.0443e-05	0.0287934
P01048	T-kininogen 1;T-kininogen 1 heavy chain;T-kinin;T-kininogen 1 light chain	Map1	2.75354e-05	0.0568839
Q923M1;Q923M1-3;Q923M1-2;F1LSJ6;M0RCC8;M0RCJ2;Q923M1-4	Mitochondrial peptide methionine sulfoxide reductase	Msra	2.70984e-05	0.0482191
Q6AXR4;F1LR87	Beta-hexosaminidase subunit beta;Beta-hexosaminidase	Hexb	2.6945e-05	0.00947069
D4A9D6		Dhx9	2.55691e-05	0.0113873
G3V9R8;D3ZXZ0		Hnrnpc	2.53077e-05	0.0227998
Q4G069	Regulator of microtubule dynamics protein 1	Rmdn1	2.52859e-05	0.0478243
Q64536;F1LMM8	[Pyruvate dehydrogenase [lipoamide]] kinase isozyme 2, mitochondrial	Pdk2	2.4131e-05	0.0342353
Q505J6	Mitochondrial glutamate carrier 2	Slc25a18	2.38446e-05	0.0254034
P07154	Cathepsin L1;Procathepsin L;Cathepsin L1 heavy chain;Cathepsin L1 light chain	Ctsl1	2.38193e-05	0.0174378
P00185	Cytochrome P450 1A1;Cytochrome P450MT2A;Cytochrome P450MT2B	Cyp1a1	2.36029e-05	0.022623
P21643	Tryptophan 2,3-dioxygenase	Tdo2	2.21103e-05	0.0506071
Q704S8;D3ZXM8	Carnitine O-acetyltransferase	Crat	2.18363e-05	0.00997953
P04256;F7FEZ6;M0R584;D4A2D2;D4ACJ7;F1M6M1;F1M6C7;F1LUF2	Heterogeneous nuclear ribonucleoprotein A1	Hnrnpa1	2.16737e-05	0.0589875
D3ZDE4		Dguok	2.11244e-05	0.0125397
A3KN98		Bco2	2.10555e-05	0.0190423
P43244	Matrin-3	Matr3	2.08986e-05	0.00982834
Q68FU7	Ubiquinone biosynthesis monooxygenase COQ6	Coq6	2.02758e-05	0.0193801
Q6P7Q6;P97840-2;P97840;G3V7N8	Galectin-9	Lgals9	2.01376e-05	0.00813443
M0R629;M0R9J5	Adenylosuccinate synthetase isozyme 1	Adssl1	1.91352e-05	0.0136372
P07943;M0RC16;F8WG68	Aldose reductase	Akr1b1	1.8889e-05	0.0245598
D3ZLK9;D4AAT7	ATP-dependent (S)-NAD(P)H-hydrate dehydratase	Carkd	1.73704e-05	0.0507513
Q66H12	Alpha-N-acetylgalactosaminidase	Naga	1.63897e-05	0.0275325
P36970-2;P36970;F8WFK6;Q91XR8	Phospholipid hydroperoxide glutathione peroxidase, mitochondrial;Glutathione peroxidase;Phospholipid hydroperoxide glutathione peroxidase, nuclear	Gpx4	1.60579e-05	0.0432929
G3V9N7		Pacsin3	1.60573e-05	0.0577669
B2GUX7		Creg1	1.55434e-05	0.020666
O88563;F1LMJ7;D3ZF64	Canalicular multispecific organic anion transporter 2	Abcc3	1.53646e-05	0.0500673
Q3V5X8		Endog	1.36882e-05	0.00271717
F1M8L5;D4A882		Pcca	1.30488e-05	0.0249834
Q08201;G3V9C8	Multidrug resistance protein 3	Abcb4	1.26333e-05	0.0587579
Q9EPB1	Dipeptidyl peptidase 2	Dpp7	1.25669e-05	0.0250761
G3V8N0		Sfxn2	1.24794e-05	0.0433257
Q9JK64;G3V9J6;P43245;D4A0Y9	Multidrug resistance protein 1	Abcb1a;Abcb1b;Abcb1	1.21929e-05	0.0136288
P00176;B2GV28;Q64583	Cytochrome P450 2B1	Cyp2b1	1.10178e-05	0.0543142
F1LN92		Afg3l2	1.03319e-05	0.0189154
B2RYT9;D4A601	Translational activator of cytochrome c oxidase 1	Taco1	1.01905e-05	0.00828869
P43165	Carbonic anhydrase 5A, mitochondrial	Ca5a	1.00694e-05	0.0313965
Q8K3R4		Adipoq	9.6323e-06	0.0180601
P05982	NAD(P)H dehydrogenase [quinone] 1	Nqo1	9.25809e-06	0.0352832
B5DFE0		Mpp6	9.15943e-06	0.0380148
D3ZTW7		Atpaf2	8.99896e-06	0.0475433
D3ZA85		Nfu1	8.42124e-06	0.00950831
Q9JK11-2;Q9JK11-4;Q9JK11;F1LQN3	Reticulon-4	Rtn4	8.16778e-06	0.0516335
D3ZWC6		Sntb1	8.06512e-06	0.0309236
Q6AYF4	Integrin beta-6	Itgb6	7.97531e-06	0.0221659
Q6URK4;D3ZJF4;D3ZTB7;F1LW17	Heterogeneous nuclear ribonucleoprotein A3	Hnrnpa3;LOC100360986	7.94387e-06	0.00435204
Q63355	Unconventional myosin-Ic	Myo1c	7.43267e-06	0.0526555
Q6AXY0	Glutathione S-transferase A6	Gsta6	6.74452e-06	0.0447635
D3ZEG8		RGD1309188	6.70604e-06	0.0501832
M0RAV0;M0RDZ5;M0RC23;F1M7B3;M0R7M5;D3ZIL8;M0RD98;F1LU24		LOC100911032	6.6946e-06	0.00166381
D3ZJF9		Gla	6.37673e-06	0.0435552
Q9QX71		Napsa	6.20195e-06	0.0585293
Q4KLZ0		Vnn1	6.13853e-06	0.0176526
Q9Z1E1;Q9Z1E1-2	Flotillin-1	Flot1	5.95595e-06	0.00697165
E9PTI6		Raly	5.92115e-06	0.0187232
Q5BJP6;F1LMZ4	Ribosome-releasing factor 2, mitochondrial	Gfm2	5.71915e-06	0.0550581
D3ZBH7;D3ZAE9		Abca8	5.62518e-06	0.0583601
D3ZRC4		Pnpla8	5.35379e-06	0.0415943
C0KUC5		Lims1	5.19208e-06	0.0332737
Q01992;F1LPX0	Mitochondrial intermediate peptidase	Mipep	5.04576e-06	0.0573219
D4A1J4	3-hydroxybutyrate dehydrogenase type 2	Bdh2	4.89079e-06	0.00325705
D4A7X5		Ppm1k	4.8541e-06	0.00753033
D4A500		Hddc3	4.83042e-06	0.0421065
Q6XFR6	Glycophorin-C	Gypc	4.71259e-06	0.0471156
F1LWG4		Ndufaf1	4.62942e-06	0.0234745
O35048;D3ZPY2	3 beta-hydroxysteroid dehydrogenase type 7	Hsd3b7	4.51048e-06	0.00955597
P27926	Hexokinase-3	Hk3	3.87335e-06	0.0456848
Q9Z2S9-3;Q9Z2S9-2;Q9Z2S9	Flotillin-2	Flot2	3.74844e-06	0.0347918
M0R7F6		LOC687071	3.37862e-06	0.0063614
G3V904		Pld4	3.23676e-06	0.00012974
Q6MG90;CON__P01030;CON__ENSEMBL:ENSBTAP00000007350		C4b	3.01292e-06	0.0121246
Q499V1		Upp1	2.77405e-06	0.044761
Q5BK72		Rab30	2.58549e-06	0.0214456
F1M471		Epm2aip1	2.58425e-06	0.0230064
Q5BJU0		Rras2	2.5032e-06	0.00260839
Q8R5M5;F8WFI2	2-amino-3-carboxymuconate-6-semialdehyde decarboxylase	Acmsd	2.29751e-06	0.00157719
D3Z9B0		Glod5	2.18256e-06	0.000481118
Q6IMX4;P97544	Lipid phosphate phosphohydrolase 3	Ppap2b	2.01986e-06	0.0523804
P51639	3-hydroxy-3-methylglutaryl-coenzyme A reductase	Hmgcr	1.69296e-06	0.0499323
Q4V8J4	Glycerol-3-phosphate acyltransferase 3	Agpat9	1.53517e-06	0.0525209
Q9ET45		Bnip3	1.52545e-06	0.00202373
Q9EPH2	MARCKS-related protein	Marcksl1	1.48334e-06	0.0432453
P21743	Insulin-like growth factor-binding protein 1	Igfbp1	1.44176e-06	0.00473073
F1LVL4		LOC100363935	9.75785e-07	0.027229
Q5I0I9	Coenzyme Q-binding protein COQ10 homolog B, mitochondrial	Coq10b	8.92745e-07	0.0225819
Q6TXF3		Dbi	8.85637e-07	0.0546349
Q6IFV4	Keratin, type I cytoskeletal 13	Krt13	6.46662e-07	0.0577128
F1MAJ8		Zfp91	5.08576e-07	0.0445558
P25086	Interleukin-1 receptor antagonist protein	Il1rn	3.02091e-07	0.038839
D4AC93;M0RAC5;M0RCL0		Tmem223;LOC100910452	2.85821e-07	0.0271
Q920L6	Elongation of very long chain fatty acids protein 6	Elovl6	1.52193e-07	0.0340631
D3ZG00		Med30	-2.54377e-07	0.011605
O35986	Zinc finger Ran-binding domain-containing protein 2	Zranb2	-2.82888e-07	0.00646481
Q811A3;G3V9I0;Q811A3-2;D3ZQR7	Procollagen-lysine,2-oxoglutarate 5-dioxygenase 2	Plod2	-3.69083e-07	0.032766
Q6AYQ9	Peptidyl-prolyl cis-trans isomerase	Ppic	-5.56724e-07	0.0291743
D3ZPJ9		Ascc2	-5.59557e-07	0.00673773
F1LVM4		Ap3s2	-5.91558e-07	0.038766
D4ACW1		Nop2	-6.27008e-07	0.0399395
Q6AY23;D3ZXI0	Pyrroline-5-carboxylate reductase 2;Pyrroline-5-carboxylate reductase	Pycr2;Pycr1	-7.31394e-07	0.00438412
D4ABM3		Daam1	-8.76806e-07	0.0359358
Q3KRD5	Mitochondrial import receptor subunit TOM34	Tomm34	-9.14519e-07	0.0385415
F1LZN9		LOC100361574	-9.83128e-07	0.0449463
Q80WL2;M0RDF7	Bystin	Bysl	-9.94628e-07	0.0589248
Q5BJM8	Zinc transporter 7	Slc30a7	-1.03009e-06	0.0570213
D4AEG7		Tbc1d13	-1.18232e-06	0.0570507
D3ZFM1		Asf1a	-1.25044e-06	0.00565989
Q6VV72	Eukaryotic translation initiation factor 1A	Eif1a	-1.26701e-06	0.0317407
F1M0X7;F1M949		Ckap5	-1.43672e-06	0.045296
D3ZUJ5		Dtymk	-1.45191e-06	0.0410431
D3ZIH4		Fbxo4	-1.49587e-06	0.0438465
D3ZKU7	Biogenesis of lysosome-related organelles complex 1 subunit 1	Bloc1s1	-1.5221e-06	0.00641415
Q8K581;Q5M8C7	Thioredoxin domain-containing protein 9	Txndc9	-1.52735e-06	0.0201406
B0BNE3		Trappc5	-1.61048e-06	0.0214845
Q5PQT7	Pleckstrin homology-like domain family A member 3	Phlda3	-1.62635e-06	0.0431892
D3ZDR2		Chmp6	-1.78236e-06	0.0454443
Q5BJM7	CDC42 small effector protein 1	Cdc42se1	-1.81266e-06	0.0273696
D4A3V3		Parp12	-1.88454e-06	0.0116003
Q04970	GTPase NRas	Nras	-1.95091e-06	0.0160003
Q6AXW1-2;Q6AXW1	Glutaredoxin-2, mitochondrial	Glrx2	-1.98754e-06	0.0560285
O35849;P18424		Lcat	-2.04245e-06	0.0293731
Q4QR80	28S ribosomal protein S25, mitochondrial	Mrps25	-2.09294e-06	0.0579702
Q62740	Secreted phosphoprotein 24	Spp2	-2.20566e-06	0.0396877
Q499V0		Commd7	-2.22099e-06	0.0401787
D4A777;D4A5F0		Fam114a1;Fam114a1l1	-2.22206e-06	0.0152876
D4A181		Mettl13	-2.26935e-06	0.0325525
Q66HA7		Cbfb	-2.28426e-06	0.00403793
P62501;D3Z8M8	TSC22 domain family protein 1	Tsc22d1	-2.33946e-06	0.0246669
D3ZYT2		Mrps5	-2.35465e-06	0.0487651
Q6P798	RCC1 and BTB domain-containing protein 2	Rcbtb2	-2.37625e-06	0.0539661
D4A0W7		Fndc3b	-2.46991e-06	0.0326191
Q68FY1;M0RCF4	Nucleoporin NUP53	Nup35	-2.50069e-06	0.053288
D3ZSL2		Abracl	-2.55394e-06	0.0416966
Q63483		Rab38	-2.64134e-06	0.0198048
Z4YNG7;Q4V8B0;Q4V8B0-3;Q4V8B0-2	Oxidation resistance protein 1	Oxr1	-2.72012e-06	0.0236384
D3ZKR8;D3ZKT7		Tmem167a	-2.79002e-06	0.0405242
Q6IMX7	Hsp70-binding protein 1	Hspbp1	-2.86643e-06	0.0162306
Q9Z158	Syntaxin-17	Stx17	-2.93575e-06	0.0329482
P14056	Serine/threonine-protein kinase A-Raf	Araf	-2.94805e-06	0.0440178
P50116	Protein S100-A9	S100a9	-2.99937e-06	0.034692
G3V8B8		Dnajc7	-3.06752e-06	0.0233214
D3ZU54		Denr	-3.1394e-06	0.047089
Q5U2U2	Crk-like protein	Crkl	-3.1542e-06	0.0321232
Q4KLL0	Transcription elongation factor A protein 1	Tcea1	-3.19295e-06	0.0537235
Q5M807	E3 ubiquitin-protein ligase RNF5	Rnf5	-3.22164e-06	0.0202553
P55797;P55797-2	Apolipoprotein C-IV	Apoc4	-3.22209e-06	0.0346168
F1M3E3		LOC100361864	-3.39268e-06	0.0448387
D3ZXD8;D3ZR79	Transmembrane protein 245	Tmem245	-3.47437e-06	0.0579427
P02693	Fatty acid-binding protein, intestinal	Fabp2	-3.48961e-06	0.0490222
D4ADE8		Ddx3x	-3.51585e-06	0.037734
Q5U318	Astrocytic phosphoprotein PEA-15	Pea15	-3.52273e-06	5.86804e-05
D4A3S8		Nsun2	-3.52363e-06	0.05719
F1M8F4;Q80T18	Glia maturation factor gamma	Gmfg	-3.59832e-06	0.046953
B1WC02		Ctps	-3.60833e-06	0.0157026
D4ADM8		Rhod	-3.6612e-06	0.0342858
Q53AQ4	Transmembrane and ubiquitin-like domain-containing protein 1	Tmub1	-3.73048e-06	0.0146848
P54645	5-AMP-activated protein kinase catalytic subunit alpha-1	Prkaa1	-3.77088e-06	0.0249843
B2RYN3		Eef1e1	-3.81162e-06	0.00145875
D4A3J1		RGD1309079	-3.81162e-06	0.0126011
D3ZYK9		Npm3	-4.02166e-06	0.0234165
Q1H5H1;Q5PQZ8	Selenoprotein T	Selt	-4.02568e-06	0.0147394
Q7TP21		Rpa1	-4.24402e-06	0.0215121
D3ZP96		Mcm2	-4.54685e-06	0.00891732
Q6P6S4	Nucleotide exchange factor SIL1	Sil1	-4.57881e-06	0.0108487
B0K034		Dtd2	-4.57897e-06	0.0210923
P07308;D4ABJ9;Z4YNJ9;D3ZNA4;Q6P7B9;M0RDU8	Acyl-CoA desaturase 1	Scd1;Scd4	-4.58811e-06	0.00087886
D3ZQI1	Glutathione peroxidase	Gpx7	-4.67319e-06	0.00521335
G3V6U3		Alg2	-4.67877e-06	0.0260849
P13668;D3Z8V0;P21818	Stathmin	Stmn1	-4.69223e-06	0.00662773
P69736	Endothelial differentiation-related factor 1	Edf1	-4.85441e-06	0.0476353
Q66H39	ATP-binding cassette sub-family F member 3	Abcf3	-4.85759e-06	0.014657
O08697;G3V8V0	ADP-ribosylation factor-like protein 2	Arl2	-4.9193e-06	0.0511036
Q9QUR2-2;Q9QUR2	Dynactin subunit 4	Dctn4	-5.04336e-06	0.036462
Q5FWY5	AH receptor-interacting protein	Aip	-5.09851e-06	0.0277979
Q9JLT6	BH3-interacting domain death agonist;BH3-interacting domain death agonist p15;BH3-interacting domain death agonist p13;BH3-interacting domain death agonist p11	Bid	-5.26417e-06	0.0549095
Q68G38		Dyt1	-5.27818e-06	0.0132328
P84903	Stromal interaction molecule 1	Stim1	-5.35177e-06	0.0146356
M0R6J0		LOC684304	-5.42685e-06	0.0249715
F7ELI0		Drg1	-5.5364e-06	0.0264377
G3V828		Cnpy3	-5.54544e-06	9.1798e-06
P20171	GTPase HRas;GTPase HRas, N-terminally processed	Hras1	-5.5476e-06	0.0319736
Q5FVR5	Acyl-coenzyme A amino acid N-acyltransferase 2	Acnat2	-5.64893e-06	0.0328848
D4A0E2		Napg	-5.83032e-06	0.045217
D4A3K5	Histone H1.1	Hist1h1a	-5.84903e-06	0.0042899
Q64350	Translation initiation factor eIF-2B subunit epsilon	Eif2b5	-5.90351e-06	0.036971
F1LU27		Focad	-5.92312e-06	0.00122269
D3ZAR8		Otub2	-6.01628e-06	0.0530005
B0BN18	Prefoldin subunit 2	Pfdn2	-6.03016e-06	0.0460175
Q6P9U3	COMM domain-containing protein 3	Commd3	-6.0763e-06	0.0243619
Q5RJQ4	NAD-dependent protein deacetylase sirtuin-2	Sirt2	-6.19272e-06	0.0396808
P0C0A1	Vacuolar protein-sorting-associated protein 25	Vps25	-6.26203e-06	0.00934405
Q5XI97	Alanyl-tRNA editing protein Aarsd1	Aarsd1	-6.28951e-06	0.0277772
P83121	Urinary protein 3		-6.55183e-06	0.000241445
Q66HM7;D3ZLH9		Ssb;LOC680385	-6.57421e-06	0.0375026
F1LRE2;P35859	Insulin-like growth factor-binding protein complex acid labile subunit	Igfals	-6.62579e-06	0.0137239
F8WG91;P37996	ADP-ribosylation factor-like protein 3	Arl3	-6.66147e-06	2.91036e-05
Q6AYN8		Mcm7	-6.72759e-06	0.02398
D4ADF5;B1H286		LOC100912106	-6.80354e-06	0.0199356
Q3MHS3;Q6AYQ2		Akr1c1	-6.85101e-06	0.0561822
M0RCI5		Pla2g12b	-6.92843e-06	0.0158097
Q5RK24		Pmvk	-6.93992e-06	0.00276512
M0R4N4			-6.97089e-06	0.0196723
Q6MGA6;P28077	Proteasome subunit beta type;Proteasome subunit beta type-9	Psmb9	-6.99705e-06	0.0178624
B0K017		Adprhl2	-7.03376e-06	0.0497584
Q6AYB5	Signal recognition particle 54 kDa protein	Srp54	-7.06491e-06	0.0199195
Q5U3Y7	Transmembrane protein 97	Tmem97	-7.12105e-06	0.0406629
M0R7R1;F1LLV6		Ces1f	-7.19345e-06	0.0261557
Q499P8;G3V8P5	UPF0420 protein C16orf58 homolog	RGD1310127	-7.20962e-06	0.0424288
Q5XIE3	39S ribosomal protein L11, mitochondrial	Mrpl11	-7.34158e-06	0.012795
G3V784		Adpgk	-7.48558e-06	0.00683285
M0R7B4;P06349		LOC684828	-7.54372e-06	0.00453623
D4A4X4;F1M434		Cgn	-7.59539e-06	0.00932775
Q5U1Z0;D4ABP4;F1LMT8	Rab3 GTPase-activating protein non-catalytic subunit	Rab3gap2	-7.61147e-06	0.0384654
Q5M819	Phosphoserine phosphatase	Psph	-7.69026e-06	4.22787e-05
G3V617;P70618;Q56A33;P70618-2	Mitogen-activated protein kinase 14	Mapk14	-7.83578e-06	0.0360097
Q5I0L4	Cytosolic Fe-S cluster assembly factor NUBP1	Nubp1	-7.87202e-06	0.00224533
D4A0W1		Emc4	-8.03929e-06	0.000302143
P85515	Alpha-centractin	Actr1a	-8.0883e-06	0.0126841
F1LNT8;Q9WUF4	Vesicle-associated membrane protein 8	Vamp8	-8.19999e-06	0.0441126
D3ZPV8		Ggct	-8.30419e-06	0.0540523
D4AAW2;Q75N33	Protein transport protein Sec16B	Sec16b	-8.45888e-06	0.0460675
Q4V7A0	WD repeat-containing protein 61	Wdr61	-8.47857e-06	0.0479222
Q63644;D4A5S0;D3ZN37;Q63644-2	Rho-associated protein kinase 1	Rock1	-8.49097e-06	0.0304778
D4A6R4		LOC100362216	-8.67484e-06	0.0145066
P24389	Type I iodothyronine deiodinase	Dio1	-8.70305e-06	0.0209691
P63086	Mitogen-activated protein kinase 1	Mapk1	-8.74259e-06	0.0374186
D3ZV91		L3hypdh	-8.75253e-06	0.0330802
D4A1B8		Dctn3	-9.22936e-06	0.00117544
Q8R4A1;Q8R4A1-2;F8WFP9	ERO1-like protein alpha	Ero1l	-9.30994e-06	0.0401496
B5DF51	Membrane magnesium transporter 1	Mmgt1	-9.31975e-06	0.040466
O70513	Galectin-3-binding protein	Lgals3bp	-9.4372e-06	0.0211206
P08025;P08025-2;F8WFZ5	Insulin-like growth factor I	Igf1	-9.44302e-06	0.0147646
Q6P9U8;D3ZL77;M0RBU3	Eukaryotic translation initiation factor 3 subunit H	Eif3h;LOC362695	-9.44751e-06	0.0440927
Q6MGB4		Slc39a7	-9.49147e-06	0.0117986
P81827	Urinary protein 1		-9.56304e-06	0.000439684
Q66HG9	Mitochondrial antiviral-signaling protein	Mavs	-9.56793e-06	0.0387593
P82808;Q4KMC4	Glutamine--fructose-6-phosphate aminotransferase [isomerizing] 1	Gfpt1	-9.81754e-06	0.0429869
Q5FVN1	Starch-binding domain-containing protein 1	Stbd1	-9.89698e-06	0.00952545
P24008-2;G8JLS2;P24008	3-oxo-5-alpha-steroid 4-dehydrogenase 1	Srd5a1	-9.98157e-06	0.00759947
A1L1L2	Transmembrane protein 214	Tmem214	-1.00138e-05	0.00220584
P52632	Signal transducer and activator of transcription 5B	Stat5b	-1.03804e-05	0.0101731
Q5RK23	Abhydrolase domain-containing protein 1	Abhd1	-1.0404e-05	0.0175381
B2GUY2	Transferrin receptor protein 2	Tfr2	-1.04803e-05	0.016961
Q8CHN6	Sphingosine-1-phosphate lyase 1	Sgpl1	-1.04891e-05	0.0342453
Q63468;G3V7B5	Phosphoribosyl pyrophosphate synthase-associated protein 1	Prpsap1	-1.05849e-05	0.00133912
Q5M7A4	Ubiquitin-like modifier-activating enzyme 5	Uba5	-1.06483e-05	0.0065251
D3ZD89		Naa15	-1.06882e-05	0.00453456
D4ACG9		Abcg3	-1.08141e-05	0.0140479
P83941	Transcription elongation factor B polypeptide 1	Tceb1	-1.08183e-05	0.0446811
P61212	ADP-ribosylation factor-like protein 1	Arl1	-1.10082e-05	0.0418112
Q9QX69	LanC-like protein 1	Lancl1	-1.11496e-05	0.00945653
D3ZEA0		Fndc3a	-1.11698e-05	0.0403709
Q6AZ50	Ubiquitin-like-conjugating enzyme ATG3	Atg3	-1.14864e-05	0.00400603
D3ZFX4		Pgm3	-1.15422e-05	0.0240597
Q6P7P5	Basic leucine zipper and W2 domain-containing protein 1	Bzw1	-1.16969e-05	0.00700591
Q5HZV9;R9PXV7	Protein phosphatase 1 regulatory subunit 7	Ppp1r7	-1.23064e-05	0.0050743
D4A9Y0		Sdf2l1	-1.25145e-05	0.0206582
O70593	Small glutamine-rich tetratricopeptide repeat-containing protein alpha	Sgta	-1.27589e-05	0.0278023
Q923V8	15 kDa selenoprotein	42248	-1.2949e-05	0.0103493
Q4KM08;F1LPJ9		Abcg3l1	-1.33232e-05	0.0285781
Q5RK09	Eukaryotic translation initiation factor 3 subunit G	Eif3g	-1.35183e-05	0.0327115
D4ABY2	Coatomer subunit gamma	Copg2	-1.37115e-05	0.0315569
O35821	Myb-binding protein 1A	Mybbp1a	-1.39536e-05	0.00346441
O88202	60 kDa lysophospholipase;L-asparaginase;Platelet-activating factor acetylhydrolase	Aspg	-1.39677e-05	0.0492278
P49088	Asparagine synthetase [glutamine-hydrolyzing]	Asns	-1.41125e-05	0.0334958
D4A7R0	Signal recognition particle subunit SRP72	LOC100910272	-1.42728e-05	0.0121979
D4AAE9		Cisd2	-1.4324e-05	0.0524797
P47875	Cysteine and glycine-rich protein 1	Csrp1	-1.44403e-05	0.00289676
G3V7V5	Peptidyl-prolyl cis-trans isomerase	Fkbp11	-1.44571e-05	0.00665129
Q6AYH5	Dynactin subunit 2	Dctn2	-1.49009e-05	0.028595
D4A2Z6		Sec63	-1.50697e-05	0.020139
B2GUZ5	F-actin-capping protein subunit alpha-1	Capza1	-1.50812e-05	0.0317227
F1LZ05		Parp14	-1.52404e-05	0.021782
D3ZCT7		Sec23b	-1.5327e-05	0.0540623
Q3KRC3		Srpr	-1.56387e-05	0.00274101
Q6P6T9;M0R7I0;F1M4P1;F1M7J0;F1M3X9	Importin subunit alpha	Kpna2;LOC100359600	-1.57276e-05	0.012466
Q5U2U5		Plin2	-1.59222e-05	0.000194615
Q6PEC4	S-phase kinase-associated protein 1	Skp1	-1.59575e-05	0.0461262
A0JPM9;F1M0W4	Eukaryotic translation initiation factor 3 subunit J	Eif3j	-1.60625e-05	0.0107482
Q5XIU9	Membrane-associated progesterone receptor component 2	Pgrmc2	-1.66197e-05	0.0128705
F1LM22		Ugt2b15	-1.69187e-05	0.00899054
P04961	Proliferating cell nuclear antigen	Pcna	-1.69709e-05	0.0456049
P63281	SUMO-conjugating enzyme UBC9	Ube2i	-1.70441e-05	0.0299823
D3ZMY7;F1M0C1		Nt5c2	-1.73723e-05	0.0535256
Q6AYF8;M0R455		Serpinb9	-1.75282e-05	0.0297878
A0JPQ9;Q7TP14	Chitinase domain-containing protein 1	Chid1	-1.80242e-05	0.017922
Q03555-6;Q03555-4;Q03555-3;Q03555-5;Q03555;Q03555-2;F1MA86;F1LN62;M0R423	Gephyrin;Molybdopterin adenylyltransferase;Molybdopterin molybdenumtransferase	Gphn	-1.8029e-05	0.0125342
P52925;D3ZN59;D3ZS25;D3ZA18;D3ZWY0;M0R6W6	High mobility group protein B2	Hmgb2;LOC100911856;RGD1561694	-1.83327e-05	0.0531378
Q5XIG8;M0RCV0	Serine-threonine kinase receptor-associated protein	Strap;LOC100910575	-1.85582e-05	0.005946
P08661;Q7TMC0	Mannose-binding protein C	Mbl2	-1.89325e-05	0.000135808
Q63569;Q6P6U2	26S protease regulatory subunit 6A	Psmc3	-1.9176e-05	0.0566406
Q4V8J5		Ddi2	-1.91804e-05	0.00615258
Q99MZ8	LIM and SH3 domain protein 1	Lasp1	-1.97545e-05	0.0292611
Q5FVR2	Thymidine phosphorylase	Tymp	-1.98516e-05	0.0559329
P13721;G3V680;P13721-3;D4ABR2;P13721-2;F2Z3S3	Beta-galactoside alpha-2,6-sialyltransferase 1	St6gal1	-2.01697e-05	0.0255861
D4A9N5		Trim25	-2.01888e-05	0.0217713
Q5M9H7;O35824	DnaJ homolog subfamily A member 2	Dnaja2	-2.08245e-05	0.00856393
P60892;M0RBK1	Ribose-phosphate pyrophosphokinase 1;Ribose-phosphate pyrophosphokinase	Prps1;Prps1l1	-2.12745e-05	0.0304714
Q4QQS7		Umps	-2.14216e-05	0.0163925
Q6DGG0;M0RB67;F1M315;D3ZKJ9	Peptidyl-prolyl cis-trans isomerase D	Ppid;Ppidl1	-2.16322e-05	0.00395585
D3ZAZ0	Eukaryotic translation initiation factor 3 subunit M	Eif3m	-2.18113e-05	0.0594402
F1LSL1;Q68A21;D3ZYS1	Transcriptional activator protein Pur-beta	Purb	-2.22273e-05	0.0139247
P02761;F7FIH7;M0R620;Q9JJH9;E9PT15;D4A774;M3ZCQ1;F6PTN9;F8WFF8;F1LXE5;Q9JJI3;F1M6Y6;M0RBS2	Major urinary protein;15.5 kDa fatty acid-binding protein	LOC100909412	-2.27297e-05	0.0112981
Q641Y8	ATP-dependent RNA helicase DDX1	Ddx1	-2.3004e-05	0.0355081
P52944	PDZ and LIM domain protein 1	Pdlim1	-2.31509e-05	0.0418606
Q9JI85;G3V8R1	Nucleobindin-2;Nesfatin-1	Nucb2	-2.38479e-05	0.00807887
Q4KM74	Vesicle-trafficking protein SEC22b	Sec22b	-2.39975e-05	0.0046013
G3V9K0		Cars	-2.45134e-05	0.00405386
Q5U3Y8;M0R5M7;M0RB86		Btf3;RGD1563812	-2.52275e-05	0.038547
P24051	40S ribosomal protein S27-like	Rps27l	-2.55286e-05	0.0336932
Q9JMJ4	Pre-mRNA-processing factor 19	Prpf19	-2.55782e-05	0.0421293
G3V9S9		Sec24d	-2.5586e-05	0.0462851
P52844	Estrogen sulfotransferase, isoform 1	Sult1e1	-2.5967e-05	0.0434345
Q5U2V4	Phospholipase B-like 1	Plbd1	-2.59841e-05	0.00243604
G3V9J1;F1LP69		LOC297568	-2.61153e-05	0.0185093
Q9QYU4;M0RAD1	Thiomorpholine-carboxylate dehydrogenase	Crym	-2.62065e-05	0.0358201
D3ZN21;F1LQD1;Q64060		RGD1309586	-2.63186e-05	0.0407184
M0RCS2		LOC686610	-2.65487e-05	0.0125576
A0JPJ7	Obg-like ATPase 1	Ola1	-2.67675e-05	0.00335552
Q5XIC1	Mannose-1-phosphate guanyltransferase alpha	Gmppa	-2.6897e-05	0.0113605
B2RZA9		Ube2l3	-2.73826e-05	0.00666671
Q68FT7		Farsb	-2.80533e-05	0.0386396
Q6AYI1		Ddx5	-2.85035e-05	0.0555468
Q505J8	Phenylalanine--tRNA ligase alpha subunit	Farsa	-2.86954e-05	0.0297744
Q5U2Q7	Eukaryotic peptide chain release factor subunit 1	Etf1	-2.87815e-05	0.00391688
Q76EQ0	Serine racemase	Srr	-2.87972e-05	0.00954569
O88321		Psmd4	-2.98146e-05	0.0281114
Q99MI5		Srm	-3.03954e-05	0.0225208
G3V7L6;Q63347	26S protease regulatory subunit 7	Psmc2	-3.06615e-05	0.00903881
F7F469		Igtp	-3.09437e-05	0.000347618
B0BN63		LOC681996	-3.1526e-05	0.00430471
O35987	NSFL1 cofactor p47	Nsfl1c	-3.22532e-05	0.00405488
Q5U211;M0RAM2	Sorting nexin-3	Snx3	-3.22638e-05	0.0150215
G3V9N0;D3ZSR2		Pabpc4	-3.24634e-05	0.0116911
Q3B7U9	Peptidyl-prolyl cis-trans isomerase FKBP8	Fkbp8	-3.29976e-05	0.000890312
F1LU48		Ergic1	-3.37318e-05	0.0180455
Q6AY18		Sar1a	-3.3961e-05	0.0115139
P68101	Eukaryotic translation initiation factor 2 subunit 1	Eif2s1	-3.43387e-05	0.0119149
Q5FVQ6;M0RAS6;J7PDL5;M0R4L5;D4A2T4		MGC108823;LOC100910979	-3.45629e-05	0.001261
Q5XIM7	Lysine--tRNA ligase	Kars	-3.49076e-05	0.0283873
G3V679;Q99376	Transferrin receptor protein 1	Tfrc	-3.49746e-05	0.0335855
P15149;Z4YNS8	Cytochrome P450 2A2	Cyp2a2	-3.6521e-05	0.0415847
B5DFC8	Eukaryotic translation initiation factor 3 subunit C	Eif3c	-3.68235e-05	0.0091201
Q642E2;P17702;D3ZJD3;D3ZEI0	60S ribosomal protein L28	Rpl28;RGD1565183;LOC690096	-3.69983e-05	0.00642077
D4ACV3;P0CC09;P02262	Histone H2A;Histone H2A type 2-A;Histone H2A type 1	Hist2h2ac;Hist2h2aa3	-3.72395e-05	0.0260886
Q3KRE8	Tubulin beta-2B chain	Tubb2b	-3.75372e-05	0.0259266
P09456	cAMP-dependent protein kinase type I-alpha regulatory subunit;cAMP-dependent protein kinase type I-alpha regulatory subunit, N-terminally processed	Prkar1a	-3.7673e-05	0.00813197
Q63570	26S protease regulatory subunit 6B	Psmc4	-3.83717e-05	0.0208371
Q6PDV7;D4A1P2	60S ribosomal protein L10	Rpl10;Rpl10l	-3.84911e-05	0.0549223
B0BNA7;M0RCH0	Eukaryotic translation initiation factor 3 subunit I	Eif3i	-3.90275e-05	0.00136681
P63036	DnaJ homolog subfamily A member 1	Dnaja1	-3.93701e-05	0.0263257
P18666	Myosin regulatory light chain 12B	Myl12b	-3.94272e-05	0.0171035
A0JN30		Cnpy2	-4.01525e-05	0.0133357
P40329	Arginine--tRNA ligase, cytoplasmic	Rars	-4.2078e-05	0.00227546
Q6AYU5;D4ADH2;F1M8T3;D4A8D6		Pcbp2	-4.26825e-05	0.00510339
P11715	Steroid 17-alpha-hydroxylase/17,20 lyase	Cyp17a1	-4.38964e-05	0.0488198
P62268;D4A9Q3;F1LTW8	40S ribosomal protein S23	Rps23;RGD1563570;RGD1563705	-4.40157e-05	0.00823966
O88637-2;O88637	Ethanolamine-phosphate cytidylyltransferase	Pcyt2	-4.44379e-05	0.0131497
Q8VID1	Dehydrogenase/reductase SDR family member 4	Dhrs4	-4.45955e-05	0.0538615
D4A746		Gmppb	-4.49806e-05	0.000613739
G3V6K6;M0R4L1;P06494;F1LRR9;Q8K3F9;E9PTH1;F1M7X4;Q62956-2;Q62956		Egfr	-4.73249e-05	0.00185638
Q4V7C7;F1LY09	Actin-related protein 3	Actr3	-4.80148e-05	0.00733298
P62912;D4A412;D3ZK70;D4A8R0	60S ribosomal protein L32	Rpl32;LOC688684	-4.84516e-05	0.0343328
O35814;R9PXW7	Stress-induced-phosphoprotein 1	Stip1	-4.93925e-05	0.0348433
Q4G061	Eukaryotic translation initiation factor 3 subunit B	Eif3b	-4.94185e-05	0.0269677
Q6TUG0	DnaJ homolog subfamily B member 11	Dnajb11	-4.94483e-05	0.0171082
O35826	Bifunctional UDP-N-acetylglucosamine 2-epimerase/N-acetylmannosamine kinase;UDP-N-acetylglucosamine 2-epimerase (hydrolyzing);N-acetylmannosamine kinase	Gne	-4.94654e-05	0.0190293
P41542	General vesicular transport factor p115	Uso1	-5.07308e-05	0.0265823
P08430;Q64634	UDP-glucuronosyltransferase 1-6	Ugt1a6	-5.07395e-05	0.00557619
D3ZZC1		Txndc5	-5.20117e-05	0.0240354
P48199	C-reactive protein	Crp	-5.22911e-05	0.00986414
P62961;F1LPL7;Q3ZAV2;F1M0E9;D3ZLV8;D4A3P0;D3ZLV3;F1M2W5;M0RC93	Nuclease-sensitive element-binding protein 1	Ybx1;LOC100912427	-5.23956e-05	0.052034
P70470	Acyl-protein thioesterase 1	Lypla1	-5.32025e-05	0.0182769
Q3B7D0	Coproporphyrinogen-III oxidase, mitochondrial	Cpox	-5.36618e-05	0.0290548
G3V7G8;Q5I0G4	Glycine--tRNA ligase	Gars	-5.40449e-05	0.0148682
P15178	Aspartate--tRNA ligase, cytoplasmic	Dars	-5.41054e-05	0.004404
P62850-2;P62850-3;P62850;D4ACJ1;D3ZFZ8	40S ribosomal protein S24	Rps24;LOC100363469	-5.41716e-05	0.00989127
Q6IRK9	Carboxypeptidase Q	Cpq	-5.5164e-05	0.0157251
D4AD15;D3ZU13;M0RD03;F1LV74		LOC680559;LOC100911431	-5.52365e-05	0.00991087
Q66HA8	Heat shock protein 105 kDa	Hsph1	-5.53873e-05	0.0314122
Q63010	Liver carboxylesterase B-1		-5.54333e-05	0.00174968
O88600;F1LRV4	Heat shock 70 kDa protein 4	Hspa4	-5.69479e-05	0.0206623
E9PSV5		Psat1	-5.74914e-05	0.0238159
Q3T1L0	Aldehyde dehydrogenase family 16 member A1	Aldh16a1	-5.8742e-05	0.00258377
P80067	Dipeptidyl peptidase 1;Dipeptidyl peptidase 1 exclusion domain chain;Dipeptidyl peptidase 1 heavy chain;Dipeptidyl peptidase 1 light chain	Ctsc	-5.9357e-05	0.038688
B1WC34		Prkcsh	-6.28568e-05	0.00108388
Q5XFW8	Protein SEC13 homolog	Sec13	-6.29449e-05	0.00896631
D4ABM1;P05179	Cytochrome P450 2C7	LOC100361547;Cyp2c7	-6.50636e-05	0.00338604
E2RUH2;P29315	Ribonuclease inhibitor	LOC100360501;Rnh1	-6.79525e-05	0.0139081
P18445;D3ZF07;D4AAY6;D3ZI60;F1M5H4;D3ZG03;D3ZVI3;F1LVD0	60S ribosomal protein L27a	Rpl27a;RGD1562402;RGD1559972;RGD1561984	-6.81907e-05	0.00417011
Q4KM73	UMP-CMP kinase	Cmpk1	-6.91108e-05	0.0392467
P07953;P07953-2;F1M7B7;F7FKL9;P25114;O35552-8;O35552-5;O35552-6;O35552-4;O35552-7;O35552-2;O35552-3;O35552;R9PXY6;Q9JJH5-4;Q9JJH5-2;Q9JJH5-3;Q9JJH5	6-phosphofructo-2-kinase/fructose-2,6-bisphosphatase 1;6-phosphofructo-2-kinase;Fructose-2,6-bisphosphatase	Pfkfb1	-7.2007e-05	0.00891104
P83732;M0RBD1	60S ribosomal protein L24	Rpl24	-7.26745e-05	0.00762736
B5DFH4;F1LX70		Papss2	-7.2976e-05	0.00418989
Q9EPH8;B5DF80;D4A5H0	Polyadenylate-binding protein 1	Pabpc1	-7.46121e-05	0.036654
Q9QZA2	Programmed cell death 6-interacting protein	Pdcd6ip	-7.50554e-05	0.0435025
P02706	Asialoglycoprotein receptor 1	Asgr1	-7.50891e-05	0.0327896
Q6P6S9;F1LPB8	Ectonucleoside triphosphate diphosphohydrolase 5	Entpd5	-7.73556e-05	0.0474384
P0C5H9	Mesencephalic astrocyte-derived neurotrophic factor	Manf	-8.26119e-05	0.0363968
B2RZ72		Arpc4	-8.64686e-05	0.0054855
Q5RJR9;P29457	Serpin H1	Serpinh1	-8.80418e-05	0.000695117
P09139-2;P09139	Serine--pyruvate aminotransferase, mitochondrial	Agxt	-8.89123e-05	0.027355
P11497;P11497-2	Acetyl-CoA carboxylase 1;Biotin carboxylase	Acaca	-9.03746e-05	0.0299685
P97584	Prostaglandin reductase 1	Ptgr1	-9.15394e-05	0.0330529
D3ZCS9		LOC100911028	-9.24399e-05	0.00879738
Q9QVC8	Peptidyl-prolyl cis-trans isomerase FKBP4;Peptidyl-prolyl cis-trans isomerase FKBP4, N-terminally processed	Fkbp4	-9.38884e-05	0.00010916
Q68FT9	Selenocysteine lyase	Scly	-9.42489e-05	2.69944e-05
D3ZCI0;Q63060;Q68FP7;D3Z8F7	Glycerol kinase	Gk	-0.000101193	0.00125262
Q5VLR5		Erp44	-0.000103164	0.00866215
P28480	T-complex protein 1 subunit alpha	Tcp1	-0.000103293	0.0136256
Q9R0T3	DnaJ homolog subfamily C member 3	Dnajc3	-0.000103908	0.0201831
Q63584	Transmembrane emp24 domain-containing protein 10	Tmed10	-0.000106227	0.0294678
Q68FQ0	T-complex protein 1 subunit epsilon	Cct5	-0.000106395	0.00889705
F1M5X1;F1M853;M0RCU2;M0RBV3;M0RBS6		Rrbp1	-0.000106719	0.0422724
O55215;E9PT76;P27952;D3ZQW7;M0R865;D3ZIY7;G3V957;D3ZT78;M0RAJ8;D4A577;D3ZQ72;E9PTW0;F1LVB4;F1LUE4;D3ZW87;F1LVD1	40S ribosomal protein S2	Rps2-ps6;Rps2;LOC688473;LOC100359960	-0.000107485	0.0216567
P52555;F1M259	Endoplasmic reticulum resident protein 29	Erp29	-0.000108475	0.0311151
P17077;M0RBD4;F1M7A9;M0R6B4;M0R5Y8;F1M2X8;D3ZZQ7;F1LX84;D3ZL18;D3ZA49;M0RCL2	60S ribosomal protein L9	Rpl9;LOC100911472;RGD1561928;LOC100910002	-0.000108918	0.017874
B0BNG3		Lman2	-0.000111329	0.0108542
Q7TP48;D3ZGQ3;Q7TP48-2	Adipocyte plasma membrane-associated protein	Apmap	-0.000111783	0.00369396
Q5XHY5	Threonine--tRNA ligase, cytoplasmic	Tars	-0.000117135	3.59511e-05
Q3MHS9;D3ZZG6;Q6AYJ7;M0R800;D4AD79		Cct6a	-0.000119944	0.0279813
P41034	Alpha-tocopherol transfer protein	Ttpa	-0.000121493	0.0483719
P62282;M0R8X3;M0R626	40S ribosomal protein S11	Rps11	-0.000121771	0.0197308
P04644;D3ZFA8;D3ZHU9;D3ZKG6;M0R8M8;D3ZL23;F1M5B1;D3ZM01;F1M238	40S ribosomal protein S17	Rps17;LOC100364909;LOC100361180;RGD1559955	-0.000126659	0.0283476
P63029;M0R8Q2;M0R4R1	Translationally-controlled tumor protein	Tpt1;LOC100360791	-0.000127704	0.0424137
Q66HK8;P33274	Cytochrome P450 4F1	Cyp4f1	-0.000128279	0.02231
P55053	Fatty acid-binding protein, epidermal	Fabp5	-0.000131014	0.0232466
Q07984;M0R4H9	Translocon-associated protein subunit delta	Ssr4	-0.000132187	0.0382673
Q5I0M4;F1LXN7		Akr1c12	-0.000134596	0.0102957
P84079;P61206;M0R3K0	ADP-ribosylation factor 1;ADP-ribosylation factor 3	Arf1;Arf3	-0.000134973	0.0143142
Q5RJR8	Leucine-rich repeat-containing protein 59	Lrrc59	-0.000136048	0.0514811
Q9JLA3	UDP-glucose:glycoprotein glucosyltransferase 1	Uggt1	-0.000136296	0.0517246
Q6P502	T-complex protein 1 subunit gamma	Cct3	-0.000137427	0.00436992
P69897;P69897-2	Tubulin beta-5 chain	Tubb5	-0.000143675	0.00100951
Q5XIM9	T-complex protein 1 subunit beta	Cct2	-0.000143801	0.0140215
F7FLF2;P47198	60S ribosomal protein L22	Rpl22	-0.000144767	0.0369269
Q6PDW1;M0R9I8;D3ZHB3;P63324;D3ZG05;D3ZV36	40S ribosomal protein S12	Rps12;LOC100364427;LOC100360573	-0.000145212	0.0300947
D4ACB8		Cct8	-0.000145342	0.00344876
P50503	Hsc70-interacting protein	St13	-0.000146202	0.001181
Q7TPB1	T-complex protein 1 subunit delta	Cct4	-0.000148299	0.00448432
Q07071	Glucokinase regulatory protein	Gckr	-0.000149936	0.0193232
P62914	60S ribosomal protein L11	Rpl11	-0.000152562	0.00062475
Q6P3V8		Eif4a1	-0.00015543	0.0329765
P62250;M0RCH1;M0R662;M0R8S7;M0R4I3	40S ribosomal protein S16	Rps16	-0.000155886	0.0098376
P35565	Calnexin	Canx	-0.0001583	0.0477853
Q3KRF2;Q9Z1A6	Vigilin	Hdlbp	-0.000162867	0.00738178
Q8CG45	Aflatoxin B1 aldehyde reductase member 2	Akr7a2	-0.000163051	0.0103009
O08651;M0RD29;D3ZI15	D-3-phosphoglycerate dehydrogenase	Phgdh	-0.000163307	0.00876227
P23358;D3ZJE2;D4A8N3;M0RD35;F1LY34	60S ribosomal protein L12	Rpl12;Rpl12-ps1	-0.000164416	0.0239965
Q68FP2	Serum paraoxonase/lactonase 3	Pon3	-0.000170841	0.0109471
D3ZFJ2			-0.000174253	0.0218376
P17078;D3ZN79;F1M6G3;D3Z942	60S ribosomal protein L35	Rpl35;LOC686074	-0.000177582	0.0232111
Q6TXE9		Eprs	-0.000180308	0.00299683
P62907;D4A7Y6;F1LYQ7;D3ZBX4;D3Z9F6	60S ribosomal protein L10a;Ribosomal protein	Rpl10a;RGD1566137;LOC680700	-0.000185931	0.0398168
P10868;G3V960	Guanidinoacetate N-methyltransferase	Gamt	-0.000186547	0.00277769
P62755;M0RD75;M0R4Q3;M0RA03	40S ribosomal protein S6	Rps6	-0.000200678	0.053523
P62271;M0R5K9;D3ZM33;D3ZII2;D3ZAU6;F1M6D1;D4AA93	40S ribosomal protein S18	Rps18;LOC100912024;LOC100362298;RGD1562404	-0.000202663	0.0301652
F1LN18;Q63617	Hypoxia up-regulated protein 1	Hyou1	-0.000207941	0.0043628
P14173;D3ZMA5	Aromatic-L-amino-acid decarboxylase	Ddc	-0.000208106	0.00136103
P24368	Peptidyl-prolyl cis-trans isomerase B	Ppib	-0.000208237	0.0562471
B0BN46		Grhpr	-0.000208327	0.040148
P06214;M0RDE7	Delta-aminolevulinic acid dehydratase	Alad	-0.000212013	0.0579912
P70712	Kynureninase	Kynu	-0.000212256	0.000848107
P62853;F1M6F4;M0R763;D4AE10	40S ribosomal protein S25	Rps25;RGD1564597;LOC100911337	-0.000213098	0.0309838
Q499Q4;P38652	Phosphoglucomutase-1	Pgm1	-0.000214889	0.0132882
D3ZTP0;M0RA88		Aldh1l2	-0.000215258	0.00686795
Q68FT5;F1LMG2	S-methylmethionine--homocysteine S-methyltransferase BHMT2	Bhmt2	-0.00021569	0.0158887
P50399;F1LWU5	Rab GDP dissociation inhibitor beta	Gdi2	-0.000223627	0.00514009
P38659;G3V6T7	Protein disulfide-isomerase A4	Pdia4	-0.000224136	0.00793955
P62278;M0RCY2;M0RBC7;M0R6B8;D3ZW86	40S ribosomal protein S13	Rps13;LOC683961	-0.00022755	0.00352519
P62752;F1LT35;D3ZTH8;D3ZNM1;D4AAL7;D3ZFK7;D3ZTX9;F1M1E5;D3ZSR8;M0RE17;M0R9M8	60S ribosomal protein L23a	Rpl23a;RGD1564606;LOC689899;RGD1562755;LOC688776;LOC690335	-0.000229817	0.00935209
F1M013;P62425;D3ZU22;D3ZPL5;D3ZWM2;D3ZJH5;D4A6B9;F1M4C7;F1M0S7;F1M1M2;M0RDP4;F1M2Q3;D4A2J1;F1M300;M0R3M3;M0R6L1;D3ZD15;M0R9T3;F1LU72;F1LV49;F1M4Z6;F1LUI8;F1M394;M0R8F6;F1M0R8;Q7TQ86;M0R995;D4A479;F1LYF6;D3ZVY2;F1M3Q8	60S ribosomal protein L7a	LOC100910109;Rpl7a;RGD1562953;RGD1559149;RGD1562409;LOC680161	-0.000232392	0.0522027
Q66X93;D4A8Y5	Staphylococcal nuclease domain-containing protein 1	Snd1	-0.000235938	0.0130548
H7C5Y5;P21533;F1LQS3;F1LVJ5;F1M2R6;F1LUV7	60S ribosomal protein L6	Rpl6	-0.00023825	0.00110741
P09895;D3ZET5;D3ZHP8	60S ribosomal protein L5	Rpl5;Rpl5l1	-0.000243574	0.0458819
Q6PDV6;P13471;F1MA00;D4A290	40S ribosomal protein S14	Rps14	-0.000255393	0.0344464
P51635	Alcohol dehydrogenase [NADP(+)]	Akr1a1	-0.000276886	0.021666
Q63150	Dihydropyrimidinase	Dpys	-0.000279328	0.0391781
P61354;D3ZTK5;D4AD41;M0R7P0;D4A7I3;D4A7W3	60S ribosomal protein L27	Rpl27;RGD1563835;Rpl27-l1;LOC100912027	-0.000287553	0.00374212
P68370;Q68FR8;M0R5B4	Tubulin alpha-1A chain;Tubulin alpha-3 chain	Tuba1a;Tuba3a	-0.000295463	0.0532132
P62243;M0R7Q5;Q6TXJ0;D3ZIE1	40S ribosomal protein S8	Rps8;LOC100363452;LOC297756;RGD1566369	-0.000301342	0.0409849
P52847	Sulfotransferase family cytosolic 1B member 1	Sult1b1	-0.000302775	0.0104583
G3V6C2		Hgd	-0.000303123	0.0482194
P50237;M0RAL6;G3V9R3;M0R9X0	Sulfotransferase 1C1	Sult1c1	-0.000323086	0.0037134
P08541	UDP-glucuronosyltransferase 2B2	Ugt2b	-0.000351323	0.0176775
Q6P3V9;P50878	60S ribosomal protein L4	Rpl4	-0.000353247	0.00694139
P38983;F1M8X2	40S ribosomal protein SA	Rpsa	-0.000370006	0.0150734
Q07523	Hydroxyacid oxidase 2	Hao2	-0.000376859	8.26874e-07
P19945;D3ZJT4;M0R542;D3ZAV9;F1LWD6	60S acidic ribosomal protein P0	Rplp0	-0.000377154	0.0182049
Q5XIF6	Tubulin alpha-4A chain	Tuba4a	-0.000488106	0.031923
Q03248;D3Z8J1	Beta-ureidopropionase	Upb1	-0.000504957	0.0220853
G3V888;G3V9G4;P16638;P16638-2	ATP-citrate synthase	Acly	-0.000535213	0.00870978
P36511	UDP-glucuronosyltransferase 2B15	Ugt2b15	-0.000535685	0.00307507
G3V7C6;Q6P9T8	Tubulin beta-4B chain	Tubb4b	-0.000562749	0.0181859
P49889	Estrogen sulfotransferase, isoform 3	Ste	-0.000582189	0.0374398
P13107	Cytochrome P450 2B3	Cyp2b3	-0.00060262	0.0118456
P08683	Cytochrome P450 2C11	Cyp2c11	-0.00063116	0.000196489
P02767	Transthyretin	Ttr	-0.000669368	0.0518878
Q64573	Liver carboxylesterase 4	Ces4	-0.000701915	0.00555769
G3V9W6;P30839;P11883	Aldehyde dehydrogenase;Fatty aldehyde dehydrogenase	Aldh3a2	-0.000716723	0.00277191
P23457;P51652;D3ZEL2	3-alpha-hydroxysteroid dehydrogenase	Akr1c9	-0.000724657	0.0506278
P63018;M0RCB1;F1LZI1;D4A4S3;M0RDZ9	Heat shock cognate 71 kDa protein	Hspa8;LOC680121	-0.000728899	0.00833237
P05197	Elongation factor 2	Eef2	-0.000767774	0.00208396
B0BNF9	Hydroxyacid oxidase 1	Hao1	-0.00078927	6.14268e-05
P18418;F1M5A1;D3ZYM6	Calreticulin	Calr	-0.000806424	0.000421095
Q63081	Protein disulfide-isomerase A6	Pdia6	-0.000845993	1.71213e-05
P04176	Phenylalanine-4-hydroxylase	Pah	-0.000904892	0.0174977
P41562	Isocitrate dehydrogenase [NADP] cytoplasmic	Idh1	-0.000928306	8.38055e-05
P04764;M0R5J4;D3ZYU0;F1M2K7;D4A0Q2	Alpha-enolase	Eno1	-0.00100275	0.0337496
P12785	Fatty acid synthase;[Acyl-carrier-protein] S-acetyltransferase;[Acyl-carrier-protein] S-malonyltransferase;3-oxoacyl-[acyl-carrier-protein] synthase;3-oxoacyl-[acyl-carrier-protein] reductase;3-hydroxyacyl-[acyl-carrier-protein] dehydratase;Enoyl-[acyl-carrier-protein] reductase;Oleoyl-[acyl-carrier-protein] hydrolase	Fasn	-0.00107041	0.0276847
P10634	Cytochrome P450 2D26	Cyp2d26	-0.00115519	0.000417505
P12928-2;P12928	Pyruvate kinase PKLR	Pklr	-0.00116504	0.000266679
P19112;F1LRT1;Q9Z1N1	Fructose-1,6-bisphosphatase 1	Fbp1	-0.00121865	0.0193588
Q66HD0;Q66HD0-2	Endoplasmin	Hsp90b1	-0.00128793	0.00174865
P06761	78 kDa glucose-regulated protein	Hspa5	-0.00156289	0.0130908
P11598	Protein disulfide-isomerase A3	Pdia3	-0.00159123	0.000110201
P04785	Protein disulfide-isomerase	P4hb	-0.00162143	0.00129261
P34058;F1LTA7;F1M2F7;F1LYW7;D3ZNW2	Heat shock protein HSP 90-beta	Hsp90ab1	-0.00187558	0.0015649
Q03336	Regucalcin	Rgn	-0.00212251	0.00292729
P62630;M0R757;F1M6C2;M0RAS8;D3ZA96;D4A0X4	Elongation factor 1-alpha 1;Elongation factor 1-alpha	Eef1a1;LOC100360413;LOC100360150	-0.00218014	0.0574544
P04762	Catalase	Cat	-0.00283924	0.0497698
P02692	Fatty acid-binding protein, liver	Fabp1	-0.00298769	0.0254352
P04642;M0RBY5;M0RCF2;D4AD97;Q6AYX2;P19629	L-lactate dehydrogenase A chain	Ldha	-0.00342232	0.0274865

## Sheet: Sheet2
Protein IDs	Protein names	Gene names	Mean mass fraction (CU-RES)	T-test (CU-RES)
P12785	Fatty acid synthase;[Acyl-carrier-protein] S-acetyltransferase;[Acyl-carrier-protein] S-malonyltransferase;3-oxoacyl-[acyl-carrier-protein] synthase;3-oxoacyl-[acyl-carrier-protein] reductase;3-hydroxyacyl-[acyl-carrier-protein] dehydratase;Enoyl-[acyl-carrier-protein] reductase;Oleoyl-[acyl-carrier-protein] hydrolase	Fasn	0.00704238	0.000425781
P32755	4-hydroxyphenylpyruvate dioxygenase	Hpd	0.00337972	2.3455e-05
Q7TMC7		Tf	0.00252034	0.0013529
P62630	Elongation factor 1-alpha 1;Elongation factor 1-alpha	Eef1a1;LOC100360413;LOC100360150	0.00252031	0.00165019
G3V888	ATP-citrate synthase	Acly	0.00247938	9.6188e-05
P34058	Heat shock protein HSP 90-beta	Hsp90ab1	0.00202984	0.000865491
P63018	Heat shock cognate 71 kDa protein	Hspa8;LOC680121	0.00155234	0.00283867
P05197	Elongation factor 2	Eef2	0.00154492	0.00155429
Q9EQS4	Cystathionine gamma-lyase	Cth	0.00121167	0.0189782
P04176	Phenylalanine-4-hydroxylase	Pah	0.0011371	0.0256782
P05369	Farnesyl pyrophosphate synthase	Fdps;LOC100360417	0.000991637	0.0058239
P04785	Protein disulfide-isomerase	P4hb	0.000989589	0.0260739
P06761	78 kDa glucose-regulated protein	Hspa5	0.000955173	0.0445121
Q66HD0	Endoplasmin	Hsp90b1	0.000865355	0.028935
Q4KLZ6	Bifunctional ATP-dependent dihydroxyacetone kinase/FAD-AMP lyase (cyclizing);ATP-dependent dihydroxyacetone kinase;FAD-AMP lyase (cyclizing)	Dak	0.000845541	0.00806309
P12928	Pyruvate kinase PKLR	Pklr	0.000744317	0.000723226
P17425	Hydroxymethylglutaryl-CoA synthase, cytoplasmic	Hmgcs1	0.00068933	5.19533e-05
P18418	Calreticulin	Calr	0.000583624	0.00197683
P38983	40S ribosomal protein SA	Rpsa	0.00051086	0.00505378
O88813	Long-chain-fatty-acid--CoA ligase 5	Acsl5	0.000395454	0.00430501
P08542	UDP-glucuronosyltransferase 2B17	Ugt2b17	0.000377037	0.0337965
P11497	Acetyl-CoA carboxylase 1;Biotin carboxylase	Acaca	0.000314709	0.00327362
P63029	Translationally-controlled tumor protein	Tpt1;LOC100360791	0.000283443	0.0568797
Q9Z122	Fatty acid desaturase 2	Fads2	0.000279018	0.0004944
P85968	6-phosphogluconate dehydrogenase, decarboxylating	Pgd	0.000276923	0.0160564
B0BNF9		Hao1	0.000274913	0.0462172
Q5PPL3	Sterol-4-alpha-carboxylate 3-dehydrogenase, decarboxylating	Nsdhl	0.00027337	0.0215065
P05370	Glucose-6-phosphate 1-dehydrogenase	G6pdx	0.000271488	0.000267933
D3ZFJ2			0.000245425	0.00190068
F1M013	60S ribosomal protein L7a	LOC100910109;Rpl7a;RGD1562953;RGD1559149;RGD1562409;LOC680161	0.000245169	0.0122216
P32232	Cystathionine beta-synthase	Cbs	0.000244495	0.038271
P13697	NADP-dependent malic enzyme	Me1	0.00022391	0.000471783
Q6P3V9	60S ribosomal protein L4	Rpl4	0.000222768	0.000251636
P05426	60S ribosomal protein L7	Rpl7	0.00021843	0.0248551
H7C5Y5	60S ribosomal protein L6	Rpl6	0.000193234	0.0102333
Q6TXE9		Eprs	0.000192545	0.00105941
P38659	Protein disulfide-isomerase A4	Pdia4	0.000189574	0.0585207
Q9EPH8	Polyadenylate-binding protein 1	Pabpc1	0.000188367	0.00339701
Q63120	Canalicular multispecific organic anion transporter 1	Abcc2	0.000178817	0.0151685
Q6P3V8		Eif4a1	0.000176307	0.011771
Q68FR6	Elongation factor 1-gamma	Eef1g	0.000167092	0.032615
B2RYX0		Naca	0.000166681	0.00990936
Q5XIM9	T-complex protein 1 subunit beta	Cct2	0.000164546	0.00244018
P62909	40S ribosomal protein S3	Rps3	0.000163243	0.04961
Q3MHS9		Cct6a	0.000162159	0.00217605
Q6P502	T-complex protein 1 subunit gamma	Cct3	0.000157763	0.00559399
P62755	40S ribosomal protein S6	Rps6	0.000153528	0.0328166
Q7TPB1	T-complex protein 1 subunit delta	Cct4	0.000152546	0.000626051
Q3KRF2	Vigilin	Hdlbp	0.000150286	0.00735872
P50399	Rab GDP dissociation inhibitor beta	Gdi2	0.000147905	0.0420708
D3ZKG9	Clustered mitochondria protein homolog	Cluh	0.000141357	2.99731e-06
P12346	Serotransferrin	Tf	0.000134777	0.0418373
G3V9J8	Glycerol-3-phosphate acyltransferase 1, mitochondrial	Gpam	0.000130487	3.40498e-05
Q4FZT9	26S proteasome non-ATPase regulatory subunit 2	Psmd2	0.000129927	0.011321
Q5VLR5		Erp44	0.000122608	0.0216913
D4ACB8		Cct8	0.000121653	0.00543178
P28480	T-complex protein 1 subunit alpha	Tcp1	0.00012136	0.00581772
Q9QVC8	Peptidyl-prolyl cis-trans isomerase FKBP4;Peptidyl-prolyl cis-trans isomerase FKBP4, N-terminally processed	Fkbp4	0.000120877	0.00659339
P50503	Hsc70-interacting protein	St13	0.000120015	0.0186687
P07308	Acyl-CoA desaturase 1	Scd1;Scd4	0.000117468	0.00177852
Q66HK8	Cytochrome P450 4F1	Cyp4f1	0.000116418	0.00271113
P02651	Apolipoprotein A-IV	Apoa4	0.000115308	0.0374272
P21531	60S ribosomal protein L3	Rpl3	0.000110572	0.0527354
Q68FQ0	T-complex protein 1 subunit epsilon	Cct5	0.000109404	0.0265505
B0BNG3		Lman2	0.000103173	0.0120121
O55215	40S ribosomal protein S2	Rps2-ps6;Rps2;LOC688473;LOC100359960	0.00010315	0.0188447
D4AD15		LOC680559;LOC100911431	0.000102559	0.00127408
Q63507	60S ribosomal protein L14	Rpl14;LOC306079	0.000101183	0.00734446
P69897	Tubulin beta-5 chain	Tubb5	9.72913e-05	0.0456016
Q920R3	Fatty acid desaturase 1	Fads1	9.28156e-05	0.0126403
P09118	Uricase	Uox	9.23008e-05	0.00858969
B5DEN5		Eef1b2	9.10741e-05	0.0390777
Q02769	Squalene synthase	Fdft1	9.04908e-05	0.00922392
O35814	Stress-induced-phosphoprotein 1	Stip1	8.77642e-05	0.00347211
Q4QQS7		Umps	8.26012e-05	0.00297866
Q5XHY5	Threonine--tRNA ligase, cytoplasmic	Tars	8.04083e-05	0.016406
Q1JU68	Eukaryotic translation initiation factor 3 subunit A	Eif3a	7.97013e-05	0.058703
Q5RJR8	Leucine-rich repeat-containing protein 59	Lrrc59	7.93846e-05	0.052533
Q3KRE8	Tubulin beta-2B chain	Tubb2b	7.7996e-05	0.00841977
P51583	Multifunctional protein ADE2;Phosphoribosylaminoimidazole-succinocarboxamide synthase;Phosphoribosylaminoimidazole carboxylase	Paics;LOC100359876	7.77491e-05	0.0421673
Q5HZE3	Thyroid hormone-inducible hepatic protein	Thrsp	7.45787e-05	0.0158968
Q4AEF8	Coatomer subunit gamma-1	Copg1	7.16407e-05	0.0454282
F1LMZ8	26S proteasome non-ATPase regulatory subunit 11	Psmd11	7.07616e-05	0.0585769
P15178	Aspartate--tRNA ligase, cytoplasmic	Dars	6.61825e-05	0.00305329
F1LRI5		Gcn1l1	6.61149e-05	0.00893391
F1M5X1		Rrbp1	6.60064e-05	0.0593267
O35547	Long-chain-fatty-acid--CoA ligase 4	Acsl4	6.5871e-05	0.0233705
Q66HA8	Heat shock protein 105 kDa	Hsph1	6.46228e-05	0.0110742
G3V679	Transferrin receptor protein 1	Tfrc	6.32565e-05	0.00315852
P41542	General vesicular transport factor p115	Uso1	6.31423e-05	0.0440439
Q5XI34		Ppp2r1a	6.19111e-05	0.0443667
B0BN93	26S proteasome non-ATPase regulatory subunit 13	Psmd13	6.10474e-05	0.0154834
P07953	6-phosphofructo-2-kinase/fructose-2,6-bisphosphatase 1;6-phosphofructo-2-kinase;Fructose-2,6-bisphosphatase	Pfkfb1	5.92863e-05	0.00120168
D4AEH3		Psmd7	5.88507e-05	0.0110969
D3ZAZ0	Eukaryotic translation initiation factor 3 subunit M	Eif3m	5.67288e-05	0.024077
G3V6W6		Psmc6	5.35574e-05	0.00658177
Q63570	26S protease regulatory subunit 6B	Psmc4	5.25584e-05	0.00917478
F7F469		Igtp	5.22675e-05	0.00011302
F1MAA5		Rangap1	5.17992e-05	0.000131603
Q4G061	Eukaryotic translation initiation factor 3 subunit B	Eif3b	5.06638e-05	0.0373895
P63036	DnaJ homolog subfamily A member 1	Dnaja1	4.9768e-05	0.00589096
E9PU28	Inosine-5-monophosphate dehydrogenase 2	Impdh2	4.87572e-05	0.0167457
Q642E5	Diphosphomevalonate decarboxylase	Mvd	4.84667e-05	0.00216534
Q68FT9	Selenocysteine lyase	Scly	4.84051e-05	0.00819987
D4AE96		Ipo7	4.81531e-05	0.0286443
O35987	NSFL1 cofactor p47	Nsfl1c	4.66016e-05	0.000360839
G3V9N0		Pabpc4	4.59918e-05	0.000916122
P54921	Alpha-soluble NSF attachment protein	Napa	4.48033e-05	0.0210153
B5DFH4		Papss2	4.34994e-05	0.00451101
Q9JJ40	Na(+)/H(+) exchange regulatory cofactor NHE-RF3	Pdzk1	4.28078e-05	0.00951455
P81795	Eukaryotic translation initiation factor 2 subunit 3	Eif2s3	4.16242e-05	0.0577744
O35821	Myb-binding protein 1A	Mybbp1a	4.09475e-05	0.00584316
P62193	26S protease regulatory subunit 4	Psmc1	4.06641e-05	0.0309447
B5DFC8	Eukaryotic translation initiation factor 3 subunit C	Eif3c	4.04923e-05	0.00840796
Q6AYU5		Pcbp2	4.0087e-05	0.0305307
Q6AYK8	Eukaryotic translation initiation factor 3 subunit D	Eif3d	3.86157e-05	0.0216428
Q6AYI1		Ddx5	3.82599e-05	0.0419486
G3V7L6	26S protease regulatory subunit 7	Psmc2	3.81939e-05	0.0401231
F1LZ05		Parp14	3.74769e-05	0.00244421
B1WC34		Prkcsh	3.73265e-05	0.0418393
Q5XIM7	Lysine--tRNA ligase	Kars	3.64821e-05	0.0138045
Q63569	26S protease regulatory subunit 6A	Psmc3	3.5196e-05	0.0335505
Q5RJP0	Aldose reductase-related protein 1	Akr1b7	3.5082e-05	0.0108353
Q5M9G3	Caprin-1	Caprin1	3.4839e-05	0.00276859
Q641X8	Eukaryotic translation initiation factor 3 subunit E	Eif3e	3.48079e-05	0.00687741
D3ZZC1		Txndc5	3.47783e-05	0.0594578
P17256	Mevalonate kinase	Mvk	3.36275e-05	0.0400799
B0BNA7	Eukaryotic translation initiation factor 3 subunit I	Eif3i	3.29988e-05	0.010459
D4A746		Gmppb	3.29746e-05	0.0453257
Q4V8E2		Psmd14	3.21029e-05	0.0317199
D4A781		Ipo5	3.13352e-05	0.00913881
D3ZMY7		Nt5c2	3.10615e-05	0.0157225
P09456	cAMP-dependent protein kinase type I-alpha regulatory subunit;cAMP-dependent protein kinase type I-alpha regulatory subunit, N-terminally processed	Prkar1a	3.102e-05	0.0215634
Q3T1L0	Aldehyde dehydrogenase family 16 member A1	Aldh16a1	3.0155e-05	0.042775
G3V7G8	Glycine--tRNA ligase	Gars	2.99329e-05	0.0339634
Q5U2U5		Plin2	2.9528e-05	0.00737204
Q9JHZ9	Sodium-coupled neutral amino acid transporter 3	Slc38a3	2.86936e-05	0.000381064
G3V8J2		Cyp8b1	2.8243e-05	0.0198453
A0JPM9	Eukaryotic translation initiation factor 3 subunit J	Eif3j	2.77604e-05	0.000417744
P68101	Eukaryotic translation initiation factor 2 subunit 1	Eif2s1	2.77083e-05	0.0200344
G3V8Q1		Cope	2.71495e-05	0.00365139
P40329	Arginine--tRNA ligase, cytoplasmic	Rars	2.6357e-05	0.0117381
Q5RKI1	Eukaryotic initiation factor 4A-II	Eif4a2	2.63174e-05	0.00469526
M0R9U5	Nuclear migration protein nudC	LOC100911422;Nudc	2.57205e-05	0.0158875
P13721	Beta-galactoside alpha-2,6-sialyltransferase 1	St6gal1	2.53247e-05	0.000248258
Q9JMI1	Acetoacetyl-CoA synthetase	Aacs	2.50445e-05	0.00678288
Q6PCT9		Psmd6	2.5033e-05	0.00467649
Q9JLZ1	Glutaredoxin-3	Glrx3	2.4743e-05	0.0432725
P04961	Proliferating cell nuclear antigen	Pcna	2.44467e-05	0.00822369
P35433	Amidophosphoribosyltransferase	Ppat	2.43626e-05	0.000588878
O88202	60 kDa lysophospholipase;L-asparaginase;Platelet-activating factor acetylhydrolase	Aspg	2.37127e-05	0.0377495
D3ZBE2		Acacb	2.36762e-05	0.00550948
Q6AY86	Vacuolar protein sorting-associated protein 26A	Vps26a	2.30024e-05	0.00537122
Q5XI89	NXPE family member 4	Nxpe4	2.27821e-05	0.0118904
Q641Z6	EH domain-containing protein 1	Ehd1	2.23221e-05	0.0109752
O70593	Small glutamine-rich tetratricopeptide repeat-containing protein alpha	Sgta	2.2288e-05	0.00168626
Q5HZY0	UBX domain-containing protein 4	Ubxn4	2.1672e-05	0.00572524
A0JPJ7	Obg-like ATPase 1	Ola1	2.13782e-05	0.0245757
Q5XIG8	Serine-threonine kinase receptor-associated protein	Strap;LOC100910575	2.09907e-05	0.0015864
B2GV97		LOC679383	2.07932e-05	0.036065
M0RA08		Plin3	2.07052e-05	0.00759528
Q6MG49	Large proline-rich protein BAG6	Bag6	2.03439e-05	0.000159571
Q62904	3-keto-steroid reductase	Hsd17b7	1.97877e-05	0.058836
F1LMQ3		Psmd8	1.97874e-05	0.0549013
Q5RK24		Pmvk	1.89242e-05	0.0269739
Q6AYH5	Dynactin subunit 2	Dctn2	1.874e-05	0.0131073
Q6P6T9	Importin subunit alpha	Kpna2;LOC100359600	1.83932e-05	0.00899799
P18125	Cholesterol 7-alpha-monooxygenase	Cyp7a1	1.83377e-05	0.00016624
F7FIU6	Glutamine-dependent NAD(+) synthetase	Nadsyn1	1.80189e-05	0.0233345
B0BNG0	ER membrane protein complex subunit 2	Emc2	1.79304e-05	0.019627
Q3KRC3		Srpr	1.78393e-05	0.00362568
P19139	Casein kinase II subunit alpha	Csnk2a1	1.75628e-05	0.0309435
Q6DGG0	Peptidyl-prolyl cis-trans isomerase D	Ppid;Ppidl1	1.74361e-05	0.0431021
D3ZD89		Naa15	1.68785e-05	0.00116766
Q6P7P5	Basic leucine zipper and W2 domain-containing protein 1	Bzw1	1.6601e-05	0.00360615
G3V6B0		Pdxdc1	1.59766e-05	2.12862e-05
P82808	Glutamine--fructose-6-phosphate aminotransferase [isomerizing] 1	Gfpt1	1.59116e-05	0.00174193
Q62940	E3 ubiquitin-protein ligase NEDD4	Nedd4	1.59031e-05	0.0201399
F1LU48		Ergic1	1.56265e-05	0.018531
D4A2D7		Ipo4	1.54847e-05	0.0154836
G3V907	Peroxisomal biogenesis factor 19	LOC100911356;Pex19	1.47834e-05	0.0377796
D3ZCT7		Sec23b	1.4635e-05	0.0322713
P54319	Phospholipase A-2-activating protein	Plaa	1.45147e-05	0.0108752
E9PTW1		Scamp3	1.43581e-05	0.0379891
O08623	Sequestosome-1	Sqstm1	1.43404e-05	0.0475268
F7EKL8	UDP-glucose 4-epimerase	Gale	1.42221e-05	0.0299087
P52020	Squalene monooxygenase	Sqle	1.38778e-05	0.0412295
D4A4T9	Cysteine and histidine-rich domain-containing protein 1	Chordc1	1.37157e-05	0.0186081
Q5XIF0		Tex264	1.34944e-05	0.0466696
O35303	Dynamin-1-like protein	Dnm1l	1.33612e-05	0.0221918
G3V918		Gart	1.33526e-05	0.056102
P51639	3-hydroxy-3-methylglutaryl-coenzyme A reductase	Hmgcr	1.32605e-05	0.0364229
Q5RK09	Eukaryotic translation initiation factor 3 subunit G	Eif3g	1.2901e-05	0.00370216
P08753	Guanine nucleotide-binding protein G(k) subunit alpha	Gnai3	1.28015e-05	0.0551115
P08033	Gap junction beta-1 protein	Gjb1	1.25864e-05	0.0222489
B0BNF8		Htatip2	1.24885e-05	0.000475124
A1L1L2	Transmembrane protein 214	Tmem214	1.24439e-05	0.00370952
D3ZUV3		Eif2a	1.23192e-05	0.0176002
P18395	Cold shock domain-containing protein E1	Csde1	1.22811e-05	0.0179442
Q6P9U8	Eukaryotic translation initiation factor 3 subunit H	Eif3h;LOC362695	1.22547e-05	0.0198555
Q9ES53	Ubiquitin fusion degradation protein 1 homolog	Ufd1l	1.20623e-05	0.0212036
D4AAW2	Protein transport protein Sec16B	Sec16b	1.20331e-05	0.0076795
P60892	Ribose-phosphate pyrophosphokinase 1;Ribose-phosphate pyrophosphokinase	Prps1;Prps1l1	1.12431e-05	0.054142
D4AA63		Ubqln2	1.12158e-05	0.0156212
D3ZUQ7		LOC100362038	1.11261e-05	0.000165428
Q6QA69	1-acylglycerol-3-phosphate O-acyltransferase ABHD5	Abhd5	1.11191e-05	6.34933e-06
Q63468	Phosphoribosyl pyrophosphate synthase-associated protein 1	Prpsap1	1.10444e-05	0.00198893
F1LSQ6	Proteasome subunit alpha type	Psma7	1.08244e-05	0.0481613
D3ZLS5		Hectd1	1.06244e-05	0.026381
Q5XI26		Stat2	1.05688e-05	0.0263692
F7DLY1		Eps8l2	1.05237e-05	0.0201299
Q56R17	Importin subunit alpha	Kpna4	1.03043e-05	0.0555917
P08661	Mannose-binding protein C	Mbl2	9.95153e-06	0.0432488
F1M775		Diaph1	9.82774e-06	0.0516712
Q64303	Serine/threonine-protein kinase PAK 2;PAK-2p27;PAK-2p34	Pak2	9.66586e-06	0.00565346
R9PXT0	NEDD8-activating enzyme E1 catalytic subunit	Uba3	9.63159e-06	0.0300634
F1LY70		Birc6	9.60506e-06	0.035848
Q5PPJ4	Deoxyhypusine hydroxylase	Dohh	9.42493e-06	0.000740186
Q6AYN8		Mcm7	9.35886e-06	0.0179122
Q6AYD5		Gspt1	9.35684e-06	0.00858065
Q5RKG9		Eif4b	9.15358e-06	0.0225903
Q01986	Dual specificity mitogen-activated protein kinase kinase 1	Map2k1	9.1301e-06	0.00665401
Q811A2	Bone marrow stromal antigen 2	Bst2	8.93526e-06	0.0253194
Q7TP42		Sec62	8.92658e-06	0.0444217
Q5XI97	Alanyl-tRNA editing protein Aarsd1	Aarsd1	8.84594e-06	0.0108941
Q62839	Golgin subfamily A member 2	Golga2	8.7463e-06	0.0451231
P63086	Mitogen-activated protein kinase 1	Mapk1	8.63418e-06	0.036691
P24008	3-oxo-5-alpha-steroid 4-dehydrogenase 1	Srd5a1	8.57681e-06	0.0584296
Q5M7A4	Ubiquitin-like modifier-activating enzyme 5	Uba5	8.57042e-06	0.0031034
Q5XI21		Tom1	8.54348e-06	0.0128424
D4A0H4		Cul2	8.4767e-06	0.00350058
M0R7I3		Larp4	8.4203e-06	0.00364733
P22288	GTP cyclohydrolase 1	Gch1	8.37113e-06	0.0527026
Q9ER24	Ataxin-10	Atxn10	8.28422e-06	0.00526859
Q62991	Sec1 family domain-containing protein 1	Scfd1	8.28073e-06	0.0465122
Q4KLN6	Ribonucleoside-diphosphate reductase subunit M2	Rrm2;LOC100359539	8.16453e-06	0.0453622
D4A2Z6		Sec63	7.90319e-06	0.0553983
Q6P7D5	Mid1-interacting protein 1	Mid1ip1	7.66585e-06	0.00793678
Q6AYB6		Syap1	7.26021e-06	0.00190113
D3Z8X6		Dtx3l	7.23835e-06	0.0355057
D4A3S8		Nsun2	7.18403e-06	0.000724333
Q6IMX7	Hsp70-binding protein 1	Hspbp1	7.17027e-06	0.0154162
A1A5Q1		Parp9	7.14427e-06	0.0481822
D4A0E2		Napg	7.0129e-06	0.0324352
Q6P6S4	Nucleotide exchange factor SIL1	Sil1	6.79872e-06	0.00125012
F1LNL3		Abca1	6.72584e-06	0.0410538
G3V8B8		Dnajc7	6.64063e-06	0.000278094
D4A777		Fam114a1;Fam114a1l1	6.58565e-06	0.0474429
Q5M7T1	Probable cytosolic iron-sulfur protein assembly protein CIAO1	Ciao1	6.48944e-06	0.0247852
D3ZWN1		Zfp259	6.0961e-06	0.042007
Q4V892	Single Ig IL-1-related receptor	Sigirr	5.9269e-06	0.0574008
D3ZJ77		Cab39	5.88237e-06	0.0223821
D3ZV96		Fam84b	5.79024e-06	0.0311771
Q8R4U9	Serine/threonine-protein kinase Sgk2	Sgk2	5.77297e-06	0.00219124
Q63186	Translation initiation factor eIF-2B subunit delta	Eif2b4	5.69822e-06	0.0510501
E9PTH4		Gltpd2	5.56004e-06	4.18734e-05
Q64535	Copper-transporting ATPase 2	Atp7b	5.52995e-06	0.058912
F7ELI0		Drg1	5.4909e-06	0.0567224
Q9Z158	Syntaxin-17	Stx17	5.29301e-06	0.00820874
D4A9U6		Ubr2	5.28429e-06	0.0514502
D3ZP96		Mcm2	5.2144e-06	0.00565905
P14056	Serine/threonine-protein kinase A-Raf	Araf	5.19968e-06	0.000437328
A1L134	Ancient ubiquitous protein 1	Aup1	5.10835e-06	0.0411106
D3ZHW0		Dhx29	5.07174e-06	0.0192873
F1M678		Ptprd	5.03465e-06	0.0196072
Q09326	Alpha-1,6-mannosyl-glycoprotein 2-beta-N-acetylglucosaminyltransferase	Mgat2	5.0107e-06	0.0224796
B5DEK0		Rprd1b	5.00044e-06	0.0394335
Q6AYB5	Signal recognition particle 54 kDa protein	Srp54	4.92043e-06	0.0543175
Q5FWT1	Protein FAM98A	Fam98a	4.8078e-06	0.0509194
B2RYJ8	Epithelial splicing regulatory protein 2	Esrp2	4.79932e-06	0.0336769
Q5U1Z0	Rab3 GTPase-activating protein non-catalytic subunit	Rab3gap2	4.77976e-06	0.0335177
Q80W92	Protein VAC14 homolog	Vac14	4.68984e-06	0.00188342
Q66H39	ATP-binding cassette sub-family F member 3	Abcf3	4.67317e-06	0.0135478
D3ZNX9		Mapk1ip1l	4.54079e-06	0.0378752
Q5U2M6	DDB1- and CUL4-associated factor 8	Dcaf8	4.51679e-06	0.0590326
D4A4X7		Mospd2	4.48445e-06	0.0236449
B1WC02		Ctps	4.34347e-06	0.00213301
F1LNC4	Vesicle transport through interaction with t-SNAREs homolog 1B	RGD1560475;Vti1b	4.32929e-06	0.057339
Q9QUR2	Dynactin subunit 4	Dctn4	4.28747e-06	0.0133422
Q80ZG1	Synembryn-A	Ric8a	4.22348e-06	0.0390177
F7EP67	Endothelin-converting enzyme 1	Ece1	4.16247e-06	0.0062466
Q8R478	WW domain-binding protein 2	Wbp2	4.12218e-06	0.033697
Q496Z0	Elongator complex protein 2	Elp2	4.10657e-06	0.0365589
A9CMB8		Mcm6	4.09321e-06	0.00521111
P50116	Protein S100-A9	S100a9	4.09025e-06	0.00868921
Q62764	Y-box-binding protein 3	Ybx3	4.04426e-06	0.0046861
P69736	Endothelial differentiation-related factor 1	Edf1	3.98337e-06	0.00459462
F7F246		Casp7	3.93578e-06	0.00536308
Q920L6	Elongation of very long chain fatty acids protein 6	Elovl6	3.92955e-06	0.0197017
Q66H09		Ttc1	3.83333e-06	0.0248093
M0RAL0		Slc39a4	3.81958e-06	0.0324492
Q6AYN2	Store-operated calcium entry-associated regulatory factor	Tmem66	3.81803e-06	0.0126806
F1LU27		Focad	3.76665e-06	0.00640466
Q6P7D4	Cytochrome P450 20A1	Cyp20a1	3.74632e-06	0.0404674
Q63450	Calcium/calmodulin-dependent protein kinase type 1	Camk1	3.60109e-06	0.0572598
Q5U2Q5	Ribonucleoside-diphosphate reductase	Rrm1	3.50637e-06	0.0223073
F1LYX9		Dsg2	3.36767e-06	0.0228192
B1H227		Rcc1	3.36598e-06	0.0451981
G3V6U9		LOC100910833	3.32829e-06	0.055711
Q6P503		Atp6v1d	3.32749e-06	0.00723664
Q6QI44	N-alpha-acetyltransferase 25, NatB auxiliary subunit	Naa25	3.26303e-06	0.0374023
D3ZFP4		Mcm3	3.16281e-06	0.0551895
Z4YNG7	Oxidation resistance protein 1	Oxr1	3.14286e-06	0.0131941
Q6P798	RCC1 and BTB domain-containing protein 2	Rcbtb2	3.10411e-06	0.0519838
M0RD95	Cyclin-dependent kinase 7	Cdk7	3.07953e-06	0.057877
D3ZQ25		Fbln1	3.04433e-06	0.0130903
Q75UQ2	Craniofacial development protein 1	Cfdp1	2.89664e-06	0.0193027
Q6QGW5	Steroid receptor RNA activator 1	Sra1	2.81887e-06	0.0470717
Q32PZ3	Protein unc-45 homolog A	Unc45a	2.77184e-06	0.0414483
D3ZZM3		Cog4	2.68736e-06	0.0106273
B2RYP3		Fam91a1	2.50195e-06	0.0510861
O08836	Immunoglobulin-binding protein 1	Igbp1	2.4828e-06	0.0486022
Q3ZU82	Golgin subfamily A member 5	Golga5	2.4375e-06	0.00485752
D4A0W7		Fndc3b	2.40748e-06	0.0547931
F1M265	Palladin	LOC100360205;LOC290704;Palld	2.37638e-06	0.0190935
D3ZEM8		Tsr1	2.36741e-06	0.00763246
D3ZT01		Cog2	2.30785e-06	0.0577923
F1LWK5		Paqr9	2.30773e-06	0.048261
M0R686		Irgq	2.07577e-06	0.0160518
D3ZUJ5		Dtymk	2.00457e-06	0.0383918
F1M4I4		Vps51	1.97207e-06	0.0314082
F1MA65		Hook3	1.95547e-06	0.0393438
D3ZH75		Akt1s1	1.83636e-06	0.0476052
P43427	Solute carrier family 2, facilitated glucose transporter member 5	Slc2a5	1.72168e-06	0.0567154
P47816	Programmed cell death protein 2	Pdcd2	1.70407e-06	0.00520439
F1LP59		RGD1306487	1.68546e-06	0.00892057
B5DFM8		Bcas2	1.68376e-06	0.0435252
Q80WL2	Bystin	Bysl	1.62008e-06	0.00173892
F1M7B8		Ube3a	1.60787e-06	0.0517179
D3ZQE8		Xpo5	1.54376e-06	0.0386119
Q6VBQ8	RNA-binding protein PNO1	Pno1	1.43969e-06	0.0173667
M0R851	Ubiquitin carboxyl-terminal hydrolase;Ubiquitin carboxyl-terminal hydrolase 4	Usp4	1.41195e-06	0.0435984
M0RAN8		Ipo8	1.22946e-06	0.051667
Q5BJZ6	UPF0586 protein C9orf41 homolog		1.18698e-06	0.0320579
D4AB70		Edem3	1.15283e-06	0.0477741
G3V8S9		Camp	1.14895e-06	0.00750916
M0R515		Nudt13	1.14388e-06	0.0529274
F1LPB4		Akap9	1.09333e-06	0.019474
Q6AY23	Pyrroline-5-carboxylate reductase 2;Pyrroline-5-carboxylate reductase	Pycr2;Pycr1	1.02777e-06	0.00804895
Q6YDN8		Bwk1	9.6689e-07	0.0269641
Q5BJK8	Golgi integral membrane protein 4	Golim4	9.60729e-07	0.0515154
B2GV14		Txlna	9.03986e-07	0.0582672
P19814	Trans-Golgi network integral membrane protein TGN38	Ttgn1	8.41104e-07	0.0103792
D3ZPD8		B3galt1	7.06092e-07	0.0279368
Q5PPJ9	Endophilin-B2	Sh3glb2	5.17108e-07	0.0483095
M0R3Y7		LOC100911660	5.08204e-07	0.0400151
D4ACA2		N6amt1	4.85911e-07	0.00874448
D3ZPJ9		Ascc2	3.9195e-07	0.0339419
Q80VJ4	Glycerophosphocholine phosphodiesterase GPCPD1	Gpcpd1	3.73499e-07	0.0376882
F1LTQ3			3.359e-07	0.0367686
Q5FVC7	Arf-GAP with coiled-coil, ANK repeat and PH domain-containing protein 2	Acap2	3.2498e-07	0.0425029
M0R8E8		Ipo11	3.17322e-07	0.0243228
Q5M840	G0/G1 switch protein 2	G0s2	3.16035e-07	0.000758633
Q8CHN3	WAP four-disulfide core domain protein 2	Wfdc2	-1.57114e-07	0.0425595
F1LSL3	Inositol 1,4,5-trisphosphate receptor type 3	Itpr3	-1.7139e-07	0.0274556
G3V9L1		Tex2	-2.48117e-07	0.0448361
D3ZIX4		H1fx	-4.94807e-07	0.0267699
P62916	Transcription initiation factor IIB	Gtf2b	-6.04564e-07	0.0572947
Q5RJQ7	Succinate dehydrogenase assembly factor 2, mitochondrial	Sdhaf2	-6.47546e-07	0.0338229
Q62867	Gamma-glutamyl hydrolase	Ggh	-6.8345e-07	0.0499737
G3V7E3		Gzma	-7.06487e-07	0.0290237
D3ZF58		Rfesd	-7.26057e-07	0.0227548
D4A1T7		Fam173a	-7.82514e-07	0.035609
Q9WVT0	Probable G-protein coupled receptor 116	Gpr116	-8.34417e-07	0.0250442
F1LVL4		LOC100363935	-8.90615e-07	0.0530427
Q9Z2J5	Vesicle-associated membrane protein 5	Vamp5	-1.00016e-06	0.0514679
Q5M7A7	CB1 cannabinoid receptor-interacting protein 1	Cnrip1	-1.15217e-06	0.0243584
Q9ET45		Bnip3	-1.4847e-06	0.00826404
Q5XI68	Protein Dr1	Dr1	-1.58743e-06	0.0498218
P55009	Allograft inflammatory factor 1	Aif1	-1.68526e-06	0.0382608
P21743	Insulin-like growth factor-binding protein 1	Igfbp1	-1.71854e-06	0.00186288
Q5BJU0		Rras2	-1.91551e-06	0.0504464
Q68FY8	Vitamin K-dependent protein C;Vitamin K-dependent protein C light chain;Vitamin K-dependent protein C heavy chain;Activation peptide	Proc	-2.17006e-06	0.0128173
Q5GAM6		Ang	-2.57019e-06	0.0236819
D4A040		Mrps11;LOC690271	-2.59935e-06	0.0478938
P27274	CD59 glycoprotein	Cd59	-2.74564e-06	0.0493704
P29288	Tartrate-resistant acid phosphatase type 5	Acp5;LOC100911394	-2.96851e-06	0.0516249
Q4QQW8	Putative phospholipase B-like 2	Plbd2	-3.07956e-06	0.0541337
P04638	Apolipoprotein A-II	Apoa2	-3.26377e-06	0.0534215
B2GUZ9		Fam49b	-3.52899e-06	0.0392935
G3V904		Pld4	-3.53796e-06	0.000584209
F1M8Y4		Deptor	-3.70724e-06	0.00502032
P53813	Vitamin K-dependent protein S	Pros1	-3.74265e-06	0.00079995
Q499S6		Ctsf	-3.90348e-06	0.0293627
Q9Z118	Polypyrimidine tract-binding protein 3	Ptbp3	-3.93885e-06	0.0235364
D3ZPP2		Arl8a	-3.98913e-06	0.0498108
B1WBS6		Glb1l	-4.24423e-06	0.0334772
Q9JID1	Programmed cell death protein 4	Pdcd4	-4.76458e-06	0.000273404
Q641Z7	Acid sphingomyelinase-like phosphodiesterase 3a	Smpdl3a	-4.77554e-06	0.0166151
M0RAV0		LOC100911032	-4.97638e-06	0.055272
Q6XFR6	Glycophorin-C	Gypc	-5.16833e-06	0.0360683
Q5FVS2	Plasma kallikrein;Plasma kallikrein heavy chain;Plasma kallikrein light chain	Klkb1	-5.47227e-06	0.0297166
B2RYT9	Translational activator of cytochrome c oxidase 1	Taco1	-5.54016e-06	0.0505377
Q5BJX1	39S ribosomal protein L41, mitochondrial	Mrpl41;RGD1560917	-5.8181e-06	0.0400693
E9PTI6		Raly	-6.19555e-06	0.0484209
P17164	Tissue alpha-L-fucosidase	Fuca1	-6.39935e-06	0.0397471
Q32KJ5		Gns	-6.40408e-06	0.0570697
Q7TP98	Interleukin enhancer-binding factor 2	Ilf2	-6.60275e-06	0.00288689
Q9JIL3	Interleukin enhancer-binding factor 3	Ilf3	-6.7548e-06	0.0554846
Q6I7R1		Dhrs7	-7.50602e-06	0.0277331
D4A720		Srsf7	-7.80593e-06	0.0540765
D3ZYM7		Lyrm4	-8.11264e-06	0.0536386
D4A7X5		Ppm1k	-8.2587e-06	0.000367779
D4AEL0		LOC691083	-8.33492e-06	0.0409951
B5DEQ4		Snrpb2	-8.52609e-06	0.0110856
F1LN98		Ewsr1	-8.5486e-06	0.0482492
Q5BJN5	Mitochondrial intermembrane space import and assembly protein 40	Chchd4	-8.59704e-06	0.0521033
Q6AXM5	Choline/ethanolaminephosphotransferase 1	Cept1	-8.7278e-06	0.0292854
F1M1M6	Coagulation factor IX	F9	-8.88618e-06	0.0591529
Q3KR55	Splicing factor U2AF 26 kDa subunit	LOC687575;U2af1l4	-9.17517e-06	0.0394265
D3ZBM3	Ferrochelatase	Fech	-9.26258e-06	0.0116507
Q3V5X8		Endog	-9.69611e-06	0.0575922
Q6AYF4	Integrin beta-6	Itgb6	-1.017e-05	0.01133
D3ZIP3		Epb4.1	-1.01965e-05	0.0339046
D3ZA85		Nfu1	-1.05006e-05	0.0210811
Q62920	PDZ and LIM domain protein 5	Pdlim5	-1.05099e-05	0.0589809
Q6URK4	Heterogeneous nuclear ribonucleoprotein A3	Hnrnpa3;LOC100360986	-1.16687e-05	0.00512926
P14630	Apolipoprotein M	Apom	-1.1846e-05	0.0402749
Q6PCT8	Succinate dehydrogenase [ubiquinone] cytochrome b small subunit, mitochondrial	Sdhd	-1.19507e-05	0.0335981
D3ZUM4	Beta-galactosidase	Glb1	-1.21724e-05	0.0368052
M0RCF3	Integrin beta	Itgb3	-1.23911e-05	0.0104677
Q6P734	Plasma protease C1 inhibitor	Serping1	-1.28689e-05	0.0546538
P84586	RNA-binding motif protein, X chromosome retrogene-like;RNA-binding motif protein, X chromosome retrogene-like, N-terminally processed;RNA binding motif protein, X-linked-like-1	Rbmxrtl;Rbmxl1	-1.29569e-05	0.00934265
Q8CHN5		Npc2	-1.31807e-05	0.0331081
B5DF57		Epb42	-1.3463e-05	0.0517084
F1MAQ9		LOC683761;RT1-CE3;RT1-CE2	-1.47354e-05	0.0333723
M0RAD8		LOC100909903	-1.50959e-05	0.0343322
O55004	Ribonuclease 4	Rnase4	-1.52707e-05	0.00694542
P23785	Granulins;Acrogranin;Granulin-1;Granulin-2;Granulin-3;Granulin-4;Granulin-5;Granulin-6;Granulin-7	Grn	-1.59481e-05	0.0341888
D4A8Z3		Frrs1	-1.71846e-05	0.00825837
M0RCS2		LOC686610	-1.72426e-05	0.0395412
D4ABT8		Hnrnpul2	-1.74134e-05	0.0221017
B2RZB7		Snrpd1	-1.80118e-05	0.0250492
Q641X3	Beta-hexosaminidase subunit alpha	Hexa	-1.83384e-05	0.0146687
D3ZQ57		Plxnb2	-1.84777e-05	0.0529374
B2GUX7		Creg1	-1.93207e-05	0.0098526
Q9JJ19	Na(+)/H(+) exchange regulatory cofactor NHE-RF1	Slc9a3r1	-2.05338e-05	0.0475434
Q9EPB1	Dipeptidyl peptidase 2	Dpp7	-2.06551e-05	0.00710133
P04256	Heterogeneous nuclear ribonucleoprotein A1	Hnrnpa1	-2.18333e-05	0.0177066
B5DF91		Elavl1	-2.23162e-05	0.00984967
P43244	Matrin-3	Matr3	-2.26001e-05	0.00963407
P51869	Cytochrome P450 4F4	Cyp4f4	-2.30952e-05	0.0131544
Q66H12	Alpha-N-acetylgalactosaminidase	Naga	-2.52983e-05	0.00734507
M0R907		LOC687711	-2.57111e-05	0.0541573
P30919	N(4)-(Beta-N-acetylglucosaminyl)-L-asparaginase;Glycosylasparaginase alpha chain;Glycosylasparaginase beta chain	Aga	-2.6648e-05	0.0288458
Q6AXR4	Beta-hexosaminidase subunit beta;Beta-hexosaminidase	Hexb	-2.66554e-05	0.00119301
D3ZDE4		Dguok	-2.69072e-05	0.0368867
Q3B8N9		Bphl	-3.03884e-05	0.0501141
D4A9D6		Dhx9	-3.11295e-05	0.0038589
D3ZZT9		Col14a1	-3.19009e-05	0.0111554
Q64536	[Pyruvate dehydrogenase [lipoamide]] kinase isozyme 2, mitochondrial	Pdk2	-3.19924e-05	0.0105635
Q6MGB5	Estradiol 17-beta-dehydrogenase 8	Hsd17b8	-3.20613e-05	0.0510096
Q9R1T3	Cathepsin Z	Ctsz	-3.51119e-05	0.0316098
P56522	NADPH:adrenodoxin oxidoreductase, mitochondrial	Fdxr	-3.61048e-05	0.0544598
P07154	Cathepsin L1;Procathepsin L;Cathepsin L1 heavy chain;Cathepsin L1 light chain	Ctsl1	-3.78067e-05	0.00161096
P16573	Carcinoembryonic antigen-related cell adhesion molecule 1	Ceacam1	-3.83885e-05	0.0063286
Q9JJ54	Heterogeneous nuclear ribonucleoprotein D0;Heterogeneous nuclear ribonucleoprotein C	Hnrnpd;Hnrpd;Hnrnpc	-3.90309e-05	0.0579898
M0RDK9		Acad8	-4.10607e-05	0.0150296
G3V9R8		Hnrnpc	-4.11394e-05	0.00271366
D3ZGU2		Acss3	-4.25402e-05	0.0182851
Q6P2A5	GTP:AMP phosphotransferase AK3, mitochondrial	Ak3	-4.25691e-05	0.0587196
I6L9G6		Tardbp	-4.52609e-05	0.00763327
Q6IRK4		Slc37a4	-4.64886e-05	0.0283532
Q00438	Polypyrimidine tract-binding protein 1	Ptbp1	-4.72004e-05	0.0475983
F1M8L6		Ndufa3;LOC684509	-4.94616e-05	0.029965
O88867	Kynurenine 3-monooxygenase	Kmo	-5.1225e-05	0.0203043
P62332	ADP-ribosylation factor 6	Arf6	-5.26262e-05	0.0495285
P17625	Glycogen [starch] synthase, liver	Gys2	-6.16326e-05	0.055785
F7F0U1		Cyp3a9	-6.47975e-05	0.00668724
Q920A6	Retinoid-inducible serine carboxypeptidase	Scpep1	-6.67936e-05	0.053065
Q68FZ8		Pccb	-6.84554e-05	0.0350196
G3V9Q3	Heterogeneous nuclear ribonucleoprotein H;Heterogeneous nuclear ribonucleoprotein H, N-terminally processed	Hnrph1;Hnrnph1	-7.11947e-05	0.0314867
P23680	Serum amyloid P-component	Apcs	-7.13328e-05	0.0332471
Q9EQV6	Tripeptidyl-peptidase 1	Tpp1	-7.23769e-05	0.0116181
Q6AYS3		Ctsa	-7.3037e-05	0.0133786
P09006	Serine protease inhibitor A3N	Serpina3n	-7.33473e-05	0.000791468
Q6AYS2		Sfxn1	-7.34337e-05	0.0331941
F2Z3R2		Hnrnpl	-7.47405e-05	0.000207926
D3ZKG1		Mut	-7.51714e-05	0.00616251
F1LSP2		Acad10	-7.63753e-05	0.00933845
Q6IRK9	Carboxypeptidase Q	Cpq	-8.48829e-05	0.000849496
Q63413	Spliceosome RNA helicase Ddx39b	Ddx39b	-8.58089e-05	0.0110664
Q5BJQ0	Chaperone activity of bc1 complex-like, mitochondrial	Adck3	-9.43935e-05	0.0151183
Q8K4C0	Dimethylaniline monooxygenase [N-oxide-forming] 5	Fmo5	-9.54251e-05	0.0463015
Q66HI5	Ferritin;Ferritin heavy chain	Fth1	-0.000112084	0.0408315
Q7M0E3	Destrin	Dstn	-0.000119071	0.0244521
Q6IMY8		Hnrnpu	-0.00012279	0.00137698
Q6P6T6	Cathepsin D;Cathepsin D 12 kDa light chain;Cathepsin D 9 kDa light chain;Cathepsin D 34 kDa heavy chain;Cathepsin D 30 kDa heavy chain	Ctsd	-0.000131944	0.00942788
P11960	2-oxoisovalerate dehydrogenase subunit alpha, mitochondrial	Bckdha	-0.000135702	0.0545562
Q5XIC0	Enoyl-CoA delta isomerase 2, mitochondrial	Eci2	-0.00014018	0.0280362
Q68G31	Phenazine biosynthesis-like domain-containing protein	Pbld	-0.000142534	0.0286851
B0BNJ4		Ethe1	-0.000144324	0.0592199
P70584	Short/branched chain specific acyl-CoA dehydrogenase, mitochondrial	Acadsb	-0.000163661	0.000624009
Q6URK4	Heterogeneous nuclear ribonucleoprotein A3	Hnrnpa3	-0.000165537	0.000279369
F1LPV8	Succinyl-CoA ligase subunit beta	Suclg2	-0.000168945	0.0494341
P04906	Glutathione S-transferase P	Gstp1	-0.000179541	0.0463877
Q62651	Delta(3,5)-Delta(2,4)-dienoyl-CoA isomerase, mitochondrial	Ech1	-0.000184951	0.00258046
P29266	3-hydroxyisobutyrate dehydrogenase, mitochondrial	Hibadh	-0.00020434	0.0335648
P57093	Phytanoyl-CoA dioxygenase, peroxisomal	Phyh	-0.000210511	0.000236677
P19511	ATP synthase subunit b, mitochondrial	Atp5f1	-0.000240105	0.0297234
Q64581	Cytochrome P450 3A18	Cyp3a18	-0.000283774	0.00740824
F1LNF1	Heterogeneous nuclear ribonucleoproteins A2/B1	Hnrnpa2b1	-0.00028463	0.00082127
P56574	Isocitrate dehydrogenase [NADP], mitochondrial	Idh2	-0.000337868	0.0393946
D4A2K1		Hoga1	-0.00039757	0.0280137
F1M1W1		Bucs1	-0.000440445	0.0565869
P07379	Phosphoenolpyruvate carboxykinase, cytosolic [GTP]	Pck1	-0.000471087	0.0045618
P05183	Cytochrome P450 3A2	Cyp3a2	-0.000528359	0.00178159
P14604	Enoyl-CoA hydratase, mitochondrial	Echs1	-0.000532706	0.0424443
F8WFI0	Delta-1-pyrroline-5-carboxylate dehydrogenase, mitochondrial	Tas1r2;Aldh4a1	-0.000634655	0.0157537
B0BMW2	3-hydroxyacyl-CoA dehydrogenase type-2	Hsd17b10	-0.000937229	0.056707
F1LN88	Aldehyde dehydrogenase, mitochondrial	Aldh2	-0.00226015	0.0239031
Q68G44	Hydroxymethylglutaryl-CoA synthase, mitochondrial	Hmgcs2	-0.00300895	0.0579972
